# Supplementary material for: Microhaplotype deep sequencing assays to capture Plasmodium vivax infection lineages
Source: Research Square preprint supplement (doi:10.21203/rs.3.rs-5099658/v1), 2024-10-17
Supplement: Supplementary file 4 [file cb5fa9cb96c112489c015b1e.xlsx]

## Sheet: Sheet1
Sample	Pv4_sample_ID	Pv41_sample_ID	Independent	Run	Sample_throughput	Study	Country	Site	Non-vivax_Species	Failed_25_reads	Specificity	Paneljudge	Assay_Sensitivity	Geographic_Potential	WGS_Concordance	FWS_vs_eCOI	eMOI_Distribution	eMOI_Distribution_site	Recurrence_IBD	Spatial_Connectivity	Drug_Resistance_Prevalence	Drug_Resistance_RCT
AF008-004_D0	VVX11934	N/A	Yes	Run2	96	Afghanistan	Afghanistan	Laghman Province	N/A	No	No	Yes	No	No	Yes	Yes	Yes	Yes	No	Yes	Yes	No
AF008_058_D0	VVX11983	N/A	Yes	Run3	384	Afghanistan	Afghanistan	Laghman Province	N/A	No	No	Yes	No	Yes	Yes	Yes	Yes	Yes	No	Yes	Yes	No
AF008_002_D0_D	N/A	N/A	Yes	Run3	384	Afghanistan	Afghanistan	Laghman Province	N/A	No	No	Yes	No	Yes	No	No	Yes	Yes	No	No	Yes	No
AF008_016_D0	N/A	N/A	Yes	Run3	384	Afghanistan	Afghanistan	Laghman Province	N/A	No	No	Yes	No	Yes	No	No	Yes	Yes	No	Yes	Yes	No
AF008_024_D0	N/A	N/A	Yes	Run3	384	Afghanistan	Afghanistan	Laghman Province	N/A	No	No	Yes	No	Yes	No	No	Yes	Yes	No	Yes	Yes	No
AF008_059_D0	N/A	N/A	Yes	Run3	384	Afghanistan	Afghanistan	Laghman Province	N/A	No	No	Yes	No	Yes	No	No	Yes	Yes	No	Yes	Yes	No
AF008_060_D0	N/A	N/A	Yes	Run3	384	Afghanistan	Afghanistan	Laghman Province	N/A	No	No	Yes	No	Yes	No	No	Yes	Yes	No	Yes	Yes	No
AF008_061_D0	N/A	N/A	Yes	Run3	384	Afghanistan	Afghanistan	Laghman Province	N/A	No	No	Yes	No	Yes	No	No	Yes	Yes	No	Yes	Yes	No
AF008_067_D0	N/A	N/A	Yes	Run3	384	Afghanistan	Afghanistan	Laghman Province	N/A	No	No	Yes	No	Yes	No	No	Yes	Yes	No	Yes	Yes	No
AF008_068_D0	N/A	N/A	Yes	Run3	384	Afghanistan	Afghanistan	Laghman Province	N/A	No	No	Yes	No	Yes	No	No	Yes	Yes	No	No	Yes	No
AF008_070_D0	N/A	N/A	Yes	Run3	384	Afghanistan	Afghanistan	Laghman Province	N/A	No	No	Yes	No	Yes	No	No	Yes	Yes	No	Yes	Yes	No
AF008_074_D0	N/A	N/A	Yes	Run3	384	Afghanistan	Afghanistan	Laghman Province	N/A	No	No	Yes	No	Yes	No	No	Yes	Yes	No	No	Yes	No
AF008_076_D0	N/A	N/A	Yes	Run3	384	Afghanistan	Afghanistan	Laghman Province	N/A	No	No	Yes	No	Yes	No	No	Yes	Yes	No	No	Yes	No
AF008_082_D0	N/A	N/A	Yes	Run3	384	Afghanistan	Afghanistan	Laghman Province	N/A	No	No	Yes	No	Yes	No	No	Yes	Yes	No	No	Yes	No
AF008_083_D0	N/A	N/A	Yes	Run3	384	Afghanistan	Afghanistan	Laghman Province	N/A	No	No	Yes	No	Yes	No	No	Yes	Yes	No	Yes	Yes	No
AF008_084_D0	N/A	N/A	Yes	Run3	384	Afghanistan	Afghanistan	Laghman Province	N/A	No	No	Yes	No	Yes	No	No	Yes	Yes	No	Yes	Yes	No
AF008_088_D0	N/A	N/A	Yes	Run3	384	Afghanistan	Afghanistan	Laghman Province	N/A	No	No	Yes	No	Yes	No	No	Yes	Yes	No	Yes	Yes	No
AF008_089_D0	N/A	N/A	Yes	Run3	384	Afghanistan	Afghanistan	Laghman Province	N/A	No	No	Yes	No	Yes	No	No	Yes	Yes	No	No	Yes	No
AF008_090_D0	N/A	N/A	Yes	Run3	384	Afghanistan	Afghanistan	Laghman Province	N/A	No	No	Yes	No	Yes	No	No	Yes	Yes	No	Yes	Yes	No
AF008_092_D0	N/A	N/A	Yes	Run3	384	Afghanistan	Afghanistan	Laghman Province	N/A	No	No	Yes	No	Yes	No	No	Yes	Yes	No	Yes	Yes	No
AF008_094_D0	N/A	N/A	Yes	Run3	384	Afghanistan	Afghanistan	Laghman Province	N/A	No	No	Yes	No	Yes	No	No	Yes	Yes	No	Yes	Yes	No
AF008_095_D0	N/A	N/A	Yes	Run3	384	Afghanistan	Afghanistan	Laghman Province	N/A	No	No	Yes	No	Yes	No	No	Yes	Yes	No	Yes	Yes	No
AF008_096_D0	N/A	N/A	Yes	Run3	384	Afghanistan	Afghanistan	Laghman Province	N/A	No	No	Yes	No	Yes	No	No	Yes	Yes	No	No	Yes	No
AF008_102_D0	N/A	N/A	Yes	Run3	384	Afghanistan	Afghanistan	Laghman Province	N/A	No	No	Yes	No	Yes	No	No	Yes	Yes	No	Yes	Yes	No
AF008_106_D0	N/A	N/A	Yes	Run3	384	Afghanistan	Afghanistan	Laghman Province	N/A	No	No	Yes	No	Yes	No	No	Yes	Yes	No	Yes	Yes	No
AF008_107_D0	N/A	N/A	Yes	Run3	384	Afghanistan	Afghanistan	Laghman Province	N/A	No	No	Yes	No	Yes	No	No	Yes	Yes	No	No	Yes	No
AF008_115_D0	N/A	N/A	Yes	Run3	384	Afghanistan	Afghanistan	Laghman Province	N/A	No	No	Yes	No	Yes	No	No	Yes	Yes	No	Yes	Yes	No
AF008_117_D0	N/A	N/A	Yes	Run3	384	Afghanistan	Afghanistan	Laghman Province	N/A	No	No	Yes	No	Yes	No	No	Yes	Yes	No	Yes	Yes	No
AF008_119_D0	N/A	N/A	Yes	Run3	384	Afghanistan	Afghanistan	Laghman Province	N/A	No	No	Yes	No	Yes	No	No	Yes	Yes	No	Yes	Yes	No
AF008_120_D0	N/A	N/A	Yes	Run3	384	Afghanistan	Afghanistan	Laghman Province	N/A	No	No	Yes	No	Yes	No	No	Yes	Yes	No	Yes	Yes	No
AF008_058_D0_NV22	N/A	N/A	No	Run3	384	Afghanistan	Afghanistan	Laghman Province	N/A	Yes	No	No	No	No	No	No	No	No	No	No	No	No
AF001_171_D0	N/A	N/A	Yes	Run3	384	Afghanistan	Afghanistan	Nangarhar Province	N/A	Yes	No	Yes	No	No	No	No	Yes	Yes	No	No	Yes	No
AF001_174_D0	N/A	VVX12722	Yes	Run3	384	Afghanistan	Afghanistan	Nangarhar Province	N/A	No	No	Yes	No	Yes	Yes	Yes	Yes	Yes	No	No	Yes	No
AF001_125_D0	VVX11820	N/A	Yes	Run3	384	Afghanistan	Afghanistan	Nangarhar Province	N/A	No	No	Yes	No	Yes	Yes	Yes	Yes	Yes	No	Yes	Yes	No
AF001_126_D0	VVX11821	N/A	Yes	Run3	384	Afghanistan	Afghanistan	Nangarhar Province	N/A	No	No	Yes	No	Yes	Yes	Yes	Yes	Yes	No	Yes	Yes	No
AF001_143_D0	VVX11827	N/A	Yes	Run3	384	Afghanistan	Afghanistan	Nangarhar Province	N/A	No	No	Yes	No	Yes	Yes	Yes	Yes	Yes	No	No	Yes	No
AF001_152_D0	VVX11833	N/A	Yes	Run3	384	Afghanistan	Afghanistan	Nangarhar Province	N/A	No	No	Yes	No	Yes	Yes	Yes	Yes	Yes	No	Yes	Yes	No
AF001_163_D0	VVX11843	N/A	Yes	Run3	384	Afghanistan	Afghanistan	Nangarhar Province	N/A	No	No	Yes	No	Yes	Yes	Yes	Yes	Yes	No	No	Yes	No
AF001_168_D0	VVX11847	N/A	Yes	Run3	384	Afghanistan	Afghanistan	Nangarhar Province	N/A	No	No	Yes	No	Yes	Yes	Yes	Yes	Yes	No	Yes	Yes	No
AF001_169_D0	VVX11848	N/A	Yes	Run3	384	Afghanistan	Afghanistan	Nangarhar Province	N/A	No	No	Yes	No	Yes	Yes	Yes	Yes	Yes	No	Yes	Yes	No
AF001_170_D0	VVX11849	N/A	Yes	Run3	384	Afghanistan	Afghanistan	Nangarhar Province	N/A	No	No	Yes	No	Yes	Yes	Yes	Yes	Yes	No	No	Yes	No
AF001_264_D0	VVX11905	N/A	Yes	Run3	384	Afghanistan	Afghanistan	Nangarhar Province	N/A	No	No	Yes	No	Yes	Yes	Yes	Yes	Yes	No	No	Yes	No
AF001_266_D0	VVX11907	N/A	Yes	Run3	384	Afghanistan	Afghanistan	Nangarhar Province	N/A	No	No	Yes	No	Yes	Yes	Yes	Yes	Yes	No	Yes	Yes	No
AF001_271_D0	VVX11912	N/A	Yes	Run3	384	Afghanistan	Afghanistan	Nangarhar Province	N/A	No	No	Yes	No	Yes	Yes	Yes	Yes	Yes	No	Yes	Yes	No
AF001_092_D0RP3_NV22	N/A	N/A	Yes	Run3	384	Afghanistan	Afghanistan	Nangarhar Province	N/A	No	No	Yes	No	Yes	No	No	Yes	Yes	No	No	Yes	No
AF001_101_D0	N/A	N/A	Yes	Run3	384	Afghanistan	Afghanistan	Nangarhar Province	N/A	No	No	Yes	No	Yes	No	No	Yes	Yes	No	No	Yes	No
AF001_102_D0	N/A	N/A	Yes	Run3	384	Afghanistan	Afghanistan	Nangarhar Province	N/A	No	No	Yes	No	Yes	No	No	Yes	Yes	No	Yes	Yes	No
AF001_103_D0	N/A	N/A	Yes	Run3	384	Afghanistan	Afghanistan	Nangarhar Province	N/A	No	No	Yes	No	Yes	No	No	Yes	Yes	No	Yes	Yes	No
AF001_104_D0	N/A	N/A	Yes	Run3	384	Afghanistan	Afghanistan	Nangarhar Province	N/A	No	No	Yes	No	Yes	No	No	Yes	Yes	No	Yes	Yes	No
AF001_112_D0	N/A	N/A	Yes	Run3	384	Afghanistan	Afghanistan	Nangarhar Province	N/A	No	No	Yes	No	Yes	No	No	Yes	Yes	No	No	Yes	No
AF001_114_D0	N/A	N/A	Yes	Run3	384	Afghanistan	Afghanistan	Nangarhar Province	N/A	No	No	Yes	No	Yes	No	No	Yes	Yes	No	Yes	Yes	No
AF001_117_D0	N/A	N/A	Yes	Run3	384	Afghanistan	Afghanistan	Nangarhar Province	N/A	No	No	Yes	No	Yes	No	No	Yes	Yes	No	No	Yes	No
AF001_118_D0	N/A	N/A	Yes	Run3	384	Afghanistan	Afghanistan	Nangarhar Province	N/A	No	No	Yes	No	Yes	No	No	Yes	Yes	No	No	Yes	No
AF001_120_D0	N/A	N/A	Yes	Run3	384	Afghanistan	Afghanistan	Nangarhar Province	N/A	No	No	Yes	No	Yes	No	No	Yes	Yes	No	Yes	Yes	No
AF001_122_D0	N/A	N/A	Yes	Run3	384	Afghanistan	Afghanistan	Nangarhar Province	N/A	No	No	Yes	No	Yes	No	No	Yes	Yes	No	No	Yes	No
AF001_123_D0	N/A	N/A	Yes	Run3	384	Afghanistan	Afghanistan	Nangarhar Province	N/A	No	No	Yes	No	Yes	No	No	Yes	Yes	No	Yes	Yes	No
AF001_127_D0	N/A	N/A	Yes	Run3	384	Afghanistan	Afghanistan	Nangarhar Province	N/A	No	No	Yes	No	Yes	No	No	Yes	Yes	No	Yes	Yes	No
AF001_128_D0	N/A	N/A	Yes	Run3	384	Afghanistan	Afghanistan	Nangarhar Province	N/A	No	No	Yes	No	Yes	No	No	Yes	Yes	No	No	Yes	No
AF001_129_D0	N/A	N/A	Yes	Run3	384	Afghanistan	Afghanistan	Nangarhar Province	N/A	No	No	Yes	No	Yes	No	No	Yes	Yes	No	No	Yes	No
AF001_130_D0	N/A	N/A	Yes	Run3	384	Afghanistan	Afghanistan	Nangarhar Province	N/A	No	No	Yes	No	Yes	No	No	Yes	Yes	No	Yes	Yes	No
AF001_131_D0	N/A	N/A	Yes	Run3	384	Afghanistan	Afghanistan	Nangarhar Province	N/A	No	No	Yes	No	Yes	No	No	Yes	Yes	No	Yes	Yes	No
AF001_132_D0	N/A	N/A	Yes	Run3	384	Afghanistan	Afghanistan	Nangarhar Province	N/A	No	No	Yes	No	Yes	No	No	Yes	Yes	No	Yes	Yes	No
AF001_134_D0	N/A	N/A	Yes	Run3	384	Afghanistan	Afghanistan	Nangarhar Province	N/A	No	No	Yes	No	Yes	No	No	Yes	Yes	No	No	Yes	No
AF001_136_D0	N/A	N/A	Yes	Run3	384	Afghanistan	Afghanistan	Nangarhar Province	N/A	No	No	Yes	No	Yes	No	No	Yes	Yes	No	No	Yes	No
AF001_141_D0	N/A	N/A	Yes	Run3	384	Afghanistan	Afghanistan	Nangarhar Province	N/A	No	No	Yes	No	Yes	No	No	Yes	Yes	No	Yes	Yes	No
AF001_142_D0	N/A	N/A	Yes	Run3	384	Afghanistan	Afghanistan	Nangarhar Province	N/A	No	No	Yes	No	Yes	No	No	Yes	Yes	No	No	Yes	No
AF001_146_D0	N/A	N/A	Yes	Run3	384	Afghanistan	Afghanistan	Nangarhar Province	N/A	No	No	Yes	No	Yes	No	No	Yes	Yes	No	No	Yes	No
AF001_147_D0	N/A	N/A	Yes	Run3	384	Afghanistan	Afghanistan	Nangarhar Province	N/A	No	No	Yes	No	Yes	No	No	Yes	Yes	No	Yes	Yes	No
AF001_149_D0	N/A	N/A	Yes	Run3	384	Afghanistan	Afghanistan	Nangarhar Province	N/A	No	No	Yes	No	Yes	No	No	Yes	Yes	No	Yes	Yes	No
AF001_151_D0	N/A	N/A	Yes	Run3	384	Afghanistan	Afghanistan	Nangarhar Province	N/A	No	No	Yes	No	Yes	No	No	Yes	Yes	No	Yes	Yes	No
AF001_154_D0	N/A	N/A	Yes	Run3	384	Afghanistan	Afghanistan	Nangarhar Province	N/A	No	No	Yes	No	Yes	No	No	Yes	Yes	No	No	Yes	No
AF001_156_D0	N/A	N/A	Yes	Run3	384	Afghanistan	Afghanistan	Nangarhar Province	N/A	No	No	Yes	No	Yes	No	No	Yes	Yes	No	No	Yes	No
AF001_157_D0	N/A	N/A	Yes	Run3	384	Afghanistan	Afghanistan	Nangarhar Province	N/A	No	No	Yes	No	Yes	No	No	Yes	Yes	No	Yes	Yes	No
AF001_158_D0	N/A	N/A	Yes	Run3	384	Afghanistan	Afghanistan	Nangarhar Province	N/A	No	No	Yes	No	Yes	No	No	Yes	Yes	No	Yes	Yes	No
AF001_159_D0	N/A	N/A	Yes	Run3	384	Afghanistan	Afghanistan	Nangarhar Province	N/A	No	No	Yes	No	Yes	No	No	Yes	Yes	No	Yes	Yes	No
AF001_161_D0	N/A	N/A	Yes	Run3	384	Afghanistan	Afghanistan	Nangarhar Province	N/A	No	No	Yes	No	Yes	No	No	Yes	Yes	No	No	Yes	No
AF001_162_D0	N/A	N/A	Yes	Run3	384	Afghanistan	Afghanistan	Nangarhar Province	N/A	No	No	Yes	No	Yes	No	No	Yes	Yes	No	Yes	Yes	No
AF001_165_D0	N/A	N/A	Yes	Run3	384	Afghanistan	Afghanistan	Nangarhar Province	N/A	No	No	Yes	No	Yes	No	No	Yes	Yes	No	No	Yes	No
AF001_166_D0	N/A	N/A	Yes	Run3	384	Afghanistan	Afghanistan	Nangarhar Province	N/A	No	No	Yes	No	Yes	No	No	Yes	Yes	No	No	Yes	No
AF001_167_D0	N/A	N/A	Yes	Run3	384	Afghanistan	Afghanistan	Nangarhar Province	N/A	No	No	Yes	No	Yes	No	No	Yes	Yes	No	No	Yes	No
AF001_172_D0	N/A	N/A	Yes	Run3	384	Afghanistan	Afghanistan	Nangarhar Province	N/A	No	No	Yes	No	Yes	No	No	Yes	Yes	No	No	Yes	No
AF001_175_D0	N/A	N/A	Yes	Run3	384	Afghanistan	Afghanistan	Nangarhar Province	N/A	No	No	Yes	No	Yes	No	No	Yes	Yes	No	Yes	Yes	No
AF001_176_D0	N/A	N/A	Yes	Run3	384	Afghanistan	Afghanistan	Nangarhar Province	N/A	No	No	Yes	No	Yes	No	No	Yes	Yes	No	No	Yes	No
AF001_181_D0	N/A	N/A	Yes	Run3	384	Afghanistan	Afghanistan	Nangarhar Province	N/A	No	No	Yes	No	Yes	No	No	Yes	Yes	No	Yes	Yes	No
AF001_182_D0	N/A	N/A	Yes	Run3	384	Afghanistan	Afghanistan	Nangarhar Province	N/A	No	No	Yes	No	Yes	No	No	Yes	Yes	No	Yes	Yes	No
AF001_184_D0	N/A	N/A	Yes	Run3	384	Afghanistan	Afghanistan	Nangarhar Province	N/A	No	No	Yes	No	Yes	No	No	Yes	Yes	No	No	Yes	No
AF001_188_D0	N/A	N/A	Yes	Run3	384	Afghanistan	Afghanistan	Nangarhar Province	N/A	No	No	Yes	No	Yes	No	No	Yes	Yes	No	No	Yes	No
AF001_189_D0	N/A	N/A	Yes	Run3	384	Afghanistan	Afghanistan	Nangarhar Province	N/A	No	No	Yes	No	Yes	No	No	Yes	Yes	No	Yes	Yes	No
AF001_192_D0	N/A	N/A	Yes	Run3	384	Afghanistan	Afghanistan	Nangarhar Province	N/A	No	No	Yes	No	Yes	No	No	Yes	Yes	No	Yes	Yes	No
AF001_195_D0	N/A	N/A	Yes	Run3	384	Afghanistan	Afghanistan	Nangarhar Province	N/A	No	No	Yes	No	Yes	No	No	Yes	Yes	No	Yes	Yes	No
AF001_196_D0	N/A	N/A	Yes	Run3	384	Afghanistan	Afghanistan	Nangarhar Province	N/A	No	No	Yes	No	Yes	No	No	Yes	Yes	No	No	Yes	No
AF001_197_D0	N/A	N/A	Yes	Run3	384	Afghanistan	Afghanistan	Nangarhar Province	N/A	No	No	Yes	No	Yes	No	No	Yes	Yes	No	Yes	Yes	No
AF001_199_D0	N/A	N/A	Yes	Run3	384	Afghanistan	Afghanistan	Nangarhar Province	N/A	No	No	Yes	No	Yes	No	No	Yes	Yes	No	Yes	Yes	No
AF001_200_D0	N/A	N/A	Yes	Run3	384	Afghanistan	Afghanistan	Nangarhar Province	N/A	No	No	Yes	No	Yes	No	No	Yes	Yes	No	No	Yes	No
AF001_205_D0	N/A	N/A	Yes	Run3	384	Afghanistan	Afghanistan	Nangarhar Province	N/A	No	No	Yes	No	Yes	No	No	Yes	Yes	No	Yes	Yes	No
AF001_206_D0	N/A	N/A	Yes	Run3	384	Afghanistan	Afghanistan	Nangarhar Province	N/A	No	No	Yes	No	Yes	No	No	Yes	Yes	No	No	Yes	No
AF001_208_D0	N/A	N/A	Yes	Run3	384	Afghanistan	Afghanistan	Nangarhar Province	N/A	No	No	Yes	No	Yes	No	No	Yes	Yes	No	No	Yes	No
AF001_210_D0	N/A	N/A	Yes	Run3	384	Afghanistan	Afghanistan	Nangarhar Province	N/A	No	No	Yes	No	Yes	No	No	Yes	Yes	No	No	Yes	No
AF001_214_D0	N/A	N/A	Yes	Run3	384	Afghanistan	Afghanistan	Nangarhar Province	N/A	No	No	Yes	No	Yes	No	No	Yes	Yes	No	Yes	Yes	No
AF001_216_D0	N/A	N/A	Yes	Run3	384	Afghanistan	Afghanistan	Nangarhar Province	N/A	No	No	Yes	No	Yes	No	No	Yes	Yes	No	No	Yes	No
AF001_217_D0	N/A	N/A	Yes	Run3	384	Afghanistan	Afghanistan	Nangarhar Province	N/A	No	No	Yes	No	Yes	No	No	Yes	Yes	No	No	Yes	No
AF001_219_D0	N/A	N/A	Yes	Run3	384	Afghanistan	Afghanistan	Nangarhar Province	N/A	No	No	Yes	No	Yes	No	No	Yes	Yes	No	No	Yes	No
AF001_220_D0	N/A	N/A	Yes	Run3	384	Afghanistan	Afghanistan	Nangarhar Province	N/A	No	No	Yes	No	Yes	No	No	Yes	Yes	No	Yes	Yes	No
AF001_222_D0	N/A	N/A	Yes	Run3	384	Afghanistan	Afghanistan	Nangarhar Province	N/A	No	No	Yes	No	Yes	No	No	Yes	Yes	No	No	Yes	No
AF001_223_D0	N/A	N/A	Yes	Run3	384	Afghanistan	Afghanistan	Nangarhar Province	N/A	No	No	Yes	No	Yes	No	No	Yes	Yes	No	Yes	Yes	No
AF001_224_D0	N/A	N/A	Yes	Run3	384	Afghanistan	Afghanistan	Nangarhar Province	N/A	No	No	Yes	No	Yes	No	No	Yes	Yes	No	Yes	Yes	No
AF001_225_D0	N/A	N/A	Yes	Run3	384	Afghanistan	Afghanistan	Nangarhar Province	N/A	No	No	Yes	No	Yes	No	No	Yes	Yes	No	Yes	Yes	No
AF001_227_D0	N/A	N/A	Yes	Run3	384	Afghanistan	Afghanistan	Nangarhar Province	N/A	No	No	Yes	No	Yes	No	No	Yes	Yes	No	No	Yes	No
AF001_228_D0	N/A	N/A	Yes	Run3	384	Afghanistan	Afghanistan	Nangarhar Province	N/A	No	No	Yes	No	Yes	No	No	Yes	Yes	No	No	Yes	No
AF001_229_D0	N/A	N/A	Yes	Run3	384	Afghanistan	Afghanistan	Nangarhar Province	N/A	No	No	Yes	No	Yes	No	No	Yes	Yes	No	No	Yes	No
AF001_230_D0	N/A	N/A	Yes	Run3	384	Afghanistan	Afghanistan	Nangarhar Province	N/A	No	No	Yes	No	Yes	No	No	Yes	Yes	No	No	Yes	No
AF001_232_D0	N/A	N/A	Yes	Run3	384	Afghanistan	Afghanistan	Nangarhar Province	N/A	No	No	Yes	No	Yes	No	No	Yes	Yes	No	Yes	Yes	No
AF001_233_D0	N/A	N/A	Yes	Run3	384	Afghanistan	Afghanistan	Nangarhar Province	N/A	No	No	Yes	No	Yes	No	No	Yes	Yes	No	No	Yes	No
AF001_234_D0	N/A	N/A	Yes	Run3	384	Afghanistan	Afghanistan	Nangarhar Province	N/A	No	No	Yes	No	Yes	No	No	Yes	Yes	No	No	Yes	No
AF001_235_D0	N/A	N/A	Yes	Run3	384	Afghanistan	Afghanistan	Nangarhar Province	N/A	No	No	Yes	No	Yes	No	No	Yes	Yes	No	Yes	Yes	No
AF001_237_D0	N/A	N/A	Yes	Run3	384	Afghanistan	Afghanistan	Nangarhar Province	N/A	No	No	Yes	No	Yes	No	No	Yes	Yes	No	No	Yes	No
AF001_238_D0	N/A	N/A	Yes	Run3	384	Afghanistan	Afghanistan	Nangarhar Province	N/A	No	No	Yes	No	Yes	No	No	Yes	Yes	No	Yes	Yes	No
AF001_240_D0	N/A	N/A	Yes	Run3	384	Afghanistan	Afghanistan	Nangarhar Province	N/A	No	No	Yes	No	Yes	No	No	Yes	Yes	No	No	Yes	No
AF001_248_D0	N/A	N/A	Yes	Run3	384	Afghanistan	Afghanistan	Nangarhar Province	N/A	No	No	Yes	No	Yes	No	No	Yes	Yes	No	Yes	Yes	No
AF001_249_D0	N/A	N/A	Yes	Run3	384	Afghanistan	Afghanistan	Nangarhar Province	N/A	No	No	Yes	No	Yes	No	No	Yes	Yes	No	No	Yes	No
AF001_250_D0	N/A	N/A	Yes	Run3	384	Afghanistan	Afghanistan	Nangarhar Province	N/A	No	No	Yes	No	Yes	No	No	Yes	Yes	No	Yes	Yes	No
AF001_251_D0	N/A	N/A	Yes	Run3	384	Afghanistan	Afghanistan	Nangarhar Province	N/A	No	No	Yes	No	Yes	No	No	Yes	Yes	No	No	Yes	No
AF001_252_D0	N/A	N/A	Yes	Run3	384	Afghanistan	Afghanistan	Nangarhar Province	N/A	No	No	Yes	No	Yes	No	No	Yes	Yes	No	Yes	Yes	No
AF001_253_D0	N/A	N/A	Yes	Run3	384	Afghanistan	Afghanistan	Nangarhar Province	N/A	No	No	Yes	No	Yes	No	No	Yes	Yes	No	Yes	Yes	No
AF001_254_D0	N/A	N/A	Yes	Run3	384	Afghanistan	Afghanistan	Nangarhar Province	N/A	No	No	Yes	No	Yes	No	No	Yes	Yes	No	Yes	Yes	No
AF001_255_D0	N/A	N/A	Yes	Run3	384	Afghanistan	Afghanistan	Nangarhar Province	N/A	No	No	Yes	No	Yes	No	No	Yes	Yes	No	No	Yes	No
AF001_257_D0	N/A	N/A	Yes	Run3	384	Afghanistan	Afghanistan	Nangarhar Province	N/A	No	No	Yes	No	Yes	No	No	Yes	Yes	No	No	Yes	No
AF001_258_D0	N/A	N/A	Yes	Run3	384	Afghanistan	Afghanistan	Nangarhar Province	N/A	No	No	Yes	No	Yes	No	No	Yes	Yes	No	No	Yes	No
AF001_260_D0	N/A	N/A	Yes	Run3	384	Afghanistan	Afghanistan	Nangarhar Province	N/A	No	No	Yes	No	Yes	No	No	Yes	Yes	No	No	Yes	No
AF001_261_D0	N/A	N/A	Yes	Run3	384	Afghanistan	Afghanistan	Nangarhar Province	N/A	No	No	Yes	No	Yes	No	No	Yes	Yes	No	No	Yes	No
AF001_262_D0	N/A	N/A	Yes	Run3	384	Afghanistan	Afghanistan	Nangarhar Province	N/A	No	No	Yes	No	Yes	No	No	Yes	Yes	No	Yes	Yes	No
AF001_263_D0	N/A	N/A	Yes	Run3	384	Afghanistan	Afghanistan	Nangarhar Province	N/A	No	No	Yes	No	Yes	No	No	Yes	Yes	No	Yes	Yes	No
AF001_273_D0	N/A	N/A	Yes	Run3	384	Afghanistan	Afghanistan	Nangarhar Province	N/A	No	No	Yes	No	Yes	No	No	Yes	Yes	No	Yes	Yes	No
AF001_274_D0	N/A	N/A	Yes	Run3	384	Afghanistan	Afghanistan	Nangarhar Province	N/A	No	No	Yes	No	Yes	No	No	Yes	Yes	No	Yes	Yes	No
AF001_275_D0	N/A	N/A	Yes	Run3	384	Afghanistan	Afghanistan	Nangarhar Province	N/A	No	No	Yes	No	Yes	No	No	Yes	Yes	No	No	Yes	No
AF001_276_D0	N/A	N/A	Yes	Run3	384	Afghanistan	Afghanistan	Nangarhar Province	N/A	No	No	Yes	No	Yes	No	No	Yes	Yes	No	No	Yes	No
AF001_277_D0	N/A	N/A	Yes	Run3	384	Afghanistan	Afghanistan	Nangarhar Province	N/A	No	No	Yes	No	Yes	No	No	Yes	Yes	No	No	Yes	No
AF001_278_D0	N/A	N/A	Yes	Run3	384	Afghanistan	Afghanistan	Nangarhar Province	N/A	No	No	Yes	No	Yes	No	No	Yes	Yes	No	No	Yes	No
AF001_279_D0	N/A	N/A	Yes	Run3	384	Afghanistan	Afghanistan	Nangarhar Province	N/A	No	No	Yes	No	Yes	No	No	Yes	Yes	No	No	Yes	No
AF001_280_D0	N/A	N/A	Yes	Run3	384	Afghanistan	Afghanistan	Nangarhar Province	N/A	No	No	Yes	No	Yes	No	No	Yes	Yes	No	Yes	Yes	No
AF001_281_D0	N/A	N/A	Yes	Run3	384	Afghanistan	Afghanistan	Nangarhar Province	N/A	No	No	Yes	No	Yes	No	No	Yes	Yes	No	No	Yes	No
AF001_282_D0	N/A	N/A	Yes	Run3	384	Afghanistan	Afghanistan	Nangarhar Province	N/A	No	No	Yes	No	Yes	No	No	Yes	Yes	No	Yes	Yes	No
AF001_283_D0	N/A	N/A	Yes	Run3	384	Afghanistan	Afghanistan	Nangarhar Province	N/A	No	No	Yes	No	Yes	No	No	Yes	Yes	No	No	Yes	No
AF001_284_D0	N/A	N/A	Yes	Run3	384	Afghanistan	Afghanistan	Nangarhar Province	N/A	No	No	Yes	No	Yes	No	No	Yes	Yes	No	Yes	Yes	No
AF001_285_D0	N/A	N/A	Yes	Run3	384	Afghanistan	Afghanistan	Nangarhar Province	N/A	No	No	Yes	No	Yes	No	No	Yes	Yes	No	No	Yes	No
AF001_287_D0	N/A	N/A	Yes	Run3	384	Afghanistan	Afghanistan	Nangarhar Province	N/A	No	No	Yes	No	Yes	No	No	Yes	Yes	No	No	Yes	No
AF001_291_D0	N/A	N/A	Yes	Run3	384	Afghanistan	Afghanistan	Nangarhar Province	N/A	No	No	Yes	No	Yes	No	No	Yes	Yes	No	Yes	Yes	No
AF001_293_D0	N/A	N/A	Yes	Run3	384	Afghanistan	Afghanistan	Nangarhar Province	N/A	No	No	Yes	No	Yes	No	No	Yes	Yes	No	No	Yes	No
AF001_294_D0	N/A	N/A	Yes	Run3	384	Afghanistan	Afghanistan	Nangarhar Province	N/A	No	No	Yes	No	Yes	No	No	Yes	Yes	No	Yes	Yes	No
AF001_296_D0	N/A	N/A	Yes	Run3	384	Afghanistan	Afghanistan	Nangarhar Province	N/A	No	No	Yes	No	Yes	No	No	Yes	Yes	No	Yes	Yes	No
AF001_297_D0	N/A	N/A	Yes	Run3	384	Afghanistan	Afghanistan	Nangarhar Province	N/A	No	No	Yes	No	Yes	No	No	Yes	Yes	No	Yes	Yes	No
AF001_298_D0	N/A	N/A	Yes	Run3	384	Afghanistan	Afghanistan	Nangarhar Province	N/A	No	No	Yes	No	Yes	No	No	Yes	Yes	No	Yes	Yes	No
AF001_300_D0	N/A	N/A	Yes	Run3	384	Afghanistan	Afghanistan	Nangarhar Province	N/A	No	No	Yes	No	Yes	No	No	Yes	Yes	No	Yes	Yes	No
AF001_302_D0	N/A	N/A	Yes	Run3	384	Afghanistan	Afghanistan	Nangarhar Province	N/A	No	No	Yes	No	Yes	No	No	Yes	Yes	No	No	Yes	No
AF001_303_D0	N/A	N/A	Yes	Run3	384	Afghanistan	Afghanistan	Nangarhar Province	N/A	No	No	Yes	No	Yes	No	No	Yes	Yes	No	Yes	Yes	No
AF001_304_D0	N/A	N/A	Yes	Run3	384	Afghanistan	Afghanistan	Nangarhar Province	N/A	No	No	Yes	No	Yes	No	No	Yes	Yes	No	No	Yes	No
AF001_307_D0	N/A	N/A	Yes	Run3	384	Afghanistan	Afghanistan	Nangarhar Province	N/A	No	No	Yes	No	Yes	No	No	Yes	Yes	No	Yes	Yes	No
AF001_309_D0	N/A	N/A	Yes	Run3	384	Afghanistan	Afghanistan	Nangarhar Province	N/A	No	No	Yes	No	Yes	No	No	Yes	Yes	No	No	Yes	No
AF001_099_D0	N/A	N/A	Yes	Run3	384	Afghanistan	Afghanistan	Nangarhar Province	N/A	No	No	Yes	No	Yes	No	No	Yes	Yes	No	Yes	Yes	No
AF001_137_D0	N/A	N/A	Yes	Run3	384	Afghanistan	Afghanistan	Nangarhar Province	N/A	Yes	No	No	No	No	No	No	No	No	No	No	No	No
AF001_211_D0	N/A	N/A	Yes	Run3	384	Afghanistan	Afghanistan	Nangarhar Province	N/A	Yes	No	No	No	No	No	No	No	No	No	No	No	No
AF001_221_D0	N/A	N/A	Yes	Run3	384	Afghanistan	Afghanistan	Nangarhar Province	N/A	Yes	No	No	No	No	No	No	No	No	No	No	No	No
AF001_236_D0	N/A	N/A	Yes	Run3	384	Afghanistan	Afghanistan	Nangarhar Province	N/A	Yes	No	No	No	No	No	No	No	No	No	No	No	No
AF001_242_D0	N/A	N/A	Yes	Run3	384	Afghanistan	Afghanistan	Nangarhar Province	N/A	Yes	No	No	No	No	No	No	No	No	No	No	No	No
AF001_125_D0_NV22	N/A	N/A	No	Run2	96	Afghanistan	Afghanistan	Nangarhar Province	N/A	Yes	No	No	No	No	No	No	No	No	No	No	No	No
AF001_171_D0_4-3	N/A	N/A	No	Run4	192	Afghanistan	Afghanistan	Nangarhar Province	N/A	Yes	No	No	No	No	No	No	No	No	No	No	No	No
M004	VVX02319	N/A	Yes	Run3	384	Bangladesh	Bangladesh	Chittagong Division	N/A	No	No	No	No	Yes	No	No	No	No	No	No	No	No
M017	VVX02332	N/A	Yes	Run3	384	Bangladesh	Bangladesh	Chittagong Division	N/A	No	No	No	No	Yes	No	No	No	No	No	No	No	No
M018	VVX02333	N/A	Yes	Run3	384	Bangladesh	Bangladesh	Chittagong Division	N/A	No	No	No	No	Yes	No	No	No	No	No	No	No	No
M019	VVX02334	N/A	Yes	Run3	384	Bangladesh	Bangladesh	Chittagong Division	N/A	No	No	No	No	Yes	No	No	No	No	No	No	No	No
M020	VVX02335	N/A	Yes	Run3	384	Bangladesh	Bangladesh	Chittagong Division	N/A	No	No	No	No	Yes	No	No	No	No	No	No	No	No
05027V-1	PW0039-C	N/A	Yes	Run2	96	Colombia	Colombia	Chocó Department	N/A	No	No	No	No	No	No	No	No	No	No	No	No	No
Pv_Sc_14	N/A	N/A	Yes	Run3	384	Colombia	Colombia	Risaralda Department	N/A	No	No	No	No	Yes	No	No	No	No	No	No	No	No
Pv_Sc_15	N/A	N/A	Yes	Run3	384	Colombia	Colombia	Risaralda Department	N/A	No	No	No	No	Yes	No	No	No	No	No	No	No	No
Pv_Sc_16	N/A	N/A	Yes	Run3	384	Colombia	Colombia	Risaralda Department	N/A	No	No	No	No	Yes	No	No	No	No	No	No	No	No
Pv_Sc_17	N/A	N/A	Yes	Run3	384	Colombia	Colombia	Risaralda Department	N/A	No	No	No	No	Yes	No	No	No	No	No	No	No	No
Pv_Sc_18	N/A	N/A	Yes	Run3	384	Colombia	Colombia	Risaralda Department	N/A	No	No	No	No	Yes	No	No	No	No	No	No	No	No
CQE002	N/A	VVX24822	Yes	Run3	384	Ethiopia	Ethiopia	Gamo Zone	N/A	No	No	Yes	No	Yes	Yes	Yes	Yes	Yes	No	No	Yes	No
CQE003	N/A	VVX24823	Yes	Run3	384	Ethiopia	Ethiopia	Gamo Zone	N/A	No	No	Yes	No	Yes	Yes	Yes	Yes	Yes	No	Yes	Yes	No
CQE004	N/A	VVX24824	Yes	Run3	384	Ethiopia	Ethiopia	Gamo Zone	N/A	No	No	Yes	No	Yes	Yes	Yes	Yes	Yes	No	Yes	Yes	No
CQE006	N/A	VVX24825	Yes	Run3	384	Ethiopia	Ethiopia	Gamo Zone	N/A	No	No	Yes	No	Yes	Yes	Yes	Yes	Yes	No	No	Yes	No
CQE008	N/A	VVX24827	Yes	Run3	384	Ethiopia	Ethiopia	Gamo Zone	N/A	No	No	Yes	No	Yes	Yes	Yes	Yes	Yes	No	Yes	Yes	No
CQE010	N/A	VVX24828	Yes	Run3	384	Ethiopia	Ethiopia	Gamo Zone	N/A	No	No	Yes	No	Yes	Yes	Yes	Yes	Yes	No	Yes	Yes	No
CQE011	N/A	VVX24829	Yes	Run3	384	Ethiopia	Ethiopia	Gamo Zone	N/A	No	No	Yes	No	Yes	Yes	Yes	Yes	Yes	No	No	Yes	No
CQE012	N/A	VVX24830	Yes	Run3	384	Ethiopia	Ethiopia	Gamo Zone	N/A	No	No	Yes	No	Yes	Yes	Yes	Yes	Yes	No	Yes	Yes	No
CQE013	N/A	VVX24831	Yes	Run3	384	Ethiopia	Ethiopia	Gamo Zone	N/A	No	No	Yes	No	Yes	Yes	Yes	Yes	Yes	No	No	Yes	No
CQE016	N/A	VVX24832	Yes	Run3	384	Ethiopia	Ethiopia	Gamo Zone	N/A	No	No	Yes	No	Yes	Yes	Yes	Yes	Yes	No	No	Yes	No
CQE019	N/A	VVX24834	Yes	Run3	384	Ethiopia	Ethiopia	Gamo Zone	N/A	No	No	Yes	No	Yes	Yes	Yes	Yes	Yes	No	No	Yes	No
CQE020	N/A	VVX24835	Yes	Run3	384	Ethiopia	Ethiopia	Gamo Zone	N/A	No	No	Yes	No	Yes	Yes	Yes	Yes	Yes	No	Yes	Yes	No
CQE022	N/A	VVX24837	Yes	Run3	384	Ethiopia	Ethiopia	Gamo Zone	N/A	No	No	Yes	No	Yes	Yes	Yes	Yes	Yes	No	Yes	Yes	No
CQE024	N/A	VVX24838	Yes	Run3	384	Ethiopia	Ethiopia	Gamo Zone	N/A	No	No	Yes	No	Yes	Yes	Yes	Yes	Yes	No	No	Yes	No
CQE025	N/A	VVX24839	Yes	Run3	384	Ethiopia	Ethiopia	Gamo Zone	N/A	No	No	Yes	No	Yes	Yes	Yes	Yes	Yes	No	No	Yes	No
CQE027	N/A	VVX24840	Yes	Run3	384	Ethiopia	Ethiopia	Gamo Zone	N/A	No	No	Yes	No	Yes	Yes	Yes	Yes	Yes	No	Yes	Yes	No
CQE029	N/A	VVX24841	Yes	Run3	384	Ethiopia	Ethiopia	Gamo Zone	N/A	No	No	Yes	No	Yes	Yes	Yes	Yes	Yes	No	No	Yes	No
CQE030	N/A	VVX24842	Yes	Run3	384	Ethiopia	Ethiopia	Gamo Zone	N/A	No	No	Yes	No	Yes	Yes	Yes	Yes	Yes	No	No	Yes	No
CQE031	N/A	VVX24843	Yes	Run3	384	Ethiopia	Ethiopia	Gamo Zone	N/A	No	No	Yes	No	Yes	Yes	Yes	Yes	Yes	No	Yes	Yes	No
CQE034	N/A	VVX24847	Yes	Run3	384	Ethiopia	Ethiopia	Gamo Zone	N/A	No	No	Yes	No	Yes	Yes	Yes	Yes	Yes	No	Yes	Yes	No
CQE035	N/A	VVX24848	Yes	Run3	384	Ethiopia	Ethiopia	Gamo Zone	N/A	No	No	Yes	No	Yes	Yes	Yes	Yes	Yes	No	Yes	Yes	No
CQE036	N/A	VVX24849	Yes	Run3	384	Ethiopia	Ethiopia	Gamo Zone	N/A	No	No	Yes	No	Yes	Yes	Yes	Yes	Yes	No	Yes	Yes	No
CQE038	N/A	VVX24851	Yes	Run3	384	Ethiopia	Ethiopia	Gamo Zone	N/A	No	No	Yes	No	Yes	Yes	Yes	Yes	Yes	No	Yes	Yes	No
CQE041	N/A	VVX24852	Yes	Run3	384	Ethiopia	Ethiopia	Gamo Zone	N/A	No	No	Yes	No	Yes	Yes	Yes	Yes	Yes	No	No	Yes	No
CQE042	N/A	VVX24853	Yes	Run3	384	Ethiopia	Ethiopia	Gamo Zone	N/A	No	No	Yes	No	Yes	Yes	Yes	Yes	Yes	No	Yes	Yes	No
CQE043	N/A	VVX24854	Yes	Run3	384	Ethiopia	Ethiopia	Gamo Zone	N/A	No	No	Yes	No	Yes	Yes	Yes	Yes	Yes	No	Yes	Yes	No
CQE048	N/A	VVX24857	Yes	Run3	384	Ethiopia	Ethiopia	Gamo Zone	N/A	No	No	Yes	No	Yes	Yes	Yes	Yes	Yes	No	No	Yes	No
CQE053	N/A	VVX24858	Yes	Run3	384	Ethiopia	Ethiopia	Gamo Zone	N/A	No	No	Yes	No	Yes	Yes	Yes	Yes	Yes	No	No	Yes	No
CQE057	N/A	VVX24860	Yes	Run3	384	Ethiopia	Ethiopia	Gamo Zone	N/A	No	No	Yes	No	Yes	Yes	Yes	Yes	Yes	No	No	Yes	No
CQE059	N/A	VVX24862	Yes	Run3	384	Ethiopia	Ethiopia	Gamo Zone	N/A	No	No	Yes	No	Yes	Yes	Yes	Yes	Yes	No	Yes	Yes	No
CQE060	N/A	VVX24863	Yes	Run3	384	Ethiopia	Ethiopia	Gamo Zone	N/A	No	No	Yes	No	Yes	Yes	Yes	Yes	Yes	No	No	Yes	No
CQE062	N/A	VVX24864	Yes	Run3	384	Ethiopia	Ethiopia	Gamo Zone	N/A	No	No	Yes	No	Yes	Yes	Yes	Yes	Yes	No	No	Yes	No
CQE063	N/A	VVX24865	Yes	Run3	384	Ethiopia	Ethiopia	Gamo Zone	N/A	No	No	Yes	No	Yes	Yes	Yes	Yes	Yes	No	No	Yes	No
CQE064	N/A	VVX24866	Yes	Run3	384	Ethiopia	Ethiopia	Gamo Zone	N/A	No	No	Yes	No	Yes	Yes	Yes	Yes	Yes	No	Yes	Yes	No
CQE067	N/A	VVX24867	Yes	Run3	384	Ethiopia	Ethiopia	Gamo Zone	N/A	No	No	Yes	No	Yes	Yes	Yes	Yes	Yes	No	Yes	Yes	No
CQE069	N/A	VVX24868	Yes	Run3	384	Ethiopia	Ethiopia	Gamo Zone	N/A	No	No	Yes	No	Yes	Yes	Yes	Yes	Yes	No	No	Yes	No
CQE070	N/A	VVX24869	Yes	Run3	384	Ethiopia	Ethiopia	Gamo Zone	N/A	No	No	Yes	No	Yes	Yes	Yes	Yes	Yes	No	No	Yes	No
CQE071	N/A	VVX24871	Yes	Run3	384	Ethiopia	Ethiopia	Gamo Zone	N/A	No	No	Yes	No	Yes	Yes	Yes	Yes	Yes	No	No	Yes	No
CQE072	N/A	VVX24872	Yes	Run3	384	Ethiopia	Ethiopia	Gamo Zone	N/A	No	No	Yes	No	Yes	Yes	Yes	Yes	Yes	No	Yes	Yes	No
CQE077	N/A	VVX24875	Yes	Run3	384	Ethiopia	Ethiopia	Gamo Zone	N/A	No	No	Yes	No	Yes	Yes	Yes	Yes	Yes	No	No	Yes	No
CQE080	N/A	VVX24878	Yes	Run3	384	Ethiopia	Ethiopia	Gamo Zone	N/A	No	No	Yes	No	Yes	Yes	Yes	Yes	Yes	No	Yes	Yes	No
CQE081	N/A	VVX24879	Yes	Run3	384	Ethiopia	Ethiopia	Gamo Zone	N/A	No	No	Yes	No	Yes	Yes	Yes	Yes	Yes	No	No	Yes	No
CQE082	N/A	VVX24880	Yes	Run3	384	Ethiopia	Ethiopia	Gamo Zone	N/A	No	No	Yes	No	Yes	Yes	Yes	Yes	Yes	No	No	Yes	No
CQE083	N/A	VVX24881	Yes	Run3	384	Ethiopia	Ethiopia	Gamo Zone	N/A	No	No	Yes	No	Yes	Yes	Yes	Yes	Yes	No	No	Yes	No
CQE085	N/A	VVX24882	Yes	Run3	384	Ethiopia	Ethiopia	Gamo Zone	N/A	No	No	Yes	No	Yes	Yes	Yes	Yes	Yes	No	Yes	Yes	No
CQE086	N/A	VVX24883	Yes	Run3	384	Ethiopia	Ethiopia	Gamo Zone	N/A	No	No	Yes	No	Yes	Yes	Yes	Yes	Yes	No	No	Yes	No
CQE090	N/A	VVX24884	Yes	Run3	384	Ethiopia	Ethiopia	Gamo Zone	N/A	No	No	Yes	No	Yes	Yes	Yes	Yes	Yes	No	Yes	Yes	No
CQE092	N/A	VVX24885	Yes	Run3	384	Ethiopia	Ethiopia	Gamo Zone	N/A	No	No	Yes	No	Yes	Yes	Yes	Yes	Yes	No	No	Yes	No
CQE093	N/A	VVX24886	Yes	Run3	384	Ethiopia	Ethiopia	Gamo Zone	N/A	No	No	Yes	No	Yes	Yes	Yes	Yes	Yes	No	No	Yes	No
CQE097	N/A	VVX24889	Yes	Run3	384	Ethiopia	Ethiopia	Gamo Zone	N/A	No	No	Yes	No	Yes	Yes	Yes	Yes	Yes	No	No	Yes	No
CQE007	N/A	N/A	Yes	Run3	384	Ethiopia	Ethiopia	Gamo Zone	N/A	No	No	Yes	No	Yes	No	No	Yes	Yes	No	Yes	Yes	No
CQE018	N/A	N/A	Yes	Run3	384	Ethiopia	Ethiopia	Gamo Zone	N/A	No	No	Yes	No	Yes	No	No	Yes	Yes	No	No	Yes	No
CQE021	N/A	N/A	Yes	Run3	384	Ethiopia	Ethiopia	Gamo Zone	N/A	No	No	Yes	No	Yes	No	No	Yes	Yes	No	Yes	Yes	No
CQE032	N/A	N/A	Yes	Run3	384	Ethiopia	Ethiopia	Gamo Zone	N/A	No	No	Yes	No	Yes	No	No	Yes	Yes	No	Yes	Yes	No
CQE033	N/A	N/A	Yes	Run3	384	Ethiopia	Ethiopia	Gamo Zone	N/A	No	No	Yes	No	Yes	No	No	Yes	Yes	No	No	Yes	No
CQE037	N/A	N/A	Yes	Run3	384	Ethiopia	Ethiopia	Gamo Zone	N/A	No	No	Yes	No	Yes	No	No	Yes	Yes	No	Yes	Yes	No
CQE044	N/A	N/A	Yes	Run3	384	Ethiopia	Ethiopia	Gamo Zone	N/A	No	No	Yes	No	Yes	No	No	Yes	Yes	No	Yes	Yes	No
CQE047	N/A	N/A	Yes	Run3	384	Ethiopia	Ethiopia	Gamo Zone	N/A	No	No	Yes	No	Yes	No	No	Yes	Yes	No	No	Yes	No
CQE056	N/A	N/A	Yes	Run3	384	Ethiopia	Ethiopia	Gamo Zone	N/A	No	No	Yes	No	Yes	No	No	Yes	Yes	No	No	Yes	No
CQE058	N/A	N/A	Yes	Run3	384	Ethiopia	Ethiopia	Gamo Zone	N/A	No	No	Yes	No	Yes	No	No	Yes	Yes	No	Yes	Yes	No
CQE075	N/A	N/A	Yes	Run3	384	Ethiopia	Ethiopia	Gamo Zone	N/A	No	No	Yes	No	Yes	No	No	Yes	Yes	No	Yes	Yes	No
CQE076	N/A	N/A	Yes	Run3	384	Ethiopia	Ethiopia	Gamo Zone	N/A	No	No	Yes	No	Yes	No	No	Yes	Yes	No	No	Yes	No
CQE094	N/A	N/A	Yes	Run3	384	Ethiopia	Ethiopia	Gamo Zone	N/A	No	No	Yes	No	Yes	No	No	Yes	Yes	No	No	Yes	No
CQE096	N/A	N/A	Yes	Run3	384	Ethiopia	Ethiopia	Gamo Zone	N/A	No	No	Yes	No	Yes	No	No	Yes	Yes	No	No	Yes	No
CQE098	N/A	N/A	Yes	Run3	384	Ethiopia	Ethiopia	Gamo Zone	N/A	No	No	Yes	No	Yes	No	No	Yes	Yes	No	No	Yes	No
CQE099	N/A	N/A	Yes	Run3	384	Ethiopia	Ethiopia	Gamo Zone	N/A	No	No	Yes	No	Yes	No	No	Yes	Yes	No	No	Yes	No
CQE001	N/A	N/A	Yes	Run3	384	Ethiopia	Ethiopia	Gamo Zone	N/A	No	No	Yes	No	Yes	No	No	Yes	Yes	No	No	Yes	No
CQE079	N/A	N/A	Yes	Run3	384	Ethiopia	Ethiopia	Gamo Zone	N/A	Yes	No	No	No	No	No	No	No	No	No	No	No	No
CQE070_R	N/A	N/A	No	Run3	384	Ethiopia	Ethiopia	Gamo Zone	N/A	Yes	No	No	No	No	No	No	No	No	No	No	No	No
100526_D0	N/A	N/A	Yes	Run5	384	Ethiopia-RCT	Ethiopia	East Shewa Zone	N/A	No	No	Yes	No	Yes	No	No	Yes	Yes	Yes	Yes	Yes	No
100629_D0H0	N/A	N/A	Yes	Run6	384	Ethiopia-RCT	Ethiopia	East Shewa Zone	N/A	No	No	Yes	No	Yes	No	No	Yes	Yes	Yes	Yes	Yes	No
101222_D0	N/A	N/A	Yes	Run5	384	Ethiopia-RCT	Ethiopia	East Shewa Zone	N/A	No	No	Yes	No	Yes	No	No	Yes	Yes	Yes	No	Yes	No
101531_D0	N/A	N/A	Yes	Run5	384	Ethiopia-RCT	Ethiopia	East Shewa Zone	N/A	No	No	Yes	No	Yes	No	No	Yes	Yes	Yes	No	Yes	No
101634_D0	N/A	N/A	Yes	Run5	384	Ethiopia-RCT	Ethiopia	East Shewa Zone	N/A	No	No	Yes	No	Yes	No	No	Yes	Yes	Yes	No	Yes	No
101840_D0	N/A	N/A	Yes	Run5	384	Ethiopia-RCT	Ethiopia	East Shewa Zone	N/A	No	No	Yes	No	Yes	No	No	Yes	Yes	Yes	Yes	Yes	No
102330_D0	N/A	N/A	Yes	Run5	384	Ethiopia-RCT	Ethiopia	East Shewa Zone	N/A	No	No	Yes	No	Yes	No	No	Yes	Yes	Yes	No	Yes	No
102433_D0	N/A	N/A	Yes	Run5	384	Ethiopia-RCT	Ethiopia	East Shewa Zone	N/A	No	No	Yes	No	Yes	No	No	Yes	Yes	Yes	No	Yes	No
102536_D0	N/A	N/A	Yes	Run5	384	Ethiopia-RCT	Ethiopia	East Shewa Zone	N/A	No	No	Yes	No	Yes	No	No	Yes	Yes	Yes	Yes	Yes	No
102948_D0H0	N/A	N/A	Yes	Run6	384	Ethiopia-RCT	Ethiopia	East Shewa Zone	N/A	No	No	Yes	No	Yes	No	No	Yes	Yes	Yes	Yes	Yes	No
103129_D0	N/A	N/A	Yes	Run5	384	Ethiopia-RCT	Ethiopia	East Shewa Zone	N/A	No	No	Yes	No	Yes	No	No	Yes	Yes	Yes	No	Yes	No
103232_D0	N/A	N/A	Yes	Run5	384	Ethiopia-RCT	Ethiopia	East Shewa Zone	N/A	No	No	Yes	No	Yes	No	No	Yes	Yes	Yes	Yes	Yes	No
103335_D0	N/A	N/A	Yes	Run5	384	Ethiopia-RCT	Ethiopia	East Shewa Zone	N/A	No	No	Yes	No	Yes	No	No	Yes	Yes	No	Yes	Yes	No
103747_D0	N/A	N/A	Yes	Run5	384	Ethiopia-RCT	Ethiopia	East Shewa Zone	N/A	No	No	Yes	No	Yes	No	No	Yes	Yes	Yes	No	Yes	No
104031_D0	N/A	N/A	Yes	Run5	384	Ethiopia-RCT	Ethiopia	East Shewa Zone	N/A	No	No	Yes	No	Yes	No	No	Yes	Yes	No	Yes	Yes	No
104237_D0	N/A	N/A	Yes	Run5	384	Ethiopia-RCT	Ethiopia	East Shewa Zone	N/A	No	No	Yes	No	Yes	No	No	Yes	Yes	Yes	No	Yes	No
104340_D0	N/A	N/A	Yes	Run5	384	Ethiopia-RCT	Ethiopia	East Shewa Zone	N/A	No	No	Yes	No	Yes	No	No	Yes	Yes	Yes	No	Yes	No
104443_D0	N/A	N/A	Yes	Run5	384	Ethiopia-RCT	Ethiopia	East Shewa Zone	N/A	No	No	Yes	No	Yes	No	No	Yes	Yes	Yes	No	Yes	No
105036_D0	N/A	N/A	Yes	Run5	384	Ethiopia-RCT	Ethiopia	East Shewa Zone	N/A	No	No	Yes	No	Yes	No	No	Yes	Yes	Yes	No	Yes	No
105139_D0	N/A	N/A	Yes	Run5	384	Ethiopia-RCT	Ethiopia	East Shewa Zone	N/A	No	No	Yes	No	Yes	No	No	Yes	Yes	Yes	No	Yes	No
105551_D0	N/A	N/A	Yes	Run5	384	Ethiopia-RCT	Ethiopia	East Shewa Zone	N/A	No	No	Yes	No	Yes	No	No	Yes	Yes	Yes	Yes	Yes	No
105654_D0	N/A	N/A	Yes	Run5	384	Ethiopia-RCT	Ethiopia	East Shewa Zone	N/A	No	No	Yes	No	Yes	No	No	Yes	Yes	Yes	No	Yes	No
105757_D0	N/A	N/A	Yes	Run5	384	Ethiopia-RCT	Ethiopia	East Shewa Zone	N/A	No	No	Yes	No	Yes	No	No	Yes	Yes	Yes	No	Yes	No
106144_D0	N/A	N/A	Yes	Run5	384	Ethiopia-RCT	Ethiopia	East Shewa Zone	N/A	No	No	Yes	No	Yes	No	No	Yes	Yes	Yes	Yes	Yes	No
106350_D0	N/A	N/A	Yes	Run5	384	Ethiopia-RCT	Ethiopia	East Shewa Zone	N/A	No	No	Yes	No	Yes	No	No	Yes	Yes	No	No	Yes	No
106453_D0	N/A	N/A	Yes	Run5	384	Ethiopia-RCT	Ethiopia	East Shewa Zone	N/A	No	No	Yes	No	Yes	No	No	Yes	Yes	Yes	Yes	Yes	No
106659_D0	N/A	N/A	Yes	Run5	384	Ethiopia-RCT	Ethiopia	East Shewa Zone	N/A	No	No	Yes	No	Yes	No	No	Yes	Yes	Yes	Yes	Yes	No
106865_D0	N/A	N/A	Yes	Run5	384	Ethiopia-RCT	Ethiopia	East Shewa Zone	N/A	No	No	Yes	No	Yes	No	No	Yes	Yes	Yes	Yes	Yes	No
107458_D0H0	N/A	N/A	Yes	Run6	384	Ethiopia-RCT	Ethiopia	East Shewa Zone	N/A	No	No	Yes	No	Yes	No	No	Yes	Yes	Yes	Yes	Yes	No
107664_D0	N/A	N/A	Yes	Run5	384	Ethiopia-RCT	Ethiopia	East Shewa Zone	N/A	No	No	Yes	No	Yes	No	No	Yes	Yes	Yes	No	Yes	No
107973_D0	N/A	N/A	Yes	Run5	384	Ethiopia-RCT	Ethiopia	East Shewa Zone	N/A	No	No	Yes	No	Yes	No	No	Yes	Yes	Yes	No	Yes	No
108772_D0	N/A	N/A	Yes	Run5	384	Ethiopia-RCT	Ethiopia	East Shewa Zone	N/A	No	No	Yes	No	Yes	No	No	Yes	Yes	Yes	No	Yes	No
109365_D0	N/A	N/A	Yes	Run5	384	Ethiopia-RCT	Ethiopia	East Shewa Zone	N/A	No	No	Yes	No	Yes	No	No	Yes	Yes	No	No	Yes	No
109468_D0	N/A	N/A	Yes	Run5	384	Ethiopia-RCT	Ethiopia	East Shewa Zone	N/A	No	No	Yes	No	Yes	No	No	Yes	Yes	No	Yes	Yes	No
109674_D0	N/A	N/A	Yes	Run5	384	Ethiopia-RCT	Ethiopia	East Shewa Zone	N/A	No	No	Yes	No	Yes	No	No	Yes	Yes	No	Yes	Yes	No
109777_D0H0	N/A	N/A	Yes	Run6	384	Ethiopia-RCT	Ethiopia	East Shewa Zone	N/A	No	No	Yes	No	Yes	No	No	Yes	Yes	No	Yes	Yes	No
109880_D0H0	N/A	N/A	Yes	Run6	384	Ethiopia-RCT	Ethiopia	East Shewa Zone	N/A	No	No	Yes	No	Yes	No	No	Yes	Yes	Yes	Yes	Yes	No
109983_D0	N/A	N/A	Yes	Run5	384	Ethiopia-RCT	Ethiopia	East Shewa Zone	N/A	No	No	Yes	No	Yes	No	No	Yes	Yes	Yes	Yes	Yes	No
110327_D0	N/A	N/A	Yes	Run5	384	Ethiopia-RCT	Ethiopia	East Shewa Zone	N/A	No	No	Yes	No	Yes	No	No	Yes	Yes	Yes	No	Yes	No
110430_D0	N/A	N/A	Yes	Run5	384	Ethiopia-RCT	Ethiopia	East Shewa Zone	N/A	No	No	Yes	No	Yes	No	No	Yes	Yes	Yes	Yes	Yes	No
110842_D0	N/A	N/A	Yes	Run5	384	Ethiopia-RCT	Ethiopia	East Shewa Zone	N/A	No	No	Yes	No	Yes	No	No	Yes	Yes	Yes	Yes	Yes	No
111126_D0	N/A	N/A	Yes	Run5	384	Ethiopia-RCT	Ethiopia	East Shewa Zone	N/A	No	No	Yes	No	Yes	No	No	Yes	Yes	Yes	Yes	Yes	No
111229_D0	N/A	N/A	Yes	Run5	384	Ethiopia-RCT	Ethiopia	East Shewa Zone	N/A	No	No	Yes	No	Yes	No	No	Yes	Yes	No	No	Yes	No
111435_D0	N/A	N/A	Yes	Run5	384	Ethiopia-RCT	Ethiopia	East Shewa Zone	N/A	No	No	Yes	No	Yes	No	No	Yes	Yes	Yes	Yes	Yes	No
111950_D0	N/A	N/A	Yes	Run5	384	Ethiopia-RCT	Ethiopia	East Shewa Zone	N/A	No	No	Yes	No	Yes	No	No	Yes	Yes	Yes	No	Yes	No
112028_D0	N/A	N/A	Yes	Run5	384	Ethiopia-RCT	Ethiopia	East Shewa Zone	N/A	No	No	Yes	No	Yes	No	No	Yes	Yes	Yes	Yes	Yes	No
112234_D0	N/A	N/A	Yes	Run5	384	Ethiopia-RCT	Ethiopia	East Shewa Zone	N/A	No	No	Yes	No	Yes	No	No	Yes	Yes	Yes	No	Yes	No
112646_D0	N/A	N/A	Yes	Run5	384	Ethiopia-RCT	Ethiopia	East Shewa Zone	N/A	No	No	Yes	No	Yes	No	No	Yes	Yes	Yes	No	Yes	No
112749_D0	N/A	N/A	Yes	Run5	384	Ethiopia-RCT	Ethiopia	East Shewa Zone	N/A	No	No	Yes	No	Yes	No	No	Yes	Yes	No	Yes	Yes	No
112955_D0	N/A	N/A	Yes	Run5	384	Ethiopia-RCT	Ethiopia	East Shewa Zone	N/A	No	No	Yes	No	Yes	No	No	Yes	Yes	No	Yes	Yes	No
113033_D0	N/A	N/A	Yes	Run5	384	Ethiopia-RCT	Ethiopia	East Shewa Zone	N/A	No	No	Yes	No	Yes	No	No	Yes	Yes	No	No	Yes	No
113445_D0	N/A	N/A	Yes	Run5	384	Ethiopia-RCT	Ethiopia	East Shewa Zone	N/A	No	No	Yes	No	Yes	No	No	Yes	Yes	No	No	Yes	No
113651_D0	N/A	N/A	Yes	Run5	384	Ethiopia-RCT	Ethiopia	East Shewa Zone	N/A	No	No	Yes	No	Yes	No	No	Yes	Yes	Yes	Yes	Yes	No
114965_D0	N/A	N/A	Yes	Run5	384	Ethiopia-RCT	Ethiopia	East Shewa Zone	N/A	No	No	Yes	No	Yes	No	No	Yes	Yes	No	No	Yes	No
115043_D0	N/A	N/A	Yes	Run5	384	Ethiopia-RCT	Ethiopia	East Shewa Zone	N/A	No	No	Yes	No	Yes	No	No	Yes	Yes	Yes	Yes	Yes	No
115455_D0	N/A	N/A	Yes	Run5	384	Ethiopia-RCT	Ethiopia	East Shewa Zone	N/A	No	No	Yes	No	Yes	No	No	Yes	Yes	Yes	No	Yes	No
115867_D0	N/A	N/A	Yes	Run5	384	Ethiopia-RCT	Ethiopia	East Shewa Zone	N/A	No	No	Yes	No	Yes	No	No	Yes	Yes	No	No	Yes	No
115970_D0	N/A	N/A	Yes	Run5	384	Ethiopia-RCT	Ethiopia	East Shewa Zone	N/A	No	No	Yes	No	Yes	No	No	Yes	Yes	Yes	Yes	Yes	No
116357_D0	N/A	N/A	Yes	Run5	384	Ethiopia-RCT	Ethiopia	East Shewa Zone	N/A	No	No	Yes	No	Yes	No	No	Yes	Yes	No	Yes	Yes	No
116460_D0	N/A	N/A	Yes	Run5	384	Ethiopia-RCT	Ethiopia	East Shewa Zone	N/A	No	No	Yes	No	Yes	No	No	Yes	Yes	Yes	Yes	Yes	No
116769_D0	N/A	N/A	Yes	Run5	384	Ethiopia-RCT	Ethiopia	East Shewa Zone	N/A	No	No	Yes	No	Yes	No	No	Yes	Yes	No	Yes	Yes	No
117156_D0	N/A	N/A	Yes	Run5	384	Ethiopia-RCT	Ethiopia	East Shewa Zone	N/A	No	No	Yes	No	Yes	No	No	Yes	Yes	Yes	No	Yes	No
117259_D0	N/A	N/A	Yes	Run5	384	Ethiopia-RCT	Ethiopia	East Shewa Zone	N/A	No	No	Yes	No	Yes	No	No	Yes	Yes	No	No	Yes	No
117362_D0	N/A	N/A	Yes	Run5	384	Ethiopia-RCT	Ethiopia	East Shewa Zone	N/A	No	No	Yes	No	Yes	No	No	Yes	Yes	No	Yes	Yes	No
117465_D0	N/A	N/A	Yes	Run5	384	Ethiopia-RCT	Ethiopia	East Shewa Zone	N/A	No	No	Yes	No	Yes	No	No	Yes	Yes	Yes	No	Yes	No
117980_D0	N/A	N/A	Yes	Run5	384	Ethiopia-RCT	Ethiopia	East Shewa Zone	N/A	No	No	Yes	No	Yes	No	No	Yes	Yes	Yes	Yes	Yes	No
118367_D0	N/A	N/A	Yes	Run5	384	Ethiopia-RCT	Ethiopia	East Shewa Zone	N/A	No	No	Yes	No	Yes	No	No	Yes	Yes	Yes	Yes	Yes	No
118573_D0	N/A	N/A	Yes	Run5	384	Ethiopia-RCT	Ethiopia	East Shewa Zone	N/A	No	No	Yes	No	Yes	No	No	Yes	Yes	Yes	No	Yes	No
118779_D0	N/A	N/A	Yes	Run5	384	Ethiopia-RCT	Ethiopia	East Shewa Zone	N/A	No	No	Yes	No	Yes	No	No	Yes	Yes	Yes	No	Yes	No
118882_D0	N/A	N/A	Yes	Run5	384	Ethiopia-RCT	Ethiopia	East Shewa Zone	N/A	No	No	Yes	No	Yes	No	No	Yes	Yes	Yes	No	Yes	No
119166_D0	N/A	N/A	Yes	Run5	384	Ethiopia-RCT	Ethiopia	East Shewa Zone	N/A	No	No	Yes	No	Yes	No	No	Yes	Yes	Yes	Yes	Yes	No
119269_D0	N/A	N/A	Yes	Run5	384	Ethiopia-RCT	Ethiopia	East Shewa Zone	N/A	No	No	Yes	No	Yes	No	No	Yes	Yes	Yes	No	Yes	No
119372_D0	N/A	N/A	Yes	Run5	384	Ethiopia-RCT	Ethiopia	East Shewa Zone	N/A	No	No	Yes	No	Yes	No	No	Yes	Yes	Yes	No	Yes	No
119681_D0	N/A	N/A	Yes	Run5	384	Ethiopia-RCT	Ethiopia	East Shewa Zone	N/A	No	No	Yes	No	Yes	No	No	Yes	Yes	No	No	Yes	No
119887_D0	N/A	N/A	Yes	Run5	384	Ethiopia-RCT	Ethiopia	East Shewa Zone	N/A	No	No	Yes	No	Yes	No	No	Yes	Yes	Yes	Yes	Yes	No
120025_D0	N/A	N/A	Yes	Run5	384	Ethiopia-RCT	Ethiopia	East Shewa Zone	N/A	No	No	Yes	No	Yes	No	No	Yes	Yes	Yes	Yes	Yes	No
120643_D0	N/A	N/A	Yes	Run5	384	Ethiopia-RCT	Ethiopia	East Shewa Zone	N/A	No	No	Yes	No	Yes	No	No	Yes	Yes	Yes	Yes	Yes	No
120746_D0	N/A	N/A	Yes	Run5	384	Ethiopia-RCT	Ethiopia	East Shewa Zone	N/A	No	No	Yes	No	Yes	No	No	Yes	Yes	Yes	Yes	Yes	No
121442_D0	N/A	N/A	Yes	Run5	384	Ethiopia-RCT	Ethiopia	East Shewa Zone	N/A	No	No	Yes	No	Yes	No	No	Yes	Yes	Yes	No	Yes	No
121751_D0	N/A	N/A	Yes	Run5	384	Ethiopia-RCT	Ethiopia	East Shewa Zone	N/A	No	No	Yes	No	Yes	No	No	Yes	Yes	Yes	Yes	Yes	No
122035_D0	N/A	N/A	Yes	Run5	384	Ethiopia-RCT	Ethiopia	East Shewa Zone	N/A	No	No	Yes	No	Yes	No	No	Yes	Yes	Yes	No	Yes	No
122138_D0	N/A	N/A	Yes	Run5	384	Ethiopia-RCT	Ethiopia	East Shewa Zone	N/A	No	No	Yes	No	Yes	No	No	Yes	Yes	Yes	Yes	Yes	No
123246_D0	N/A	N/A	Yes	Run5	384	Ethiopia-RCT	Ethiopia	East Shewa Zone	N/A	No	No	Yes	No	Yes	No	No	Yes	Yes	Yes	No	Yes	No
123555_M3D21	N/A	N/A	Yes	Run5	384	Ethiopia-RCT	Ethiopia	East Shewa Zone	N/A	No	No	Yes	No	Yes	No	No	Yes	Yes	No	Yes	Yes	No
123761_D0	N/A	N/A	Yes	Run5	384	Ethiopia-RCT	Ethiopia	East Shewa Zone	N/A	No	No	Yes	No	Yes	No	No	Yes	Yes	No	No	Yes	No
123967_D0	N/A	N/A	Yes	Run5	384	Ethiopia-RCT	Ethiopia	East Shewa Zone	N/A	No	No	Yes	No	Yes	No	No	Yes	Yes	No	Yes	Yes	No
124148_D0	N/A	N/A	Yes	Run5	384	Ethiopia-RCT	Ethiopia	East Shewa Zone	N/A	No	No	Yes	No	Yes	No	No	Yes	Yes	Yes	Yes	Yes	No
124251_D0	N/A	N/A	Yes	Run5	384	Ethiopia-RCT	Ethiopia	East Shewa Zone	N/A	No	No	Yes	No	Yes	No	No	Yes	Yes	Yes	No	Yes	No
124457_D0	N/A	N/A	Yes	Run5	384	Ethiopia-RCT	Ethiopia	East Shewa Zone	N/A	No	No	Yes	No	Yes	No	No	Yes	Yes	No	No	Yes	No
124560_D0	N/A	N/A	Yes	Run5	384	Ethiopia-RCT	Ethiopia	East Shewa Zone	N/A	No	No	Yes	No	Yes	No	No	Yes	Yes	No	No	Yes	No
124972_D0	N/A	N/A	Yes	Run5	384	Ethiopia-RCT	Ethiopia	East Shewa Zone	N/A	No	No	Yes	No	Yes	No	No	Yes	Yes	Yes	Yes	Yes	No
125050_D0	N/A	N/A	Yes	Run5	384	Ethiopia-RCT	Ethiopia	East Shewa Zone	N/A	No	No	Yes	No	Yes	No	No	Yes	Yes	Yes	No	Yes	No
125153_D0	N/A	N/A	Yes	Run5	384	Ethiopia-RCT	Ethiopia	East Shewa Zone	N/A	No	No	Yes	No	Yes	No	No	Yes	Yes	No	No	Yes	No
125565_D0	N/A	N/A	Yes	Run5	384	Ethiopia-RCT	Ethiopia	East Shewa Zone	N/A	No	No	Yes	No	Yes	No	No	Yes	Yes	Yes	No	Yes	No
125771_D0	N/A	N/A	Yes	Run5	384	Ethiopia-RCT	Ethiopia	East Shewa Zone	N/A	No	No	Yes	No	Yes	No	No	Yes	Yes	No	No	Yes	No
126055_D0	N/A	N/A	Yes	Run6	384	Ethiopia-RCT	Ethiopia	East Shewa Zone	N/A	No	No	Yes	No	Yes	No	No	Yes	Yes	No	Yes	Yes	No
126158_D0	N/A	N/A	Yes	Run6	384	Ethiopia-RCT	Ethiopia	East Shewa Zone	N/A	No	No	Yes	No	Yes	No	No	Yes	Yes	No	No	Yes	No
126261_D0	N/A	N/A	Yes	Run6	384	Ethiopia-RCT	Ethiopia	East Shewa Zone	N/A	No	No	Yes	No	Yes	No	No	Yes	Yes	No	Yes	Yes	No
127369_D0	N/A	N/A	Yes	Run6	384	Ethiopia-RCT	Ethiopia	East Shewa Zone	N/A	No	No	Yes	No	Yes	No	No	Yes	Yes	Yes	No	Yes	No
127987_D0	N/A	N/A	Yes	Run6	384	Ethiopia-RCT	Ethiopia	East Shewa Zone	N/A	No	No	Yes	No	Yes	No	No	Yes	Yes	Yes	No	Yes	No
128168_D0	N/A	N/A	Yes	Run6	384	Ethiopia-RCT	Ethiopia	East Shewa Zone	N/A	No	No	Yes	No	Yes	No	No	Yes	Yes	Yes	Yes	Yes	No
128271_D0	N/A	N/A	Yes	Run6	384	Ethiopia-RCT	Ethiopia	East Shewa Zone	N/A	No	No	Yes	No	Yes	No	No	Yes	Yes	Yes	Yes	Yes	No
128374_D0	N/A	N/A	Yes	Run6	384	Ethiopia-RCT	Ethiopia	East Shewa Zone	N/A	No	No	Yes	No	Yes	No	No	Yes	Yes	No	No	Yes	No
130238_D0	N/A	N/A	Yes	Run6	384	Ethiopia-RCT	Ethiopia	East Shewa Zone	N/A	No	No	Yes	No	Yes	No	No	Yes	Yes	Yes	No	Yes	No
200125_D0	N/A	N/A	Yes	Run6	384	Ethiopia-RCT	Ethiopia	East Shewa Zone	N/A	No	No	Yes	No	Yes	No	No	Yes	Yes	Yes	Yes	Yes	No
200434_D0	N/A	N/A	Yes	Run6	384	Ethiopia-RCT	Ethiopia	East Shewa Zone	N/A	No	No	Yes	No	Yes	No	No	Yes	Yes	No	Yes	Yes	No
200743_D0	N/A	N/A	Yes	Run6	384	Ethiopia-RCT	Ethiopia	East Shewa Zone	N/A	No	No	Yes	No	Yes	No	No	Yes	Yes	No	Yes	Yes	No
200846_D0	N/A	N/A	Yes	Run6	384	Ethiopia-RCT	Ethiopia	East Shewa Zone	N/A	No	No	Yes	No	Yes	No	No	Yes	Yes	No	No	Yes	No
200949_D0	N/A	N/A	Yes	Run6	384	Ethiopia-RCT	Ethiopia	East Shewa Zone	N/A	No	No	Yes	No	Yes	No	No	Yes	Yes	Yes	Yes	Yes	No
201130_D0	N/A	N/A	Yes	Run6	384	Ethiopia-RCT	Ethiopia	East Shewa Zone	N/A	No	No	Yes	No	Yes	No	No	Yes	Yes	Yes	No	Yes	No
201336_D0	N/A	N/A	Yes	Run6	384	Ethiopia-RCT	Ethiopia	East Shewa Zone	N/A	No	No	Yes	No	Yes	No	No	Yes	Yes	Yes	No	Yes	No
201439_D0	N/A	N/A	Yes	Run6	384	Ethiopia-RCT	Ethiopia	East Shewa Zone	N/A	No	No	Yes	No	Yes	No	No	Yes	Yes	Yes	Yes	Yes	No
201542_D0	N/A	N/A	Yes	Run6	384	Ethiopia-RCT	Ethiopia	East Shewa Zone	N/A	No	No	Yes	No	Yes	No	No	Yes	Yes	Yes	No	Yes	No
201645_D0	N/A	N/A	Yes	Run6	384	Ethiopia-RCT	Ethiopia	East Shewa Zone	N/A	No	No	Yes	No	Yes	No	No	Yes	Yes	Yes	Yes	Yes	No
201954_D0	N/A	N/A	Yes	Run6	384	Ethiopia-RCT	Ethiopia	East Shewa Zone	N/A	No	No	Yes	No	Yes	No	No	Yes	Yes	No	No	Yes	No
202032_D0	N/A	N/A	Yes	Run6	384	Ethiopia-RCT	Ethiopia	East Shewa Zone	N/A	No	No	Yes	No	Yes	No	No	Yes	Yes	Yes	No	Yes	No
202135_D0	N/A	N/A	Yes	Run6	384	Ethiopia-RCT	Ethiopia	East Shewa Zone	N/A	No	No	Yes	No	Yes	No	No	Yes	Yes	Yes	No	Yes	No
202444_D0	N/A	N/A	Yes	Run6	384	Ethiopia-RCT	Ethiopia	East Shewa Zone	N/A	No	No	Yes	No	Yes	No	No	Yes	Yes	Yes	No	Yes	No
202547_D0	N/A	N/A	Yes	Run6	384	Ethiopia-RCT	Ethiopia	East Shewa Zone	N/A	No	No	Yes	No	Yes	No	No	Yes	Yes	No	No	Yes	No
202650_D0	N/A	N/A	Yes	Run6	384	Ethiopia-RCT	Ethiopia	East Shewa Zone	N/A	No	No	Yes	No	Yes	No	No	Yes	Yes	No	No	Yes	No
202959_D0	N/A	N/A	Yes	Run6	384	Ethiopia-RCT	Ethiopia	East Shewa Zone	N/A	No	No	Yes	No	Yes	No	No	Yes	Yes	No	Yes	Yes	No
203243_D0	N/A	N/A	Yes	Run6	384	Ethiopia-RCT	Ethiopia	East Shewa Zone	N/A	No	No	Yes	No	Yes	No	No	Yes	Yes	No	No	Yes	No
203449_D0	N/A	N/A	Yes	Run6	384	Ethiopia-RCT	Ethiopia	East Shewa Zone	N/A	No	No	Yes	No	Yes	No	No	Yes	Yes	Yes	Yes	Yes	No
203552_D0	N/A	N/A	Yes	Run6	384	Ethiopia-RCT	Ethiopia	East Shewa Zone	N/A	No	No	Yes	No	Yes	No	No	Yes	Yes	Yes	Yes	Yes	No
203964_D0	N/A	N/A	Yes	Run6	384	Ethiopia-RCT	Ethiopia	East Shewa Zone	N/A	No	No	Yes	No	Yes	No	No	Yes	Yes	Yes	No	Yes	No
204660_D0	N/A	N/A	Yes	Run6	384	Ethiopia-RCT	Ethiopia	East Shewa Zone	N/A	No	No	Yes	No	Yes	No	No	Yes	Yes	No	Yes	Yes	No
204763_D0	N/A	N/A	Yes	Run6	384	Ethiopia-RCT	Ethiopia	East Shewa Zone	N/A	No	No	Yes	No	Yes	No	No	Yes	Yes	No	No	Yes	No
205047_D0	N/A	N/A	Yes	Run6	384	Ethiopia-RCT	Ethiopia	East Shewa Zone	N/A	No	No	Yes	No	Yes	No	No	Yes	Yes	Yes	Yes	Yes	No
205459_D0	N/A	N/A	Yes	Run6	384	Ethiopia-RCT	Ethiopia	East Shewa Zone	N/A	No	No	Yes	No	Yes	No	No	Yes	Yes	No	No	Yes	No
205562_D0	N/A	N/A	Yes	Run6	384	Ethiopia-RCT	Ethiopia	East Shewa Zone	N/A	No	No	Yes	No	Yes	No	No	Yes	Yes	Yes	No	Yes	No
205665_D0	N/A	N/A	Yes	Run6	384	Ethiopia-RCT	Ethiopia	East Shewa Zone	N/A	No	No	Yes	No	Yes	No	No	Yes	Yes	Yes	No	Yes	No
205768_D0	N/A	N/A	Yes	Run6	384	Ethiopia-RCT	Ethiopia	East Shewa Zone	N/A	No	No	Yes	No	Yes	No	No	Yes	Yes	No	Yes	Yes	No
206258_D0	N/A	N/A	Yes	Run6	384	Ethiopia-RCT	Ethiopia	East Shewa Zone	N/A	No	No	Yes	No	Yes	No	No	Yes	Yes	Yes	Yes	Yes	No
206464_D0	N/A	N/A	Yes	Run6	384	Ethiopia-RCT	Ethiopia	East Shewa Zone	N/A	No	No	Yes	No	Yes	No	No	Yes	Yes	No	No	Yes	No
206567_D0	N/A	N/A	Yes	Run6	384	Ethiopia-RCT	Ethiopia	East Shewa Zone	N/A	No	No	Yes	No	Yes	No	No	Yes	Yes	No	Yes	Yes	No
207160_D0	N/A	N/A	Yes	Run6	384	Ethiopia-RCT	Ethiopia	East Shewa Zone	N/A	No	No	Yes	No	Yes	No	No	Yes	Yes	No	Yes	Yes	No
207469_D0	N/A	N/A	Yes	Run6	384	Ethiopia-RCT	Ethiopia	East Shewa Zone	N/A	No	No	Yes	No	Yes	No	No	Yes	Yes	No	No	Yes	No
207778_D0	N/A	N/A	Yes	Run6	384	Ethiopia-RCT	Ethiopia	East Shewa Zone	N/A	No	No	Yes	No	Yes	No	No	Yes	Yes	Yes	No	Yes	No
208062_D0	N/A	N/A	Yes	Run6	384	Ethiopia-RCT	Ethiopia	East Shewa Zone	N/A	No	No	Yes	No	Yes	No	No	Yes	Yes	No	Yes	Yes	No
208371_D0	N/A	N/A	Yes	Run6	384	Ethiopia-RCT	Ethiopia	East Shewa Zone	N/A	No	No	Yes	No	Yes	No	No	Yes	Yes	Yes	Yes	Yes	No
208474_D0	N/A	N/A	Yes	Run6	384	Ethiopia-RCT	Ethiopia	East Shewa Zone	N/A	No	No	Yes	No	Yes	No	No	Yes	Yes	Yes	Yes	Yes	No
208886_D0	N/A	N/A	Yes	Run6	384	Ethiopia-RCT	Ethiopia	East Shewa Zone	N/A	No	No	Yes	No	Yes	No	No	Yes	Yes	No	No	Yes	No
209170_D0	N/A	N/A	Yes	Run6	384	Ethiopia-RCT	Ethiopia	East Shewa Zone	N/A	No	No	Yes	No	Yes	No	No	Yes	Yes	Yes	Yes	Yes	No
209376_D0	N/A	N/A	Yes	Run6	384	Ethiopia-RCT	Ethiopia	East Shewa Zone	N/A	No	No	Yes	No	Yes	No	No	Yes	Yes	Yes	No	Yes	No
209479_D0	N/A	N/A	Yes	Run6	384	Ethiopia-RCT	Ethiopia	East Shewa Zone	N/A	No	No	Yes	No	Yes	No	No	Yes	Yes	No	Yes	Yes	No
209685_D0	N/A	N/A	Yes	Run6	384	Ethiopia-RCT	Ethiopia	East Shewa Zone	N/A	No	No	Yes	No	Yes	No	No	Yes	Yes	No	No	Yes	No
103438_D0	N/A	N/A	Yes	Run5	384	Ethiopia-RCT	Ethiopia	East Shewa Zone	N/A	Yes	No	No	No	No	No	No	No	No	No	No	No	No
105963_D0	N/A	N/A	Yes	Run5	384	Ethiopia-RCT	Ethiopia	East Shewa Zone	N/A	Yes	No	No	No	No	No	No	No	No	No	No	No	No
107458_M9	N/A	N/A	No	Run5	384	Ethiopia-RCT	Ethiopia	East Shewa Zone	N/A	Yes	No	No	No	No	No	No	No	No	Yes	No	No	No
112234_M5	N/A	N/A	No	Run5	384	Ethiopia-RCT	Ethiopia	East Shewa Zone	N/A	Yes	No	No	No	No	No	No	No	No	Yes	No	No	No
208474_D35	N/A	N/A	No	Run6	384	Ethiopia-RCT	Ethiopia	East Shewa Zone	N/A	Yes	No	No	No	No	No	No	No	No	Yes	No	No	No
103335_M3	N/A	N/A	Yes	Run5	384	Ethiopia-RCT	Ethiopia	East Shewa Zone	N/A	No	No	No	No	No	No	No	No	No	Yes	No	No	No
105963_M2	N/A	N/A	Yes	Run5	384	Ethiopia-RCT	Ethiopia	East Shewa Zone	N/A	No	No	No	No	No	No	No	No	No	Yes	No	No	No
106350_M5D5	N/A	N/A	Yes	Run5	384	Ethiopia-RCT	Ethiopia	East Shewa Zone	N/A	No	No	No	No	No	No	No	No	No	Yes	No	No	No
109468_D42	N/A	N/A	Yes	Run5	384	Ethiopia-RCT	Ethiopia	East Shewa Zone	N/A	No	No	No	No	No	No	No	No	No	Yes	No	No	No
119681_M2	N/A	N/A	Yes	Run5	384	Ethiopia-RCT	Ethiopia	East Shewa Zone	N/A	No	No	No	No	No	No	No	No	No	Yes	No	No	No
123761_M1	N/A	N/A	Yes	Run5	384	Ethiopia-RCT	Ethiopia	East Shewa Zone	N/A	No	No	No	No	No	No	No	No	No	Yes	No	No	No
124457_M3	N/A	N/A	Yes	Run5	384	Ethiopia-RCT	Ethiopia	East Shewa Zone	N/A	No	No	No	No	No	No	No	No	No	Yes	No	No	No
124560_D35	N/A	N/A	Yes	Run5	384	Ethiopia-RCT	Ethiopia	East Shewa Zone	N/A	No	No	No	No	No	No	No	No	No	Yes	No	No	No
126158_D42	N/A	N/A	Yes	Run6	384	Ethiopia-RCT	Ethiopia	East Shewa Zone	N/A	No	No	No	No	No	No	No	No	No	Yes	No	No	No
126261_M1D9	N/A	N/A	Yes	Run6	384	Ethiopia-RCT	Ethiopia	East Shewa Zone	N/A	No	No	No	No	No	No	No	No	No	Yes	No	No	No
206464_M2	N/A	N/A	Yes	Run6	384	Ethiopia-RCT	Ethiopia	East Shewa Zone	N/A	No	No	No	No	No	No	No	No	No	Yes	No	No	No
207469_M4	N/A	N/A	Yes	Run6	384	Ethiopia-RCT	Ethiopia	East Shewa Zone	N/A	No	No	No	No	No	No	No	No	No	Yes	No	No	No
100526_D21	N/A	N/A	No	Run5	384	Ethiopia-RCT	Ethiopia	East Shewa Zone	N/A	No	No	No	No	No	No	No	No	No	Yes	No	No	No
100629_M5	N/A	N/A	No	Run5	384	Ethiopia-RCT	Ethiopia	East Shewa Zone	N/A	No	No	No	No	No	No	No	No	No	Yes	No	No	No
101222_M3	N/A	N/A	No	Run5	384	Ethiopia-RCT	Ethiopia	East Shewa Zone	N/A	No	No	No	No	No	No	No	No	No	Yes	No	No	No
101531_D51	N/A	N/A	No	Run5	384	Ethiopia-RCT	Ethiopia	East Shewa Zone	N/A	No	No	No	No	No	No	No	No	No	Yes	No	No	No
101634_D56	N/A	N/A	No	Run5	384	Ethiopia-RCT	Ethiopia	East Shewa Zone	N/A	No	No	No	No	No	No	No	No	No	Yes	No	No	No
101840_D44	N/A	N/A	No	Run5	384	Ethiopia-RCT	Ethiopia	East Shewa Zone	N/A	No	No	No	No	No	No	No	No	No	Yes	No	No	No
102330_D26	N/A	N/A	No	Run5	384	Ethiopia-RCT	Ethiopia	East Shewa Zone	N/A	No	No	No	No	No	No	No	No	No	Yes	No	No	No
102433_M1	N/A	N/A	No	Run5	384	Ethiopia-RCT	Ethiopia	East Shewa Zone	N/A	No	No	No	No	No	No	No	No	No	Yes	No	No	No
102536_D59	N/A	N/A	No	Run5	384	Ethiopia-RCT	Ethiopia	East Shewa Zone	N/A	No	No	No	No	No	No	No	No	No	Yes	No	No	No
102948_D34	N/A	N/A	No	Run5	384	Ethiopia-RCT	Ethiopia	East Shewa Zone	N/A	No	No	No	No	No	No	No	No	No	Yes	No	No	No
103129_D58	N/A	N/A	No	Run5	384	Ethiopia-RCT	Ethiopia	East Shewa Zone	N/A	No	No	No	No	No	No	No	No	No	Yes	No	No	No
103232_D50	N/A	N/A	No	Run5	384	Ethiopia-RCT	Ethiopia	East Shewa Zone	N/A	No	No	No	No	No	No	No	No	No	Yes	No	No	No
103335_M5	N/A	N/A	No	Run5	384	Ethiopia-RCT	Ethiopia	East Shewa Zone	N/A	No	No	No	No	No	No	No	No	No	Yes	No	No	No
103747_D35	N/A	N/A	No	Run5	384	Ethiopia-RCT	Ethiopia	East Shewa Zone	N/A	No	No	No	No	No	No	No	No	No	Yes	No	No	No
104237_M4D15	N/A	N/A	No	Run5	384	Ethiopia-RCT	Ethiopia	East Shewa Zone	N/A	No	No	No	No	No	No	No	No	No	Yes	No	No	No
104340_M1	N/A	N/A	No	Run5	384	Ethiopia-RCT	Ethiopia	East Shewa Zone	N/A	No	No	No	No	No	No	No	No	No	Yes	No	No	No
104443_D41	N/A	N/A	No	Run5	384	Ethiopia-RCT	Ethiopia	East Shewa Zone	N/A	No	No	No	No	No	No	No	No	No	Yes	No	No	No
105036_D47	N/A	N/A	No	Run5	384	Ethiopia-RCT	Ethiopia	East Shewa Zone	N/A	No	No	No	No	No	No	No	No	No	Yes	No	No	No
105139_D64	N/A	N/A	No	Run5	384	Ethiopia-RCT	Ethiopia	East Shewa Zone	N/A	No	No	No	No	No	No	No	No	No	Yes	No	No	No
105551_M2	N/A	N/A	No	Run5	384	Ethiopia-RCT	Ethiopia	East Shewa Zone	N/A	No	No	No	No	No	No	No	No	No	Yes	No	No	No
105654_M7	N/A	N/A	No	Run5	384	Ethiopia-RCT	Ethiopia	East Shewa Zone	N/A	No	No	No	No	No	No	No	No	No	Yes	No	No	No
105757_D56	N/A	N/A	No	Run5	384	Ethiopia-RCT	Ethiopia	East Shewa Zone	N/A	No	No	No	No	No	No	No	No	No	Yes	No	No	No
105963_M4	N/A	N/A	No	Run5	384	Ethiopia-RCT	Ethiopia	East Shewa Zone	N/A	No	No	No	No	No	No	No	No	No	Yes	No	No	No
106144_D35	N/A	N/A	No	Run5	384	Ethiopia-RCT	Ethiopia	East Shewa Zone	N/A	No	No	No	No	No	No	No	No	No	Yes	No	No	No
106350_M6D21	N/A	N/A	No	Run5	384	Ethiopia-RCT	Ethiopia	East Shewa Zone	N/A	No	No	No	No	No	No	No	No	No	Yes	No	No	No
106453_D57	N/A	N/A	No	Run5	384	Ethiopia-RCT	Ethiopia	East Shewa Zone	N/A	No	No	No	No	No	No	No	No	No	Yes	No	No	No
106659_D31	N/A	N/A	No	Run5	384	Ethiopia-RCT	Ethiopia	East Shewa Zone	N/A	No	No	No	No	No	No	No	No	No	Yes	No	No	No
106865_D55	N/A	N/A	No	Run5	384	Ethiopia-RCT	Ethiopia	East Shewa Zone	N/A	No	No	No	No	No	No	No	No	No	Yes	No	No	No
107664_M3D19	N/A	N/A	No	Run5	384	Ethiopia-RCT	Ethiopia	East Shewa Zone	N/A	No	No	No	No	No	No	No	No	No	Yes	No	No	No
107973_D49	N/A	N/A	No	Run5	384	Ethiopia-RCT	Ethiopia	East Shewa Zone	N/A	No	No	No	No	No	No	No	No	No	Yes	No	No	No
108772_D32	N/A	N/A	No	Run5	384	Ethiopia-RCT	Ethiopia	East Shewa Zone	N/A	No	No	No	No	No	No	No	No	No	Yes	No	No	No
109468_M2	N/A	N/A	No	Run5	384	Ethiopia-RCT	Ethiopia	East Shewa Zone	N/A	No	No	No	No	No	No	No	No	No	Yes	No	No	No
109880_D35	N/A	N/A	No	Run5	384	Ethiopia-RCT	Ethiopia	East Shewa Zone	N/A	No	No	No	No	No	No	No	No	No	Yes	No	No	No
109983_D28	N/A	N/A	No	Run5	384	Ethiopia-RCT	Ethiopia	East Shewa Zone	N/A	No	No	No	No	No	No	No	No	No	Yes	No	No	No
110327_D28	N/A	N/A	No	Run5	384	Ethiopia-RCT	Ethiopia	East Shewa Zone	N/A	No	No	No	No	No	No	No	No	No	Yes	No	No	No
110430_D42	N/A	N/A	No	Run5	384	Ethiopia-RCT	Ethiopia	East Shewa Zone	N/A	No	No	No	No	No	No	No	No	No	Yes	No	No	No
110842_M1	N/A	N/A	No	Run5	384	Ethiopia-RCT	Ethiopia	East Shewa Zone	N/A	No	No	No	No	No	No	No	No	No	Yes	No	No	No
111126_M6D20	N/A	N/A	No	Run5	384	Ethiopia-RCT	Ethiopia	East Shewa Zone	N/A	No	No	No	No	No	No	No	No	No	Yes	No	No	No
111435_M6	N/A	N/A	No	Run5	384	Ethiopia-RCT	Ethiopia	East Shewa Zone	N/A	No	No	No	No	No	No	No	No	No	Yes	No	No	No
111950_M1D20	N/A	N/A	No	Run5	384	Ethiopia-RCT	Ethiopia	East Shewa Zone	N/A	No	No	No	No	No	No	No	No	No	Yes	No	No	No
112028_M5	N/A	N/A	No	Run5	384	Ethiopia-RCT	Ethiopia	East Shewa Zone	N/A	No	No	No	No	No	No	No	No	No	Yes	No	No	No
112646_D41	N/A	N/A	No	Run5	384	Ethiopia-RCT	Ethiopia	East Shewa Zone	N/A	No	No	No	No	No	No	No	No	No	Yes	No	No	No
113651_M1D4	N/A	N/A	No	Run5	384	Ethiopia-RCT	Ethiopia	East Shewa Zone	N/A	No	No	No	No	No	No	No	No	No	Yes	No	No	No
115043_D42	N/A	N/A	No	Run5	384	Ethiopia-RCT	Ethiopia	East Shewa Zone	N/A	No	No	No	No	No	No	No	No	No	Yes	No	No	No
115455_M1D3	N/A	N/A	No	Run5	384	Ethiopia-RCT	Ethiopia	East Shewa Zone	N/A	No	No	No	No	No	No	No	No	No	Yes	No	No	No
115970_M4D5	N/A	N/A	No	Run5	384	Ethiopia-RCT	Ethiopia	East Shewa Zone	N/A	No	No	No	No	No	No	No	No	No	Yes	No	No	No
116460_D35	N/A	N/A	No	Run5	384	Ethiopia-RCT	Ethiopia	East Shewa Zone	N/A	No	No	No	No	No	No	No	No	No	Yes	No	No	No
117156_D42	N/A	N/A	No	Run5	384	Ethiopia-RCT	Ethiopia	East Shewa Zone	N/A	No	No	No	No	No	No	No	No	No	Yes	No	No	No
117465_M1D24	N/A	N/A	No	Run5	384	Ethiopia-RCT	Ethiopia	East Shewa Zone	N/A	No	No	No	No	No	No	No	No	No	Yes	No	No	No
117980_M1D21	N/A	N/A	No	Run5	384	Ethiopia-RCT	Ethiopia	East Shewa Zone	N/A	No	No	No	No	No	No	No	No	No	Yes	No	No	No
118367_D29	N/A	N/A	No	Run5	384	Ethiopia-RCT	Ethiopia	East Shewa Zone	N/A	No	No	No	No	No	No	No	No	No	Yes	No	No	No
118573_M1D16	N/A	N/A	No	Run5	384	Ethiopia-RCT	Ethiopia	East Shewa Zone	N/A	No	No	No	No	No	No	No	No	No	Yes	No	No	No
118779_M5D19	N/A	N/A	No	Run5	384	Ethiopia-RCT	Ethiopia	East Shewa Zone	N/A	No	No	No	No	No	No	No	No	No	Yes	No	No	No
118882_M1D15	N/A	N/A	No	Run5	384	Ethiopia-RCT	Ethiopia	East Shewa Zone	N/A	No	No	No	No	No	No	No	No	No	Yes	No	No	No
119166_M1D8	N/A	N/A	No	Run5	384	Ethiopia-RCT	Ethiopia	East Shewa Zone	N/A	No	No	No	No	No	No	No	No	No	Yes	No	No	No
119269_M2	N/A	N/A	No	Run5	384	Ethiopia-RCT	Ethiopia	East Shewa Zone	N/A	No	No	No	No	No	No	No	No	No	Yes	No	No	No
119372_M5D23	N/A	N/A	No	Run5	384	Ethiopia-RCT	Ethiopia	East Shewa Zone	N/A	No	No	No	No	No	No	No	No	No	Yes	No	No	No
119681_M3	N/A	N/A	No	Run5	384	Ethiopia-RCT	Ethiopia	East Shewa Zone	N/A	No	No	No	No	No	No	No	No	No	Yes	No	No	No
119887_M3D9	N/A	N/A	No	Run5	384	Ethiopia-RCT	Ethiopia	East Shewa Zone	N/A	No	No	No	No	No	No	No	No	No	Yes	No	No	No
120025_D28	N/A	N/A	No	Run5	384	Ethiopia-RCT	Ethiopia	East Shewa Zone	N/A	No	No	No	No	No	No	No	No	No	Yes	No	No	No
120643_D30	N/A	N/A	No	Run5	384	Ethiopia-RCT	Ethiopia	East Shewa Zone	N/A	No	No	No	No	No	No	No	No	No	Yes	No	No	No
120746_M1	N/A	N/A	No	Run5	384	Ethiopia-RCT	Ethiopia	East Shewa Zone	N/A	No	No	No	No	No	No	No	No	No	Yes	No	No	No
121442_M2D15	N/A	N/A	No	Run5	384	Ethiopia-RCT	Ethiopia	East Shewa Zone	N/A	No	No	No	No	No	No	No	No	No	Yes	No	No	No
121751_M2	N/A	N/A	No	Run5	384	Ethiopia-RCT	Ethiopia	East Shewa Zone	N/A	No	No	No	No	No	No	No	No	No	Yes	No	No	No
122035_M6D5	N/A	N/A	No	Run5	384	Ethiopia-RCT	Ethiopia	East Shewa Zone	N/A	No	No	No	No	No	No	No	No	No	Yes	No	No	No
122138_M6D7	N/A	N/A	No	Run5	384	Ethiopia-RCT	Ethiopia	East Shewa Zone	N/A	No	No	No	No	No	No	No	No	No	Yes	No	No	No
123246_M2	N/A	N/A	No	Run5	384	Ethiopia-RCT	Ethiopia	East Shewa Zone	N/A	No	No	No	No	No	No	No	No	No	Yes	No	No	No
123761_M3D19	N/A	N/A	No	Run5	384	Ethiopia-RCT	Ethiopia	East Shewa Zone	N/A	No	No	No	No	No	No	No	No	No	Yes	No	No	No
124148_D28	N/A	N/A	No	Run5	384	Ethiopia-RCT	Ethiopia	East Shewa Zone	N/A	No	No	No	No	No	No	No	No	No	Yes	No	No	No
124251_D28	N/A	N/A	No	Run5	384	Ethiopia-RCT	Ethiopia	East Shewa Zone	N/A	No	No	No	No	No	No	No	No	No	Yes	No	No	No
124457_M5	N/A	N/A	No	Run5	384	Ethiopia-RCT	Ethiopia	East Shewa Zone	N/A	No	No	No	No	No	No	No	No	No	Yes	No	No	No
124560_M2D18	N/A	N/A	No	Run5	384	Ethiopia-RCT	Ethiopia	East Shewa Zone	N/A	No	No	No	No	No	No	No	No	No	Yes	No	No	No
124972_D35	N/A	N/A	No	Run5	384	Ethiopia-RCT	Ethiopia	East Shewa Zone	N/A	No	No	No	No	No	No	No	No	No	Yes	No	No	No
125050_D28	N/A	N/A	No	Run5	384	Ethiopia-RCT	Ethiopia	East Shewa Zone	N/A	No	No	No	No	No	No	No	No	No	Yes	No	No	No
125565_M8	N/A	N/A	No	Run5	384	Ethiopia-RCT	Ethiopia	East Shewa Zone	N/A	No	No	No	No	No	No	No	No	No	Yes	No	No	No
126158_M2	N/A	N/A	No	Run6	384	Ethiopia-RCT	Ethiopia	East Shewa Zone	N/A	No	No	No	No	No	No	No	No	No	Yes	No	No	No
126261_M4	N/A	N/A	No	Run6	384	Ethiopia-RCT	Ethiopia	East Shewa Zone	N/A	No	No	No	No	No	No	No	No	No	Yes	No	No	No
127369_M5	N/A	N/A	No	Run6	384	Ethiopia-RCT	Ethiopia	East Shewa Zone	N/A	No	No	No	No	No	No	No	No	No	Yes	No	No	No
127987_M5	N/A	N/A	No	Run6	384	Ethiopia-RCT	Ethiopia	East Shewa Zone	N/A	No	No	No	No	No	No	No	No	No	Yes	No	No	No
128168_M2D13	N/A	N/A	No	Run6	384	Ethiopia-RCT	Ethiopia	East Shewa Zone	N/A	No	No	No	No	No	No	No	No	No	Yes	No	No	No
128271_M1	N/A	N/A	No	Run6	384	Ethiopia-RCT	Ethiopia	East Shewa Zone	N/A	No	No	No	No	No	No	No	No	No	Yes	No	No	No
130238_D35	N/A	N/A	No	Run6	384	Ethiopia-RCT	Ethiopia	East Shewa Zone	N/A	No	No	No	No	No	No	No	No	No	Yes	No	No	No
200125_D42	N/A	N/A	No	Run6	384	Ethiopia-RCT	Ethiopia	East Shewa Zone	N/A	No	No	No	No	No	No	No	No	No	Yes	No	No	No
200949_M2D27	N/A	N/A	No	Run6	384	Ethiopia-RCT	Ethiopia	East Shewa Zone	N/A	No	No	No	No	No	No	No	No	No	Yes	No	No	No
201130_D60	N/A	N/A	No	Run6	384	Ethiopia-RCT	Ethiopia	East Shewa Zone	N/A	No	No	No	No	No	No	No	No	No	Yes	No	No	No
201336_M4D12	N/A	N/A	No	Run6	384	Ethiopia-RCT	Ethiopia	East Shewa Zone	N/A	No	No	No	No	No	No	No	No	No	Yes	No	No	No
201439_D39	N/A	N/A	No	Run6	384	Ethiopia-RCT	Ethiopia	East Shewa Zone	N/A	No	No	No	No	No	No	No	No	No	Yes	No	No	No
201542_D21	N/A	N/A	No	Run6	384	Ethiopia-RCT	Ethiopia	East Shewa Zone	N/A	No	No	No	No	No	No	No	No	No	Yes	No	No	No
201645_D35	N/A	N/A	No	Run6	384	Ethiopia-RCT	Ethiopia	East Shewa Zone	N/A	No	No	No	No	No	No	No	No	No	Yes	No	No	No
202032_D28	N/A	N/A	No	Run6	384	Ethiopia-RCT	Ethiopia	East Shewa Zone	N/A	No	No	No	No	No	No	No	No	No	Yes	No	No	No
202135_D28	N/A	N/A	No	Run6	384	Ethiopia-RCT	Ethiopia	East Shewa Zone	N/A	No	No	No	No	No	No	No	No	No	Yes	No	No	No
202444_D42	N/A	N/A	No	Run6	384	Ethiopia-RCT	Ethiopia	East Shewa Zone	N/A	No	No	No	No	No	No	No	No	No	Yes	No	No	No
203449_M3D9	N/A	N/A	No	Run6	384	Ethiopia-RCT	Ethiopia	East Shewa Zone	N/A	No	No	No	No	No	No	No	No	No	Yes	No	No	No
203552_D14	N/A	N/A	No	Run6	384	Ethiopia-RCT	Ethiopia	East Shewa Zone	N/A	No	No	No	No	No	No	No	No	No	Yes	No	No	No
203964_M4	N/A	N/A	No	Run6	384	Ethiopia-RCT	Ethiopia	East Shewa Zone	N/A	No	No	No	No	No	No	No	No	No	Yes	No	No	No
205047_M3	N/A	N/A	No	Run6	384	Ethiopia-RCT	Ethiopia	East Shewa Zone	N/A	No	No	No	No	No	No	No	No	No	Yes	No	No	No
205562_M3	N/A	N/A	No	Run6	384	Ethiopia-RCT	Ethiopia	East Shewa Zone	N/A	No	No	No	No	No	No	No	No	No	Yes	No	No	No
205665_D42	N/A	N/A	No	Run6	384	Ethiopia-RCT	Ethiopia	East Shewa Zone	N/A	No	No	No	No	No	No	No	No	No	Yes	No	No	No
206258_M2D11	N/A	N/A	No	Run6	384	Ethiopia-RCT	Ethiopia	East Shewa Zone	N/A	No	No	No	No	No	No	No	No	No	Yes	No	No	No
206464_M3	N/A	N/A	No	Run6	384	Ethiopia-RCT	Ethiopia	East Shewa Zone	N/A	No	No	No	No	No	No	No	No	No	Yes	No	No	No
207469_M6	N/A	N/A	No	Run6	384	Ethiopia-RCT	Ethiopia	East Shewa Zone	N/A	No	No	No	No	No	No	No	No	No	Yes	No	No	No
207778_M1	N/A	N/A	No	Run6	384	Ethiopia-RCT	Ethiopia	East Shewa Zone	N/A	No	No	No	No	No	No	No	No	No	Yes	No	No	No
208371_M2	N/A	N/A	No	Run6	384	Ethiopia-RCT	Ethiopia	East Shewa Zone	N/A	No	No	No	No	No	No	No	No	No	Yes	No	No	No
209170_D35	N/A	N/A	No	Run6	384	Ethiopia-RCT	Ethiopia	East Shewa Zone	N/A	No	No	No	No	No	No	No	No	No	Yes	No	No	No
209376_D42	N/A	N/A	No	Run6	384	Ethiopia-RCT	Ethiopia	East Shewa Zone	N/A	No	No	No	No	No	No	No	No	No	Yes	No	No	No
ID004001_D137	N/A	N/A	Yes	Run6	384	Indonesia	Indonesia	Sumatra Region	N/A	No	No	Yes	No	Yes	No	No	Yes	Yes	No	Yes	Yes	No
ID004022_D0	N/A	N/A	Yes	Run6	384	Indonesia	Indonesia	Sumatra Region	N/A	No	No	Yes	No	Yes	No	No	Yes	Yes	No	Yes	Yes	No
ID004023_RVD0	N/A	N/A	Yes	Run6	384	Indonesia	Indonesia	Sumatra Region	N/A	No	No	Yes	No	Yes	No	No	Yes	Yes	No	Yes	Yes	No
ID004028_D0	N/A	N/A	Yes	Run6	384	Indonesia	Indonesia	Sumatra Region	N/A	No	No	Yes	No	Yes	No	No	Yes	Yes	No	Yes	Yes	No
ID004029_D0	N/A	N/A	Yes	Run6	384	Indonesia	Indonesia	Sumatra Region	N/A	No	No	Yes	No	Yes	No	No	Yes	Yes	No	Yes	Yes	No
ID004031_D0	N/A	N/A	Yes	Run6	384	Indonesia	Indonesia	Sumatra Region	N/A	No	No	Yes	No	Yes	No	No	Yes	Yes	No	Yes	Yes	No
ID004042_D0	N/A	N/A	Yes	Run6	384	Indonesia	Indonesia	Sumatra Region	N/A	No	No	Yes	No	Yes	No	No	Yes	Yes	No	Yes	Yes	No
ID004052_D0	N/A	N/A	Yes	Run6	384	Indonesia	Indonesia	Sumatra Region	N/A	No	No	Yes	No	Yes	No	No	Yes	Yes	No	Yes	Yes	No
ID004055_D0	N/A	N/A	Yes	Run6	384	Indonesia	Indonesia	Sumatra Region	N/A	No	No	Yes	No	Yes	No	No	Yes	Yes	No	Yes	Yes	No
ID004063_D0	N/A	N/A	Yes	Run6	384	Indonesia	Indonesia	Sumatra Region	N/A	No	No	Yes	No	Yes	No	No	Yes	Yes	No	Yes	Yes	No
ID004069_D0	N/A	N/A	Yes	Run6	384	Indonesia	Indonesia	Sumatra Region	N/A	No	No	Yes	No	Yes	No	No	Yes	Yes	No	Yes	Yes	No
ID004070_D0	N/A	N/A	Yes	Run6	384	Indonesia	Indonesia	Sumatra Region	N/A	No	No	Yes	No	Yes	No	No	Yes	Yes	No	No	Yes	No
ID004075_D0	N/A	N/A	Yes	Run6	384	Indonesia	Indonesia	Sumatra Region	N/A	No	No	Yes	No	Yes	No	No	Yes	Yes	No	Yes	Yes	No
ID004077_D0	N/A	N/A	Yes	Run6	384	Indonesia	Indonesia	Sumatra Region	N/A	No	No	Yes	No	Yes	No	No	Yes	Yes	No	Yes	Yes	No
ID004079_D0	N/A	N/A	Yes	Run6	384	Indonesia	Indonesia	Sumatra Region	N/A	No	No	Yes	No	Yes	No	No	Yes	Yes	No	Yes	Yes	No
ID004081_D0	N/A	N/A	Yes	Run6	384	Indonesia	Indonesia	Sumatra Region	N/A	No	No	Yes	No	Yes	No	No	Yes	Yes	No	Yes	Yes	No
ID004085_D0	N/A	N/A	Yes	Run6	384	Indonesia	Indonesia	Sumatra Region	N/A	No	No	Yes	No	Yes	No	No	Yes	Yes	No	Yes	Yes	No
ID004129_D0	N/A	N/A	Yes	Run6	384	Indonesia	Indonesia	Sumatra Region	N/A	No	No	Yes	No	Yes	No	No	Yes	Yes	No	Yes	Yes	No
ID004138_D0	N/A	N/A	Yes	Run6	384	Indonesia	Indonesia	Sumatra Region	N/A	No	No	Yes	No	Yes	No	No	Yes	Yes	No	Yes	Yes	No
ID004139_D0	N/A	N/A	Yes	Run6	384	Indonesia	Indonesia	Sumatra Region	N/A	No	No	Yes	No	Yes	No	No	Yes	Yes	No	Yes	Yes	No
ID004142_D0	N/A	N/A	Yes	Run6	384	Indonesia	Indonesia	Sumatra Region	N/A	No	No	Yes	No	Yes	No	No	Yes	Yes	No	Yes	Yes	No
ID004143_D0	N/A	N/A	Yes	Run6	384	Indonesia	Indonesia	Sumatra Region	N/A	No	No	Yes	No	Yes	No	No	Yes	Yes	No	Yes	Yes	No
ID004145_D0	N/A	N/A	Yes	Run6	384	Indonesia	Indonesia	Sumatra Region	N/A	No	No	Yes	No	Yes	No	No	Yes	Yes	No	Yes	Yes	No
ID004148_D0	N/A	N/A	Yes	Run6	384	Indonesia	Indonesia	Sumatra Region	N/A	No	No	Yes	No	Yes	No	No	Yes	Yes	No	Yes	Yes	No
ID004157_D0	N/A	N/A	Yes	Run6	384	Indonesia	Indonesia	Sumatra Region	N/A	No	No	Yes	No	Yes	No	No	Yes	Yes	No	Yes	Yes	No
ID004159_D0	N/A	N/A	Yes	Run6	384	Indonesia	Indonesia	Sumatra Region	N/A	No	No	Yes	No	Yes	No	No	Yes	Yes	No	Yes	Yes	No
ID004161_D0	N/A	N/A	Yes	Run6	384	Indonesia	Indonesia	Sumatra Region	N/A	No	No	Yes	No	Yes	No	No	Yes	Yes	No	No	Yes	No
ID004168_D0	N/A	N/A	Yes	Run6	384	Indonesia	Indonesia	Sumatra Region	N/A	No	No	Yes	No	Yes	No	No	Yes	Yes	No	Yes	Yes	No
ID004172_D0	N/A	N/A	Yes	Run6	384	Indonesia	Indonesia	Sumatra Region	N/A	No	No	Yes	No	Yes	No	No	Yes	Yes	No	Yes	Yes	No
ID004185_D0	N/A	N/A	Yes	Run6	384	Indonesia	Indonesia	Sumatra Region	N/A	No	No	Yes	No	Yes	No	No	Yes	Yes	No	Yes	Yes	No
ID004195_D0	N/A	N/A	Yes	Run6	384	Indonesia	Indonesia	Sumatra Region	N/A	No	No	Yes	No	Yes	No	No	Yes	Yes	No	Yes	Yes	No
ID004202_D0	N/A	N/A	Yes	Run6	384	Indonesia	Indonesia	Sumatra Region	N/A	No	No	Yes	No	Yes	No	No	Yes	Yes	No	Yes	Yes	No
ID004203_D0	N/A	N/A	Yes	Run6	384	Indonesia	Indonesia	Sumatra Region	N/A	No	No	Yes	No	Yes	No	No	Yes	Yes	No	Yes	Yes	No
ID004207_D0	N/A	N/A	Yes	Run6	384	Indonesia	Indonesia	Sumatra Region	N/A	No	No	Yes	No	Yes	No	No	Yes	Yes	No	Yes	Yes	No
ID004208_D0	N/A	N/A	Yes	Run6	384	Indonesia	Indonesia	Sumatra Region	N/A	No	No	Yes	No	Yes	No	No	Yes	Yes	No	Yes	Yes	No
ID004214_D0	N/A	N/A	Yes	Run6	384	Indonesia	Indonesia	Sumatra Region	N/A	No	No	Yes	No	Yes	No	No	Yes	Yes	No	Yes	Yes	No
ID004215_D0	N/A	N/A	Yes	Run6	384	Indonesia	Indonesia	Sumatra Region	N/A	No	No	Yes	No	Yes	No	No	Yes	Yes	No	Yes	Yes	No
ID004020_D0	N/A	N/A	Yes	Run6	384	Indonesia	Indonesia	Sumatra Region	N/A	No	No	Yes	No	Yes	No	No	Yes	Yes	No	No	Yes	No
UVD10	N/A	N/A	Yes	Run2	96	Indonesiao	Indonesia	Papua Province	N/A	Yes	No	No	No	No	No	No	No	No	No	No	No	No
UVD11	N/A	N/A	Yes	Run2	96	Indonesiao	Indonesia	Papua Province	N/A	Yes	No	No	No	No	No	No	No	No	No	No	No	No
UVD114	N/A	N/A	Yes	Run2	96	Indonesiao	Indonesia	Papua Province	N/A	Yes	No	No	No	No	No	No	No	No	No	No	No	No
UVD12	N/A	N/A	Yes	Run2	96	Indonesiao	Indonesia	Papua Province	N/A	Yes	No	No	No	No	No	No	No	No	No	No	No	No
UVD13	N/A	N/A	Yes	Run2	96	Indonesiao	Indonesia	Papua Province	N/A	Yes	No	No	No	No	No	No	No	No	No	No	No	No
UVD16	N/A	N/A	Yes	Run2	96	Indonesiao	Indonesia	Papua Province	N/A	Yes	No	No	No	No	No	No	No	No	No	No	No	No
UVD19	N/A	N/A	Yes	Run2	96	Indonesiao	Indonesia	Papua Province	N/A	Yes	No	No	No	No	No	No	No	No	No	No	No	No
UVD4	N/A	N/A	Yes	Run2	96	Indonesiao	Indonesia	Papua Province	N/A	Yes	No	No	No	No	No	No	No	No	No	No	No	No
UVD6	N/A	N/A	Yes	Run2	96	Indonesiao	Indonesia	Papua Province	N/A	Yes	No	No	No	No	No	No	No	No	No	No	No	No
UVD7	N/A	N/A	Yes	Run2	96	Indonesiao	Indonesia	Papua Province	N/A	Yes	No	No	No	No	No	No	No	No	No	No	No	No
UVD8	N/A	N/A	Yes	Run2	96	Indonesiao	Indonesia	Papua Province	N/A	Yes	No	No	No	No	No	No	No	No	No	No	No	No
UVD9	N/A	N/A	Yes	Run2	96	Indonesiao	Indonesia	Papua Province	N/A	Yes	No	No	No	No	No	No	No	No	No	No	No	No
UVT16	N/A	N/A	Yes	Run2	96	Indonesiao	Indonesia	Papua Province	N/A	Yes	No	No	No	No	No	No	No	No	No	No	No	No
UVT26	N/A	N/A	Yes	Run2	96	Indonesiao	Indonesia	Papua Province	N/A	Yes	No	No	No	No	No	No	No	No	No	No	No	No
UVT31	N/A	N/A	Yes	Run2	96	Indonesiao	Indonesia	Papua Province	N/A	Yes	No	No	No	No	No	No	No	No	No	No	No	No
UVT37	N/A	N/A	Yes	Run2	96	Indonesiao	Indonesia	Papua Province	N/A	Yes	No	No	No	No	No	No	No	No	No	No	No	No
QEM-279	N/A	N/A	Yes	Run2	96	Malaysia	Malaysia	Sabah State	N/A	Yes	No	No	No	No	No	No	No	No	No	No	No	No
MV1	PY0018-C	N/A	Yes	Run2	96	Malaysia	Malaysia	Sabah State	N/A	No	No	No	No	No	No	No	No	No	No	No	No	No
MIDAS-129	N/A	N/A	Yes	Run2	96	Sudan	Sudan	Kassala State	N/A	No	No	No	No	No	No	No	No	No	No	No	No	No
QECK_4	N/A	N/A	Yes	Run7	48	Technical_test	N/A	N/A	Human	Yes	Yes	No	No	No	No	No	No	No	No	No	No	No
QECK_1_NV22	N/A	N/A	Yes	Run2	96	Technical_test	N/A	N/A	Human	Yes	Yes	No	No	No	No	No	No	No	No	No	No	No
QECK_2_NV22	N/A	N/A	Yes	Run2	96	Technical_test	N/A	N/A	Human	Yes	Yes	No	No	No	No	No	No	No	No	No	No	No
QECK_3_NV22	N/A	N/A	Yes	Run2	96	Technical_test	N/A	N/A	Human	Yes	Yes	No	No	No	No	No	No	No	No	No	No	No
K1	N/A	N/A	Yes	Run7	48	Technical_test	(Traveller)	Unknown	P. falciparum	Yes	Yes	No	No	No	No	No	No	No	No	No	No	No
RDM_47_NV22	N/A	N/A	Yes	Run2	96	Technical_test	Indonesia	Papua Province	P. falciparum	Yes	Yes	No	No	No	No	No	No	No	No	No	No	No
KK_64_NV22	N/A	N/A	Yes	Run2	96	Technical_test	Malaysia	Sabah State	P. knowlesi	Yes	Yes	No	No	No	No	No	No	No	No	No	No	No
KK_95_NV22	N/A	N/A	Yes	Run2	96	Technical_test	Malaysia	Sabah State	P. knowlesi	Yes	Yes	No	No	No	No	No	No	No	No	No	No	No
KK_107_NV22	N/A	N/A	Yes	Run2	96	Technical_test	Malaysia	Sabah State	P. knowlesi	Yes	Yes	No	No	No	No	No	No	No	No	No	No	No
RDM_44	N/A	N/A	Yes	Run2	96	Technical_test	Uganda	Unknown	P. malariae	Yes	Yes	No	No	No	No	No	No	No	No	No	No	No
RDM_45	N/A	N/A	Yes	Run2	96	Technical_test	Uganda	Unknown	P. malariae	Yes	Yes	No	No	No	No	No	No	No	No	No	No	No
RDM_67_NV22	N/A	N/A	Yes	Run2	96	Technical_test	Uganda	Unknown	P. ovale	Yes	Yes	No	No	No	No	No	No	No	No	No	No	No
KV3_0_7_p-ul_1	N/A	N/A	No	Run5	384	Technical_test_sensitivity	Malaysia	Sabah State	N/A	Yes	No	No	Yes	No	No	No	No	No	No	No	No	No
KV3_0_7_p-ul_2	N/A	N/A	No	Run5	384	Technical_test_sensitivity	Malaysia	Sabah State	N/A	Yes	No	No	Yes	No	No	No	No	No	No	No	No	No
KV3_0_7_p-ul_3	N/A	N/A	No	Run5	384	Technical_test_sensitivity	Malaysia	Sabah State	N/A	Yes	No	No	Yes	No	No	No	No	No	No	No	No	No
KV3_0_7_p-ul_4	N/A	N/A	No	Run5	384	Technical_test_sensitivity	Malaysia	Sabah State	N/A	Yes	No	No	Yes	No	No	No	No	No	No	No	No	No
KV3_0_7_p-ul_5	N/A	N/A	No	Run5	384	Technical_test_sensitivity	Malaysia	Sabah State	N/A	Yes	No	No	Yes	No	No	No	No	No	No	No	No	No
KV3_0_7_p-ul_6	N/A	N/A	No	Run5	384	Technical_test_sensitivity	Malaysia	Sabah State	N/A	Yes	No	No	Yes	No	No	No	No	No	No	No	No	No
KV3_7_4_p-ul_1	N/A	N/A	No	Run5	384	Technical_test_sensitivity	Malaysia	Sabah State	N/A	Yes	No	No	Yes	No	No	No	No	No	No	No	No	No
KV3_7_4_p-ul_2	N/A	N/A	No	Run5	384	Technical_test_sensitivity	Malaysia	Sabah State	N/A	Yes	No	No	Yes	No	No	No	No	No	No	No	No	No
KV3_7_4_p-ul_3	N/A	N/A	No	Run5	384	Technical_test_sensitivity	Malaysia	Sabah State	N/A	Yes	No	No	Yes	No	No	No	No	No	No	No	No	No
KV3_7_4_p-ul_4	N/A	N/A	No	Run5	384	Technical_test_sensitivity	Malaysia	Sabah State	N/A	Yes	No	No	Yes	No	No	No	No	No	No	No	No	No
KV3_7_4_p-ul_5	N/A	N/A	No	Run5	384	Technical_test_sensitivity	Malaysia	Sabah State	N/A	Yes	No	No	Yes	No	No	No	No	No	No	No	No	No
KV3_7_4_p-ul_6	N/A	N/A	No	Run5	384	Technical_test_sensitivity	Malaysia	Sabah State	N/A	Yes	No	No	Yes	No	No	No	No	No	No	No	No	No
KV5_0_96_p-ul_1	N/A	N/A	No	Run5	384	Technical_test_sensitivity	Malaysia	Sabah State	N/A	Yes	No	No	Yes	No	No	No	No	No	No	No	No	No
KV5_0_96_p-ul_2	N/A	N/A	No	Run5	384	Technical_test_sensitivity	Malaysia	Sabah State	N/A	Yes	No	No	Yes	No	No	No	No	No	No	No	No	No
KV5_0_96_p-ul_3	N/A	N/A	No	Run5	384	Technical_test_sensitivity	Malaysia	Sabah State	N/A	Yes	No	No	Yes	No	No	No	No	No	No	No	No	No
KV5_0_96_p-ul_4	N/A	N/A	No	Run5	384	Technical_test_sensitivity	Malaysia	Sabah State	N/A	Yes	No	No	Yes	No	No	No	No	No	No	No	No	No
KV5_0_96_p-ul_5	N/A	N/A	No	Run5	384	Technical_test_sensitivity	Malaysia	Sabah State	N/A	Yes	No	No	Yes	No	No	No	No	No	No	No	No	No
KV5_0_96_p-ul_6	N/A	N/A	No	Run5	384	Technical_test_sensitivity	Malaysia	Sabah State	N/A	Yes	No	No	Yes	No	No	No	No	No	No	No	No	No
KV5_9_6_p-ul_1	N/A	N/A	No	Run5	384	Technical_test_sensitivity	Malaysia	Sabah State	N/A	Yes	No	No	Yes	No	No	No	No	No	No	No	No	No
KV5_9_6_p-ul_2	N/A	N/A	No	Run5	384	Technical_test_sensitivity	Malaysia	Sabah State	N/A	Yes	No	No	Yes	No	No	No	No	No	No	No	No	No
KV5_9_6_p-ul_3	N/A	N/A	No	Run5	384	Technical_test_sensitivity	Malaysia	Sabah State	N/A	Yes	No	No	Yes	No	No	No	No	No	No	No	No	No
KV5_9_6_p-ul_4	N/A	N/A	No	Run5	384	Technical_test_sensitivity	Malaysia	Sabah State	N/A	Yes	No	No	Yes	No	No	No	No	No	No	No	No	No
KV5_9_6_p-ul_5	N/A	N/A	No	Run5	384	Technical_test_sensitivity	Malaysia	Sabah State	N/A	Yes	No	No	Yes	No	No	No	No	No	No	No	No	No
KV5_9_6_p-ul_6	N/A	N/A	No	Run5	384	Technical_test_sensitivity	Malaysia	Sabah State	N/A	Yes	No	No	Yes	No	No	No	No	No	No	No	No	No
KV3_70_4_p-ul_1	N/A	N/A	No	Run5	384	Technical_test_sensitivity	Malaysia	Sabah State	N/A	No	No	No	Yes	No	No	No	No	No	No	No	No	No
KV3_70_4_p-ul_2	N/A	N/A	No	Run5	384	Technical_test_sensitivity	Malaysia	Sabah State	N/A	No	No	No	Yes	No	No	No	No	No	No	No	No	No
KV3_70_4_p-ul_3	N/A	N/A	No	Run5	384	Technical_test_sensitivity	Malaysia	Sabah State	N/A	No	No	No	Yes	No	No	No	No	No	No	No	No	No
KV3_70_4_p-ul_4	N/A	N/A	No	Run5	384	Technical_test_sensitivity	Malaysia	Sabah State	N/A	No	No	No	Yes	No	No	No	No	No	No	No	No	No
KV3_70_4_p-ul_5	N/A	N/A	No	Run5	384	Technical_test_sensitivity	Malaysia	Sabah State	N/A	No	No	No	Yes	No	No	No	No	No	No	No	No	No
KV3_70_4_p-ul_6	N/A	N/A	No	Run5	384	Technical_test_sensitivity	Malaysia	Sabah State	N/A	No	No	No	Yes	No	No	No	No	No	No	No	No	No
KV3_704_p-ul_1	N/A	N/A	No	Run5	384	Technical_test_sensitivity	Malaysia	Sabah State	N/A	No	No	No	Yes	No	No	No	No	No	No	No	No	No
KV3_704_p-ul_2	N/A	N/A	No	Run5	384	Technical_test_sensitivity	Malaysia	Sabah State	N/A	No	No	No	Yes	No	No	No	No	No	No	No	No	No
KV3_704_p-ul_3	N/A	N/A	No	Run5	384	Technical_test_sensitivity	Malaysia	Sabah State	N/A	No	No	No	Yes	No	No	No	No	No	No	No	No	No
KV3_704_p-ul_4	N/A	N/A	No	Run5	384	Technical_test_sensitivity	Malaysia	Sabah State	N/A	No	No	No	Yes	No	No	No	No	No	No	No	No	No
KV3_704_p-ul_5	N/A	N/A	No	Run5	384	Technical_test_sensitivity	Malaysia	Sabah State	N/A	No	No	No	Yes	No	No	No	No	No	No	No	No	No
KV3_704_p-ul_6	N/A	N/A	No	Run5	384	Technical_test_sensitivity	Malaysia	Sabah State	N/A	No	No	No	Yes	No	No	No	No	No	No	No	No	No
KV3_7040_p-ul_1	N/A	N/A	No	Run5	384	Technical_test_sensitivity	Malaysia	Sabah State	N/A	No	No	No	Yes	No	No	No	No	No	No	No	No	No
KV3_7040_p-ul_2	N/A	N/A	No	Run5	384	Technical_test_sensitivity	Malaysia	Sabah State	N/A	No	No	No	Yes	No	No	No	No	No	No	No	No	No
KV3_7040_p-ul_3	N/A	N/A	No	Run5	384	Technical_test_sensitivity	Malaysia	Sabah State	N/A	No	No	No	Yes	No	No	No	No	No	No	No	No	No
KV3_7040_p-ul_4	N/A	N/A	No	Run5	384	Technical_test_sensitivity	Malaysia	Sabah State	N/A	No	No	No	Yes	No	No	No	No	No	No	No	No	No
KV3_7040_p-ul_5	N/A	N/A	No	Run5	384	Technical_test_sensitivity	Malaysia	Sabah State	N/A	No	No	No	Yes	No	No	No	No	No	No	No	No	No
KV3_7040_p-ul_6	N/A	N/A	No	Run5	384	Technical_test_sensitivity	Malaysia	Sabah State	N/A	No	No	No	Yes	No	No	No	No	No	No	No	No	No
KV5_96_p-ul_1	N/A	N/A	No	Run5	384	Technical_test_sensitivity	Malaysia	Sabah State	N/A	No	No	No	Yes	No	No	No	No	No	No	No	No	No
KV5_96_p-ul_2	N/A	N/A	No	Run5	384	Technical_test_sensitivity	Malaysia	Sabah State	N/A	No	No	No	Yes	No	No	No	No	No	No	No	No	No
KV5_96_p-ul_3	N/A	N/A	No	Run5	384	Technical_test_sensitivity	Malaysia	Sabah State	N/A	No	No	No	Yes	No	No	No	No	No	No	No	No	No
KV5_96_p-ul_4	N/A	N/A	No	Run5	384	Technical_test_sensitivity	Malaysia	Sabah State	N/A	No	No	No	Yes	No	No	No	No	No	No	No	No	No
KV5_96_p-ul_5	N/A	N/A	No	Run5	384	Technical_test_sensitivity	Malaysia	Sabah State	N/A	No	No	No	Yes	No	No	No	No	No	No	No	No	No
KV5_96_p-ul_6	N/A	N/A	No	Run5	384	Technical_test_sensitivity	Malaysia	Sabah State	N/A	No	No	No	Yes	No	No	No	No	No	No	No	No	No
KV5_960_p-ul_1	N/A	N/A	No	Run5	384	Technical_test_sensitivity	Malaysia	Sabah State	N/A	No	No	No	Yes	No	No	No	No	No	No	No	No	No
KV5_960_p-ul_2	N/A	N/A	No	Run5	384	Technical_test_sensitivity	Malaysia	Sabah State	N/A	No	No	No	Yes	No	No	No	No	No	No	No	No	No
KV5_960_p-ul_3	N/A	N/A	No	Run5	384	Technical_test_sensitivity	Malaysia	Sabah State	N/A	No	No	No	Yes	No	No	No	No	No	No	No	No	No
KV5_960_p-ul_4	N/A	N/A	No	Run5	384	Technical_test_sensitivity	Malaysia	Sabah State	N/A	No	No	No	Yes	No	No	No	No	No	No	No	No	No
KV5_960_p-ul_5	N/A	N/A	No	Run5	384	Technical_test_sensitivity	Malaysia	Sabah State	N/A	No	No	No	Yes	No	No	No	No	No	No	No	No	No
KV5_960_p-ul_6	N/A	N/A	No	Run5	384	Technical_test_sensitivity	Malaysia	Sabah State	N/A	No	No	No	Yes	No	No	No	No	No	No	No	No	No
KV5_9608_p-ul_1	N/A	N/A	No	Run5	384	Technical_test_sensitivity	Malaysia	Sabah State	N/A	No	No	No	Yes	No	No	No	No	No	No	No	No	No
KV5_9608_p-ul_2	N/A	N/A	No	Run5	384	Technical_test_sensitivity	Malaysia	Sabah State	N/A	No	No	No	Yes	No	No	No	No	No	No	No	No	No
KV5_9608_p-ul_3	N/A	N/A	No	Run5	384	Technical_test_sensitivity	Malaysia	Sabah State	N/A	No	No	No	Yes	No	No	No	No	No	No	No	No	No
KV5_9608_p-ul_4	N/A	N/A	No	Run5	384	Technical_test_sensitivity	Malaysia	Sabah State	N/A	No	No	No	Yes	No	No	No	No	No	No	No	No	No
KV5_9608_p-ul_5	N/A	N/A	No	Run5	384	Technical_test_sensitivity	Malaysia	Sabah State	N/A	No	No	No	Yes	No	No	No	No	No	No	No	No	No
KV5_9608_p-ul_6	N/A	N/A	No	Run5	384	Technical_test_sensitivity	Malaysia	Sabah State	N/A	No	No	No	Yes	No	No	No	No	No	No	No	No	No
VN001_002	VVX01032	N/A	Yes	Run3	384	Vietnam	Vietnam	Binh Phuoc Province	N/A	No	No	Yes	No	Yes	Yes	Yes	Yes	Yes	No	Yes	Yes	No
VN001_007	VVX01035	N/A	Yes	Run3	384	Vietnam	Vietnam	Binh Phuoc Province	N/A	No	No	Yes	No	Yes	Yes	Yes	Yes	Yes	No	Yes	Yes	No
VN001_013	VVX01040	N/A	Yes	Run3	384	Vietnam	Vietnam	Binh Phuoc Province	N/A	No	No	Yes	No	Yes	Yes	Yes	Yes	Yes	No	No	Yes	No
VN001-026	VVX01053	N/A	Yes	Run2	96	Vietnam	Vietnam	Binh Phuoc Province	N/A	No	No	Yes	No	No	Yes	Yes	Yes	Yes	No	Yes	Yes	No
VN001-030	VVX01056	N/A	Yes	Run2	96	Vietnam	Vietnam	Binh Phuoc Province	N/A	No	No	Yes	No	No	Yes	Yes	Yes	Yes	No	No	Yes	No
VN001_031	VVX01057	N/A	Yes	Run3	384	Vietnam	Vietnam	Binh Phuoc Province	N/A	No	No	Yes	No	Yes	Yes	Yes	Yes	Yes	No	Yes	Yes	No
VN001_032	VVX01058	N/A	Yes	Run3	384	Vietnam	Vietnam	Binh Phuoc Province	N/A	No	No	Yes	No	Yes	Yes	Yes	Yes	Yes	No	No	Yes	No
VN001-043	VVX01067	N/A	Yes	Run2	96	Vietnam	Vietnam	Binh Phuoc Province	N/A	No	No	Yes	No	No	Yes	Yes	Yes	Yes	No	No	Yes	No
VN001_060	VVX01077	N/A	Yes	Run3	384	Vietnam	Vietnam	Binh Phuoc Province	N/A	No	No	Yes	No	Yes	Yes	Yes	Yes	Yes	No	No	Yes	No
VN001_108	VVX01109	N/A	Yes	Run3	384	Vietnam	Vietnam	Binh Phuoc Province	N/A	No	No	Yes	No	Yes	Yes	Yes	Yes	Yes	No	Yes	Yes	No
VN001_109	VVX01110	N/A	Yes	Run3	384	Vietnam	Vietnam	Binh Phuoc Province	N/A	No	No	Yes	No	Yes	Yes	Yes	Yes	Yes	No	Yes	Yes	No
VN001_087	VVX01133	N/A	Yes	Run3	384	Vietnam	Vietnam	Binh Phuoc Province	N/A	No	No	Yes	No	Yes	Yes	Yes	Yes	Yes	No	Yes	Yes	No
VN001_100	VVX01136	N/A	Yes	Run3	384	Vietnam	Vietnam	Binh Phuoc Province	N/A	No	No	Yes	No	Yes	Yes	Yes	Yes	Yes	No	Yes	Yes	No
VN001_102	VVX01137	N/A	Yes	Run3	384	Vietnam	Vietnam	Binh Phuoc Province	N/A	No	No	Yes	No	Yes	Yes	Yes	Yes	Yes	No	No	Yes	No
VN001_006	N/A	N/A	Yes	Run3	384	Vietnam	Vietnam	Binh Phuoc Province	N/A	No	No	Yes	No	Yes	No	No	Yes	Yes	No	Yes	Yes	No
VN001_008	N/A	N/A	Yes	Run3	384	Vietnam	Vietnam	Binh Phuoc Province	N/A	No	No	Yes	No	Yes	No	No	Yes	Yes	No	Yes	Yes	No
VN001_019	N/A	N/A	Yes	Run3	384	Vietnam	Vietnam	Binh Phuoc Province	N/A	No	No	Yes	No	Yes	No	No	Yes	Yes	No	Yes	Yes	No
VN001_040	N/A	N/A	Yes	Run3	384	Vietnam	Vietnam	Binh Phuoc Province	N/A	No	No	Yes	No	Yes	No	No	Yes	Yes	No	Yes	Yes	No
VN001_042	N/A	N/A	Yes	Run3	384	Vietnam	Vietnam	Binh Phuoc Province	N/A	No	No	Yes	No	Yes	No	No	Yes	Yes	No	No	Yes	No
VN001_044	N/A	N/A	Yes	Run3	384	Vietnam	Vietnam	Binh Phuoc Province	N/A	No	No	Yes	No	Yes	No	No	Yes	Yes	No	No	Yes	No
VN001_049	N/A	N/A	Yes	Run3	384	Vietnam	Vietnam	Binh Phuoc Province	N/A	No	No	Yes	No	Yes	No	No	Yes	Yes	No	Yes	Yes	No
VN001_063	N/A	N/A	Yes	Run3	384	Vietnam	Vietnam	Binh Phuoc Province	N/A	No	No	Yes	No	Yes	No	No	Yes	Yes	No	Yes	Yes	No
VN001_075	N/A	N/A	Yes	Run3	384	Vietnam	Vietnam	Binh Phuoc Province	N/A	No	No	Yes	No	Yes	No	No	Yes	Yes	No	Yes	Yes	No
VN001_077	N/A	N/A	Yes	Run3	384	Vietnam	Vietnam	Binh Phuoc Province	N/A	No	No	Yes	No	Yes	No	No	Yes	Yes	No	Yes	Yes	No
VN001_078	N/A	N/A	Yes	Run3	384	Vietnam	Vietnam	Binh Phuoc Province	N/A	No	No	Yes	No	Yes	No	No	Yes	Yes	No	Yes	Yes	No
VN001_079	N/A	N/A	Yes	Run3	384	Vietnam	Vietnam	Binh Phuoc Province	N/A	No	No	Yes	No	Yes	No	No	Yes	Yes	No	Yes	Yes	No
VN001_081	N/A	N/A	Yes	Run3	384	Vietnam	Vietnam	Binh Phuoc Province	N/A	No	No	Yes	No	Yes	No	No	Yes	Yes	No	Yes	Yes	No
VN001_082	N/A	N/A	Yes	Run3	384	Vietnam	Vietnam	Binh Phuoc Province	N/A	No	No	Yes	No	Yes	No	No	Yes	Yes	No	No	Yes	No
VN001_083	N/A	N/A	Yes	Run3	384	Vietnam	Vietnam	Binh Phuoc Province	N/A	No	No	Yes	No	Yes	No	No	Yes	Yes	No	No	Yes	No
VN001_084	N/A	N/A	Yes	Run3	384	Vietnam	Vietnam	Binh Phuoc Province	N/A	No	No	Yes	No	Yes	No	No	Yes	Yes	No	Yes	Yes	No
VN001_086	N/A	N/A	Yes	Run3	384	Vietnam	Vietnam	Binh Phuoc Province	N/A	No	No	Yes	No	Yes	No	No	Yes	Yes	No	No	Yes	No
VN001_088	N/A	N/A	Yes	Run3	384	Vietnam	Vietnam	Binh Phuoc Province	N/A	No	No	Yes	No	Yes	No	No	Yes	Yes	No	No	Yes	No
VN001_089	N/A	N/A	Yes	Run3	384	Vietnam	Vietnam	Binh Phuoc Province	N/A	No	No	Yes	No	Yes	No	No	Yes	Yes	No	Yes	Yes	No
VN001_090	N/A	N/A	Yes	Run3	384	Vietnam	Vietnam	Binh Phuoc Province	N/A	No	No	Yes	No	Yes	No	No	Yes	Yes	No	Yes	Yes	No
VN001_092	N/A	N/A	Yes	Run3	384	Vietnam	Vietnam	Binh Phuoc Province	N/A	No	No	Yes	No	Yes	No	No	Yes	Yes	No	Yes	Yes	No
VN001_094	N/A	N/A	Yes	Run3	384	Vietnam	Vietnam	Binh Phuoc Province	N/A	No	No	Yes	No	Yes	No	No	Yes	Yes	No	Yes	Yes	No
VN001_097	N/A	N/A	Yes	Run3	384	Vietnam	Vietnam	Binh Phuoc Province	N/A	No	No	Yes	No	Yes	No	No	Yes	Yes	No	Yes	Yes	No
VN001_105	N/A	N/A	Yes	Run3	384	Vietnam	Vietnam	Binh Phuoc Province	N/A	No	No	Yes	No	Yes	No	No	Yes	Yes	No	Yes	Yes	No
VN001_124_D0H0	N/A	N/A	Yes	Run3	384	Vietnam	Vietnam	Binh Phuoc Province	N/A	No	No	Yes	No	Yes	No	No	Yes	Yes	No	No	Yes	No
VN001_125_D0H0	N/A	N/A	Yes	Run3	384	Vietnam	Vietnam	Binh Phuoc Province	N/A	No	No	Yes	No	Yes	No	No	Yes	Yes	No	Yes	Yes	No
VN001_127_D0H0	N/A	N/A	Yes	Run3	384	Vietnam	Vietnam	Binh Phuoc Province	N/A	No	No	Yes	No	Yes	No	No	Yes	Yes	No	No	Yes	No
VN001_139_D0H0	N/A	N/A	Yes	Run3	384	Vietnam	Vietnam	Binh Phuoc Province	N/A	No	No	Yes	No	Yes	No	No	Yes	Yes	No	Yes	Yes	No
VN001_140_D0H0	N/A	N/A	Yes	Run3	384	Vietnam	Vietnam	Binh Phuoc Province	N/A	No	No	Yes	No	Yes	No	No	Yes	Yes	No	Yes	Yes	No
VN001_144_D0H0	N/A	N/A	Yes	Run3	384	Vietnam	Vietnam	Binh Phuoc Province	N/A	No	No	Yes	No	Yes	No	No	Yes	Yes	No	Yes	Yes	No
VN001_146_D0H0	N/A	N/A	Yes	Run3	384	Vietnam	Vietnam	Binh Phuoc Province	N/A	No	No	Yes	No	Yes	No	No	Yes	Yes	No	Yes	Yes	No
VN001_150_D0H0	N/A	N/A	Yes	Run3	384	Vietnam	Vietnam	Binh Phuoc Province	N/A	No	No	Yes	No	Yes	No	No	Yes	Yes	No	Yes	Yes	No
VN001_154_D0H0	N/A	N/A	Yes	Run3	384	Vietnam	Vietnam	Binh Phuoc Province	N/A	No	No	Yes	No	Yes	No	No	Yes	Yes	No	No	Yes	No
VN001_61_D	N/A	N/A	Yes	Run3	384	Vietnam	Vietnam	Binh Phuoc Province	N/A	No	No	Yes	No	Yes	No	No	Yes	Yes	No	Yes	Yes	No
VN001-306	VVX01008	N/A	Yes	Run2	96	Vietnam	Vietnam	Gia Lai Province	N/A	No	No	Yes	No	No	Yes	Yes	Yes	Yes	No	Yes	Yes	No
VN001_319	VVX01021	N/A	Yes	Run3	384	Vietnam	Vietnam	Gia Lai Province	N/A	No	No	Yes	No	Yes	Yes	Yes	Yes	Yes	No	Yes	Yes	No
VN001-321	VVX01023	N/A	Yes	Run2	96	Vietnam	Vietnam	Gia Lai Province	N/A	No	No	Yes	No	No	Yes	Yes	Yes	Yes	No	No	Yes	No
VN001_328	VVX01030	N/A	Yes	Run3	384	Vietnam	Vietnam	Gia Lai Province	N/A	No	No	Yes	No	Yes	Yes	Yes	Yes	Yes	No	No	Yes	No
VN001-390_D0	VVX12118	N/A	Yes	Run2	96	Vietnam	Vietnam	Gia Lai Province	N/A	No	No	Yes	No	No	Yes	Yes	Yes	Yes	No	Yes	Yes	No
VN001_302	N/A	N/A	Yes	Run3	384	Vietnam	Vietnam	Gia Lai Province	N/A	No	No	Yes	No	Yes	No	No	Yes	Yes	No	No	Yes	No
VN001_303	N/A	N/A	Yes	Run3	384	Vietnam	Vietnam	Gia Lai Province	N/A	No	No	Yes	No	Yes	No	No	Yes	Yes	No	Yes	Yes	No
VN001_304	N/A	N/A	Yes	Run3	384	Vietnam	Vietnam	Gia Lai Province	N/A	No	No	Yes	No	Yes	No	No	Yes	Yes	No	No	Yes	No
VN001_305	N/A	N/A	Yes	Run3	384	Vietnam	Vietnam	Gia Lai Province	N/A	No	No	Yes	No	Yes	No	No	Yes	Yes	No	Yes	Yes	No
VN001_308	N/A	N/A	Yes	Run3	384	Vietnam	Vietnam	Gia Lai Province	N/A	No	No	Yes	No	Yes	No	No	Yes	Yes	No	Yes	Yes	No
VN001_310_D	N/A	N/A	Yes	Run3	384	Vietnam	Vietnam	Gia Lai Province	N/A	No	No	Yes	No	Yes	No	No	Yes	Yes	No	Yes	Yes	No
VN001_312	N/A	N/A	Yes	Run3	384	Vietnam	Vietnam	Gia Lai Province	N/A	No	No	Yes	No	Yes	No	No	Yes	Yes	No	Yes	Yes	No
VN001_316	N/A	N/A	Yes	Run3	384	Vietnam	Vietnam	Gia Lai Province	N/A	No	No	Yes	No	Yes	No	No	Yes	Yes	No	Yes	Yes	No
VN001_322	N/A	N/A	Yes	Run3	384	Vietnam	Vietnam	Gia Lai Province	N/A	No	No	Yes	No	Yes	No	No	Yes	Yes	No	No	Yes	No
VN001_324_D	N/A	N/A	Yes	Run3	384	Vietnam	Vietnam	Gia Lai Province	N/A	No	No	Yes	No	Yes	No	No	Yes	Yes	No	Yes	Yes	No
VN001_325	N/A	N/A	Yes	Run3	384	Vietnam	Vietnam	Gia Lai Province	N/A	No	No	Yes	No	Yes	No	No	Yes	Yes	No	Yes	Yes	No
VN001_331_D0H0	N/A	N/A	Yes	Run3	384	Vietnam	Vietnam	Gia Lai Province	N/A	No	No	Yes	No	Yes	No	No	Yes	Yes	No	Yes	Yes	No
VN001_334_D0H0	N/A	N/A	Yes	Run3	384	Vietnam	Vietnam	Gia Lai Province	N/A	No	No	Yes	No	Yes	No	No	Yes	Yes	No	Yes	Yes	No
VN001_337_D0H0	N/A	N/A	Yes	Run3	384	Vietnam	Vietnam	Gia Lai Province	N/A	No	No	Yes	No	Yes	No	No	Yes	Yes	No	No	Yes	No
VN001_338_D0H0	N/A	N/A	Yes	Run3	384	Vietnam	Vietnam	Gia Lai Province	N/A	No	No	Yes	No	Yes	No	No	Yes	Yes	No	No	Yes	No
VN001_342_D0H0	N/A	N/A	Yes	Run3	384	Vietnam	Vietnam	Gia Lai Province	N/A	No	No	Yes	No	Yes	No	No	Yes	Yes	No	Yes	Yes	No
VN001_356_D0_D	N/A	N/A	Yes	Run3	384	Vietnam	Vietnam	Gia Lai Province	N/A	No	No	Yes	No	Yes	No	No	Yes	Yes	No	No	Yes	No
VN001_363_D0H0	N/A	N/A	Yes	Run3	384	Vietnam	Vietnam	Gia Lai Province	N/A	No	No	Yes	No	Yes	No	No	Yes	Yes	No	No	Yes	No
VN001_365_D0H0	N/A	N/A	Yes	Run3	384	Vietnam	Vietnam	Gia Lai Province	N/A	No	No	Yes	No	Yes	No	No	Yes	Yes	No	No	Yes	No
VN001_366_D0_D	N/A	N/A	Yes	Run3	384	Vietnam	Vietnam	Gia Lai Province	N/A	No	No	Yes	No	Yes	No	No	Yes	Yes	No	Yes	Yes	No
VN001_368_D0H0	N/A	N/A	Yes	Run3	384	Vietnam	Vietnam	Gia Lai Province	N/A	No	No	Yes	No	Yes	No	No	Yes	Yes	No	No	Yes	No
VN001_372_D0H0	N/A	N/A	Yes	Run3	384	Vietnam	Vietnam	Gia Lai Province	N/A	No	No	Yes	No	Yes	No	No	Yes	Yes	No	No	Yes	No
VN001_373_D0H0	N/A	N/A	Yes	Run3	384	Vietnam	Vietnam	Gia Lai Province	N/A	No	No	Yes	No	Yes	No	No	Yes	Yes	No	Yes	Yes	No
VN001_375_D0H0	N/A	N/A	Yes	Run3	384	Vietnam	Vietnam	Gia Lai Province	N/A	No	No	Yes	No	Yes	No	No	Yes	Yes	No	Yes	Yes	No
VN001_376_D0H0	N/A	N/A	Yes	Run3	384	Vietnam	Vietnam	Gia Lai Province	N/A	No	No	Yes	No	Yes	No	No	Yes	Yes	No	No	Yes	No
VN001_377_D0H0	N/A	N/A	Yes	Run3	384	Vietnam	Vietnam	Gia Lai Province	N/A	No	No	Yes	No	Yes	No	No	Yes	Yes	No	Yes	Yes	No
VN001_378_D0H0	N/A	N/A	Yes	Run3	384	Vietnam	Vietnam	Gia Lai Province	N/A	No	No	Yes	No	Yes	No	No	Yes	Yes	No	Yes	Yes	No
VN001_384_D0H0	N/A	N/A	Yes	Run3	384	Vietnam	Vietnam	Gia Lai Province	N/A	No	No	Yes	No	Yes	No	No	Yes	Yes	No	Yes	Yes	No
VN001_387_D0H0	N/A	N/A	Yes	Run3	384	Vietnam	Vietnam	Gia Lai Province	N/A	No	No	Yes	No	Yes	No	No	Yes	Yes	No	Yes	Yes	No
VN001_388_D0H0	N/A	N/A	Yes	Run3	384	Vietnam	Vietnam	Gia Lai Province	N/A	No	No	Yes	No	Yes	No	No	Yes	Yes	No	Yes	Yes	No
VN001_389_D0H0	N/A	N/A	Yes	Run3	384	Vietnam	Vietnam	Gia Lai Province	N/A	No	No	Yes	No	Yes	No	No	Yes	Yes	No	Yes	Yes	No
VN001_391_D0H0	N/A	N/A	Yes	Run3	384	Vietnam	Vietnam	Gia Lai Province	N/A	No	No	Yes	No	Yes	No	No	Yes	Yes	No	Yes	Yes	No
VN001_392_D0H0	N/A	N/A	Yes	Run3	384	Vietnam	Vietnam	Gia Lai Province	N/A	No	No	Yes	No	Yes	No	No	Yes	Yes	No	Yes	Yes	No
VN001_393_D0H0	N/A	N/A	Yes	Run3	384	Vietnam	Vietnam	Gia Lai Province	N/A	No	No	Yes	No	Yes	No	No	Yes	Yes	No	Yes	Yes	No
VN001_394_D0H0	N/A	N/A	Yes	Run3	384	Vietnam	Vietnam	Gia Lai Province	N/A	No	No	Yes	No	Yes	No	No	Yes	Yes	No	Yes	Yes	No
VN001_321_NV22	N/A	N/A	No	Run3	384	Vietnam	Vietnam	Gia Lai Province	N/A	Yes	No	No	No	No	No	No	No	No	No	No	No	No
VN001_104	N/A	N/A	Yes	Run3	384	Vietnam	Vietnam	Missing data	N/A	No	No	Yes	No	Yes	No	No	Yes	No	No	Yes	Yes	No
