# Supplementary material for: Microhaplotype deep sequencing assays to capture Plasmodium vivax infection lineages
Source: Research Square preprint supplement (doi:10.21203/rs.3.rs-5099658/v1), 2024-10-17
Supplement: Supplementary file 6 [file e5d06bb317009be664f67c83.xlsx]

## Sheet: concated_per_marker_dada2_mhaps
sample	method	100236	104765	111288	113672	118844	12243	127882	130632	139001	143020	145716	151535	153449	15441	157614	165484	178560	182475	185264	190188	191493	202627	206308	212462	214187	220647	226528	231108	234628	240353	246142	24710	247163	256576	259053	264031	267505	26982	270238	274564	276606	285205	291380	296123	301517	304503	307891	313080
100526_D0	dada2	425	386	367	438	546	180	902	907	114	481	611	192	458	427	996	168	286	779	1091	736	265	281	1377	209	1263	134	218	124	380	702	723	579	1172	620	662	340	202	678	1088	449	254	259	499	369	108	484	426	376
100526_D0	SNP	879	776	746	878	1102	360	1813	909	228	964	1229	387	916	865	2004	338	574	1569	2195	1483	534	564	2771	422	2529	274	436	248	768	1406	1455	1166	2347	1244	1328	682	411	1364	2182	451	508	518	1004	740	216	983	860	758
100629_D0H0	dada2	255	213	497	472	851	221	1014	463	67	259	276	142	343	462	514	111	356	658	603	298	183	176	502	108	645	226	190	101	264	449	465	732	668	142	358	231	103	370	691	192	290	118	267	214	82	316	278	397
100629_D0H0	SNP	558	455	1044	978	1792	456	2125	480	140	540	574	288	712	962	1076	232	740	1384	1268	630	380	358	1064	234	1352	470	402	210	543	926	982	1538	1382	294	744	474	226	788	1424	200	612	248	564	440	170	670	588	826
101222_D0	dada2	402	269	337	439	636	95	2614	825	111	456	503	134	376	381	993	146	163	604	1110	612	215	308	879	261	1121	102	225	104	274	845	700	646	940	627	503	318	154	525	975	366	170	184	545	192	356	179	441	357
101222_D0	SNP	836	542	682	884	1344	266	5289	832	222	914	1010	270	754	814	2000	344	364	1222	2232	1287	556	616	1762	527	2246	258	453	208	657	1702	1406	1302	1884	1256	1008	644	376	1062	1953	413	340	406	1094	478	712	360	883	716
101531_D0	dada2	397	308	294	362	540	171	2147	842	95	344	512	141	466	451	875	147	275	766	6	642	277	318	877	272	1139	147	227	114	334	556	642	758	901	551	449	340	161	605	1010	260	180	225	654	327	333	558	419	336
101531_D0	SNP	834	618	606	732	1103	345	4330	850	190	690	1038	284	936	918	1762	296	558	1550	14	1315	554	639	1768	548	2299	296	458	228	672	1118	1298	1536	1811	1112	902	680	332	1232	2035	261	360	450	1324	656	668	1140	842	680
101634_D0	dada2	540	457	467	678	888	202	4309	1120	144	545	852	212	532	676	1239	206	354	1010	1337	915	383	381	1115	285	1459	216	327	167	414	933	803	599	1292	767	607	431	228	753	1189	576	238	278	739	436	420	3	551	687
101634_D0	SNP	1145	916	964	1376	1810	410	8687	1129	288	1094	1717	426	1074	1385	2490	412	717	2042	2696	1858	772	762	2243	583	2927	432	655	335	831	1883	1613	1210	2594	1543	1219	866	490	1534	2580	578	480	558	1496	874	842	6	1109	1382
101840_D0	dada2	317	245	273	366	513	152	1068	664	88	298	451	153	381	369	798	119	215	587	939	540	204	216	580	231	840	131	190	93	252	762	525	469	802	450	427	265	120	441	702	330	149	175	384	242	293	440	296	456
101840_D0	SNP	646	490	558	738	1034	310	2139	667	176	598	903	306	762	754	1606	238	430	1184	1886	1101	408	432	1160	477	1682	263	382	186	506	1524	1058	946	1603	904	856	536	248	890	1554	332	298	350	771	484	586	890	593	912
102330_D0	dada2	318	252	218	340	564	127	946	678	82	273	444	124	326	330	754	115	205	543	892	535	181	244	950	177	777	101	185	107	251	471	537	712	706	474	463	273	158	479	872	34	127	194	432	254	250	329	311	248
102330_D0	SNP	660	508	505	684	1136	255	1900	680	164	644	898	248	654	674	1516	234	412	1094	1790	1078	364	488	1910	362	1562	202	370	214	580	944	1082	1440	1414	954	926	546	328	972	1750	34	254	388	866	509	502	666	624	498
102433_D0	dada2	250	168	152	249	366	71	872	478	53	229	276	111	247	217	650	76	56	371	525	360	138	181	786	196	734	89	150	57	187	497	344	263	500	309	381	167	136	357	524	252	120	139	292	195	168	439	214	224
102433_D0	SNP	510	338	306	504	820	142	1751	478	106	459	557	228	494	442	1304	152	116	764	1056	729	440	362	1579	395	1470	178	300	114	376	1000	697	532	1000	706	762	384	276	728	1052	253	240	278	588	392	338	888	428	454
102536_D0	dada2	375	311	274	394	706	177	1576	847	105	427	457	145	404	465	910	122	233	732	1092	656	316	289	1292	196	1038	127	242	129	279	931	650	528	927	519	507	351	168	563	861	274	166	210	531	312	324	219	353	422
102536_D0	SNP	772	626	559	797	1429	356	3164	851	214	856	914	293	808	942	1831	244	468	1474	2200	1326	632	578	2590	392	2079	257	484	262	563	1867	1304	1061	1856	1040	1016	704	346	1134	1879	275	336	422	1068	630	648	446	708	850
102948_D0H0	dada2	128	133	247	210	390	130	375	240	38	128	126	81	174	228	435	58	188	425	356	252	110	89	358	80	445	163	130	54	152	307	259	319	315	101	181	180	83	223	349	124	133	87	189	136	48	446	179	258
102948_D0H0	SNP	315	272	518	492	902	276	772	259	78	268	278	170	398	536	910	124	396	876	746	563	238	208	832	168	938	336	268	124	316	632	540	678	651	218	374	372	179	500	721	143	276	188	394	280	98	924	370	552
103129_D0	dada2	283	254	210	299	488	143	1669	622	79	336	413	123	365	315	785	116	218	563	785	510	231	217	930	175	794	101	173	107	303	605	486	659	672	431	412	248	157	521	772	267	135	181	427	249	271	441	316	332
103129_D0	SNP	598	510	428	604	986	285	3354	625	160	672	834	250	730	636	1575	232	438	1138	1576	1028	464	434	1867	354	1590	203	346	214	614	1214	972	1340	1348	866	824	496	326	1054	1546	267	274	364	858	498	542	890	632	668
103232_D0	dada2	332	323	188	397	599	148	2193	759	116	376	520	178	396	366	901	113	263	621	913	578	249	245	1138	210	862	128	232	112	335	498	559	672	762	470	420	312	170	510	768	364	159	192	444	321	302	349	372	412
103232_D0	SNP	704	648	392	808	1220	300	4429	767	232	754	1050	360	807	742	1812	230	529	1260	1835	1179	498	492	2298	426	1734	258	467	223	672	1004	1136	1368	1526	946	840	632	360	1032	1699	366	318	384	890	654	604	712	756	836
103335_D0	dada2	445	402	251	518	603	175	1563	825	116	400	631	177	509	432	1011	159	0	745	1038	768	306	243	1215	260	1198	120	265	135	355	828	629	491	1009	622	555	361	216	548	1002	398	166	260	532	344	351	530	466	516
103335_D0	SNP	932	804	506	1042	1220	352	3144	832	234	802	1262	356	1021	870	2028	324	2	1498	2080	1561	614	490	2439	529	2413	244	532	270	717	1658	1266	984	2024	1248	1112	722	445	1118	2010	399	334	520	1070	693	702	1074	934	1040
103747_D0	dada2	328	309	272	345	620	139	1334	624	97	332	497	164	329	431	850	113	226	623	967	655	186	262	1078	217	1017	106	198	98	303	485	587	696	838	478	456	271	164	553	796	345	168	177	455	293	292	513	364	418
103747_D0	SNP	682	620	548	697	1240	278	2690	625	194	668	999	330	660	878	1709	230	452	1248	1941	1319	372	526	2165	437	2042	212	400	196	608	974	1180	1408	1678	956	914	544	344	1120	1603	345	336	354	910	589	584	1036	730	840
104031_D0	dada2	332	302	223	346	518	141	1954	846	86	344	476	140	334	335	942	125	216	553	938	600	243	255	606	211	947	120	204	110	268	838	575	329	839	467	523	272	154	501	878	388	140	192	509	274	294	409	285	354
104031_D0	SNP	678	604	450	696	1052	282	3924	849	172	688	959	282	670	678	1891	250	432	1110	1878	1218	486	513	1217	432	1896	240	408	220	538	1680	1158	662	1682	938	1046	546	312	1006	1757	389	280	386	1026	550	596	822	572	714
104237_D0	dada2	215	180	136	213	289	89	2152	631	36	191	338	86	231	228	625	67	2	329	4	362	168	187	774	147	619	69	151	66	158	659	374	275	483	304	256	146	99	476	620	195	77	119	306	228	172	368	197	216
104237_D0	SNP	445	361	272	432	590	180	4326	634	72	384	679	172	464	464	1262	134	4	670	8	730	340	376	1565	308	1242	138	302	132	316	1326	752	554	970	612	514	294	204	958	1244	196	156	238	616	460	346	746	400	434
104340_D0	dada2	242	202	202	290	385	111	594	554	69	285	375	108	322	316	680	106	149	457	756	436	233	209	858	72	752	87	173	82	189	559	402	605	639	358	338	207	125	358	613	246	129	135	353	251	199	354	233	327
104340_D0	SNP	502	404	416	582	776	224	1194	558	138	572	755	216	646	642	1376	214	302	926	1523	888	466	418	1736	144	1512	176	350	164	380	1120	806	1224	1285	720	676	416	252	726	1233	247	260	274	714	502	400	712	466	664
104443_D0	dada2	425	306	295	409	575	155	676	796	90	338	478	131	410	380	879	124	234	602	0	694	265	275	1061	256	936	133	218	97	318	772	602	484	808	551	468	344	145	524	907	355	152	182	549	312	299	457	361	413
104443_D0	SNP	876	612	593	824	1174	310	1370	801	182	676	961	262	824	772	1774	248	472	1218	2	1397	536	554	2130	521	1874	266	436	196	640	1551	1214	976	1623	1110	936	692	292	1083	1818	356	304	370	1114	626	600	923	724	828
105036_D0	dada2	354	291	179	322	447	109	1212	600	82	263	464	118	316	245	807	113	175	579	549	557	101	233	926	124	912	107	165	116	245	613	499	518	744	491	346	287	142	454	814	221	94	91	438	296	207	422	327	325
105036_D0	SNP	734	600	498	710	984	218	2438	675	164	676	947	316	722	732	1622	282	350	1176	1158	1231	448	468	1860	250	1834	218	412	232	492	1335	1188	1204	1492	988	786	574	334	928	1717	306	250	328	890	598	458	850	654	826
105139_D0	dada2	354	257	277	385	519	136	1236	773	78	365	460	118	330	347	794	112	240	621	0	531	221	241	1027	205	867	117	196	91	297	735	542	696	845	416	398	273	147	536	856	371	154	183	424	259	69	246	338	306
105139_D0	SNP	736	514	570	776	1054	272	2484	779	158	732	926	238	664	710	1595	226	484	1254	4	1091	450	486	2065	420	1747	234	394	182	605	1480	1097	1418	1693	838	798	552	301	1090	1718	374	312	367	854	524	138	500	678	614
105551_D0	dada2	346	253	199	382	492	113	1699	704	77	335	467	122	402	349	876	105	218	555	893	506	277	254	784	175	930	98	183	78	275	867	561	501	646	471	337	271	161	695	847	226	114	178	472	303	309	587	356	447
105551_D0	SNP	724	506	404	768	990	227	3428	706	154	674	939	244	812	718	1756	216	436	1122	1799	1040	556	512	1580	352	1870	200	368	156	555	1741	1126	1026	1294	944	676	550	326	1396	1702	227	228	356	948	606	627	1191	716	900
105654_D0	dada2	312	274	227	315	564	134	2160	652	65	346	476	119	303	331	649	104	206	578	810	499	206	212	839	209	836	100	166	100	290	450	473	551	749	429	401	235	124	462	764	311	138	174	339	226	241	0	302	340
105654_D0	SNP	660	550	478	648	1154	272	4354	667	130	700	969	244	608	674	1320	210	415	1178	1638	1020	414	426	1692	432	1686	204	338	202	586	925	956	1113	1515	868	802	470	290	952	1677	314	278	352	698	468	490	4	608	696
105757_D0	dada2	381	291	249	320	625	132	2092	788	92	390	523	155	383	352	896	108	24	626	971	558	267	263	752	189	989	123	229	122	355	751	543	664	846	497	417	270	170	517	897	370	162	206	514	285	223	300	359	395
105757_D0	SNP	792	583	580	693	1262	264	4208	793	186	784	1166	314	836	794	1937	256	78	1336	1949	1365	586	526	1596	385	1990	250	478	245	718	1508	1110	1422	1697	1000	894	556	376	1060	1798	378	324	414	1030	574	484	608	718	878
106144_D0	dada2	290	265	244	332	487	161	1890	674	75	304	391	126	287	348	719	107	194	545	819	598	204	227	887	154	842	115	171	86	250	430	484	704	742	436	403	237	142	436	719	336	139	135	394	262	239	490	301	346
106144_D0	SNP	603	532	498	670	980	324	3800	676	150	618	784	252	584	718	1452	214	396	1100	1653	1208	410	459	1784	312	1688	236	344	172	500	870	979	1424	1488	872	808	476	304	884	1442	338	280	270	802	528	482	998	602	698
106350_D0	dada2	333	321	296	313	548	138	1492	779	67	349	468	121	454	402	870	109	227	576	1035	623	173	235	1024	272	969	133	214	123	307	679	590	798	804	466	446	282	169	544	806	238	111	148	418	300	214	603	410	337
106350_D0	SNP	706	648	605	714	1108	338	3002	783	134	700	945	282	933	820	1742	220	456	1222	2084	1271	464	474	2136	554	1949	271	432	246	620	1371	1188	1609	1613	1048	940	568	342	1106	1619	293	274	348	846	679	468	1230	822	808
106453_D0	dada2	400	309	305	388	707	158	1640	838	113	420	530	142	383	442	952	143	237	669	1130	729	273	259	1231	253	1052	135	238	130	312	893	586	907	905	572	478	320	171	516	967	437	177	203	498	316	308	578	377	479
106453_D0	SNP	840	618	626	788	1456	316	3300	845	230	846	1067	290	768	896	1932	288	474	1358	2275	1483	548	518	2472	516	2118	270	478	262	626	1795	1194	1836	1814	1146	961	648	352	1046	1945	443	354	412	1010	642	618	1174	756	960
106659_D0	dada2	391	259	283	319	569	153	1836	660	85	329	601	148	350	380	868	94	214	595	788	592	265	220	1232	291	963	124	235	116	320	437	527	658	690	521	515	295	208	550	708	388	132	156	411	342	325	615	339	384
106659_D0	SNP	806	518	574	644	1158	308	3694	662	170	662	1210	298	704	776	1748	190	428	1200	1584	1211	532	440	2470	591	1935	250	471	234	642	878	1062	1342	1384	1044	1032	592	430	1112	1421	390	266	315	825	694	649	1247	682	780
106865_D0	dada2	365	287	262	361	512	178	1536	749	70	311	520	113	452	346	854	88	0	563	936	584	281	225	1051	203	1001	83	147	85	311	510	605	591	557	544	388	270	147	480	799	355	101	189	484	279	342	623	342	442
106865_D0	SNP	775	576	532	729	1032	360	3103	753	140	622	1043	226	910	696	1724	176	0	1136	1878	1182	562	454	2113	417	2008	170	298	172	626	1026	1216	1184	1117	1094	776	540	314	982	1748	355	208	378	974	562	684	1270	688	894
107458_D0H0	dada2	214	189	417	399	694	215	504	390	71	208	212	117	253	397	670	77	295	583	516	448	160	167	713	77	592	242	199	102	241	352	406	446	562	138	291	215	99	253	506	156	216	126	227	173	197	757	247	377
107458_D0H0	SNP	470	402	865	833	1466	442	1046	406	146	426	459	240	522	834	1412	164	620	1224	1070	949	336	346	1470	157	1243	498	426	214	506	744	852	930	1162	280	620	440	208	524	1047	164	454	258	480	364	404	1608	514	780
107664_D0	dada2	259	235	234	277	466	106	1620	562	63	298	350	106	305	323	711	88	146	519	686	432	193	185	798	190	759	84	155	81	248	628	480	532	622	362	319	187	122	345	614	186	114	145	292	220	241	471	297	318
107664_D0	SNP	534	470	470	559	942	212	3250	571	126	602	705	216	612	658	1446	178	292	1044	1374	874	386	370	1604	380	1550	174	310	162	497	1270	964	1064	1250	746	641	374	246	706	1238	190	228	292	584	444	484	960	596	640
107973_D0	dada2	448	339	244	427	793	208	897	937	107	417	750	202	477	470	1017	157	270	769	1126	854	344	342	1408	323	1147	143	274	145	394	914	680	932	973	637	650	398	212	615	1040	393	202	213	555	370	341	911	423	441
107973_D0	SNP	930	678	496	858	1606	416	1806	943	214	842	1509	408	960	968	2045	314	542	1544	2257	1733	690	684	2826	650	2301	286	550	292	788	1840	1362	1878	1946	1278	1304	802	426	1239	2085	394	404	430	1120	745	686	1840	848	892
108772_D0	dada2	601	472	336	657	795	261	3197	1155	172	568	697	230	675	611	1453	219	291	957	655	1009	420	408	1712	386	1613	143	301	184	473	1139	1074	1133	1347	850	764	521	190	889	1470	565	247	343	852	409	532	726	578	703
108772_D0	SNP	1282	960	888	1317	1668	528	6532	1166	344	1234	1679	526	1354	1296	2906	444	648	2020	1316	2112	848	910	3438	786	3300	431	668	418	956	2410	2152	2286	2703	1705	1533	1126	539	1792	2978	571	554	686	1716	930	1066	1482	1158	1454
109365_D0	dada2	115	96	98	120	123	55	656	259	26	98	165	57	120	152	317	42	67	232	124	217	104	82	308	56	370	47	80	44	110	226	219	136	313	182	157	94	31	187	274	132	0	72	173	79	107	108	139	133
109365_D0	SNP	280	238	196	264	274	110	1320	262	52	288	330	138	288	306	638	84	168	464	250	440	213	164	764	114	832	94	178	88	220	454	438	320	626	366	328	188	102	376	551	134	90	144	354	160	214	218	278	266
109468_D0	dada2	138	126	100	153	265	71	749	282	22	144	140	50	156	136	348	44	76	213	365	243	84	112	429	83	374	41	107	37	113	284	210	257	282	243	194	118	73	251	287	93	54	92	207	94	119	178	129	128
109468_D0	SNP	294	252	206	306	536	142	1518	284	44	292	280	100	312	278	696	88	152	434	736	496	168	226	861	170	753	82	214	76	226	572	422	519	564	492	389	238	148	508	576	93	112	184	416	190	238	358	258	258
109674_D0	dada2	462	387	516	474	853	219	1609	881	105	449	678	194	420	498	1016	159	319	806	1205	772	337	244	1482	348	1371	156	274	165	434	569	732	753	1044	718	547	382	214	814	1045	429	206	231	646	431	408	462	453	517
109674_D0	SNP	972	774	1060	953	1720	438	3246	884	210	898	1364	388	844	1006	2042	320	640	1618	2419	1561	676	496	2983	702	2746	314	548	330	872	1139	1480	1514	2100	1440	1095	768	446	1636	2259	429	414	466	1298	862	816	932	908	1042
109777_D0H0	dada2	154	118	275	168	399	135	177	218	50	111	132	76	180	272	419	57	209	327	298	280	75	96	387	63	436	135	115	45	158	186	215	411	267	81	183	123	62	409	293	131	112	83	164	99	118	188	202	175
109777_D0H0	SNP	336	240	570	354	856	288	372	224	100	232	281	166	374	580	886	116	440	688	614	590	154	204	811	132	902	272	246	94	330	386	452	870	554	166	384	256	130	845	604	136	240	170	342	210	246	400	410	378
109880_D0H0	dada2	187	164	321	373	575	137	1284	373	67	174	167	105	250	295	407	86	258	520	426	331	136	123	482	79	555	224	178	100	237	399	395	381	415	146	237	225	83	283	461	121	176	116	243	167	164	568	201	345
109880_D0H0	SNP	402	340	697	787	1216	286	2676	392	142	354	354	220	518	616	838	180	532	1090	884	717	282	257	1008	168	1158	472	374	209	502	835	814	788	870	302	496	466	174	592	964	132	371	236	520	344	338	1190	426	718
109983_D0	dada2	301	226	199	311	326	121	496	571	89	263	349	125	315	249	557	107	204	492	780	517	186	202	849	197	684	101	186	85	241	567	460	394	724	418	337	218	134	377	651	163	138	142	433	226	236	0	309	248
109983_D0	SNP	628	454	402	628	656	242	1000	573	178	530	698	254	632	504	1116	216	408	994	1564	1048	372	404	1702	397	1378	203	374	170	490	1136	924	788	1450	840	674	436	278	758	1309	163	278	286	870	456	476	4	620	498
110327_D0	dada2	636	512	497	677	1185	298	1280	1283	147	684	806	308	778	699	1559	255	406	1146	6	1085	539	593	1475	490	1695	236	415	197	477	942	1006	975	1535	929	850	489	275	826	1535	621	296	365	898	526	536	1150	613	772
110327_D0	SNP	1330	1023	1008	1365	2394	598	2574	1289	294	1376	1619	616	1564	1408	3125	512	813	2306	12	2204	1085	1186	2956	1002	3398	480	832	394	954	1888	2020	1962	3079	1862	1701	978	557	1668	3082	623	598	732	1804	1058	1076	2324	1230	1552
110430_D0	dada2	446	355	359	532	716	194	2796	887	124	369	727	217	486	474	1053	171	319	779	1178	786	355	354	1312	302	1177	163	291	140	399	765	707	603	1084	632	608	390	205	630	998	412	193	247	475	381	101	688	472	586
110430_D0	SNP	928	712	722	1064	1444	388	5630	892	248	746	1467	437	972	966	2113	342	640	1574	2362	1598	712	710	2628	610	2364	332	586	282	798	1535	1421	1212	2173	1270	1218	785	420	1266	2005	412	388	495	950	770	204	1392	948	1186
110842_D0	dada2	389	346	271	375	437	128	1298	724	87	428	498	165	364	379	849	147	252	612	1009	742	247	303	773	217	1168	92	228	153	359	941	557	598	944	561	489	291	158	563	917	378	196	236	570	280	372	506	392	309
110842_D0	SNP	807	692	553	754	884	262	2604	727	176	856	1001	332	736	772	1702	296	506	1232	2026	1508	494	606	1549	447	2354	191	460	306	726	1886	1127	1216	1893	1128	988	586	326	1144	1978	378	394	474	1152	562	746	1028	788	630
111126_D0	dada2	372	301	205	389	618	152	1497	779	121	340	477	134	469	374	927	144	3	626	1058	645	228	272	974	258	959	155	228	117	361	815	571	611	881	546	468	325	155	573	882	361	162	181	433	299	282	612	381	465
111126_D0	SNP	782	602	420	785	1256	308	3016	782	242	682	959	268	940	758	1860	288	6	1258	2125	1312	458	548	1962	528	1920	314	458	234	723	1632	1152	1240	1768	1096	943	650	336	1158	1780	361	328	364	872	602	564	1238	768	932
111229_D0	dada2	431	323	352	436	614	173	1467	817	124	435	550	173	465	391	1008	152	288	704	1205	753	268	277	1108	189	1133	138	273	153	396	1031	732	634	1054	644	550	396	221	580	1015	411	191	264	556	359	432	516	471	398
111229_D0	SNP	926	660	743	901	1332	362	2998	844	248	886	1132	354	943	830	2062	316	588	1456	2448	1565	544	570	2240	388	2283	278	564	310	806	2098	1508	1312	2126	1312	1116	800	458	1212	2223	416	382	532	1140	728	870	1088	950	822
111435_D0	dada2	289	196	203	255	418	160	1000	593	74	280	382	109	286	280	627	104	197	390	687	471	170	197	825	180	759	93	172	98	256	545	409	614	600	390	317	238	134	396	578	267	117	156	345	216	253	404	269	337
111435_D0	SNP	612	392	410	516	844	320	2018	595	148	564	768	224	574	578	1260	212	394	788	1390	955	340	398	1653	368	1522	186	346	196	516	1093	832	1246	1206	784	638	478	270	798	1157	268	234	314	694	434	508	816	537	682
111950_D0	dada2	543	427	396	499	921	245	1069	1016	152	591	671	221	654	557	1260	169	310	937	1391	948	348	402	1483	340	1285	168	349	150	413	1145	877	1245	1167	632	648	413	204	662	1213	588	229	302	685	413	478	1067	587	608
111950_D0	SNP	1138	854	800	1009	1855	490	2147	1027	306	1186	1349	444	1315	1132	2524	338	620	1890	2797	1916	698	806	2980	689	2577	338	698	300	836	2297	1756	2508	2344	1268	1298	836	432	1342	2429	589	464	606	1376	832	958	2155	1176	1216
112028_D0	dada2	439	371	339	456	706	187	836	795	124	446	605	187	509	466	1000	163	309	818	1179	815	273	288	1134	287	1106	157	273	156	432	899	733	1082	1048	678	615	361	197	619	984	433	188	230	561	359	417	759	506	453
112028_D0	SNP	917	746	690	916	1428	377	1684	803	250	898	1224	374	1020	954	2006	328	618	1640	2378	1659	546	576	2285	584	2220	320	550	313	868	1806	1474	2194	2110	1364	1232	724	420	1252	1973	433	380	460	1137	722	836	1528	1012	920
112234_D0	dada2	148	152	128	176	263	60	938	316	46	165	215	41	165	184	389	38	54	267	411	302	81	120	553	90	451	45	62	48	146	285	289	449	448	228	211	133	77	259	385	135	45	51	212	102	153	286	166	149
112234_D0	SNP	310	306	266	352	537	168	1895	317	92	332	438	120	332	372	782	106	172	540	834	609	278	242	1110	183	913	91	202	96	294	575	588	920	901	461	422	267	164	522	779	135	134	162	426	288	308	574	332	298
112646_D0	dada2	250	217	134	247	348	78	964	447	58	284	332	109	246	284	542	86	162	427	608	446	182	180	710	135	679	72	146	57	220	353	389	518	540	325	320	214	85	292	562	207	107	131	363	166	194	370	245	154
112646_D0	SNP	532	436	274	498	710	156	1940	452	116	574	672	224	496	576	1094	174	326	878	1236	904	370	362	1430	277	1360	145	294	154	448	708	782	1050	1084	656	642	428	182	594	1129	208	218	264	736	398	390	748	490	434
112749_D0	dada2	697	567	374	684	959	278	2436	1098	170	627	861	256	688	655	1490	224	387	1100	1528	1083	443	467	1887	350	1595	209	437	233	558	884	968	923	1345	1031	822	553	296	880	1496	558	328	341	684	555	579	833	582	634
112749_D0	SNP	1469	1137	760	1374	1926	558	4892	1101	340	1258	1734	517	1380	1337	2998	448	776	2210	3071	2192	886	933	3781	715	3194	422	878	466	1121	1777	1952	1864	2699	2070	1648	1106	613	1776	3001	558	658	686	1378	1112	1160	1674	1166	1276
112955_D0	dada2	220	155	241	299	302	107	312	344	38	185	225	86	203	281	397	95	136	370	432	353	136	147	485	127	468	111	135	56	155	251	249	275	420	259	220	208	73	229	377	152	71	93	236	166	154	335	195	328
112955_D0	SNP	452	310	499	602	616	214	636	348	78	374	451	174	406	576	802	190	274	744	868	723	274	294	980	264	946	222	272	112	312	502	500	558	845	524	441	418	160	466	756	152	142	186	472	338	308	686	396	662
113033_D0	dada2	345	257	4	522	830	214	1393	580	61	288	359	154	355	498	688	118	192	539	682	498	237	285	821	176	832	147	221	102	274	657	499	642	663	499	365	305	185	253	602	44	144	175	403	296	80	649	293	463
113033_D0	SNP	726	519	8	1048	1684	430	2824	583	124	578	728	308	714	1017	1388	242	384	1094	1372	1014	476	570	1659	360	1673	296	444	204	551	1315	1008	1308	1329	1016	733	623	374	518	1209	44	288	350	816	596	164	1321	600	926
113445_D0	dada2	54	53	65	158	178	66	284	90	13	85	115	47	38	111	127	24	47	125	230	89	56	49	234	9	183	44	41	0	70	208	128	107	152	135	126	73	35	103	182	55	27	28	127	71	61	86	96	139
113445_D0	SNP	162	152	134	316	360	132	582	173	26	172	232	94	102	232	326	52	94	250	466	194	112	144	473	24	414	90	112	32	140	418	262	214	304	274	256	150	74	242	367	67	57	56	254	143	122	246	194	278
113651_D0	dada2	195	110	166	229	251	76	702	272	42	160	200	74	170	250	362	63	106	300	318	262	90	122	341	119	395	72	117	45	132	322	286	157	362	291	205	155	65	173	269	123	78	80	261	157	137	275	135	288
113651_D0	SNP	400	220	356	462	504	156	1418	273	84	322	406	150	340	510	733	128	212	606	646	534	180	244	684	244	792	145	234	93	264	650	576	314	726	588	412	326	134	350	552	127	156	160	524	316	274	556	271	582
114965_D0	dada2	525	385	344	581	698	249	2143	716	119	391	588	192	406	618	1021	166	260	740	892	711	301	281	1363	300	1190	222	377	137	346	751	678	722	790	583	594	419	230	557	864	110	164	251	611	414	468	768	416	567
114965_D0	SNP	1097	771	696	1169	1414	500	4317	717	240	786	1188	389	812	1268	2047	338	523	1494	1791	1440	604	562	2737	606	2391	450	762	274	698	1508	1374	1460	1584	1174	1191	838	473	1124	1738	110	332	502	1234	832	936	1560	834	1144
115043_D0	dada2	393	260	311	528	639	210	1354	574	72	301	549	159	408	529	717	150	254	601	772	571	229	238	891	187	845	168	268	117	236	652	583	316	677	505	388	353	152	343	677	183	153	206	511	280	122	479	355	544
115043_D0	SNP	818	520	624	1072	1286	421	2722	575	144	604	1101	318	820	1082	1436	308	508	1214	1548	1149	458	476	1792	381	1696	343	537	236	476	1310	1174	640	1358	1012	778	706	316	696	1359	183	306	412	1030	564	244	990	720	1092
115455_D0	dada2	691	573	627	994	1237	315	1681	974	157	539	654	272	745	918	1094	260	330	1144	980	946	400	511	1118	439	1396	253	392	120	483	967	904	1072	1197	1027	664	621	261	580	1207	458	292	301	824	394	328	735	514	743
115455_D0	SNP	1438	1151	1273	1999	2504	638	3383	993	314	1086	1320	548	1490	1876	2198	568	660	2304	1971	1916	806	1023	2387	892	2805	532	798	368	972	1941	1826	2158	2402	2059	1339	1254	530	1178	2422	475	590	606	1657	793	721	1492	1030	1566
115867_D0	dada2	766	596	660	923	1510	336	3111	1086	161	692	890	342	732	976	1355	258	453	1175	1466	1007	436	521	1661	489	1465	340	530	231	529	978	1021	971	1459	1101	848	711	313	536	1374	419	321	301	1019	498	438	863	623	972
115867_D0	SNP	1567	1250	1338	1908	3157	747	6270	1194	322	1390	1831	690	1552	2038	2890	576	938	2436	2940	2229	934	1066	3335	990	3167	691	1080	464	1129	2002	2176	2098	2928	2258	1773	1446	638	1146	2762	521	682	704	2052	1094	918	1748	1247	1972
115970_D0	dada2	564	372	569	722	1088	248	2632	825	130	460	665	208	541	671	950	193	330	952	985	736	332	395	1009	243	1105	219	319	157	372	887	768	671	1025	810	571	472	255	469	1010	375	221	256	542	363	417	807	514	652
115970_D0	SNP	1175	744	1155	1452	2202	498	5312	829	260	920	1335	422	1090	1366	1904	392	664	1924	1986	1495	668	791	2025	488	2216	441	638	316	746	1778	1542	1352	2050	1622	1144	946	512	954	2027	376	442	516	1098	738	838	1640	1034	1310
116357_D0	dada2	323	252	328	453	668	148	1076	616	87	272	443	114	328	447	674	129	0	606	635	505	211	246	745	247	815	155	239	79	225	586	608	277	625	452	355	310	137	325	621	262	119	163	455	264	253	525	284	459
116357_D0	SNP	670	504	660	910	1354	296	2174	617	174	544	890	229	656	900	1354	260	4	1226	1274	1019	426	492	1493	496	1637	315	482	160	450	1174	1220	556	1254	910	712	621	276	662	1248	263	242	326	916	530	506	1058	572	926
116460_D0	dada2	726	510	741	961	1267	429	1153	1086	166	590	849	303	711	885	1159	302	455	1261	1348	910	424	470	1291	422	1136	310	459	216	562	899	1048	1254	1425	987	843	648	329	519	1335	600	259	356	858	515	608	1352	623	900
116460_D0	SNP	1509	1020	1504	1947	2555	858	2324	1092	332	1180	1709	606	1424	1778	2325	612	910	2546	2717	1857	850	946	2595	862	2280	634	923	432	1130	1800	2116	2526	2863	1983	1693	1294	676	1060	2677	601	522	715	1724	1041	1220	2748	1250	1812
116769_D0	dada2	536	319	508	607	1164	295	1053	814	109	416	624	213	522	752	1116	197	240	836	943	708	290	345	1387	372	1335	209	312	124	388	920	773	1101	873	713	629	417	218	576	963	451	219	210	630	382	422	980	434	620
116769_D0	SNP	1115	642	1034	1232	2348	591	2114	818	218	832	1261	430	1046	1528	2238	394	486	1692	1894	1431	582	694	2791	749	2682	418	626	248	784	1849	1557	2235	1748	1430	1260	840	442	1164	1931	452	444	420	1268	773	848	1980	874	1246
117156_D0	dada2	443	261	395	558	726	145	745	632	81	308	467	181	354	503	752	144	213	709	755	613	226	268	818	11	725	203	265	108	285	642	540	384	674	566	399	365	137	305	691	278	114	207	509	294	284	785	362	647
117156_D0	SNP	916	526	799	1120	1470	362	1494	638	162	616	938	362	712	1046	1517	288	430	1424	1518	1243	454	536	1647	25	1460	411	534	216	572	1284	1086	774	1353	1142	801	740	280	614	1384	279	284	414	1020	588	572	1596	726	1298
117259_D0	dada2	581	406	545	742	1196	240	4928	719	118	365	672	240	414	784	1007	220	0	836	3	828	268	383	785	353	1151	173	315	150	398	785	798	896	1082	698	615	482	238	474	960	59	206	264	628	339	321	1117	424	732
117259_D0	SNP	1220	814	1102	1500	2446	480	9952	724	238	938	1355	486	838	1590	2029	448	4	1698	10	1701	596	768	1575	739	2314	346	632	302	804	1585	1610	1808	2180	1408	1232	968	498	968	1928	59	416	530	1264	686	644	2258	850	1476
117362_D0	dada2	593	429	543	798	1145	328	2486	783	125	471	641	259	574	700	1104	212	391	916	1156	886	355	377	1179	335	1159	285	331	151	536	551	765	1079	951	906	636	537	239	452	920	423	233	255	921	416	404	1200	516	807
117362_D0	SNP	1234	862	1103	1608	2319	656	5015	788	254	946	1299	522	1150	1436	2220	428	784	1846	2326	1804	714	754	2367	683	2325	576	664	306	1082	1110	1536	2180	1906	1822	1274	1080	487	918	2005	424	466	512	1854	835	810	2430	1049	1626
117465_D0	dada2	47	10	42	58	69	28	94	74	5	36	52	39	45	44	115	8	0	72	0	80	26	41	88	37	85	10	39	15	45	115	77	66	84	76	77	37	17	24	83	35	14	19	70	44	46	78	26	55
117465_D0	SNP	97	22	84	116	140	56	216	74	10	72	104	80	92	88	230	16	0	144	2	166	52	84	180	80	174	22	80	30	90	230	160	132	168	154	155	74	36	48	172	35	28	40	140	90	92	166	52	112
117980_D0	dada2	560	420	505	738	1149	245	2038	885	138	501	601	278	553	839	1158	207	350	977	990	859	356	445	1273	388	1169	237	388	149	381	1077	801	625	1115	817	618	486	240	445	1039	452	228	281	743	372	407	793	471	862
117980_D0	SNP	1164	846	1016	1486	2326	490	4102	889	276	1004	1214	566	1108	1708	2318	422	702	1972	1994	1749	718	898	2556	786	2352	480	782	300	767	2162	1606	1254	2233	1644	1242	978	492	904	2082	452	456	564	1492	760	818	1608	946	1732
118367_D0	dada2	503	310	477	617	774	177	2971	867	109	420	509	169	436	598	962	188	300	789	923	585	265	331	865	319	919	198	316	114	314	1018	760	750	864	733	556	422	221	308	869	269	186	227	637	368	398	617	367	754
118367_D0	SNP	1038	621	966	1241	1558	354	5981	871	218	840	1025	344	876	1222	1940	378	600	1594	1856	1188	538	664	1742	648	1843	403	636	228	630	2042	1534	1523	1731	1474	1112	855	442	624	1744	269	375	454	1278	746	797	1258	738	1522
118573_D0	dada2	365	253	349	590	765	197	1329	643	72	342	437	134	356	437	733	119	214	645	0	497	208	263	707	236	708	167	222	92	257	725	540	648	655	549	424	326	150	255	634	350	140	155	520	300	283	753	324	495
118573_D0	SNP	742	510	710	1197	1542	396	2690	644	144	686	884	270	716	898	1466	238	428	1310	2	1007	418	526	1426	482	1424	339	446	184	522	1454	1092	1308	1316	1106	853	660	308	512	1271	350	283	314	1046	612	568	1522	654	1000
118779_D0	dada2	58	23	37	81	119	24	494	98	14	35	63	24	70	95	181	8	20	115	112	122	29	51	154	32	95	35	24	15	57	148	73	161	72	113	66	74	22	81	89	31	16	43	117	47	27	66	58	117
118779_D0	SNP	122	48	74	162	242	48	1000	99	28	70	130	50	142	192	362	18	40	230	230	247	60	102	311	64	198	70	48	30	115	298	152	324	145	226	134	152	44	170	180	31	32	86	234	96	56	132	118	234
118882_D0	dada2	720	518	679	957	1438	397	2433	893	155	578	728	284	528	899	1135	213	359	1141	1245	931	389	435	1591	454	1324	328	390	199	495	819	1015	857	1118	995	767	573	282	465	1138	480	292	267	1017	472	435	1059	581	1078
118882_D0	SNP	1522	1036	1386	1938	2917	799	4905	897	310	1158	1460	572	1062	1840	2282	430	724	2294	2501	1887	778	872	3189	929	2654	667	780	398	996	1644	2042	1726	2243	1994	1536	1150	585	940	2293	480	598	540	2056	947	872	2150	1165	2166
119166_D0	dada2	796	680	794	949	1238	298	4023	1171	205	699	843	407	699	969	1485	337	501	1305	1440	987	513	663	1778	383	1561	292	514	246	640	889	1156	1030	1419	1201	870	657	327	526	1309	86	346	379	1132	516	575	1008	667	994
119166_D0	SNP	1653	1365	1626	1919	2490	602	8102	1178	410	1402	1696	816	1402	1980	2978	676	1006	2636	2898	2009	1036	1328	3561	782	3134	595	1031	492	1281	1789	2326	2070	2853	2410	1743	1320	680	1062	2865	86	694	764	2290	1038	1156	2046	1336	1996
119269_D0	dada2	315	214	281	418	654	190	392	517	45	257	412	96	244	370	589	84	156	483	615	478	198	232	820	166	793	121	190	91	236	591	548	390	482	451	343	237	117	276	507	234	79	116	448	211	288	668	214	401
119269_D0	SNP	656	430	568	843	1326	380	824	519	90	516	832	192	492	762	1192	172	312	974	1236	969	400	466	1654	350	1602	247	382	182	474	1184	1108	788	968	904	696	488	251	556	1022	234	162	234	908	429	578	1360	440	810
119372_D0	dada2	822	508	752	1065	1464	409	1815	1073	178	593	908	271	727	967	1485	277	455	1269	1510	1117	389	492	1624	518	1566	362	477	236	530	1255	1119	982	1345	1235	872	687	300	646	1238	532	294	346	1024	506	573	1451	640	1200
119372_D0	SNP	1706	1020	1543	2143	2958	822	3650	1076	356	1300	1825	614	1460	1962	2984	566	914	2560	3026	2260	856	986	3561	1055	3148	725	955	474	1218	2529	2250	1984	2704	2478	1746	1388	625	1377	2846	591	588	695	2056	1116	1242	2942	1292	2410
119681_D0	dada2	1046	696	960	1277	1482	424	3102	1241	208	807	1041	412	900	1148	1617	352	559	1690	1635	1369	532	646	2184	493	1884	433	547	260	641	1038	1475	1345	1659	1349	942	761	401	643	1644	692	433	393	1279	629	178	6	740	1324
119681_D0	SNP	2202	1395	1960	2573	2994	848	6272	1247	420	1626	2098	830	1823	2346	3246	714	1122	3442	3296	2802	1076	1298	4390	1014	3788	880	1103	522	1288	2082	2983	2711	3330	2711	1887	1534	847	1306	3315	695	870	794	2603	1266	362	20	1490	2674
119887_D0	dada2	927	695	749	1276	1813	447	1573	1295	210	779	988	401	850	1222	1828	393	0	1530	1643	1328	600	750	1948	565	1798	427	565	291	673	1579	1304	1310	1652	1361	1052	788	378	584	1577	718	362	428	1231	659	765	694	744	716
119887_D0	SNP	1925	1392	1510	2578	3662	900	3182	1302	422	1564	1984	810	1702	2495	3674	788	2	3088	3296	2695	1208	1500	3905	1146	3610	867	1132	582	1354	3169	2628	2652	3315	2728	2109	1582	762	1186	3165	719	728	860	2478	1328	1534	1408	1493	1438
120025_D0	dada2	1064	726	1039	1393	1671	446	3445	1322	266	771	1022	377	949	1189	1894	396	606	1706	1747	1303	578	641	2304	670	1877	493	716	287	748	1514	1578	1218	1876	1529	1268	1001	406	719	1702	674	459	449	1467	652	645	1517	801	1100
120025_D0	SNP	2225	1454	2104	2803	3387	900	6931	1328	532	1546	2066	756	1908	2418	3802	798	1214	3430	3506	2646	1162	1286	4625	1363	3764	997	1436	574	1500	3040	3160	2453	3760	3068	2540	2016	817	1454	3420	674	918	904	2948	1315	1294	3058	1608	2218
120643_D0	dada2	510	366	390	741	1035	266	2109	800	118	389	625	226	481	616	1021	190	326	894	992	654	332	354	1259	364	1290	278	278	166	380	757	798	527	911	764	502	406	202	450	994	400	178	213	640	400	380	466	442	759
120643_D0	SNP	1064	740	793	1503	2107	532	4290	806	236	782	1256	456	968	1260	2058	386	657	1816	2011	1336	672	712	2539	755	2592	556	558	334	768	1524	1618	1062	1833	1549	1016	824	416	916	1999	401	363	426	1290	808	772	948	898	1536
120746_D0	dada2	869	588	783	1098	1679	385	1401	946	227	615	939	330	666	951	1417	344	514	1350	1361	1129	418	550	1715	428	1496	395	550	213	587	987	1152	917	1353	1274	941	858	327	643	1430	479	310	349	1084	538	538	1090	684	1199
120746_D0	SNP	1813	1179	1586	2216	3385	774	2830	948	454	1236	1892	664	1342	1948	2847	690	1033	2728	2734	2287	840	1106	3441	871	3006	795	1102	426	1182	1978	2320	1850	2714	2564	1886	1730	674	1312	2866	479	620	706	2186	1086	1082	2220	1380	2428
121442_D0	dada2	919	681	809	1065	1707	455	2757	1080	193	622	931	345	830	1051	1395	246	562	1443	1540	1182	435	564	1692	527	1672	423	489	237	626	1359	1102	1814	1504	1324	875	788	357	811	1482	450	384	426	957	549	614	694	664	1066
121442_D0	SNP	1913	1368	1666	2160	3482	915	5580	1088	388	1247	1875	696	1662	2234	2804	496	1128	2918	3113	2400	874	1132	3575	1079	3358	855	982	474	1260	2736	2222	3688	3019	2667	1769	1630	755	1656	2968	451	773	856	1940	1116	1236	1414	1338	2158
121751_D0	dada2	1078	747	975	1232	1867	508	3144	1207	267	731	1101	491	1070	1198	1732	356	641	1710	1770	1418	513	662	2127	723	1978	470	641	328	865	836	1510	1292	1767	1559	1013	883	408	841	1728	525	422	365	1578	695	590	1826	910	1366
121751_D0	SNP	2227	1585	1977	2480	3766	1019	6316	1213	538	1466	2229	1030	2148	2446	3470	754	1291	3444	3548	3044	1076	1411	4266	1473	3989	948	1290	682	1738	1681	3040	2596	3542	3286	2101	1774	888	1694	3469	526	846	732	3170	1402	1180	3683	1822	2748
122035_D0	dada2	519	333	350	689	793	236	795	747	100	342	530	205	428	586	984	139	311	711	0	624	251	272	1135	24	887	262	285	127	377	816	687	504	706	756	470	411	0	390	794	315	181	233	673	324	393	564	422	439
122035_D0	SNP	1064	668	718	1398	1602	480	1634	756	202	688	1074	418	868	1188	1984	280	627	1440	12	1266	504	549	2289	66	1784	530	576	254	761	1646	1392	1014	1423	1538	952	846	6	798	1602	317	362	466	1350	656	792	1148	858	894
122138_D0	dada2	164	88	94	186	285	69	605	232	28	105	177	57	129	206	225	28	72	187	270	257	84	106	466	67	314	54	88	35	98	237	187	350	279	244	173	115	73	134	285	93	65	49	201	123	123	146	140	218
122138_D0	SNP	342	178	196	376	586	138	1248	233	56	216	358	116	274	416	464	58	144	386	556	524	172	214	950	140	638	110	184	70	198	483	382	704	564	518	349	242	152	278	574	94	130	102	406	254	260	304	288	442
123246_D0	dada2	543	398	520	816	855	334	1078	822	119	502	597	233	405	812	1046	192	278	855	1047	734	298	332	1097	321	896	266	340	166	401	644	728	860	959	747	617	444	212	442	916	448	202	243	600	404	440	927	440	727
123246_D0	SNP	1132	835	1066	1644	1728	672	2180	822	238	1008	1207	477	844	1647	2188	386	594	1812	2106	1502	626	698	2344	651	1874	536	684	334	805	1294	1457	1742	1926	1593	1239	954	434	890	1843	448	408	486	1212	808	882	1870	888	1552
123555_M3D21	dada2	787	656	762	1166	1789	340	2837	1070	188	577	860	377	558	1105	1327	305	502	1382	1381	1126	474	591	1749	513	1652	356	505	209	557	1280	1135	913	1418	1210	922	755	324	540	1234	535	333	312	1052	474	518	1261	659	1197
123555_M3D21	SNP	1624	1316	1554	2347	3629	685	5712	1076	376	1162	1735	758	1122	2255	2658	612	1010	2778	2764	2274	956	1187	3510	1043	3310	717	1014	418	1124	2566	2282	1828	2849	2433	1859	1516	668	1086	2671	536	668	626	2114	956	1041	2565	1324	2408
123761_D0	dada2	675	417	594	895	1225	323	2052	964	151	494	758	256	660	824	1105	214	425	1039	1182	860	350	432	1272	397	1300	206	388	211	492	825	973	662	1044	661	625	601	330	598	1116	355	232	290	755	470	463	906	566	857
123761_D0	SNP	1412	836	1219	1815	2474	648	4146	967	304	990	1520	516	1322	1686	2226	434	853	2116	2399	1746	714	867	2551	812	2623	618	786	426	1002	1694	1958	1336	2092	1342	1262	1216	666	1214	2243	355	466	580	1526	960	930	1846	1144	1724
123967_D0	dada2	735	587	681	1000	1470	384	2191	1064	152	620	953	297	737	1019	1150	285	466	1103	1240	978	417	524	1748	426	1526	284	443	219	559	1176	1061	801	1367	1029	854	559	298	552	1294	409	274	349	807	512	174	1013	658	696
123967_D0	SNP	1532	1176	1405	2027	2979	770	4436	1075	304	1246	1922	602	1484	2068	2314	576	932	2240	2505	1989	838	1054	3518	872	3066	571	887	438	1123	2365	2144	1620	2751	2073	1710	1130	640	1124	2611	411	554	704	1630	1032	350	2056	1326	1416
124148_D0	dada2	546	342	442	690	1128	278	1807	803	128	383	580	184	442	536	1000	167	285	786	922	643	275	315	783	303	1068	212	306	135	325	879	705	638	928	707	533	432	211	418	794	55	186	217	555	344	363	625	398	672
124148_D0	SNP	1131	684	886	1394	2280	558	3648	805	256	768	1170	370	888	1098	2008	340	574	1598	1850	1318	550	630	1573	618	2142	424	612	274	652	1766	1440	1295	1861	1426	1067	866	448	846	1722	55	374	436	1114	698	726	1275	798	1362
124251_D0	dada2	940	676	949	1197	1768	478	2496	1407	230	719	1057	384	792	1196	1728	367	609	1563	1708	1317	474	667	1783	638	2046	397	557	298	760	1125	1301	1143	1686	1381	1051	813	371	866	1724	648	340	408	1235	654	429	1499	870	1290
124251_D0	SNP	1960	1358	1922	2411	3571	963	5031	1415	462	1446	2137	784	1594	2566	3472	740	1228	3147	3437	2673	948	1334	3584	1295	4111	843	1116	598	1523	2258	2624	2298	3388	2772	2109	1628	752	1754	3456	652	688	818	2484	1330	862	3040	1740	2598
124457_D0	dada2	1156	836	963	1403	2123	520	2278	1285	296	937	1117	504	986	1323	2124	429	674	1848	1917	1656	632	768	2412	688	2236	451	716	345	847	1340	1520	1407	2053	1686	1294	1005	387	993	1770	199	361	448	1536	752	731	1660	906	1545
124457_D0	SNP	2404	1678	1974	2840	4300	1047	4611	1290	594	1888	2256	1012	1982	2704	4267	868	1360	3726	3860	3364	1282	1540	4837	1395	4486	1059	1450	690	1701	2704	3063	2848	4132	3378	2590	2014	926	2022	3782	203	972	900	3098	1526	1464	3385	1817	3112
124560_D0	dada2	846	615	779	1095	1613	464	2402	1043	193	724	922	362	531	1155	1553	340	467	1384	1398	1148	467	622	1913	518	1772	316	498	186	513	942	1182	1092	1494	1126	897	691	298	646	1451	107	381	411	1084	513	213	1239	754	1155
124560_D0	SNP	1753	1232	1583	2209	3251	933	4818	1047	388	1455	1854	732	1062	2356	3119	682	936	2786	2812	2327	938	1249	3836	1049	3566	751	1004	374	1254	1885	2384	2190	2998	2258	1798	1390	687	1302	2914	107	766	826	2184	1038	428	2509	1512	2320
124972_D0	dada2	645	508	576	812	1039	345	1167	997	158	528	761	267	519	874	1241	254	372	981	1292	1008	379	490	1437	389	1410	316	382	196	520	804	910	830	1208	852	744	616	260	1016	1217	528	283	281	800	426	474	1038	547	981
124972_D0	SNP	1348	1016	1162	1633	2081	692	2355	1003	316	1060	1533	540	1040	1786	2490	512	750	1982	2594	2037	760	982	2891	790	2826	639	766	392	1050	1612	1838	1676	2420	1716	1491	1242	535	2042	2440	529	568	568	1614	856	952	2096	1114	1972
125050_D0	dada2	799	620	723	1057	1640	445	2008	1235	211	631	981	358	880	1057	1280	327	525	1338	1483	1241	485	519	1807	552	1746	382	558	297	571	926	1197	1355	1403	1218	779	766	315	678	1382	542	352	350	966	565	633	882	763	1108
125050_D0	SNP	1677	1242	1511	2165	3343	910	4044	1251	425	1278	1976	728	1769	2170	2590	664	1061	2718	2998	2541	971	1042	3638	1120	3518	769	1130	598	1146	1886	2438	2762	2817	2450	1574	1542	694	1378	3015	546	710	712	1947	1150	1272	1821	1532	2248
125153_D0	dada2	845	646	841	1172	1780	437	3098	1199	197	725	958	356	822	1117	1773	332	538	1522	530	1233	607	552	1529	565	1839	412	539	231	673	1157	1261	1258	1570	1150	955	718	337	754	1416	633	398	406	1069	521	208	1538	741	1169
125153_D0	SNP	1776	1293	1698	2355	3656	875	6368	1204	394	1462	1927	718	1652	2330	3566	676	1078	3062	1070	2516	1214	1108	3071	1152	3696	835	1080	462	1350	2331	2546	2550	3146	2318	1910	1446	690	1518	2841	635	796	812	2150	1176	450	3108	1488	2348
125565_D0	dada2	900	686	861	1194	1297	447	1404	1298	202	665	1023	411	885	1184	1415	383	610	1436	0	1307	581	638	1885	583	1787	422	648	260	738	1369	1299	1093	1627	1348	899	801	389	692	1523	465	371	377	1216	629	651	1364	793	1174
125565_D0	SNP	1879	1375	1742	2405	2616	898	2831	1300	404	1336	2063	824	1778	2410	2844	774	1220	2884	12	2658	1166	1278	3775	1190	3585	851	1304	520	1483	2750	2612	2194	3263	2713	1801	1606	788	1398	3053	465	744	756	2448	1270	1302	2771	1588	2360
125771_D0	dada2	970	779	1034	1459	2245	498	3332	1518	248	793	1186	473	771	1377	1726	413	664	1829	1837	1433	644	712	1573	749	2165	485	680	318	744	1274	1506	1149	1827	1461	1063	962	401	900	1726	518	389	513	1244	702	862	1929	1057	1508
125771_D0	SNP	2063	1562	2155	2948	4572	1003	6712	1529	500	1592	2388	951	1546	2834	3478	842	1334	3696	3718	2929	1296	1428	3161	1511	4358	990	1364	638	1500	2561	3054	2336	3678	2940	2132	1936	852	1843	3751	522	790	1028	2506	1424	1728	3933	2124	3052
126055_D0	dada2	563	654	753	982	1524	437	2105	1129	237	631	561	357	789	853	1412	282	5	1534	1335	1013	432	378	1881	247	1738	380	356	282	766	1259	1120	1187	1609	489	845	672	299	571	1465	610	743	341	623	506	627	1543	684	785
126055_D0	SNP	1241	1356	1585	2054	3231	920	4402	1185	496	1296	1166	763	1662	1788	2930	600	10	3216	2782	2128	904	788	3902	522	3600	790	752	584	1589	2625	2340	2506	3330	1002	1757	1386	652	1190	3080	637	1556	704	1303	1048	1302	3228	1441	1658
126158_D0	dada2	489	485	783	790	1309	322	2586	929	206	510	496	276	706	875	1560	259	641	1295	400	1068	424	423	1426	217	1675	474	396	179	604	1222	1038	1003	1462	383	739	560	269	649	1340	576	602	331	797	381	522	968	615	735
126158_D0	SNP	1052	996	1734	1699	2750	688	5356	973	422	1072	1026	576	1472	1881	3248	556	1317	2740	833	2245	898	866	2948	462	3472	982	874	530	1263	2553	2162	2106	3038	792	1547	1164	566	1370	2919	600	1258	680	1678	794	1086	2030	1277	1546
126261_D0	dada2	961	875	1864	1653	3468	837	5755	1783	285	902	945	510	1230	1544	1963	427	1304	2750	2247	1787	667	660	2003	455	3030	823	776	427	1137	1463	1971	2206	2381	493	1273	1053	435	1251	2467	983	1020	560	1075	812	995	655	1110	1282
126261_D0	SNP	2151	1815	3920	3448	7292	1746	11941	1853	588	1850	1966	1070	2561	3263	4088	901	2696	5774	4684	3761	1376	1383	4178	965	6347	1703	1612	893	2361	3063	4094	4672	4941	1022	2652	2196	927	2634	5147	1024	2144	1166	2243	1696	2068	1365	2306	2686
127369_D0	dada2	493	456	1024	981	1952	481	2133	883	149	490	575	250	641	989	1444	212	730	1389	1265	1118	401	322	1537	285	1666	535	367	221	586	780	981	1476	1215	350	690	552	273	726	1266	388	600	286	672	454	484	797	602	745
127369_D0	SNP	1070	985	2167	2053	4127	1002	4488	922	314	1024	1198	520	1326	2064	3020	452	1524	3072	2637	2319	836	710	3393	607	3662	1111	814	458	1216	1618	2216	3118	2524	758	1437	1138	590	1588	2615	409	1268	590	1412	946	996	1668	1260	1550
127987_D0	dada2	554	566	1137	1158	2243	541	3577	1029	172	476	680	309	724	1040	1213	269	825	1652	9	1176	411	404	1784	280	1923	710	460	249	654	1225	1179	1338	1497	313	825	612	231	771	1503	647	635	317	630	520	545	1729	675	969
127987_D0	SNP	1237	1188	2476	2422	4749	1136	7456	1081	356	996	1420	648	1498	2190	2520	556	1739	3514	18	2463	852	834	3734	598	4040	1480	955	524	1382	2604	2507	2799	3101	662	1736	1266	524	1628	3139	676	1338	676	1322	1072	1140	3733	1408	2042
128168_D0	dada2	715	643	1040	1424	1913	658	1432	1415	212	692	705	340	798	1201	1688	306	13	2003	1658	1296	536	527	1219	360	2319	783	580	286	808	1618	1370	1439	1972	495	1058	763	357	1007	1845	861	814	460	800	639	710	1977	804	970
128168_D0	SNP	1575	1319	2212	2968	4010	1385	2978	1469	442	1448	1474	718	1674	2513	3516	642	26	4194	3466	2711	1126	1084	2536	768	4856	1626	1214	594	1679	3366	2858	3016	4081	1034	2201	1594	758	2102	3801	904	1724	962	1680	1340	1474	4132	1680	2028
128271_D0	dada2	540	541	1052	1009	1257	424	1014	1050	175	481	616	305	765	1001	1243	298	779	1472	1215	1039	376	403	1220	222	1620	507	498	254	667	821	1037	857	1371	358	752	609	282	715	1422	522	626	325	653	471	568	1201	685	1055
128271_D0	SNP	1186	1116	2192	2091	2628	878	2097	1093	364	988	1295	648	1588	2108	2594	625	1620	3083	2517	2173	786	840	2542	454	3400	1071	1026	524	1387	1751	2144	1808	2853	734	1576	1272	604	1510	2968	541	1300	668	1350	992	1182	2535	1436	2202
128374_D0	dada2	406	487	902	1037	1510	500	1252	1103	160	591	463	247	631	928	1595	229	709	1448	1290	1016	468	502	1566	180	1624	468	472	215	535	1043	1188	1732	1240	483	754	507	264	834	1222	614	624	285	598	475	491	1424	659	772
128374_D0	SNP	904	1037	1887	2172	3142	1046	2601	1188	328	1220	1044	521	1300	1946	3346	472	1467	3012	2677	2249	968	1068	3258	377	3404	976	976	448	1207	2161	2474	3678	2617	1000	1570	1070	572	1750	2706	659	1325	602	1253	988	1058	2994	1380	1638
130238_D0	dada2	570	622	1210	1220	2362	628	3342	1190	205	568	687	354	716	1107	1762	332	940	1926	1477	1236	537	486	1939	272	2245	769	569	294	771	1009	1325	1602	1593	491	857	742	292	1003	1654	724	714	414	857	572	657	277	785	1137
130238_D0	SNP	1348	1289	2714	2591	5004	1321	6916	1236	430	1204	1415	753	1633	2320	3683	686	1982	4040	3095	3008	1110	1019	4056	578	4656	1602	1198	608	1612	2138	2756	3364	3288	1018	1809	1548	605	2118	3439	755	1478	868	1794	1208	1364	582	1642	2410
200125_D0	dada2	615	702	1246	1267	2358	614	3075	1398	194	564	656	372	891	1188	1606	274	922	1866	1707	1254	474	516	1964	336	2199	753	505	281	800	1191	1509	1623	1687	486	895	672	295	1086	1794	765	815	415	725	642	602	2094	838	1168
200125_D0	SNP	1358	1463	2584	2663	4959	1296	6420	1453	406	1182	1358	762	1832	2490	3346	584	1930	3886	3550	2645	982	1064	4087	702	4586	1575	1052	582	1662	2508	3171	3408	3512	1022	1870	1408	624	2266	3724	803	1692	864	1514	1343	1248	4422	1745	2444
200434_D0	dada2	404	414	824	893	1720	369	2096	888	133	461	462	235	517	831	1341	188	588	1160	1040	722	421	384	1347	230	1416	455	389	188	471	866	878	948	1214	351	646	419	222	683	1115	589	525	221	566	405	480	1273	548	635
200434_D0	SNP	878	870	1732	1870	3626	772	4415	916	280	962	972	492	1085	1741	2784	388	1226	2416	2194	1513	880	802	2816	488	2960	946	812	378	995	1798	1834	1980	2538	750	1343	874	468	1414	2296	612	1106	464	1174	842	992	2686	1138	1320
200743_D0	dada2	507	451	840	863	1808	389	2697	876	116	489	426	270	594	917	1351	161	677	1389	1113	986	348	408	1442	209	1545	444	448	208	463	909	1059	1045	956	343	704	471	217	678	1074	452	365	315	671	394	522	1577	505	887
200743_D0	SNP	1075	944	1771	1814	3764	804	5674	911	238	1026	886	564	1223	1924	2802	328	1402	2932	2321	2059	730	843	2987	441	3198	940	936	436	974	1892	2252	2162	2001	702	1450	986	466	1424	2219	465	775	650	1401	826	1092	3319	1052	1846
200846_D0	dada2	531	574	848	966	1825	466	3240	991	158	429	503	266	504	874	1531	250	688	1414	1137	953	378	371	1437	12	1729	597	459	268	534	886	977	1128	1339	364	709	538	248	752	1260	555	520	290	607	464	518	1375	625	938
200846_D0	SNP	1149	1214	1802	2004	3856	982	6798	1033	329	886	1052	562	1040	1844	3180	522	1712	2977	2365	1995	796	770	2995	24	3588	1238	952	553	1116	2136	2064	2396	2767	766	1470	1132	534	1576	2784	581	1098	594	1272	962	1082	2874	1298	1962
200949_D0	dada2	443	410	869	657	1241	442	1129	924	163	458	476	238	644	840	1405	233	665	1281	1166	958	338	271	1480	232	1463	528	409	241	570	1007	1017	957	1244	383	725	537	232	878	1220	446	635	316	619	421	437	1497	529	1033
200949_D0	SNP	997	850	1805	1384	2612	926	2358	964	348	955	1003	500	1338	1784	2938	493	1396	2670	2448	1984	718	562	3082	486	3057	1104	850	512	1178	2080	2122	2002	2585	786	1498	1124	506	1859	2559	453	1333	670	1302	882	923	3124	1108	2160
201130_D0	dada2	676	719	1102	1493	2109	570	1635	1524	271	758	766	396	913	1539	2148	395	971	2075	1797	1470	659	659	2472	434	2354	918	874	415	751	2119	1623	838	2131	613	1178	821	387	1056	2162	142	911	512	1188	732	820	3006	894	1075
201130_D0	SNP	1497	1486	2345	3125	4444	1174	3422	1606	552	1594	1581	826	1884	3247	4466	826	1998	4328	3736	3088	1366	1384	5142	922	4946	1906	1822	860	1563	4395	3394	1756	4459	1262	2465	1704	824	2190	4512	144	1912	1056	2467	1521	1694	6318	1854	2262
201336_D0	dada2	429	495	919	883	1461	377	1073	888	156	446	507	300	592	775	1155	235	673	1523	1155	933	333	425	1515	189	1478	579	416	225	481	976	1026	897	1270	391	652	461	153	745	1371	528	458	265	539	413	504	509	591	853
201336_D0	SNP	934	1040	1935	1846	3038	782	2247	931	320	936	1051	626	1242	1678	2390	484	1405	3196	2403	1964	702	876	3102	396	3080	1209	886	480	1009	2034	2120	1854	2634	814	1338	968	451	1576	2851	544	968	548	1108	852	1054	1076	1226	1780
201439_D0	dada2	496	426	1015	897	1407	417	2026	969	164	459	491	273	609	835	1176	209	710	1281	1147	768	318	330	1425	210	1624	535	436	192	523	1053	1035	995	1240	291	584	522	246	630	1218	580	523	268	533	470	476	522	577	876
201439_D0	SNP	1093	892	2134	1879	2968	868	4265	1011	342	954	1011	572	1288	1776	2478	433	1472	2688	2379	1616	668	690	2980	450	3395	1114	910	394	1093	2202	2186	2078	2585	610	1227	1098	521	1352	2525	604	1085	544	1114	976	990	1092	1221	1830
201542_D0	dada2	616	599	1165	1276	1914	519	1941	1280	173	545	602	346	834	1042	1144	281	818	1380	1528	864	360	451	1592	324	1752	637	485	265	604	1240	1108	853	1500	391	753	674	310	837	1579	560	679	363	590	526	619	533	752	1278
201542_D0	SNP	1342	1260	2470	2664	4033	1069	4080	1347	364	1146	1262	716	1704	2184	2368	594	1706	2916	3195	2068	868	930	3314	698	3666	1324	1008	548	1241	2588	2322	1790	3114	836	1570	1400	687	1753	3448	665	1432	770	1222	1087	1300	1145	1562	2668
201645_D0	dada2	43	52	66	108	266	75	238	89	28	39	33	26	57	97	111	15	71	105	127	81	51	51	161	27	159	30	75	19	88	128	162	145	102	36	70	46	13	208	198	12	39	16	89	43	50	190	89	124
201645_D0	SNP	98	106	148	222	555	150	536	93	58	80	70	56	122	204	236	32	144	222	262	175	116	106	341	54	324	62	152	38	180	270	342	302	210	74	154	100	26	430	409	12	82	36	186	88	112	404	182	260
201954_D0	dada2	684	560	1223	1389	2790	576	1249	1166	164	736	596	262	720	1374	966	283	10	1464	1737	1062	495	551	2000	217	2167	633	585	252	573	1760	1378	1223	1235	561	971	548	254	1044	1775	841	423	396	600	543	726	732	684	1209
201954_D0	SNP	1498	1162	2593	2920	5852	1216	2626	1219	346	1548	1235	550	1514	2903	2024	600	20	3082	3594	2241	1040	1150	4158	456	4539	1323	1212	518	1182	3696	2902	2560	2587	1158	2024	1144	549	2166	3702	885	878	838	1246	1118	1501	1528	1434	2526
202032_D0	dada2	1017	992	2133	1869	3642	1067	4813	1959	330	1009	1010	607	1368	2120	3227	482	18	3081	7	2109	1055	796	3223	445	3383	1218	1114	485	1216	2273	2234	2223	2828	767	1529	1186	511	1587	2737	1204	1234	575	1419	1001	993	3310	1318	1930
202032_D0	SNP	2227	2048	4457	3941	7662	2238	10042	2047	678	2104	2117	1282	2876	4485	6706	1012	36	6455	14	4454	2196	1658	6712	927	7084	2537	2324	1008	2529	4749	4705	4677	5878	1607	3179	2460	1101	3330	5709	1251	2598	1192	2978	2097	2092	6951	2723	4048
202135_D0	dada2	490	382	853	844	1651	340	3539	1256	136	425	427	223	571	742	1347	204	579	1220	1128	841	328	385	1367	230	1386	528	409	222	490	947	971	862	1220	327	592	507	141	616	1153	547	481	210	687	378	414	1419	505	738
202135_D0	SNP	1063	798	1804	1769	3426	717	7332	1298	282	886	906	461	1184	1592	2790	430	1202	2540	2320	1814	740	796	2845	478	2858	1099	860	462	1020	2172	2020	1794	2528	688	1223	1060	388	1290	2385	570	1014	594	1424	790	864	2976	1050	1536
202444_D0	dada2	713	686	1325	1288	2537	618	3020	1531	232	665	792	421	764	1194	2011	323	13	2157	9	1525	532	583	2191	358	2392	808	592	352	879	1850	1529	1389	1817	547	971	779	370	1285	1980	858	838	420	1076	717	730	2137	916	1192
202444_D0	SNP	1557	1426	2811	2684	5291	1300	6292	1596	476	1384	1665	867	1594	2500	4168	676	26	4507	20	3214	1096	1220	4536	787	5012	1680	1230	734	1832	3828	3206	2882	3789	1142	2027	1620	796	2690	4100	890	1732	877	2259	1492	1508	4562	1902	2508
202547_D0	dada2	937	971	1876	1699	3414	904	4946	1736	302	984	963	554	1205	1704	2875	388	374	2940	462	1967	935	759	3014	489	3087	1057	899	392	1186	2092	2096	2399	2287	699	1388	940	449	1657	2516	1161	962	633	1463	811	886	3257	1088	1560
202547_D0	SNP	2046	1996	3947	3591	7195	1909	10335	1801	626	2054	2027	1162	2486	3598	5985	818	778	6168	971	4140	1973	1586	6272	1046	6404	2221	1870	802	2474	4356	4343	4996	4753	1448	2900	1956	970	3452	5238	1205	2028	1316	3047	1686	1820	6831	2258	3242
202650_D0	dada2	900	917	1655	1757	3525	869	7915	1662	320	851	962	514	1104	2117	2400	420	1208	2554	1899	1682	667	757	2466	466	3121	1102	794	337	1066	1949	1686	2538	2234	604	1273	1096	399	1522	2375	662	954	443	1215	777	760	3189	1057	1639
202650_D0	SNP	2001	1915	3600	3731	7464	1814	16553	1755	660	1776	2012	1082	2314	4532	4985	884	2516	5384	3975	3583	1392	1583	5158	981	6490	2310	1650	706	2232	4081	3544	5405	4636	1246	2654	2279	893	3204	4963	697	2010	914	2546	1634	1594	6760	2202	3424
202959_D0	dada2	756	843	1540	1568	2950	723	4445	1575	294	796	760	441	1030	1538	2514	380	20	2040	1845	1534	612	681	2651	438	2622	887	722	397	996	1511	1788	2279	2155	662	1228	880	327	1028	2201	924	1059	450	1071	749	798	2587	955	1534
202959_D0	SNP	1671	1760	3240	3283	6257	1519	9274	1633	610	1660	1611	916	2130	3232	5228	796	40	4292	3857	3222	1292	1407	5535	908	5444	1863	1516	818	2072	3162	3724	4826	4492	1366	2542	1824	704	2146	4893	970	2212	936	2260	1550	1638	5422	2002	3230
203243_D0	dada2	658	844	1383	1239	2403	663	3568	1286	185	673	629	355	844	1232	2044	302	7	1955	6	1357	676	539	2134	254	2139	760	601	284	741	1714	1421	1448	1903	486	910	767	306	846	1798	827	790	402	940	599	654	2190	796	1225
203243_D0	SNP	1439	1757	2910	2622	5096	1374	7450	1333	378	1391	1318	736	1748	2580	4250	630	14	4120	12	2838	1388	1130	4417	538	4457	1589	1249	584	1533	3580	2980	3062	3965	1007	1911	1596	638	1790	3765	863	1640	836	1945	1262	1381	4561	1652	2540
203449_D0	dada2	436	386	529	685	1338	323	1992	727	123	375	383	224	453	621	1142	162	8	978	846	741	396	278	1587	250	1503	474	392	143	495	909	826	768	979	267	619	435	212	739	936	422	436	204	554	356	461	1389	488	520
203449_D0	SNP	954	810	1108	1450	2830	660	4166	748	260	781	780	476	946	1316	2382	336	20	2036	1742	1582	804	575	3297	513	3110	989	822	302	1010	1890	1760	1590	2038	554	1284	922	446	1536	1956	437	914	426	1162	734	959	2917	1006	1074
203552_D0	dada2	772	827	1655	1528	3090	791	3932	1697	279	891	865	439	1033	1456	1864	425	1130	2524	2089	1458	680	644	2778	393	2806	613	700	344	990	2226	1743	2084	2447	620	1165	981	412	1289	2283	1093	1065	494	931	733	295	2711	978	1389
203552_D0	SNP	1686	1698	3484	3176	6482	1635	8216	1756	578	1850	1812	924	2172	3083	3876	902	2350	5272	4348	3065	1414	1330	5820	847	5820	1300	1464	716	2089	4677	3686	4348	5089	1280	2421	2058	893	2712	4756	1138	2204	1042	1955	1556	612	5700	2052	2894
203964_D0	dada2	632	720	1279	1160	2214	717	8299	1549	266	723	723	409	1031	1207	1693	367	1017	1880	1821	1440	530	519	2177	401	2076	684	604	377	927	1576	1336	1576	1977	407	989	819	354	995	1953	807	871	420	796	624	226	862	929	1331
203964_D0	SNP	1399	1491	2769	2447	4691	1494	17390	1626	550	1488	1512	879	2146	2534	3549	766	2110	3998	3837	3047	1098	1086	4545	857	4347	1430	1278	798	1935	3289	2834	3324	4119	863	2068	1707	841	2128	4089	839	1835	888	1673	1298	477	1834	1927	2784
204660_D0	dada2	128	115	188	163	217	114	613	218	32	101	107	64	166	185	286	44	0	268	233	216	64	108	305	39	348	108	96	49	120	222	222	206	250	88	129	111	50	148	299	142	136	67	150	99	45	300	101	145
204660_D0	SNP	288	244	410	349	481	244	1288	225	68	208	224	130	350	398	598	96	6	570	494	456	132	232	641	86	718	226	206	106	253	466	466	434	525	182	270	242	118	308	618	153	295	140	304	202	103	651	213	314
204763_D0	dada2	355	361	716	678	1158	239	1795	702	155	375	338	187	471	550	1054	181	332	950	828	628	207	281	952	174	1014	379	331	148	412	869	745	667	963	265	500	371	133	405	972	400	383	213	432	312	330	738	392	609
204763_D0	SNP	779	756	1498	1407	2428	570	3724	740	318	776	705	442	966	1277	2202	378	686	1976	1724	1534	580	586	2011	368	2128	802	706	306	848	1799	1544	1382	2010	556	1036	774	360	858	2040	417	784	506	900	660	684	1532	824	1288
205047_D0	dada2	204	188	338	382	412	149	973	343	51	166	182	86	255	285	382	92	0	439	393	309	127	145	319	91	579	204	157	91	217	430	421	407	480	141	245	153	78	226	460	189	185	106	185	154	154	392	216	285
205047_D0	SNP	438	382	700	798	886	304	2022	354	110	338	386	176	528	600	798	194	8	918	816	642	270	303	662	189	1191	434	330	188	445	902	884	854	1004	286	502	314	178	474	956	199	387	224	384	317	330	823	452	592
205459_D0	dada2	141	134	313	260	476	147	689	274	60	164	172	91	142	275	391	64	206	537	347	206	119	98	412	68	500	164	123	84	174	347	255	402	363	87	219	112	61	180	417	136	149	82	222	95	135	492	183	285
205459_D0	SNP	314	278	661	546	987	305	1434	280	122	336	352	190	294	585	808	132	428	1120	711	577	254	256	845	145	1038	350	252	170	366	723	659	856	762	252	454	324	129	376	864	144	310	168	463	256	282	1036	378	588
205562_D0	dada2	168	140	314	276	567	96	762	287	56	140	157	86	185	297	427	61	226	464	345	306	53	99	399	86	466	164	138	47	189	299	345	387	493	67	228	159	64	184	429	173	204	130	219	150	91	434	192	343
205562_D0	SNP	356	298	664	576	1176	330	1568	300	120	294	363	194	410	632	918	198	472	972	718	647	208	218	840	182	960	345	294	146	396	630	712	824	1022	244	470	370	145	390	901	176	416	268	456	308	198	924	406	712
205665_D0	dada2	139	83	291	304	428	84	1043	304	50	105	120	86	177	251	417	70	182	382	352	237	95	139	457	69	492	128	141	49	182	292	267	325	400	99	201	160	69	160	342	170	107	90	190	128	32	533	182	262
205665_D0	SNP	319	238	639	682	921	264	2162	332	106	258	341	192	362	548	886	152	387	836	757	592	196	288	963	149	1028	343	292	150	380	620	706	714	850	246	421	338	158	350	736	181	356	198	410	270	94	1142	383	560
205768_D0	dada2	115	112	196	170	221	68	487	214	44	102	116	48	131	182	325	71	146	277	243	189	107	103	245	52	288	109	117	49	134	206	208	162	258	78	152	137	55	110	254	75	115	59	149	108	40	65	128	159
205768_D0	SNP	254	232	410	354	458	142	1012	228	92	204	242	102	276	380	680	148	314	582	503	399	226	216	512	108	602	232	240	100	274	430	436	336	526	162	308	286	120	230	533	78	236	124	324	222	84	138	268	322
206258_D0	dada2	166	196	389	417	516	161	873	421	70	224	209	120	246	362	712	94	314	625	507	428	132	145	529	95	744	228	168	98	262	436	496	506	614	162	331	251	93	336	602	276	218	154	291	191	84	480	265	398
206258_D0	SNP	388	425	858	890	1106	336	1870	441	142	464	526	250	533	778	1493	212	649	1334	1074	993	276	308	1176	199	1552	484	365	208	546	934	1054	1164	1303	354	702	538	224	804	1259	288	457	328	610	398	176	1038	564	854
206464_D0	dada2	200	213	406	316	669	139	894	410	60	215	187	122	218	300	535	56	274	529	241	468	174	174	486	109	749	136	189	66	264	674	445	584	578	53	297	217	86	306	597	258	269	144	265	187	99	461	240	358
206464_D0	SNP	441	440	853	654	1398	366	1856	422	124	440	380	256	454	668	1106	170	564	1102	506	969	362	378	1009	226	1561	454	392	186	550	1386	922	1206	1190	160	630	446	187	630	1237	271	564	294	548	386	210	972	492	740
206567_D0	dada2	186	188	264	431	716	165	590	401	63	211	217	127	301	399	611	113	339	604	488	350	163	158	575	78	604	214	189	105	184	429	461	316	634	170	261	228	78	212	558	34	236	131	271	188	170	158	271	401
206567_D0	SNP	394	390	566	893	1528	340	1237	417	132	442	446	266	640	832	1264	242	712	1252	1009	738	352	326	1199	163	1256	451	402	216	386	888	978	680	1300	346	536	480	160	450	1171	37	490	269	572	390	346	338	556	832
207160_D0	dada2	64	49	148	163	168	63	326	130	30	49	76	37	72	122	222	36	105	173	188	103	39	57	175	27	207	75	30	31	76	106	128	153	169	57	100	53	34	100	148	51	67	23	87	45	69	225	86	122
207160_D0	SNP	138	132	310	336	430	130	692	133	62	120	160	76	187	274	466	78	220	366	392	289	112	126	366	64	432	154	82	62	158	222	260	316	350	118	206	168	72	206	320	55	138	70	179	100	138	470	182	256
207469_D0	dada2	114	117	229	289	529	149	672	276	47	137	160	88	170	261	459	75	0	395	7	276	95	96	428	60	469	120	100	48	154	297	258	314	360	98	199	117	58	232	377	103	111	86	170	131	131	410	179	272
207469_D0	SNP	254	244	610	604	1110	310	1392	285	100	276	330	182	344	538	952	154	8	832	16	578	198	200	902	128	956	314	222	102	380	622	616	646	745	198	414	250	131	476	786	121	268	180	352	268	272	870	372	578
207778_D0	dada2	108	123	170	228	336	117	608	202	35	113	70	52	180	210	297	38	104	346	148	217	107	110	354	58	355	146	97	63	143	223	207	294	342	60	148	70	46	177	263	106	138	84	139	111	113	348	135	164
207778_D0	SNP	246	258	448	473	718	238	1278	212	74	238	245	114	374	450	609	132	212	732	306	453	218	230	737	126	748	321	207	134	296	482	434	624	719	166	304	266	104	364	544	113	294	170	298	226	237	754	282	342
208062_D0	dada2	128	164	255	247	308	133	270	285	40	134	144	74	205	237	396	69	5	342	297	304	108	101	280	65	500	156	148	59	159	257	309	310	394	107	193	165	75	223	360	148	169	102	193	130	49	512	151	171
208062_D0	SNP	284	342	532	516	658	274	562	296	90	276	300	153	422	500	838	144	10	734	620	627	236	222	592	138	1032	322	302	118	338	534	638	664	816	226	410	342	156	452	754	159	350	212	394	268	98	1062	308	354
208371_D0	dada2	152	168	354	312	567	174	824	309	62	142	183	91	219	326	532	73	252	533	392	329	162	124	523	82	535	214	160	71	196	355	368	444	487	139	236	200	69	242	435	204	169	131	276	174	153	574	207	301
208371_D0	SNP	344	346	742	662	1182	356	1722	317	130	300	385	194	454	694	1114	148	525	1112	818	697	344	253	1082	178	1106	450	330	146	410	746	790	932	1012	291	499	422	148	504	911	211	358	266	584	364	325	1204	430	638
208474_D0	dada2	116	122	230	205	357	119	610	203	42	125	155	82	132	213	308	48	195	341	311	247	75	106	374	50	410	130	97	62	139	188	265	309	317	88	170	122	72	250	324	131	151	89	166	111	90	340	170	147
208474_D0	SNP	241	248	504	468	748	242	1282	212	86	264	325	174	266	458	636	98	414	708	655	552	170	216	779	104	942	273	214	126	287	456	564	660	662	180	358	266	156	560	686	154	320	184	342	228	216	728	360	308
208886_D0	dada2	187	168	383	371	674	187	1337	406	66	201	199	95	248	292	546	101	4	545	434	370	158	163	513	124	649	228	190	90	214	453	506	435	535	149	284	230	89	328	518	214	208	101	260	195	192	389	242	185
208886_D0	SNP	422	354	832	787	1417	392	2807	425	148	416	413	198	512	610	1142	206	8	1142	919	776	322	338	1063	254	1336	491	390	186	447	948	1048	916	1101	312	592	469	186	704	1069	223	434	218	544	406	398	822	500	392
209170_D0	dada2	165	156	330	280	444	161	721	288	46	147	218	88	208	309	523	79	249	463	369	322	140	130	492	90	531	185	161	87	202	286	320	354	456	119	199	171	70	221	384	202	177	105	215	149	141	606	199	324
209170_D0	SNP	374	326	725	610	934	335	1506	306	94	304	446	182	438	648	1103	162	518	970	770	681	290	272	1042	188	1112	384	332	178	432	594	692	751	938	249	420	356	152	474	806	210	368	218	444	315	294	1274	416	676
209376_D0	dada2	136	143	280	275	393	96	733	268	48	129	107	86	175	253	407	74	194	360	309	261	76	99	400	80	429	164	127	59	156	296	311	217	346	129	203	151	64	171	320	148	108	118	200	125	154	264	137	253
209376_D0	SNP	317	298	586	568	896	196	1540	287	102	264	294	174	384	550	866	152	410	748	646	554	176	206	938	168	884	344	278	122	320	653	650	458	729	272	426	320	130	362	662	160	304	248	418	262	314	548	288	556
209479_D0	dada2	147	133	203	235	416	86	246	225	36	107	143	56	147	162	305	62	177	336	262	203	76	101	217	55	347	125	107	43	146	210	229	327	322	72	163	139	56	142	304	110	134	73	102	100	109	376	136	229
209479_D0	SNP	320	274	424	477	878	174	518	235	78	222	298	116	298	344	634	130	366	696	544	431	158	213	450	120	730	256	222	90	302	436	475	678	672	152	342	286	114	294	639	111	274	148	212	205	228	808	286	470
209685_D0	dada2	272	274	462	596	907	186	1102	591	87	211	227	181	376	476	756	135	179	876	573	540	226	252	803	110	948	356	262	114	272	553	678	547	783	215	414	295	138	410	797	288	328	192	353	272	298	780	366	564
209685_D0	SNP	601	618	1097	1246	1902	476	2330	612	184	554	642	392	806	1205	1746	278	378	1846	1190	1132	556	524	1653	224	1973	742	560	236	696	1290	1414	1304	1620	518	854	720	348	854	1730	335	676	402	740	561	624	1638	753	1202
AF001_092_D0RP3_NV22	dada2	35	22	11	35	57	0	40	9	25	25	25	22	29	26	26	18	0	42	57	42	18	27	71	4	72	42	21	23	23	15	23	33	48	19	22	33	13	98	0	18	14	50	24	22	32	59	22	54
AF001_092_D0RP3_NV22	SNP	70	44	28	102	184	8	104	9	50	50	50	44	60	80	52	36	24	124	114	111	38	68	142	8	144	136	42	46	46	62	61	66	96	38	45	66	26	230	62	31	28	100	58	44	64	118	46	108
AF001_099_D0	dada2	177	472	165	103	167	15	656	303	77	143	135	178	297	119	727	87	235	110	255	130	71	403	152	0	88	77	346	278	431	965	693	313	771	315	268	173	180	36	567	378	400	190	487	268	304	103	197	476
AF001_099_D0	SNP	372	948	347	211	342	32	1334	308	154	288	273	363	605	248	1476	180	472	222	517	267	142	810	308	10	176	158	702	560	882	1968	1432	640	1559	638	540	350	440	76	1342	381	812	386	1018	546	614	218	407	968
AF001_101_D0	dada2	291	529	398	224	372	50	915	411	109	307	198	291	581	339	967	153	386	342	460	256	155	448	454	50	230	171	451	293	614	808	879	381	1067	438	385	287	212	96	786	351	509	289	505	390	356	66	308	663
AF001_101_D0	SNP	604	1065	813	452	752	100	1844	413	218	679	413	586	1200	688	1952	318	776	774	989	522	310	920	915	108	462	342	910	587	1244	1622	1875	782	2152	880	770	574	482	200	1761	361	1118	582	1062	784	754	134	620	1370
AF001_102_D0	dada2	229	490	347	213	207	48	718	271	105	277	183	133	494	348	798	158	407	318	453	228	195	428	263	26	287	107	350	217	510	626	751	197	805	358	387	293	205	95	562	263	477	243	519	318	352	210	271	514
AF001_102_D0	SNP	470	980	714	432	414	97	1448	272	213	556	368	266	996	712	1600	316	814	642	913	461	390	860	530	53	580	215	700	434	1036	1264	1515	398	1618	726	774	588	420	190	1124	264	962	490	1052	640	704	422	546	1042
AF001_103_D0	dada2	216	444	320	177	282	22	699	336	110	207	133	221	440	212	798	135	367	330	458	294	150	371	156	75	186	126	346	256	429	678	741	353	784	376	382	88	196	51	558	245	413	216	581	315	305	153	246	576
AF001_103_D0	SNP	456	888	651	356	576	46	1406	337	220	416	278	442	884	434	1612	274	736	666	925	597	300	748	313	152	376	254	692	516	864	1362	1502	718	1574	756	766	176	414	102	1320	245	828	434	1172	639	610	306	492	1162
AF001_104_D0	dada2	524	1016	449	512	274	137	1899	615	304	402	437	124	871	579	1742	272	588	647	854	608	378	1037	747	0	782	396	790	623	422	2540	1622	247	2041	745	677	742	452	408	1030	987	1093	648	1347	666	848	585	415	1319
AF001_104_D0	SNP	1104	2041	905	1029	550	276	3824	617	610	804	879	248	1750	1174	3492	552	1178	1304	1715	1229	766	2074	1502	6	1573	794	1582	1250	846	5092	3252	502	4092	1492	1360	1494	936	826	3029	992	2200	1298	2705	1342	1698	1182	830	2648
AF001_112_D0	dada2	335	935	379	496	492	85	1242	389	313	384	552	0	752	555	1243	344	691	508	668	663	454	827	902	37	906	394	381	485	411	1849	1270	258	1612	648	881	587	348	339	853	699	986	621	951	628	760	497	717	1243
AF001_112_D0	SNP	702	1875	810	1010	1004	172	2512	405	632	786	1121	2	1526	1136	2543	696	1417	1046	1375	1364	918	1674	1836	75	1824	797	772	980	834	3789	2742	538	3248	1322	1776	1194	754	705	1995	708	2024	1256	1977	1276	1523	1035	1460	2544
AF001_114_D0	dada2	198	423	155	234	281	22	703	278	120	166	206	63	373	151	720	130	351	248	265	266	196	364	298	14	313	189	359	210	241	907	670	73	828	350	328	176	197	91	585	320	416	281	454	305	322	114	245	519
AF001_114_D0	SNP	424	848	320	470	566	44	1410	280	241	334	418	126	752	310	1444	264	706	508	533	537	392	732	597	28	629	383	726	422	488	1816	1356	148	1661	700	656	356	410	184	1297	321	832	562	923	616	646	230	493	1046
AF001_117_D0	dada2	55	65	55	52	49	10	112	55	30	69	42	20	87	83	128	28	40	48	63	37	37	43	78	5	60	16	51	34	61	94	114	40	169	41	106	80	33	22	109	62	70	43	62	38	72	28	55	107
AF001_117_D0	SNP	118	132	114	108	100	20	283	55	60	138	100	40	182	168	304	56	98	100	134	85	82	96	163	14	122	32	120	68	125	236	242	82	340	84	214	194	66	46	237	62	140	90	156	80	148	58	122	220
AF001_118_D0	dada2	360	682	348	220	336	43	1068	573	148	306	280	347	744	330	1297	218	0	533	785	760	207	647	293	96	220	132	466	358	546	1001	968	660	1316	573	594	301	325	88	1082	600	640	254	731	481	408	605	373	712
AF001_118_D0	SNP	732	1368	715	447	680	86	2150	577	298	612	566	697	1494	676	2600	440	4	1080	1582	1536	414	1298	589	196	442	270	938	716	1098	2011	1960	1330	2641	1154	1193	604	656	176	2179	602	1288	512	1596	964	860	1218	784	1444
AF001_120_D0	dada2	203	324	420	271	230	76	522	279	110	260	228	156	356	338	532	107	331	411	458	350	209	273	528	79	411	153	244	155	290	706	471	262	611	270	353	235	150	176	396	172	366	199	379	197	250	70	289	392
AF001_120_D0	SNP	420	648	852	542	464	154	1048	281	223	522	458	312	714	684	1072	214	662	832	920	707	422	546	1066	160	824	308	490	312	586	1414	948	526	1222	547	709	474	308	354	911	172	739	398	762	398	500	140	580	794
AF001_122_D0	dada2	269	625	306	166	216	35	905	436	119	305	210	283	595	405	976	185	362	408	670	400	161	535	318	0	200	107	394	255	726	831	842	653	1076	471	474	192	236	52	913	370	502	283	649	349	329	17	337	574
AF001_122_D0	SNP	566	1252	635	332	444	70	1822	445	238	714	428	576	1194	838	1962	380	734	924	1348	827	322	1075	636	10	402	215	792	587	1466	1676	1702	1324	2160	948	952	390	498	106	1844	371	1010	570	1330	708	728	34	676	1150
AF001_123_D0	dada2	288	566	397	228	412	218	959	800	115	454	208	192	466	479	1202	165	556	569	889	882	217	470	1078	108	487	128	369	226	591	929	852	785	1128	385	492	209	223	123	1015	497	637	297	628	360	388	316	503	714
AF001_123_D0	SNP	600	1136	806	460	833	436	1928	818	232	912	419	386	952	990	2417	330	1136	1150	1816	1807	436	940	2168	220	1018	256	744	452	1192	1917	1728	1586	2265	780	985	420	468	250	2316	517	1278	602	1270	728	776	646	1008	1434
AF001_125_D0	dada2	357	483	581	401	368	112	755	542	119	484	300	297	593	609	922	196	554	744	900	808	261	418	596	208	601	223	410	251	626	789	798	825	951	425	621	369	228	145	872	454	547	334	617	365	373	422	477	740
AF001_125_D0	SNP	764	970	1183	808	748	224	1518	546	238	974	605	600	1191	1238	1853	398	1110	1504	1807	1632	524	838	1194	420	1207	448	826	502	1267	1593	1616	1668	1908	861	1246	744	472	294	1751	456	1106	672	1248	738	746	850	957	1486
AF001_126_D0	dada2	261	494	402	196	127	38	848	582	106	425	162	266	654	440	947	173	471	541	829	697	177	419	335	77	279	117	390	226	686	867	860	577	1122	409	495	225	272	49	1008	473	520	318	556	353	341	300	406	695
AF001_126_D0	SNP	535	992	817	394	254	76	1708	585	214	852	328	537	1309	888	1904	350	946	1096	1660	1406	354	840	673	156	562	234	786	454	1374	1735	1734	1156	2243	820	992	450	556	98	2023	476	1048	642	1116	707	684	609	814	1398
AF001_127_D0	dada2	181	389	375	222	227	132	488	211	181	382	316	176	554	340	630	165	443	366	540	656	248	371	1152	125	683	144	251	215	531	861	621	547	702	291	521	288	179	502	450	407	553	315	587	207	372	326	379	503
AF001_127_D0	SNP	370	782	758	450	458	264	982	212	364	768	637	357	1114	688	1270	332	889	740	1088	1321	498	744	2310	258	1370	288	502	430	1076	1731	1252	1100	1407	582	1042	578	360	1018	1090	407	1112	632	1182	418	746	662	760	1014
AF001_128_D0	dada2	195	445	289	0	159	121	453	109	199	403	254	215	420	311	488	182	2	282	490	522	62	325	1036	116	567	107	270	214	523	368	521	408	878	235	476	344	170	693	301	241	639	272	346	196	279	291	370	393
AF001_128_D0	SNP	392	890	589	10	320	242	912	110	400	808	514	434	842	626	976	364	4	568	983	1056	126	656	2086	238	1145	218	544	428	1058	738	1046	822	1762	478	955	694	348	1394	602	244	1290	546	694	394	560	590	744	788
AF001_129_D0	dada2	132	558	450	139	119	104	352	136	292	448	205	224	482	246	485	184	555	288	393	626	246	536	1566	2	746	69	275	329	675	910	665	526	1184	225	531	372	0	920	299	364	824	287	350	214	282	244	511	360
AF001_129_D0	SNP	268	1117	914	280	238	210	708	136	587	904	430	452	966	496	971	370	1114	582	788	1255	494	1074	3148	4	1500	140	552	658	1354	1825	1334	1052	2372	450	1064	748	0	1860	599	364	1658	576	702	428	564	488	1022	722
AF001_130_D0	dada2	192	725	350	277	138	91	718	385	289	446	262	151	473	305	515	238	552	254	555	484	227	713	2936	142	1259	123	249	303	899	980	521	595	1251	292	511	256	100	1131	741	686	697	435	458	208	494	377	484	643
AF001_130_D0	SNP	396	1452	726	565	276	182	1456	386	578	898	528	304	948	620	1046	484	1108	514	1118	984	460	1438	5926	287	2533	248	500	612	1826	1987	1062	1208	2518	586	1026	514	212	2288	2062	691	1400	880	924	416	995	774	976	1304
AF001_131_D0	dada2	243	864	196	100	147	13	919	103	178	416	181	388	717	218	853	186	0	163	506	272	110	740	295	7	184	104	543	482	854	1569	1057	109	1311	455	493	280	336	89	336	769	799	341	724	459	431	48	308	735
AF001_131_D0	SNP	502	1733	401	202	294	26	1866	103	356	836	364	780	1444	440	1716	372	4	330	1021	551	220	1488	592	14	368	210	1090	968	1740	3175	2134	220	2627	918	986	570	690	178	779	775	1610	688	1456	931	863	96	616	1480
AF001_132_D0	dada2	254	791	289	89	144	21	983	152	149	397	212	341	669	214	450	348	389	162	333	252	139	646	306	30	147	74	603	431	957	1432	1067	265	1243	442	439	210	319	75	459	625	775	339	691	368	417	50	336	748
AF001_132_D0	SNP	509	1586	586	180	292	42	1982	152	300	798	424	684	1342	430	902	696	780	328	672	520	280	1296	612	62	294	150	1214	866	1934	2873	2151	532	2496	890	883	420	674	152	1046	628	1561	680	1390	736	834	102	675	1508
AF001_134_D0	dada2	287	854	235	96	151	26	816	91	218	456	210	356	691	291	819	209	541	184	476	304	169	663	279	110	236	112	513	372	810	822	980	343	1186	385	644	341	288	77	350	420	856	376	727	437	441	46	368	678
AF001_134_D0	SNP	588	1717	482	260	368	52	1636	92	436	913	420	716	1390	586	1646	420	1088	370	958	654	340	1327	564	229	508	225	1098	854	1736	1655	1984	694	2377	770	1290	686	604	182	700	422	1728	754	1465	874	882	92	740	1444
AF001_136_D0	dada2	214	875	230	69	150	10	892	62	216	190	155	241	568	135	551	211	397	98	246	290	105	782	224	96	208	108	667	497	688	1524	1050	83	1128	323	429	314	293	70	288	754	895	346	618	428	326	23	310	561
AF001_136_D0	SNP	432	1766	472	138	302	20	1796	62	432	380	314	488	1142	278	1109	424	798	198	494	585	210	1566	450	192	420	216	1340	999	1380	3056	2116	166	2266	648	862	628	645	142	580	761	1810	699	1255	864	654	46	624	1124
AF001_141_D0	dada2	370	523	518	530	561	155	909	456	169	402	381	232	633	500	847	214	3	602	703	644	379	413	828	251	837	289	415	250	431	1204	777	462	932	431	565	406	200	516	747	510	564	398	633	359	471	158	423	871
AF001_141_D0	SNP	768	1048	1065	1071	1137	313	1824	459	338	806	769	470	1268	1020	1696	430	6	1208	1422	1304	758	829	1662	515	1680	582	832	502	872	2423	1564	936	1876	862	1135	818	415	1040	1761	512	1132	800	1280	726	942	324	848	1768
AF001_142_D0	dada2	271	702	380	177	330	50	1431	927	127	158	289	246	472	163	1369	189	509	400	477	181	153	628	437	67	166	233	633	321	479	1655	1227	212	1596	397	416	332	277	40	1184	644	666	330	851	510	438	39	282	895
AF001_142_D0	SNP	564	1412	780	536	664	102	2882	931	314	484	584	562	1009	424	2918	382	1023	808	955	473	344	1256	879	138	432	472	1274	642	962	3320	2471	504	3200	922	834	666	642	224	2771	651	1340	660	1724	1032	990	172	618	1810
AF001_143_D0	dada2	344	587	656	551	647	86	980	729	164	473	387	282	609	646	1029	205	395	806	821	569	309	448	678	142	758	326	413	250	667	998	884	649	1179	457	670	466	301	288	1006	485	628	331	640	441	526	813	500	617
AF001_143_D0	SNP	716	1179	1328	1114	1308	276	1976	734	330	948	806	568	1222	1304	2064	416	793	1626	1659	1147	620	900	1365	370	1532	662	830	500	1340	2001	1776	1304	2359	916	1342	936	614	586	2158	486	1265	668	1288	894	1052	1638	1004	1248
AF001_146_D0	dada2	439	640	517	319	450	108	1226	785	203	590	268	296	763	676	1293	241	630	833	961	756	133	561	1255	113	475	201	522	321	809	1173	1015	926	1464	516	521	325	335	81	1183	618	675	402	775	451	482	389	586	754
AF001_146_D0	SNP	974	1356	1070	642	1002	298	2470	789	408	1180	542	628	1602	1370	2598	482	1265	1754	1971	1734	316	1132	2517	294	950	404	1110	641	1724	2360	2228	1860	2935	1036	1042	652	759	221	2642	619	1444	806	1566	910	1024	786	1180	1520
AF001_147_D0	dada2	371	831	445	265	463	34	1493	665	152	306	285	201	764	206	721	208	585	306	521	228	184	716	457	84	224	273	726	430	930	1478	1387	46	1748	571	457	441	399	102	987	706	723	417	963	594	553	63	330	950
AF001_147_D0	SNP	772	1666	902	533	932	68	3008	668	306	612	576	402	1530	416	1442	416	1175	616	1053	465	368	1439	914	170	448	548	1456	865	1870	2972	2792	92	3502	1154	914	884	836	206	2930	707	1456	836	1938	1196	1110	126	660	1916
AF001_149_D0	dada2	342	488	536	340	527	153	873	627	122	318	261	262	460	518	963	198	474	663	666	479	218	537	1406	109	414	219	405	287	510	1078	742	811	954	411	462	331	241	98	802	468	541	294	643	392	363	84	458	511
AF001_149_D0	SNP	711	978	1116	684	1062	306	1765	628	244	636	529	526	920	1044	1932	402	950	1332	1347	967	438	1074	2822	220	836	444	818	575	1025	2168	1488	1640	1909	828	934	664	488	196	1870	473	1084	590	1287	796	728	174	918	1028
AF001_151_D0	dada2	315	559	462	247	331	180	913	722	154	512	195	292	717	493	1022	188	630	682	310	818	210	497	491	223	355	117	353	320	721	931	923	916	1236	445	499	268	254	79	971	553	595	374	550	342	387	543	601	519
AF001_151_D0	SNP	654	1119	982	497	669	362	1861	733	310	1031	392	594	1458	1022	2086	378	1267	1372	646	1651	424	998	987	456	714	238	726	642	1449	1917	1882	1852	2478	892	1000	538	512	158	2304	561	1196	760	1106	690	774	1096	1204	1064
AF001_152_D0	dada2	349	465	410	247	330	161	1029	645	136	328	227	291	565	405	994	313	0	567	606	728	103	461	1230	96	312	173	362	243	621	1228	815	656	1023	408	513	246	238	84	943	518	589	307	507	414	416	323	346	732
AF001_152_D0	SNP	750	938	913	533	688	338	2086	712	276	675	464	608	1172	841	2024	654	6	1180	1248	1517	210	930	2519	200	638	347	736	490	1274	2518	1728	1392	2136	850	1046	506	554	178	1923	525	1212	642	1091	856	838	696	714	1516
AF001_154_D0	dada2	201	717	364	133	228	25	1169	689	115	344	182	345	559	329	1201	171	465	503	466	230	151	615	857	34	168	150	517	316	828	1570	1024	137	1374	502	512	268	208	54	1101	475	619	256	732	438	385	97	316	729
AF001_154_D0	SNP	411	1438	744	373	458	50	2362	692	230	692	366	696	1122	676	2420	346	930	1008	941	474	306	1234	1718	68	340	302	1036	634	1668	3162	2066	280	2756	1006	1024	538	544	110	2219	478	1244	514	1471	888	772	194	636	1470
AF001_156_D0	dada2	68	353	37	52	6	11	549	100	54	33	51	23	119	22	494	59	135	43	91	91	51	239	115	0	74	83	159	172	197	447	442	16	481	109	141	58	2	55	257	301	161	135	337	214	151	16	106	555
AF001_156_D0	SNP	142	706	82	104	12	22	1104	101	108	68	104	46	239	48	988	120	272	86	182	183	102	480	230	2	150	170	320	344	396	901	890	34	964	218	282	116	6	110	516	301	322	272	680	434	302	32	212	1112
AF001_157_D0	dada2	78	1219	180	134	66	12	1442	177	243	127	183	66	659	124	1075	146	320	146	376	350	157	978	315	67	265	163	679	574	152	1120	1506	29	1613	374	375	194	392	125	582	1013	992	471	1158	708	496	139	409	1135
AF001_157_D0	SNP	156	2447	370	270	134	24	2902	178	486	254	369	136	1319	252	2164	294	644	298	756	713	316	1958	640	138	530	328	1366	1158	304	2261	3052	58	3227	751	752	392	846	256	1320	1019	1994	946	2363	1430	992	278	820	2292
AF001_158_D0	dada2	312	724	265	169	250	29	1026	339	151	441	234	384	651	337	1002	206	499	493	674	423	150	674	225	0	209	158	515	388	448	1514	1084	534	1491	461	469	299	294	77	837	628	705	318	815	423	413	535	318	744
AF001_158_D0	SNP	646	1455	548	346	512	58	2064	347	302	894	468	782	1310	690	2028	418	1001	1010	1367	872	308	1352	452	2	422	316	1040	780	907	3047	2206	1086	2990	930	946	600	608	156	1693	632	1420	662	1690	858	830	1084	640	1516
AF001_159_D0	dada2	241	674	242	133	109	25	831	169	109	313	151	323	533	342	463	171	373	239	245	183	154	539	750	64	183	95	406	360	477	729	891	309	1055	480	429	259	237	65	467	392	519	274	647	439	339	104	279	605
AF001_159_D0	SNP	498	1358	500	266	226	52	1676	172	218	628	302	648	1068	702	938	344	750	484	494	372	314	1082	1509	128	366	195	812	721	966	1464	1808	626	2114	970	867	518	496	130	1055	393	1052	550	1318	888	680	210	558	1222
AF001_161_D0	dada2	256	2181	118	202	36	17	2609	182	468	172	205	88	571	143	1102	190	456	166	375	537	273	1852	1822	0	387	238	1468	1180	630	2272	3093	33	2926	341	575	432	0	92	595	1198	1695	834	1392	970	1028	54	231	2238
AF001_161_D0	SNP	514	4381	240	404	72	34	5243	184	936	346	416	178	1144	290	2210	380	914	334	750	1081	546	3714	3664	0	780	484	2940	2368	1262	4551	6217	66	5863	686	1149	864	0	184	1370	1204	3413	1669	2802	1950	2058	110	463	4500
AF001_162_D0	dada2	374	703	425	171	234	36	1057	523	139	431	222	295	796	418	938	229	4	666	1020	674	167	635	322	119	316	120	463	325	812	1580	1024	577	1329	500	522	209	319	74	914	600	597	382	880	397	388	341	412	797
AF001_162_D0	SNP	774	1411	856	342	474	72	2118	524	278	866	444	593	1598	850	1889	462	8	1342	2055	1363	334	1275	648	242	634	245	929	652	1642	3171	2066	1204	2664	1006	1046	420	650	148	2154	602	1210	768	1772	799	776	692	831	1602
AF001_163_D0	dada2	311	549	475	263	387	50	930	558	140	515	253	148	542	520	1029	192	4	601	525	4	179	524	325	154	352	187	400	314	665	1389	843	884	1190	424	575	279	271	122	873	522	630	313	733	343	455	515	417	858
AF001_163_D0	SNP	682	1114	1014	552	806	101	1914	578	284	1048	519	302	1110	1108	2089	390	8	1259	1081	8	370	1070	660	319	722	378	829	633	1368	2853	1786	1844	2432	870	1170	578	584	260	2132	532	1282	658	1532	715	926	1068	846	1768
AF001_165_D0	dada2	322	693	335	184	289	33	1225	604	126	408	279	282	682	533	912	238	532	591	677	421	191	569	737	7	213	174	614	345	663	1136	1129	349	1389	541	550	307	0	76	1114	644	649	300	906	505	472	133	375	876
AF001_165_D0	SNP	678	1392	702	368	580	66	2466	610	252	822	558	566	1364	1088	1828	484	1064	1196	1369	855	384	1147	1477	14	426	352	1244	691	1337	2282	2280	712	2786	1088	1100	614	0	152	2238	645	1308	604	1818	1014	952	272	750	1772
AF001_166_D0	dada2	235	837	91	126	40	15	1316	361	169	59	187	57	274	57	917	186	0	105	129	192	109	708	309	49	163	167	650	449	469	1837	1288	37	1589	224	282	349	293	35	1030	557	586	314	769	618	510	117	157	1050
AF001_166_D0	SNP	484	1683	190	252	82	30	2644	366	342	118	378	115	548	120	1836	372	2	213	303	388	218	1418	622	98	330	336	1306	900	1067	3691	2592	74	3184	522	566	698	605	70	2065	556	1178	628	1551	1247	1021	238	318	2120
AF001_167_D0	dada2	224	671	344	138	230	32	986	347	158	298	181	262	615	288	899	181	4	248	532	228	134	637	290	100	181	131	464	375	597	1480	915	476	1277	469	461	248	271	64	802	562	708	309	754	410	480	51	334	492
AF001_167_D0	SNP	563	1342	702	320	466	66	1980	349	316	596	404	630	1238	592	1808	370	8	498	1072	503	326	1276	674	202	412	264	937	752	1202	2961	1868	960	2562	942	926	500	564	173	1647	649	1426	630	1534	880	969	104	672	1024
AF001_168_D0	dada2	313	576	470	248	313	85	894	341	172	482	256	289	527	429	929	199	0	547	496	410	198	608	956	86	336	142	450	309	731	872	934	591	1105	396	567	374	263	118	755	206	597	334	682	392	438	121	401	757
AF001_168_D0	SNP	649	1154	960	506	628	172	1800	344	346	968	512	578	1061	874	1878	398	2	1100	995	829	398	1215	1929	172	676	286	900	620	1475	1749	1878	1186	2212	792	1142	754	536	240	1696	208	1198	668	1374	785	880	244	806	1528
AF001_169_D0	dada2	305	431	572	382	492	201	726	563	137	443	343	235	542	536	917	166	479	718	786	767	289	381	1372	203	659	241	310	229	597	695	691	821	1020	377	542	335	188	245	783	403	540	279	466	319	412	115	426	592
AF001_169_D0	SNP	626	870	1155	770	990	403	1456	566	276	888	688	472	1087	1084	1843	332	962	1452	1586	1547	586	762	2750	421	1324	488	624	458	1205	1394	1398	1648	2044	758	1088	670	393	490	1569	403	1092	558	936	640	824	232	858	1194
AF001_170_D0	dada2	398	568	714	599	799	166	990	628	213	486	425	344	675	662	1007	229	628	924	959	732	341	486	1251	205	780	267	530	249	672	1099	910	874	1183	400	703	484	241	285	946	360	651	390	589	375	481	1160	540	757
AF001_170_D0	SNP	827	1140	1466	1224	1612	335	2002	639	428	980	854	695	1364	1365	2023	464	1268	1866	1933	1502	688	984	2525	494	1566	542	1078	498	1362	2224	1848	1760	2378	806	1418	980	565	674	2221	359	1312	790	1215	898	968	2356	1082	1526
AF001_172_D0	dada2	231	758	178	77	131	16	990	223	110	144	124	241	488	158	777	107	62	94	346	116	97	658	261	23	99	100	561	339	382	1438	1006	55	1185	412	371	151	273	81	501	569	597	272	779	279	344	37	183	575
AF001_172_D0	SNP	472	1521	368	190	262	32	2000	223	286	422	276	484	980	316	1556	282	126	250	697	346	242	1322	528	58	310	204	1132	757	772	2891	2026	110	2372	829	742	426	574	164	1308	571	1200	548	1576	698	752	74	367	1170
AF001_174_D0	dada2	351	1035	216	144	133	21	1375	305	221	258	215	314	697	221	1235	216	433	137	378	252	176	952	207	73	194	105	830	556	300	1918	1361	111	1565	575	549	366	381	62	809	564	922	369	1078	567	582	83	157	918
AF001_174_D0	SNP	724	2083	441	293	266	42	2768	308	442	520	437	634	1400	444	2488	434	868	278	760	510	352	1910	416	148	390	212	1678	1116	604	3849	2738	224	3136	1156	1105	738	792	126	1942	567	1852	740	2185	1143	1168	168	316	1856
AF001_175_D0	dada2	121	1002	234	145	34	23	1028	202	229	297	186	83	766	144	839	220	453	164	262	268	163	821	196	0	174	139	719	536	354	929	1366	125	1447	568	533	344	316	85	521	487	877	356	1136	485	201	27	362	728
AF001_175_D0	SNP	242	2008	475	296	68	46	2064	202	458	596	374	168	1532	290	1690	442	910	332	524	540	328	1644	396	0	350	282	1445	1083	710	1860	2756	254	2898	1138	1067	692	670	170	1232	487	1766	714	2284	972	406	54	724	1468
AF001_176_D0	dada2	378	790	359	223	415	39	1372	577	153	409	217	341	797	300	1463	371	514	401	524	261	196	747	297	11	207	209	756	407	727	1857	1352	163	1572	648	587	370	368	66	1092	734	715	297	1066	506	523	236	350	1056
AF001_176_D0	SNP	788	1586	747	450	842	78	2756	585	306	824	439	692	1602	606	2950	756	1038	814	1065	528	392	1507	598	22	418	421	1529	820	1478	3757	2724	332	3148	1310	1180	742	750	136	2569	739	1430	604	2204	1025	1050	484	702	2128
AF001_181_D0	dada2	180	719	436	205	363	88	1066	367	160	546	230	410	784	473	1097	181	521	614	569	284	221	698	282	133	288	152	545	386	934	1510	1113	332	1475	582	691	256	314	70	794	502	683	344	704	448	443	818	476	603
AF001_181_D0	SNP	374	1443	905	422	738	176	2144	374	324	1106	460	823	1582	956	2204	362	1042	1238	1144	569	442	1403	568	270	578	308	1100	776	1894	3053	2269	670	2960	1170	1385	514	680	142	1862	503	1374	698	1430	912	892	1687	952	1230
AF001_182_D0	dada2	94	790	204	143	127	22	1502	451	162	95	239	60	527	102	1429	190	378	153	313	222	191	737	206	60	194	206	819	522	684	1339	1412	52	1797	446	373	247	335	73	915	528	757	338	1098	549	535	191	314	1101
AF001_182_D0	SNP	196	1585	414	290	256	44	3016	452	328	190	482	122	1058	208	2874	384	756	308	626	453	382	1476	412	124	388	418	1647	1046	1384	2689	2862	104	3606	898	748	498	678	148	2615	530	1520	676	2220	1106	1074	384	632	2232
AF001_184_D0	dada2	297	568	327	130	180	71	850	454	118	404	187	280	526	390	1011	179	323	467	585	410	181	515	353	63	280	113	388	271	574	1233	833	685	1167	385	455	213	219	67	706	508	607	246	608	265	321	263	350	669
AF001_184_D0	SNP	620	1140	672	334	362	170	1720	458	238	816	386	568	1058	789	2036	362	648	944	1316	829	370	1037	713	129	564	230	778	545	1156	2480	1674	1378	2341	779	910	432	479	134	1731	510	1220	592	1238	652	756	536	704	1352
AF001_188_D0	dada2	201	410	530	299	324	129	683	306	200	390	260	223	536	360	738	160	247	462	644	738	284	371	1025	119	750	138	301	225	552	592	713	756	1004	345	534	377	178	350	633	289	545	323	440	277	390	326	434	560
AF001_188_D0	SNP	498	820	1082	603	650	300	1380	310	402	864	522	446	1072	870	1480	322	498	932	1310	1531	618	744	2065	322	1502	278	650	450	1173	1206	1428	1522	2013	696	1070	764	415	712	1372	352	1096	650	912	638	782	654	870	1128
AF001_189_D0	dada2	244	381	467	393	517	177	670	455	148	347	248	182	531	449	733	143	449	548	678	659	261	342	1095	149	735	173	262	169	448	576	633	741	799	287	485	327	178	281	730	357	375	244	374	294	327	726	375	390
AF001_189_D0	SNP	502	765	955	802	1047	356	1360	463	296	696	501	370	1064	910	1474	292	902	1106	1369	1349	528	690	2213	302	1475	351	526	344	905	1171	1294	1500	1606	585	972	658	387	570	1466	359	754	494	769	596	657	1472	750	794
AF001_192_D0	dada2	364	882	485	238	338	51	1244	421	164	424	245	435	940	433	1195	246	618	606	901	377	196	765	395	180	252	187	652	485	685	1094	1263	727	1528	625	530	350	346	94	1082	506	792	389	1024	451	516	824	582	952
AF001_192_D0	SNP	746	1766	997	482	686	104	2507	427	328	852	491	880	1896	884	2402	496	1240	1226	1815	768	392	1530	798	364	512	376	1311	970	1388	2208	2574	1480	3059	1254	1062	706	718	192	2171	507	1590	784	2072	912	1039	1673	1190	1922
AF001_195_D0	dada2	337	515	468	234	398	82	968	648	119	396	206	312	496	537	1123	212	497	686	826	738	190	527	509	136	425	166	395	280	677	877	874	631	1118	397	531	254	210	71	917	465	575	331	665	372	380	287	477	674
AF001_195_D0	SNP	721	1078	970	476	812	166	2018	665	238	798	416	632	1020	1104	2260	430	1002	1396	1679	1521	386	1061	1032	286	858	340	826	567	1382	1829	1780	1281	2250	800	1071	514	458	142	2163	467	1164	672	1354	757	767	617	960	1414
AF001_196_D0	dada2	372	473	656	633	754	153	1032	526	173	348	415	268	558	491	975	215	485	753	762	574	337	460	1069	194	770	338	471	264	470	839	870	461	1103	456	618	533	185	271	857	393	591	395	651	403	453	519	430	639
AF001_196_D0	SNP	775	948	1354	1283	1524	353	2082	527	426	812	908	538	1118	1004	1960	432	1185	1550	1534	1161	798	922	2150	477	1552	685	948	532	948	1685	1760	934	2210	916	1238	1078	384	620	1947	395	1184	798	1322	816	912	1052	862	1282
AF001_197_D0	dada2	258	592	131	121	189	11	1030	333	124	79	190	110	329	99	780	130	216	143	233	170	121	536	194	25	129	173	547	302	240	957	953	47	1181	311	95	185	272	55	734	464	518	277	706	431	489	25	247	634
AF001_197_D0	SNP	536	1188	268	246	380	22	2091	335	250	162	384	224	658	202	1568	264	435	288	468	348	244	1074	391	50	260	346	1099	607	481	1928	1926	100	2370	628	192	372	573	110	1476	464	1046	564	1424	865	980	50	498	1276
AF001_199_D0	dada2	384	550	511	539	476	118	1038	349	164	306	341	139	715	488	908	194	545	432	561	549	158	510	507	180	645	273	424	294	262	946	902	224	994	480	588	397	211	310	811	475	588	469	576	429	507	538	428	676
AF001_199_D0	SNP	801	1102	1046	1096	956	238	2100	351	330	616	687	278	1436	999	1827	392	1099	872	1126	1107	323	1022	1020	370	1298	548	854	588	529	1897	1820	452	2000	970	1176	798	428	626	1636	476	1182	940	1166	866	1018	1084	858	1358
AF001_200_D0	dada2	481	690	752	703	812	106	1184	459	248	497	388	368	704	628	1029	282	780	681	822	736	413	630	750	76	916	375	581	322	688	1067	1032	419	1334	627	676	654	321	372	853	613	799	532	694	470	641	241	477	872
AF001_200_D0	SNP	992	1421	1520	1459	1632	211	2442	466	498	998	804	738	1412	1275	2098	566	1595	1368	1650	1490	832	1264	1504	152	1842	755	1188	643	1384	2138	2084	842	2678	1264	1358	1340	654	752	2015	647	1608	1070	1392	944	1316	520	957	1760
AF001_205_D0	dada2	430	591	718	690	654	128	1095	800	172	437	454	235	744	629	1160	372	680	823	858	597	358	535	1333	285	714	368	543	261	586	1049	1055	356	1222	431	602	461	254	288	921	390	548	436	762	412	535	108	373	1044
AF001_205_D0	SNP	902	1188	1499	1407	1335	258	2198	812	344	878	924	474	1499	1279	2339	760	1378	1684	1734	1208	718	1073	2691	587	1438	744	1088	527	1193	2111	2146	743	2449	868	1212	924	542	588	2192	391	1106	880	1557	842	1074	218	749	2104
AF001_206_D0	dada2	266	638	129	58	141	13	585	116	101	194	137	195	363	165	775	125	284	137	184	137	160	375	222	81	169	99	524	226	387	593	730	111	746	267	510	203	228	82	298	447	406	206	468	386	404	45	223	465
AF001_206_D0	SNP	544	1280	312	160	344	26	1174	116	202	388	326	395	734	330	1554	254	572	274	438	326	320	752	449	167	338	204	1056	452	792	1194	1490	280	1493	536	1020	406	568	164	771	447	816	412	944	776	810	94	452	948
AF001_208_D0	dada2	216	1086	200	102	150	16	1097	72	197	240	204	323	676	134	672	184	476	114	522	294	101	817	257	21	214	124	621	671	668	1042	1339	60	1312	431	355	291	329	74	259	573	979	427	1061	497	372	14	422	946
AF001_208_D0	SNP	494	2176	477	204	302	32	2210	83	396	560	408	734	1356	320	1354	432	952	230	1058	663	232	1638	518	42	430	250	1250	1346	1478	2099	2700	160	2630	988	714	582	794	152	630	575	1970	855	2147	1098	868	28	850	1907
AF001_210_D0	dada2	291	791	354	154	159	32	1063	256	206	545	233	441	799	291	971	344	477	326	564	316	174	771	673	80	175	117	587	481	463	1735	1107	601	1548	464	608	305	325	80	821	588	915	366	711	459	490	371	425	580
AF001_210_D0	SNP	590	1594	714	308	355	64	2138	257	412	1096	535	882	1604	626	1944	750	1045	660	1191	685	350	1546	1346	159	404	239	1272	962	933	3484	2422	1210	3103	1040	1222	644	658	160	1790	590	1842	740	1584	924	1040	748	850	1274
AF001_214_D0	dada2	303	981	391	96	134	29	1037	211	239	598	211	472	926	334	1162	342	531	354	862	647	192	828	408	64	250	100	546	473	940	1823	1194	940	1690	506	713	257	49	78	786	755	913	370	936	493	449	65	556	769
AF001_214_D0	SNP	618	1972	793	218	312	58	2082	237	478	1202	473	954	1864	682	2337	730	1138	800	1726	1360	384	1657	816	128	506	200	1104	948	1899	3667	2396	2006	3400	1014	1429	562	98	156	1580	757	1832	740	1884	990	950	130	1114	1544
AF001_216_D0	dada2	19	106	99	79	41	21	26	12	63	28	55	29	87	18	28	29	52	119	44	77	37	60	370	28	157	31	23	26	52	35	105	123	200	34	28	53	0	79	13	13	143	44	42	11	55	188	131	49
AF001_216_D0	SNP	40	214	206	158	82	42	54	14	128	56	116	58	175	38	58	58	104	242	88	156	76	120	744	56	314	66	46	54	104	72	212	246	401	70	56	108	0	166	26	13	290	90	86	22	110	378	265	100
AF001_217_D0	dada2	349	931	362	167	154	26	1254	416	211	310	214	331	741	158	997	223	556	240	369	296	172	845	299	37	203	132	790	470	625	1197	1235	303	1697	596	516	374	0	82	1059	504	800	340	945	463	554	31	349	857
AF001_217_D0	SNP	713	1861	738	336	308	52	2521	416	422	626	428	666	1488	318	2004	448	1122	484	740	596	344	1695	602	74	410	264	1584	942	1260	2403	2482	610	3398	1200	1039	754	0	164	2127	505	1608	684	1907	928	1111	62	698	1728
AF001_219_D0	dada2	155	544	588	220	170	113	538	561	386	399	125	119	283	241	557	141	376	327	215	509	230	322	1988	73	1099	61	228	138	543	1081	679	465	1311	213	414	247	68	805	621	341	495	210	205	91	345	441	486	431
AF001_219_D0	SNP	318	1096	1199	470	344	226	1094	563	774	884	287	238	598	486	1124	282	758	688	446	1033	502	658	4215	148	2307	122	494	277	1178	2172	1488	998	2627	466	833	496	142	1634	1336	341	1018	420	434	184	694	888	976	868
AF001_220_D0	dada2	152	523	410	319	183	125	679	550	337	306	145	125	406	256	408	114	274	563	209	352	278	683	2409	9	1236	78	317	170	454	625	749	436	1120	245	225	179	47	884	630	244	432	217	144	59	369	750	611	316
AF001_220_D0	SNP	322	1048	846	648	372	251	1368	555	674	614	290	257	818	522	822	232	550	1140	422	713	556	1368	4861	18	2476	162	640	344	910	1258	1514	876	2256	496	450	364	106	1782	1269	245	868	434	288	120	742	1527	1232	636
AF001_222_D0	dada2	231	482	387	426	181	112	664	552	285	343	143	123	387	193	551	112	368	439	245	487	206	387	2626	108	1192	119	254	185	458	1097	505	481	1200	273	306	153	65	1126	725	283	483	225	210	91	417	711	430	337
AF001_222_D0	SNP	470	968	792	875	368	226	1340	556	574	742	306	248	778	532	1104	226	742	898	542	984	472	778	5277	243	2562	239	536	374	929	2223	1022	970	2417	556	614	338	132	2312	1816	284	972	454	442	198	874	1510	953	680
AF001_223_D0	dada2	209	673	569	326	277	133	232	387	257	311	270	179	421	375	468	202	374	596	481	333	257	733	2644	8	1271	145	177	189	506	238	682	678	1493	218	378	266	143	926	466	110	992	274	249	104	353	863	801	377
AF001_223_D0	SNP	432	1352	1181	664	562	268	468	392	518	627	550	362	842	766	954	408	760	1212	979	680	520	1472	5320	19	2564	290	356	378	1024	479	1390	1388	2991	444	758	542	300	1881	1067	111	2006	558	516	208	710	1769	1615	764
AF001_224_D0	dada2	349	513	454	243	389	206	845	659	145	527	247	303	566	542	1142	189	515	553	881	1009	213	456	1273	166	519	153	398	261	621	864	826	1171	1172	369	661	237	259	117	900	528	607	302	502	343	443	729	498	644
AF001_224_D0	SNP	722	1028	923	488	782	415	1704	666	290	1056	496	606	1136	1104	2290	380	1037	1112	1772	2037	426	912	2551	343	1043	309	800	524	1250	1728	1677	2356	2352	744	1324	476	520	234	2114	528	1220	606	1010	688	890	1474	998	1294
AF001_225_D0	dada2	273	539	287	125	189	42	731	221	117	330	148	210	506	494	376	142	305	333	340	187	94	530	186	81	139	70	429	265	386	729	850	590	981	391	375	198	236	49	558	309	501	241	640	276	343	11	279	616
AF001_225_D0	SNP	564	1082	583	250	378	86	1472	224	234	662	300	426	1014	1002	762	284	615	674	686	376	192	1061	372	164	278	141	858	530	776	1460	1716	1182	1964	788	752	396	492	102	1300	309	1011	482	1292	558	688	22	562	1238
AF001_227_D0	dada2	306	597	370	208	229	34	1212	409	120	297	156	336	645	507	1127	181	410	522	662	521	178	518	387	81	161	162	498	318	750	1176	982	552	1183	517	199	257	206	42	994	382	517	288	732	398	386	610	348	1195
AF001_227_D0	SNP	636	1235	754	422	464	68	2434	410	240	596	315	675	1294	1040	2260	366	822	1052	1326	1049	358	1039	778	164	322	332	998	638	1514	2360	1992	1112	2376	1040	400	516	546	122	1998	384	1038	576	1480	802	772	1232	698	2414
AF001_228_D0	dada2	187	677	373	180	352	50	1181	328	175	412	245	291	901	455	1206	202	490	582	435	384	193	638	613	95	205	186	502	368	470	1046	1010	329	1268	516	565	284	292	97	761	627	712	347	824	412	408	672	388	913
AF001_228_D0	SNP	498	1360	821	388	800	100	2366	328	352	986	544	606	1808	950	2426	404	983	1176	954	841	386	1414	1226	212	498	377	1100	739	1048	2098	2224	664	2544	1166	1130	594	608	194	1652	643	1430	762	1746	945	910	1360	780	1834
AF001_229_D0	dada2	299	572	365	208	419	32	944	578	103	274	221	111	428	276	978	181	396	540	515	163	172	440	710	116	214	175	447	264	475	939	864	354	1061	436	475	264	222	54	1086	216	556	285	731	322	341	630	381	669
AF001_229_D0	SNP	618	1210	746	420	842	66	1950	580	208	548	474	226	903	594	1985	362	822	1088	1040	353	344	900	1422	234	430	352	934	528	954	1892	1754	708	2124	880	950	556	456	108	2193	233	1119	570	1553	654	682	1274	762	1368
AF001_230_D0	dada2	334	958	289	186	183	16	1371	324	129	285	204	167	747	319	1405	170	548	285	453	191	154	865	649	59	222	179	681	501	791	1639	1392	219	1626	608	252	346	312	67	870	728	751	362	1021	492	543	44	218	980
AF001_230_D0	SNP	687	1916	586	376	434	46	2766	325	378	574	474	378	1540	642	2820	378	1099	572	914	526	342	1731	1470	171	450	360	1400	1004	1598	3388	2798	438	3256	1230	534	716	749	134	1948	732	1530	726	2108	997	1090	90	436	1972
AF001_232_D0	dada2	418	566	462	381	564	97	1222	639	175	313	459	222	585	572	1265	234	547	365	530	411	308	665	433	0	532	356	507	305	454	1080	990	291	1246	430	172	260	260	148	910	521	652	389	836	471	537	143	339	1069
AF001_232_D0	SNP	891	1132	935	780	1144	194	2464	641	354	626	920	446	1173	1170	2538	470	1094	730	1065	830	618	1334	871	4	1068	727	1018	612	924	2163	1996	586	2504	862	347	524	533	302	2068	521	1308	786	1678	942	1076	286	680	2154
AF001_233_D0	dada2	371	640	463	213	315	97	1030	851	150	548	216	336	725	471	1299	216	572	669	1091	870	227	541	1217	113	426	149	441	288	751	1492	1030	1076	1394	431	726	282	294	99	1193	483	674	383	559	382	400	967	590	690
AF001_233_D0	SNP	828	1294	943	474	658	193	2068	854	300	1100	439	679	1540	1016	2611	472	1228	1354	2195	1922	456	1089	2627	250	922	305	886	577	1516	3036	2164	2166	2793	910	1454	566	655	198	2650	483	1348	774	1236	765	860	1952	1252	1388
AF001_234_D0	dada2	222	464	633	353	389	182	827	584	336	422	263	169	436	370	783	184	466	567	318	647	305	480	1713	167	879	168	413	242	479	664	814	516	1390	275	548	409	130	893	623	277	695	234	307	140	306	722	462	419
AF001_234_D0	SNP	459	976	1295	718	780	364	1671	587	674	866	526	338	874	744	1576	388	938	1142	678	1340	610	980	3444	341	1765	343	826	484	958	1419	1700	1034	2792	572	1098	818	268	1802	1248	294	1390	468	684	388	612	1464	926	866
AF001_235_D0	dada2	343	823	297	222	281	25	1150	467	128	348	187	343	722	363	1268	240	0	547	809	797	138	629	285	0	252	141	499	399	556	1051	1159	524	1453	547	616	249	287	69	965	471	701	359	816	443	470	36	426	543
AF001_235_D0	SNP	706	1650	600	448	566	50	2331	470	256	696	374	686	1448	736	2553	484	4	1098	1628	1605	276	1262	570	4	508	282	1002	798	1116	2112	2344	1061	2915	1100	1236	498	614	138	2255	471	1408	720	1646	890	944	72	852	1088
AF001_237_D0	dada2	186	479	294	332	224	151	1122	716	271	560	202	155	515	304	624	174	581	312	642	486	250	526	3055	4	1079	169	365	294	964	1250	784	490	1132	380	416	281	119	771	1001	549	567	509	444	206	539	431	471	468
AF001_237_D0	SNP	386	960	598	674	448	307	2266	719	545	1120	411	310	1035	610	1250	354	1166	626	1287	983	500	1052	6133	8	2168	342	730	589	1944	2504	1576	986	2275	762	834	566	243	1556	2010	552	1138	1018	896	414	1084	866	944	946
AF001_238_D0	dada2	346	757	377	212	268	58	1131	349	143	379	221	312	848	461	1237	365	540	575	696	873	155	622	414	124	311	189	581	399	734	999	1181	490	1337	592	601	320	317	75	795	676	712	347	1003	491	488	673	500	578
AF001_238_D0	SNP	723	1516	766	428	544	116	2276	351	286	760	446	624	1699	930	2486	732	1084	1164	1402	1765	310	1247	831	248	624	384	1166	800	1483	2002	2375	982	2678	1192	1206	648	650	150	1900	678	1432	696	2019	984	981	1366	1002	1174
AF001_240_D0	dada2	388	708	351	296	440	33	1428	641	136	219	330	207	543	231	1356	193	275	275	436	179	218	618	414	128	276	284	613	359	432	1499	1154	106	1329	441	459	395	278	101	1060	537	663	345	919	554	510	175	381	1165
AF001_240_D0	SNP	817	1416	724	592	886	66	2876	651	272	440	661	472	1186	474	2728	396	552	564	877	618	436	1239	834	262	554	576	1239	722	874	3014	2331	260	2676	888	929	798	598	204	2326	541	1336	692	1868	1109	1094	358	765	2354
AF001_248_D0	dada2	307	730	414	294	375	65	1408	816	150	344	339	329	668	319	1333	252	524	659	390	241	181	637	290	171	235	249	623	347	588	1274	1237	178	1593	556	232	352	299	82	1081	478	630	393	858	512	534	692	341	1141
AF001_248_D0	SNP	654	1460	854	594	758	132	2834	829	302	692	683	663	1340	660	2672	506	1048	1330	786	497	364	1286	582	348	474	501	1262	695	1186	2557	2492	356	3213	1114	464	716	647	166	2868	484	1266	792	1754	1043	1074	1410	688	2310
AF001_249_D0	dada2	181	713	347	168	314	37	1212	261	85	321	186	269	632	357	1052	190	368	442	505	206	145	630	388	49	161	118	588	340	576	1425	1094	245	1297	616	462	255	311	52	748	580	637	218	911	433	383	184	269	717
AF001_249_D0	SNP	445	1430	734	392	632	76	2444	287	248	736	412	658	1266	794	2108	380	742	1016	1017	473	290	1262	777	196	326	316	1218	682	1293	2865	2204	574	2604	1236	928	512	658	150	1690	581	1282	558	1854	870	771	372	584	1454
AF001_250_D0	dada2	164	541	425	243	366	89	1173	719	90	238	270	323	561	448	1249	304	478	620	803	349	137	575	694	110	242	212	498	265	715	1097	990	403	1204	552	537	242	241	56	1076	556	485	333	846	371	416	272	355	912
AF001_250_D0	SNP	350	1086	873	486	740	178	2354	721	180	478	540	650	1133	912	2504	614	960	1250	1619	708	276	1154	1396	222	484	432	1004	531	1436	2201	1998	816	2412	1110	1076	484	492	114	2165	557	978	666	1702	750	832	552	712	1832
AF001_251_D0	dada2	315	565	417	226	420	34	947	714	100	333	186	255	499	447	1059	171	359	604	798	465	122	445	961	115	273	188	527	0	636	1329	979	239	1029	476	514	182	270	74	779	409	433	300	772	421	424	1063	346	787
AF001_251_D0	SNP	654	1133	847	456	846	68	1910	716	200	666	375	520	1005	908	2120	344	718	1222	1603	934	244	893	1929	230	548	380	1056	2	1278	2662	1974	486	2070	958	1030	364	542	152	2137	410	872	602	1554	848	851	2144	694	1586
AF001_252_D0	dada2	286	770	334	197	270	27	1519	586	138	294	237	250	721	105	933	188	0	497	292	192	164	680	511	112	165	178	611	394	376	1889	1251	73	1492	531	383	296	368	50	1235	729	654	300	996	503	464	93	303	733
AF001_252_D0	SNP	607	1547	696	414	548	54	3054	593	288	590	480	508	1456	214	1881	376	4	1002	588	388	338	1368	1038	224	332	360	1229	792	762	3803	2542	146	3000	1076	765	602	790	104	2491	732	1320	602	2052	1011	930	190	614	1492
AF001_253_D0	dada2	479	547	524	516	492	107	1081	610	173	370	457	265	675	513	1080	191	9	796	594	455	295	473	678	145	594	354	480	264	408	1348	946	440	1157	499	561	438	262	173	1082	361	618	380	770	437	450	373	456	894
AF001_253_D0	SNP	986	1098	1064	1040	994	216	2174	613	348	745	914	534	1354	1058	2179	384	18	1602	1192	920	590	949	1357	300	1192	723	964	530	820	2702	1904	891	2322	1000	1122	882	529	354	2173	361	1246	762	1560	879	902	752	916	1804
AF001_254_D0	dada2	197	820	406	447	459	66	1619	1037	170	483	402	355	825	560	1483	307	693	734	765	349	243	682	420	9	382	362	716	391	705	2075	1322	155	1609	650	693	519	329	138	1246	540	793	461	920	611	693	123	441	1318
AF001_254_D0	SNP	412	1645	853	931	942	132	3266	1054	340	978	815	720	1660	1144	2991	622	1403	1488	1558	721	490	1367	858	20	769	730	1440	786	1440	4188	2742	315	3254	1312	1399	1052	733	284	3127	542	1612	928	1885	1246	1400	256	884	2688
AF001_255_D0	dada2	407	699	548	322	589	48	1266	944	120	403	309	356	759	431	773	241	7	873	845	527	209	658	569	131	267	227	572	312	548	1268	1230	516	1473	551	423	330	331	80	1017	639	684	350	836	398	488	451	241	972
AF001_255_D0	SNP	843	1407	1119	655	1194	96	2548	947	242	806	620	716	1525	882	1560	486	14	1762	1703	1067	418	1320	1142	264	534	454	1146	624	1104	2542	2486	1044	2955	1106	848	660	674	160	2907	643	1382	706	1684	798	978	913	484	1956
AF001_257_D0	dada2	355	663	256	267	427	35	1307	578	121	237	253	392	572	257	1343	215	479	286	618	221	166	667	345	3	186	195	539	353	273	1199	1127	149	1328	493	445	265	296	74	1119	680	641	357	1034	506	481	17	316	713
AF001_257_D0	SNP	736	1330	522	536	858	70	2634	579	242	478	512	791	1150	520	2704	432	964	582	1237	456	334	1336	695	6	374	391	1079	707	552	2413	2267	299	2661	995	889	530	602	148	2246	681	1288	716	2076	1016	967	34	636	1430
AF001_258_D0	dada2	353	490	415	169	401	43	1164	648	108	383	191	271	532	341	961	136	94	640	750	554	173	427	376	36	223	165	305	248	444	1278	863	383	1083	463	457	243	214	50	1043	288	491	282	552	384	411	95	360	836
AF001_258_D0	SNP	728	983	846	438	813	86	2336	654	216	768	390	544	1070	694	1936	354	190	1290	1505	1126	350	857	830	72	450	395	776	500	898	2560	1739	772	2173	928	918	488	434	100	2097	289	990	570	1115	772	824	250	722	1682
AF001_260_D0	dada2	305	560	334	153	308	38	1016	343	104	352	173	317	580	232	930	173	344	397	573	309	136	503	108	39	211	155	433	300	479	933	980	342	1130	482	335	228	248	41	786	519	521	280	748	358	380	156	251	614
AF001_260_D0	SNP	642	1125	690	308	622	76	2050	352	210	708	346	648	1170	480	1872	350	690	818	1153	626	274	1014	325	83	424	312	876	602	966	1884	1982	688	2260	966	674	458	514	82	1824	520	1048	576	1534	728	764	316	504	1238
AF001_261_D0	dada2	322	611	345	163	249	56	1037	409	89	417	156	318	596	392	1097	270	445	552	659	299	107	570	441	84	161	131	495	312	628	1039	1003	359	1141	473	409	241	269	33	793	600	559	308	821	257	405	236	354	665
AF001_261_D0	SNP	672	1226	723	332	504	112	2134	413	178	848	312	638	1194	806	2212	558	894	1116	1332	606	216	1141	884	175	322	266	1032	624	1267	2096	2028	860	2292	950	819	484	561	102	1863	600	1162	622	1717	518	816	488	712	1398
AF001_262_D0	dada2	319	532	374	252	425	31	1041	618	98	236	187	284	600	340	1111	209	391	640	373	242	167	420	188	24	233	206	522	275	565	960	874	277	1122	445	388	271	192	83	835	522	544	280	739	393	422	228	272	546
AF001_262_D0	SNP	678	1074	794	516	858	64	2104	633	198	472	382	588	1204	702	2262	422	792	1324	761	489	338	847	380	48	470	415	1052	552	1148	1929	1806	574	2260	894	785	550	430	176	2019	525	1100	562	1507	802	854	471	550	1112
AF001_263_D0	dada2	386	626	262	308	300	61	1307	817	112	404	287	273	638	522	1379	382	0	723	754	296	188	601	235	0	288	278	618	297	383	1188	1080	157	1339	444	181	333	285	83	1224	615	606	348	790	518	520	456	354	1040
AF001_263_D0	SNP	804	1258	542	623	602	124	2634	829	224	818	576	548	1282	1060	2785	780	8	1454	1517	595	378	1203	476	0	580	562	1244	597	770	2382	2174	318	2685	896	362	668	596	168	2458	621	1218	698	1602	1043	1042	922	714	2084
AF001_264_D0	dada2	140	664	257	310	263	45	1294	837	139	234	282	137	539	319	1347	182	461	294	434	277	203	546	920	127	241	299	610	316	456	1254	1213	112	1372	457	410	414	279	145	1250	666	630	368	832	487	458	132	307	1038
AF001_264_D0	SNP	288	1333	537	626	534	90	2614	845	278	468	572	280	1082	650	2715	364	925	598	875	566	406	1097	1845	262	484	600	1234	636	928	2521	2446	228	2758	916	822	836	570	294	2505	670	1268	740	1674	984	918	268	616	2094
AF001_266_D0	dada2	222	791	373	199	251	26	1324	438	139	362	208	303	640	342	1175	185	3	349	505	289	163	638	475	79	181	176	551	417	831	1623	1057	278	1214	503	449	338	298	76	1001	715	660	332	983	505	456	375	332	690
AF001_266_D0	SNP	456	1590	765	404	506	53	2660	442	278	728	422	615	1282	700	2358	372	6	704	1014	588	328	1280	956	160	368	358	1105	834	1677	3254	2140	562	2437	1012	902	678	608	154	2014	717	1322	670	1980	1016	913	762	666	1396
AF001_271_D0	dada2	448	643	432	321	526	78	1172	797	130	351	279	283	651	648	1239	223	579	764	831	349	226	516	439	42	368	236	563	326	629	1644	1133	289	1351	505	611	385	291	126	993	439	616	369	812	476	471	336	425	953
AF001_271_D0	SNP	922	1292	881	643	1062	156	2356	800	260	702	561	572	1306	1322	2487	458	1160	1550	1671	708	452	1036	886	84	742	475	1132	652	1272	3293	2278	580	2711	1010	1223	770	596	254	2624	439	1236	738	1630	958	944	680	854	1920
AF001_273_D0	dada2	355	930	442	231	241	59	1274	377	190	616	322	453	935	459	1082	287	642	707	914	492	215	774	1003	21	353	148	592	446	759	1092	1262	546	1544	689	713	441	391	91	986	847	724	382	993	478	573	507	513	522
AF001_273_D0	SNP	726	1868	926	468	486	118	2568	381	382	1240	647	916	1881	938	2174	578	1298	1426	1855	1000	432	1552	2018	43	714	300	1188	898	1537	2192	2556	1114	3105	1384	1428	890	868	184	1986	850	1464	772	2012	969	1156	1030	1031	1070
AF001_274_D0	dada2	242	524	199	141	259	22	947	500	103	307	185	131	542	284	747	149	366	422	586	207	110	474	537	0	166	90	349	293	566	876	912	362	1086	349	440	228	213	37	963	349	466	271	595	244	377	310	316	463
AF001_274_D0	SNP	496	1052	403	284	518	45	1918	504	206	618	374	264	1089	582	1542	298	734	856	1177	420	220	953	1078	2	334	182	726	586	1144	1800	1852	738	2178	705	884	465	460	76	1998	351	934	552	1198	492	756	638	633	954
AF001_275_D0	dada2	311	729	563	312	441	223	581	417	272	609	341	295	707	542	859	215	513	700	687	662	340	569	1773	203	1247	137	330	259	706	537	759	1025	1528	361	618	433	229	1170	605	330	876	323	414	206	426	15	741	515
AF001_275_D0	SNP	636	1463	1152	630	884	446	1172	419	546	1222	686	596	1421	1098	1720	434	1028	1408	1381	1336	682	1138	3572	416	2503	276	662	520	1422	1074	1530	2066	3061	726	1238	870	479	2376	1379	331	1752	648	841	418	853	30	1490	1036
AF001_276_D0	dada2	345	830	426	141	285	40	1179	479	123	435	258	327	751	492	1193	249	362	551	736	312	160	715	340	144	236	176	668	454	534	1121	1274	374	1436	605	581	236	355	102	1072	649	751	316	915	474	543	344	402	940
AF001_276_D0	SNP	720	1666	878	382	578	82	2376	479	360	874	524	660	1516	1028	2413	500	724	1132	1476	640	388	1432	782	291	540	354	1364	914	1072	2247	2590	758	2885	1220	1173	560	742	208	2161	651	1518	750	1850	950	1088	758	810	1908
AF001_277_D0	dada2	293	470	512	320	381	207	533	279	153	380	257	242	438	485	648	185	445	535	582	644	228	329	1050	238	743	188	311	208	493	421	574	694	749	340	525	329	161	748	584	275	606	247	392	217	342	604	423	417
AF001_277_D0	SNP	602	942	1047	643	770	418	1080	279	392	762	521	486	878	986	1308	374	895	1078	1176	1302	462	659	2111	477	1490	378	624	420	1002	842	1163	1406	1503	682	1054	660	338	1526	1173	276	1221	496	795	434	686	1216	851	844
AF001_278_D0	dada2	334	573	515	449	449	201	772	258	188	476	297	261	578	571	789	225	557	557	801	887	349	527	1478	149	996	196	387	286	634	714	753	688	1084	438	651	547	220	732	673	461	675	377	583	257	465	651	552	700
AF001_278_D0	SNP	702	1150	1070	914	910	404	1564	258	434	956	604	526	1162	1166	1592	454	1118	1126	1608	1801	748	1058	2983	302	2002	394	784	572	1274	1435	1534	1402	2171	882	1309	1101	450	1486	1351	462	1356	758	1180	629	966	1327	1106	1408
AF001_279_D0	dada2	306	748	239	5	236	42	1114	456	173	529	281	384	853	440	1321	259	5	370	865	460	180	689	912	168	268	202	568	414	553	1624	1173	400	1411	621	652	293	316	74	911	673	698	385	834	477	525	140	385	927
AF001_279_D0	SNP	643	1500	490	10	474	84	2242	457	346	1062	564	778	1710	884	2661	518	10	752	1742	934	364	1380	1834	341	538	404	1144	830	1114	3262	2374	806	2830	1250	1305	590	673	148	2161	677	1406	772	1686	959	1050	284	776	1876
AF001_280_D0	dada2	124	915	356	201	224	28	1334	419	172	393	279	418	870	315	1279	206	565	476	530	269	149	785	591	104	191	179	708	489	539	1253	1471	680	1624	627	601	328	384	67	1094	774	862	410	867	496	537	366	405	966
AF001_280_D0	SNP	256	1830	737	412	454	56	2680	422	350	786	564	853	1746	648	2574	426	1140	960	1072	553	304	1574	1196	213	384	364	1425	986	1096	2522	2972	1380	3266	1266	1209	662	822	136	2206	777	1736	824	1764	1002	1078	742	814	1966
AF001_281_D0	dada2	359	653	555	493	436	230	774	388	263	556	353	0	689	561	923	228	0	630	899	907	417	575	1584	216	1171	209	363	307	688	707	728	983	1238	406	705	519	235	986	771	462	698	398	588	322	567	454	583	684
AF001_281_D0	SNP	753	1307	1131	994	874	460	1552	390	526	1114	709	0	1384	1131	1852	462	8	1276	1810	1831	836	1151	3169	436	2346	422	736	618	1380	1418	1462	1976	2479	816	1413	1038	488	1984	1794	462	1400	796	1176	650	1134	914	1169	1378
AF001_282_D0	dada2	233	644	170	101	133	13	838	204	138	265	144	277	573	259	784	161	371	180	327	191	103	584	536	0	130	70	425	312	391	717	892	181	1007	379	372	211	270	60	490	377	578	270	604	348	331	237	260	584
AF001_282_D0	SNP	476	1292	347	204	270	27	1684	206	276	536	291	562	1153	527	1578	326	744	366	657	387	206	1177	1076	0	262	140	856	626	792	1442	1804	368	2016	762	746	426	558	120	1152	378	1159	548	1225	706	664	486	520	1172
AF001_283_D0	dada2	234	478	354	337	282	140	487	232	181	314	218	205	495	411	716	156	486	309	473	504	264	408	1290	135	769	176	285	284	488	526	497	406	1091	243	519	307	151	522	359	301	668	268	460	288	396	534	363	631
AF001_283_D0	SNP	488	958	727	677	573	282	976	281	502	630	538	414	992	834	1436	418	974	626	955	1031	532	820	2587	277	1546	358	572	568	992	1062	1000	824	2194	618	1042	760	310	1108	1088	303	1350	645	931	580	794	1076	730	1274
AF001_284_D0	dada2	317	678	341	116	185	48	884	453	140	574	223	310	687	425	983	215	481	470	453	682	181	613	552	139	278	123	415	321	604	1442	922	493	1230	386	528	237	262	58	875	400	654	271	739	371	405	55	497	710
AF001_284_D0	SNP	654	1358	694	232	370	96	1778	456	280	1152	449	626	1374	864	1972	430	964	946	906	1380	366	1232	1106	287	558	252	834	642	1216	2890	1876	1000	2466	784	1065	474	528	116	2094	400	1320	546	1490	750	810	110	998	1438
AF001_285_D0	dada2	471	739	565	260	469	107	1207	673	157	486	254	339	697	597	1252	255	4	748	749	459	240	724	1202	173	441	200	551	293	715	1097	1090	512	1365	562	614	305	301	93	1211	596	626	381	862	425	516	0	608	798
AF001_285_D0	SNP	974	1485	1156	526	944	216	2430	678	314	974	511	682	1400	1208	2508	512	8	1506	1503	933	484	1452	2410	354	888	402	1110	588	1436	2197	2186	1028	2735	1128	1231	620	615	190	2432	597	1258	762	1740	856	1034	4	1220	1606
AF001_287_D0	dada2	329	569	566	366	378	117	817	317	158	485	269	279	553	500	947	187	138	656	924	1113	281	503	1561	81	604	171	341	281	692	1061	840	565	1169	329	659	398	194	229	746	502	628	291	647	423	388	669	603	572
AF001_287_D0	SNP	670	1140	1155	734	760	304	1649	318	316	972	543	558	1108	1015	1907	377	276	1330	1855	2248	564	1007	3140	219	1210	389	688	566	1392	2132	1696	1138	2350	794	1320	800	500	464	1706	504	1264	586	1316	852	776	1351	1208	1152
AF001_291_D0	dada2	342	1003	431	160	223	29	1130	339	238	519	257	462	894	515	1277	262	0	541	643	1179	195	856	532	96	208	155	613	404	682	1980	1246	647	1639	620	749	316	356	66	818	776	929	440	962	528	500	729	503	663
AF001_291_D0	SNP	698	2016	885	322	452	58	2273	341	478	1044	514	928	1794	1056	2561	530	2	1098	1289	2376	390	1715	1072	193	418	318	1234	808	1372	3971	2522	1302	3287	1244	1503	638	750	134	1930	780	1866	882	1934	1076	1004	1470	1006	1332
AF001_293_D0	dada2	305	477	464	211	237	137	587	472	187	475	307	208	509	570	898	148	393	434	724	876	257	434	1216	198	698	172	297	227	531	642	714	758	1020	290	722	334	241	144	692	483	522	278	504	360	408	459	524	471
AF001_293_D0	SNP	622	962	948	500	548	277	1182	473	376	950	616	448	1096	1148	1958	332	864	974	1450	1758	566	871	2440	426	1404	346	600	454	1067	1290	1446	1522	2045	676	1451	672	542	366	1660	485	1136	556	1014	724	894	926	1054	962
AF001_294_D0	dada2	143	717	1217	217	209	67	570	60	347	605	204	107	412	224	416	195	333	701	121	345	400	554	1705	11	1117	184	310	87	259	322	1080	303	1945	178	311	432	81	1149	93	129	1123	129	152	82	59	1200	576	134
AF001_294_D0	SNP	296	1444	2547	442	422	136	1154	61	698	1220	414	228	832	456	835	392	667	1430	244	706	808	1114	3441	22	2244	368	626	178	526	654	2195	610	3919	358	622	882	180	2382	188	129	2286	266	314	164	118	2444	1154	272
AF001_296_D0	dada2	107	581	231	154	270	34	717	382	134	457	220	310	530	310	953	300	427	377	488	215	166	551	577	68	170	121	488	368	748	594	952	291	1223	509	360	230	304	60	854	405	558	299	721	407	415	64	273	685
AF001_296_D0	SNP	226	1164	466	314	544	68	1440	389	268	918	443	628	1064	632	1910	608	854	758	980	436	340	1102	1158	136	340	242	976	736	1519	1193	1920	584	2453	1020	721	470	625	120	1712	406	1126	598	1448	824	830	134	548	1376
AF001_297_D0	dada2	395	561	491	258	280	89	721	570	163	500	211	278	515	537	1018	186	520	618	922	904	194	489	1004	124	459	126	406	299	549	1194	925	616	1165	346	592	262	282	119	994	466	548	329	656	382	425	434	563	656
AF001_297_D0	SNP	801	1126	1011	524	560	178	1450	576	328	1012	427	556	1035	1088	2042	376	1042	1244	1858	1835	390	982	2019	248	920	252	820	599	1110	2402	1870	1246	2336	696	1185	528	572	240	2000	469	1106	658	1322	772	854	878	1130	1318
AF001_298_D0	dada2	452	837	459	160	179	35	935	467	146	569	213	341	769	587	1096	250	546	583	1008	445	209	764	360	58	303	171	644	450	986	858	1190	320	1599	601	579	281	342	70	918	457	768	407	942	476	514	78	449	627
AF001_298_D0	SNP	930	1675	936	320	362	70	1884	467	296	1140	431	687	1538	1188	2202	506	1092	1170	2018	892	420	1536	726	120	606	344	1294	901	1997	1728	2406	644	3210	1208	1162	562	718	144	2167	459	1544	814	1906	958	1030	156	900	1276
AF001_300_D0	dada2	290	660	403	183	157	35	958	391	135	356	192	304	589	413	1085	248	596	556	716	782	173	646	970	128	303	118	460	321	607	933	986	565	1264	402	551	266	269	80	922	408	647	336	738	375	435	549	514	724
AF001_300_D0	SNP	598	1325	822	370	316	70	1930	397	270	716	384	616	1188	840	2184	498	1192	1118	1442	1594	348	1294	1954	258	610	236	922	641	1226	1869	2028	1137	2530	820	1102	534	560	160	1851	409	1302	678	1488	752	870	1114	1030	1454
AF001_302_D0	dada2	239	390	428	283	377	128	532	350	123	341	214	166	290	373	603	130	0	468	565	610	219	308	701	112	458	145	218	204	378	548	531	606	725	244	411	290	185	181	574	302	405	225	376	227	290	360	351	364
AF001_302_D0	SNP	504	780	875	571	762	256	1074	353	246	684	432	332	584	754	1209	260	4	950	1134	1238	442	621	1407	230	918	292	437	408	760	1101	1066	1234	1452	488	826	582	374	362	1154	303	816	450	758	458	580	730	708	740
AF001_303_D0	dada2	256	710	736	283	246	149	327	230	341	495	253	242	516	409	406	437	448	434	456	402	339	495	1608	154	1024	168	311	269	545	274	585	654	1102	258	494	441	136	1182	229	159	1075	275	325	148	342	685	754	516
AF001_303_D0	SNP	522	1424	1490	570	493	302	662	231	684	994	508	486	1042	828	812	880	897	872	920	810	686	995	3224	309	2052	339	628	542	1096	552	1180	1309	2206	520	988	886	287	2392	458	161	2160	554	658	298	686	1386	1515	1046
AF001_304_D0	dada2	308	723	647	440	357	180	564	205	245	516	322	211	502	593	610	245	617	559	715	688	331	557	1715	261	1155	162	293	195	687	625	676	626	952	346	657	508	196	1243	397	217	781	354	385	198	434	523	687	620
AF001_304_D0	SNP	632	1453	1311	882	764	386	1346	206	492	1070	656	492	1004	1284	1300	492	1237	1126	1569	1416	664	1116	3525	529	2316	326	608	456	1378	1255	1408	1260	1904	774	1325	1026	402	2580	900	217	1638	710	830	396	888	1128	1379	1248
AF001_307_D0	dada2	181	361	543	312	522	189	138	174	110	201	229	212	258	433	475	78	370	670	325	340	155	171	697	180	549	100	140	146	159	79	390	821	256	209	541	378	221	845	229	95	357	130	127	81	224	1010	652	226
AF001_307_D0	SNP	372	729	1102	635	1048	386	284	174	222	404	466	426	518	890	954	158	740	1346	668	682	310	346	1401	362	1107	202	280	296	320	158	788	1658	520	419	1087	760	478	1702	462	95	716	262	258	164	448	2037	1313	452
AF001_309_D0	dada2	254	221	327	233	340	126	401	156	134	385	258	199	398	288	509	166	353	425	433	432	167	215	863	114	558	102	224	188	386	272	535	494	676	278	402	301	171	760	352	157	468	200	307	161	245	419	430	320
AF001_309_D0	SNP	528	446	666	468	686	254	806	159	270	770	520	401	798	586	1024	332	706	854	870	875	334	430	1729	230	1122	204	454	377	779	544	1082	994	1358	558	809	604	354	1536	710	157	940	402	618	322	490	848	860	650
AF008_002_D0_D	dada2	971	1116	1572	1652	2552	395	2507	2040	274	925	895	565	1216	1595	2567	526	1256	2294	1848	965	509	731	1963	480	1541	887	737	477	1315	2900	2254	1565	2537	897	1409	971	567	325	2503	1191	1155	714	1334	926	1070	2345	1259	1480
AF008_002_D0_D	SNP	2066	2240	3206	3343	5173	798	5040	2050	548	1852	1810	1138	2446	3244	5149	1058	2530	4606	3721	1975	1024	1462	3950	991	3094	1797	1486	957	2644	5809	4543	3166	5087	1802	2826	1952	1188	660	5014	1195	2340	1450	2690	1872	2143	4772	2528	2988
AF008_016_D0	dada2	312	607	397	204	293	35	1096	537	124	245	212	141	585	304	937	206	453	349	662	221	138	542	1139	128	183	214	493	311	710	1441	952	233	1276	506	541	296	297	79	1159	565	622	280	672	417	511	219	326	618
AF008_016_D0	SNP	647	1216	810	412	588	70	2204	539	248	492	425	284	1170	612	1884	414	906	698	1330	444	278	1085	2284	263	370	433	988	624	1428	2885	1922	466	2552	1018	1086	592	604	158	2320	569	1252	562	1353	846	1023	442	654	1242
AF008_024_D0	dada2	265	481	523	262	328	62	687	346	113	404	193	205	561	434	840	129	449	538	714	769	165	412	409	100	379	135	344	196	451	1048	673	795	897	367	467	256	204	102	643	387	459	243	476	301	358	573	417	564
AF008_024_D0	SNP	552	967	1063	534	666	124	1384	347	226	812	389	410	1126	892	1700	260	899	1094	1437	1551	330	824	826	200	766	271	690	396	906	2107	1357	1598	1805	734	936	516	422	206	1450	388	926	488	966	612	716	1158	836	1138
AF008_058_D0	dada2	178	764	247	174	187	25	1221	412	159	119	240	154	425	147	713	181	472	166	243	220	153	647	245	35	201	216	664	424	781	1695	1179	42	1401	519	332	123	343	67	1049	468	700	374	765	473	535	36	260	701
AF008_058_D0	SNP	366	1532	507	350	374	50	2460	414	320	240	482	308	851	298	1432	364	946	332	491	443	310	1296	491	74	402	436	1332	855	1567	3399	2384	86	2806	1042	669	246	696	134	2106	468	1404	750	1540	952	1072	72	520	1418
AF008_059_D0	dada2	139	910	56	164	130	20	1364	203	182	73	164	63	308	121	922	112	9	112	189	268	177	780	244	15	199	159	691	533	233	1212	1467	18	1472	289	323	402	410	59	650	723	803	386	956	556	526	20	184	1165
AF008_059_D0	SNP	293	1827	132	328	260	40	2744	203	366	146	328	126	624	244	1874	232	18	234	381	548	356	1576	490	30	400	319	1400	1069	468	2442	2979	38	2958	584	648	808	853	118	1311	728	1623	776	1946	1133	1054	40	370	2338
AF008_060_D0	dada2	366	686	262	304	574	42	1382	997	119	251	293	276	656	345	1362	192	439	377	515	226	174	679	913	93	224	255	535	321	467	1391	1285	93	1465	484	100	307	289	76	1018	441	604	350	926	540	545	265	287	1046
AF008_060_D0	SNP	774	1376	542	612	1161	87	2794	1000	238	504	588	552	1316	702	2732	388	878	758	1030	455	350	1360	1829	186	450	517	1082	644	940	2835	2585	188	2931	978	200	620	586	156	2963	451	1210	710	1881	1089	1094	536	576	2114
AF008_061_D0	dada2	336	722	475	210	349	125	1246	743	147	579	219	302	775	607	1271	210	0	326	751	1049	175	632	689	138	365	154	534	373	750	1136	1193	757	1400	614	622	181	333	77	988	659	702	380	742	460	472	375	537	900
AF008_061_D0	SNP	691	1452	970	428	706	252	2506	749	294	1158	443	610	1554	1240	2550	424	2	654	1516	2114	352	1269	1387	278	732	310	1070	749	1513	2281	2408	1530	2811	1232	1248	362	706	156	2653	662	1407	768	1498	926	946	758	1088	1818
AF008_067_D0	dada2	303	495	485	423	494	252	776	699	186	523	301	251	630	491	754	230	593	653	981	864	278	420	1746	194	771	145	347	235	704	1278	681	883	1104	315	685	416	221	572	955	528	650	371	494	363	407	590	533	357
AF008_067_D0	SNP	633	994	976	852	990	505	1564	701	372	1046	604	506	1272	1002	1516	464	1191	1320	1973	1742	556	844	3510	394	1550	290	694	470	1420	2558	1370	1774	2210	636	1372	834	464	1156	2256	529	1312	746	994	734	818	1186	1078	720
AF008_068_D0	dada2	251	337	498	298	632	156	1039	776	78	266	188	190	481	537	1110	172	350	793	792	575	164	316	598	75	390	250	248	195	469	928	806	569	932	354	433	228	151	103	1036	344	390	259	541	355	283	1061	415	837
AF008_068_D0	SNP	564	746	1030	716	1276	371	2219	779	158	652	394	416	1037	1222	2236	350	779	1672	1591	1352	332	693	1203	153	786	508	710	390	942	1995	1742	1154	1970	769	868	490	410	206	2077	371	800	520	1100	814	686	2146	837	1688
AF008_070_D0	dada2	269	462	441	250	456	50	869	523	79	349	184	134	525	534	997	202	386	686	565	490	160	427	211	73	248	196	417	230	480	1068	805	691	920	484	398	257	210	81	811	428	464	244	582	371	362	454	337	708
AF008_070_D0	SNP	568	924	890	500	924	100	1746	525	158	702	374	268	1052	1072	2030	408	772	1376	1136	987	320	859	423	147	502	392	840	462	965	2158	1620	1390	1852	968	796	516	430	162	1915	437	934	492	1174	748	724	918	676	1422
AF008_074_D0	dada2	254	420	318	138	191	48	700	334	97	357	160	241	576	442	893	123	498	363	726	720	180	453	989	24	276	77	318	214	556	1006	676	764	903	291	464	157	224	52	599	407	486	228	525	272	270	729	450	524
AF008_074_D0	SNP	531	840	642	278	384	96	1404	337	194	714	320	484	1155	904	1790	246	998	730	1454	1451	360	908	1987	48	554	154	638	430	1122	2019	1368	1536	1806	584	928	316	456	104	1370	407	972	458	1058	549	544	1472	909	1062
AF008_076_D0	dada2	269	540	400	175	425	44	1104	618	73	308	210	158	577	395	856	195	230	506	539	152	156	457	267	97	293	212	398	261	528	1134	986	276	1139	442	422	270	190	65	933	482	496	309	683	323	419	414	282	937
AF008_076_D0	SNP	572	1085	911	495	946	110	2244	627	210	618	446	316	1158	826	1794	392	563	1104	1151	545	312	920	668	192	588	427	873	524	1071	2434	2052	560	2286	892	846	540	500	190	2048	509	1068	618	1391	740	842	834	594	1940
AF008_082_D0	dada2	291	553	385	6	279	101	824	394	129	437	173	281	583	420	944	279	432	554	641	930	183	466	828	77	326	105	373	281	663	819	876	853	1013	451	625	229	260	59	748	391	527	290	589	343	348	336	483	521
AF008_082_D0	SNP	612	1106	780	12	562	202	1652	397	258	880	346	562	1167	848	1890	560	865	1114	1287	1882	366	936	1663	156	658	212	746	562	1334	1640	1766	1716	2032	906	1250	462	520	118	1777	391	1058	582	1188	690	696	672	966	1046
AF008_083_D0	dada2	273	474	420	207	294	126	775	499	90	293	164	225	621	435	424	160	0	524	762	735	151	428	609	157	328	94	335	237	576	711	791	776	1021	395	548	206	195	55	729	469	461	294	596	290	362	365	429	480
AF008_083_D0	SNP	560	950	851	416	594	252	1562	501	180	586	332	450	1244	884	854	320	2	1054	1532	1489	302	859	1219	320	658	188	676	475	1160	1426	1589	1559	2044	796	1100	413	404	110	1754	471	922	592	1202	587	726	738	860	970
AF008_084_D0	dada2	374	593	324	298	385	59	1227	554	138	369	297	312	621	571	1233	194	0	536	410	368	207	668	406	118	326	202	529	305	492	991	1032	129	1264	442	516	387	313	100	1051	538	634	312	751	476	486	34	409	911
AF008_084_D0	SNP	775	1194	664	600	782	118	2464	554	276	740	603	624	1252	1162	2482	392	2	1074	832	745	416	1338	818	241	654	409	1062	610	998	1991	2074	262	2532	886	1033	776	636	202	2110	541	1282	624	1511	958	972	70	820	1826
AF008_088_D0	dada2	230	417	442	158	196	50	724	464	149	460	169	229	609	315	885	161	466	414	787	893	151	432	424	19	325	116	327	261	627	724	810	993	1064	368	549	244	220	66	710	495	579	298	559	298	346	463	491	559
AF008_088_D0	SNP	487	836	892	318	400	100	1466	465	298	922	340	460	1222	640	1774	324	938	838	1579	1806	308	866	854	38	652	237	653	524	1258	1450	1634	2004	2132	740	1101	492	456	138	1694	496	1172	602	1130	604	693	934	987	1122
AF008_089_D0	dada2	89	483	424	238	371	28	1061	211	140	223	256	127	497	213	730	184	423	308	543	293	230	529	340	73	340	210	527	346	351	999	909	135	1094	492	393	206	228	88	555	409	657	346	716	428	471	42	436	887
AF008_089_D0	SNP	250	970	875	481	747	56	2137	215	282	454	514	254	1016	438	1470	368	852	620	1092	680	464	1060	683	154	682	423	1060	692	862	2017	1878	276	2193	994	791	440	594	244	1260	410	1318	694	1476	863	978	84	879	1874
AF008_090_D0	dada2	251	514	396	166	223	156	734	293	149	462	166	314	540	410	720	173	409	514	801	732	177	480	1031	117	273	78	335	231	661	658	724	920	1019	301	546	245	228	55	643	400	494	307	575	314	347	521	460	676
AF008_090_D0	SNP	512	1031	805	342	460	312	1476	296	298	930	332	637	1080	826	1456	350	820	1038	1625	1484	354	962	2079	237	548	156	672	466	1338	1316	1462	1871	2045	614	1094	496	482	112	1467	400	990	618	1172	630	700	1050	922	1364
AF008_092_D0	dada2	125	437	297	136	271	78	688	287	134	274	157	223	427	367	621	135	308	433	524	567	122	328	125	77	195	134	271	212	439	618	590	287	788	311	339	209	205	55	567	218	417	221	423	259	323	20	300	518
AF008_092_D0	SNP	258	876	610	282	548	159	1390	289	272	550	320	450	854	748	1244	272	616	874	1052	1157	248	660	255	155	390	268	546	426	892	1249	1196	580	1592	634	680	420	426	110	1146	221	836	446	857	520	648	40	602	1048
AF008_094_D0	dada2	185	605	205	142	262	20	791	231	138	172	198	40	527	224	1079	183	0	186	380	209	112	501	173	71	178	172	493	341	229	849	881	74	1021	414	344	233	249	53	613	510	518	254	822	420	417	11	340	719
AF008_094_D0	SNP	380	1215	420	286	534	40	1634	232	276	346	403	80	1056	455	2174	370	0	376	762	422	228	1008	352	144	358	348	989	683	462	1706	1790	152	2051	861	689	488	502	106	1252	522	1068	508	1711	876	834	22	686	1457
AF008_095_D0	dada2	116	1038	106	201	197	21	1555	241	245	107	278	78	517	95	893	100	369	180	314	313	197	956	261	49	220	242	866	570	187	2133	1526	42	1711	407	369	381	354	86	695	525	906	424	1316	631	643	25	301	854
AF008_095_D0	SNP	236	2076	218	404	398	42	3126	241	490	214	556	156	1040	198	1791	200	738	366	630	627	394	1915	521	100	440	487	1738	1141	378	4271	3070	84	3424	818	738	764	717	172	1632	527	1814	852	2664	1271	1288	50	603	1714
AF008_096_D0	dada2	115	1068	110	199	37	20	1548	196	160	133	84	130	353	0	1075	81	286	153	292	340	271	926	257	32	271	203	300	574	105	1410	1423	29	1597	321	138	384	392	64	723	737	839	503	1073	654	581	48	114	1042
AF008_096_D0	SNP	304	2149	236	400	76	40	3118	205	444	268	169	262	838	176	2152	228	574	310	584	685	542	1855	516	64	542	408	684	1213	265	2835	2886	78	3206	684	276	768	820	168	1537	740	1698	1018	2165	1320	1205	96	228	2094
AF008_102_D0	dada2	137	1202	29	63	71	25	1518	335	284	147	199	60	436	106	1343	140	283	117	248	277	219	1048	479	0	248	206	745	699	777	2196	1642	28	1899	252	337	164	345	65	1025	645	1049	530	1053	732	743	59	255	1056
AF008_102_D0	SNP	286	2417	60	126	142	50	3070	337	574	294	398	120	873	216	2698	282	570	238	502	561	446	2101	961	0	499	413	1492	1402	1567	4407	3302	56	3812	506	675	330	702	132	2062	650	2104	1062	2127	1470	1488	118	511	2132
AF008_106_D0	dada2	178	448	306	305	268	125	463	80	245	437	203	148	398	284	442	197	468	330	438	598	336	400	1457	180	809	112	304	300	599	945	489	593	693	287	421	388	110	705	276	274	528	310	339	194	322	439	433	530
AF008_106_D0	SNP	362	928	656	613	538	272	967	81	492	874	412	296	796	596	891	398	938	670	930	1211	674	804	3035	370	1701	226	610	601	1202	1987	986	1232	1388	577	844	806	228	1492	556	292	1114	622	722	388	649	880	869	1066
AF008_107_D0	dada2	243	767	346	150	319	31	1173	366	162	329	292	197	639	213	1211	255	476	216	420	246	165	809	878	83	190	206	621	408	464	1058	1144	91	1391	574	467	221	319	75	794	691	780	394	906	459	512	38	224	1133
AF008_107_D0	SNP	500	1538	708	302	647	62	2360	367	328	662	592	397	1284	430	2430	510	956	434	846	497	334	1626	1761	166	380	414	1306	818	984	2224	2386	186	2789	1158	934	444	664	152	1889	694	1578	790	1845	924	1068	76	448	2284
AF008_115_D0	dada2	261	535	383	406	413	176	713	133	228	415	298	207	555	461	652	187	531	454	687	692	304	526	1124	217	753	230	370	262	547	653	652	514	830	406	594	457	213	560	422	329	568	398	443	293	420	232	388	643
AF008_115_D0	SNP	542	1083	815	890	912	363	1448	147	494	846	599	419	1176	958	1316	376	1079	1000	1481	1424	614	1055	2420	443	1614	469	742	528	1238	1322	1352	1056	1674	830	1191	926	438	1230	933	331	1144	808	930	596	906	472	848	1420
AF008_117_D0	dada2	323	599	488	436	494	122	705	111	240	457	370	312	658	569	760	208	586	454	742	759	314	532	1299	0	948	227	409	293	576	493	685	565	865	441	664	503	251	460	263	439	591	385	598	322	463	159	502	816
AF008_117_D0	SNP	663	1201	989	880	992	244	1422	111	480	918	745	632	1320	1157	1526	418	1182	916	1490	1534	628	1064	2604	4	1913	454	820	587	1160	989	1378	1144	1730	886	1332	1006	506	930	620	440	1188	772	1202	646	930	322	1010	1640
AF008_119_D0	dada2	268	560	502	414	363	169	702	161	262	465	287	186	558	494	596	230	617	527	622	710	345	456	1864	144	954	252	384	329	698	706	681	570	988	379	553	449	134	928	462	359	638	370	532	215	456	648	484	534
AF008_119_D0	SNP	554	1122	1022	834	738	338	1414	162	526	934	580	372	1125	996	1199	466	1236	1062	1254	1426	690	914	3737	294	1917	510	774	658	1406	1417	1371	1152	1982	762	1107	900	272	1878	925	363	1280	742	1074	432	916	1310	980	1076
AF008_120_D0	dada2	262	441	515	401	454	170	755	175	189	409	320	249	517	480	694	182	532	521	688	765	322	383	1133	0	737	136	358	257	511	573	629	525	869	380	574	464	187	639	379	337	594	296	494	258	338	368	460	612
AF008_120_D0	SNP	542	884	1046	804	910	344	1514	175	382	828	646	506	1036	974	1392	368	1069	1048	1378	1547	644	766	2275	6	1480	274	724	517	1024	1153	1264	1058	1746	762	1150	930	378	1286	874	341	1188	600	992	519	676	746	922	1236
CQE001	dada2	282	365	485	449	1078	288	2822	769	108	277	176	162	394	539	1051	104	419	824	699	652	178	287	875	127	771	280	239	123	367	985	745	900	995	210	464	229	109	227	872	482	449	154	462	234	164	396	402	448
CQE001	SNP	595	734	994	917	2201	577	5692	777	216	554	498	326	926	1106	2120	208	840	1664	1418	1486	380	574	1753	259	1702	569	482	322	737	1984	1514	1808	2008	458	928	458	323	462	2146	484	908	308	937	568	362	800	812	904
CQE002	dada2	117	569	276	122	260	160	877	845	97	442	237	88	748	241	1373	81	429	499	741	1044	140	439	1624	57	1837	50	82	71	435	633	667	1008	1473	87	651	207	168	796	1197	432	640	169	286	428	179	227	589	96
CQE002	SNP	234	1138	562	246	520	325	1757	851	196	884	474	178	1504	488	2758	162	863	1016	1485	2116	280	880	3260	114	3678	171	164	209	878	1272	1338	2026	2956	176	1306	420	414	1606	2787	433	1280	338	584	862	358	458	1178	196
CQE003	dada2	414	514	604	734	1727	407	3795	990	124	463	464	217	605	711	1103	175	613	1070	1158	996	258	413	1573	207	1397	391	357	156	540	1410	978	1546	1190	266	706	327	206	300	1095	610	600	228	509	428	362	683	585	500
CQE003	SNP	856	1037	1226	1476	3509	820	7629	997	252	928	937	436	1212	1452	2216	350	1226	2162	2323	2011	522	832	3162	421	2810	786	714	312	1089	2824	1974	3130	2384	536	1416	658	421	606	2781	611	1202	456	1024	862	726	1377	1178	1006
CQE004	dada2	244	423	514	419	905	267	1613	683	100	299	374	127	471	486	928	125	464	809	806	820	183	345	1263	116	1127	204	177	137	380	607	790	861	1006	224	534	283	193	272	1045	448	395	176	310	350	252	836	449	377
CQE004	SNP	530	846	1051	843	1836	546	3244	691	200	606	748	254	944	982	1862	250	934	1624	1616	1662	368	696	2539	232	2259	412	356	274	764	1223	1590	1734	2019	450	1072	570	388	552	2102	450	796	352	626	702	505	1698	900	756
CQE006	dada2	59	761	127	60	153	101	555	961	141	544	204	65	904	118	1349	51	494	394	655	1225	96	481	2270	40	2269	75	38	91	528	1345	630	1353	1996	71	865	197	156	1477	1809	358	814	251	205	515	160	113	657	75
CQE006	SNP	120	1526	260	120	318	238	1112	969	282	1088	408	130	1815	280	2716	102	994	796	1324	2470	192	966	4579	80	4554	152	88	236	1061	2703	1276	2732	4002	144	1732	394	396	2996	3638	360	1634	504	414	1036	320	228	1320	152
CQE007	dada2	322	344	558	589	1212	290	1926	678	92	257	212	160	442	588	1050	136	434	950	770	630	173	280	456	155	709	378	218	135	338	672	723	759	764	227	439	242	165	207	757	313	331	164	438	299	275	1118	373	586
CQE007	SNP	688	690	1131	1186	2443	585	3870	686	186	516	431	325	888	1202	2106	278	868	1910	1546	1276	350	562	914	312	1423	763	442	270	682	1348	1450	1520	1534	458	880	486	338	414	1763	313	664	330	884	606	554	2276	746	1182
CQE008	dada2	246	312	427	350	846	221	798	507	94	301	264	127	387	467	861	117	368	648	665	764	141	285	907	106	794	192	175	112	320	447	580	761	762	202	430	182	142	171	705	428	335	130	413	291	198	655	343	276
CQE008	SNP	524	626	876	712	1718	442	1608	511	188	604	530	254	778	944	1739	234	739	1316	1341	1552	282	570	1821	212	1599	386	350	224	644	898	1172	1532	1525	408	864	369	288	344	1638	429	676	260	835	588	396	1354	686	555
CQE010	dada2	106	567	209	84	198	134	789	869	113	454	265	78	751	194	1433	70	398	357	726	1242	105	420	1765	40	1877	70	68	154	428	644	573	1202	1736	59	785	180	186	1096	1548	433	694	209	325	439	202	158	598	123
CQE010	SNP	218	1139	428	168	396	268	1582	876	226	910	535	156	1510	416	2884	140	797	722	1462	2507	212	850	3556	82	3764	140	137	308	860	1290	1152	2424	3474	118	1577	360	398	2202	3108	434	1394	420	650	886	406	324	1196	246
CQE011	dada2	313	352	581	561	1180	213	1905	760	93	356	274	172	509	622	1097	133	447	882	0	800	186	315	1164	183	859	276	239	148	395	659	752	1138	935	290	492	253	153	246	838	449	459	161	478	290	291	504	436	538
CQE011	SNP	662	704	1182	1130	2393	432	3832	762	186	717	553	347	1024	1274	2225	268	894	1786	0	1632	374	632	2340	376	1730	557	482	298	804	1324	1526	2320	1874	586	992	508	306	500	1979	449	920	322	978	582	586	1030	878	1078
CQE012	dada2	337	449	529	460	1142	331	1823	711	115	388	310	175	640	669	1092	135	474	869	901	995	167	324	1404	130	948	266	222	137	431	1181	783	1362	1009	237	617	220	182	213	891	524	484	182	496	348	263	1003	513	534
CQE012	SNP	717	898	1084	938	2333	666	3686	721	230	790	623	352	1290	1368	2221	278	952	1780	1823	2026	340	652	2840	265	1910	538	446	276	870	2387	1600	2790	2024	476	1240	441	385	434	2126	527	977	364	1006	706	526	2078	1040	1088
CQE013	dada2	16	781	81	24	58	71	240	848	117	541	89	25	1030	48	1263	25	339	156	327	1249	38	533	2096	11	1973	28	22	85	471	530	447	432	2363	20	760	115	148	2450	1887	303	937	253	94	535	84	31	647	25
CQE013	SNP	36	1569	164	48	116	142	483	861	234	1088	180	50	2062	96	2530	50	680	316	654	2541	76	1066	4226	22	3966	56	44	172	944	1064	894	868	4733	40	1522	230	310	4923	3781	306	1879	508	190	1078	168	62	1296	50
CQE016	dada2	312	432	510	444	1051	299	2127	756	91	404	328	156	548	539	1213	133	465	851	826	894	205	293	1348	138	1427	258	187	155	412	971	803	1287	1002	206	596	300	173	309	804	504	467	162	439	351	294	974	480	454
CQE016	SNP	662	868	1050	900	2153	600	4276	764	182	810	664	316	1126	1136	2441	266	936	1736	1666	1819	414	588	2710	280	2879	524	374	311	838	1964	1621	2620	2013	414	1194	626	369	630	2198	506	940	328	896	704	588	1986	964	924
CQE018	dada2	230	347	400	298	754	211	711	633	83	282	211	120	483	415	865	90	387	653	783	715	159	286	1127	84	965	152	173	106	321	927	617	888	776	179	431	221	132	145	759	403	407	119	316	272	170	609	358	203
CQE018	SNP	474	694	825	604	1522	430	1426	637	168	572	428	240	970	842	1736	184	774	1324	1578	1448	318	574	2272	170	1954	304	346	214	644	1876	1246	1806	1558	362	864	442	264	296	1824	404	818	242	644	558	342	1236	718	410
CQE019	dada2	7	884	32	8	47	36	87	754	126	534	62	7	1184	19	827	14	223	42	90	1097	21	541	2404	7	1781	30	8	64	392	784	248	188	3648	19	695	54	68	3222	2075	212	1109	248	38	435	42	0	623	4
CQE019	SNP	14	1779	71	16	94	72	174	783	254	1086	124	16	2426	38	1692	28	460	90	182	2318	42	1101	4928	13	3595	63	16	130	808	1603	524	392	7360	38	1399	110	162	6688	4234	214	2277	508	86	896	86	4	1265	8
CQE020	dada2	274	392	513	423	1157	287	1727	704	59	329	283	165	526	508	870	134	461	849	833	750	163	304	1264	120	1050	241	188	127	375	949	637	1036	866	201	554	208	153	191	966	380	419	146	317	315	247	864	441	452
CQE020	SNP	564	789	1048	854	2350	576	3461	707	118	662	569	334	1056	1037	1748	272	923	1712	1677	1514	328	610	2548	241	2112	490	378	256	750	1905	1290	2094	1736	408	1109	416	318	390	1944	383	844	296	641	634	494	1757	884	918
CQE021	dada2	375	448	658	609	1440	355	2094	866	113	419	385	214	581	718	1291	186	0	1083	1028	1038	222	364	1464	165	1234	334	223	135	475	1329	908	1254	1127	263	772	303	198	246	1020	577	486	243	505	413	336	1253	546	574
CQE021	SNP	786	900	1352	1238	2918	714	4212	875	226	846	772	428	1168	1464	2599	376	2	2204	2071	2096	444	736	2944	341	2478	676	455	270	958	2671	1820	2548	2262	528	1546	608	410	498	2563	581	978	488	1023	838	674	2552	1092	1152
CQE022	dada2	19	654	31	29	69	42	845	945	54	116	54	19	847	48	1462	19	113	93	354	290	124	529	447	11	489	16	97	57	126	163	665	361	1560	88	844	215	187	181	1550	102	662	55	253	121	50	169	668	149
CQE022	SNP	46	1318	62	58	150	90	1704	962	108	234	108	38	1699	98	2984	38	234	194	726	592	252	1068	912	24	978	32	202	116	258	329	1356	750	3131	176	1698	432	410	376	3117	102	1348	112	532	250	100	356	1346	300
CQE024	dada2	359	521	680	542	1213	333	1993	933	118	390	388	179	728	659	1432	146	506	1078	1010	975	173	384	1563	150	1466	264	291	153	479	1136	812	1115	1173	204	625	330	203	332	1076	384	498	217	505	391	323	969	523	492
CQE024	SNP	752	1042	1369	1096	2451	666	4016	937	236	912	782	362	1460	1356	2876	300	1012	2168	2026	1971	430	768	3143	299	2940	531	584	306	967	2284	1634	2238	2351	488	1252	662	415	670	2365	450	1008	434	1010	788	646	1960	1050	990
CQE025	dada2	272	410	475	432	959	222	1648	757	113	379	357	185	548	546	1106	147	0	811	848	862	171	362	1346	97	1266	229	192	140	445	1103	676	949	992	200	568	302	175	219	879	468	473	172	416	333	243	854	449	426
CQE025	SNP	566	824	969	876	1950	453	3312	765	226	762	726	376	1106	1104	2229	296	2	1638	1705	1762	346	728	2712	200	2564	460	386	280	898	2234	1362	1922	1994	404	1136	606	360	444	2098	470	947	344	857	672	488	1737	900	860
CQE027	dada2	425	457	683	649	1526	316	1310	873	98	378	279	200	532	784	1163	161	500	1092	824	724	233	350	1382	189	768	404	326	142	420	785	947	1224	1043	305	543	266	167	192	1096	76	427	235	480	356	338	448	454	768
CQE027	SNP	888	916	1394	1314	3108	634	2635	882	196	758	562	402	1068	1600	2342	324	1002	2198	1662	1484	472	704	2779	386	1538	817	661	286	844	1574	1910	2472	2094	614	1088	534	343	392	2213	76	861	472	980	714	680	912	911	1542
CQE029	dada2	374	405	576	505	1266	285	2705	734	115	392	351	181	456	671	1119	127	65	878	838	828	199	323	1112	147	1097	226	205	115	390	790	825	1055	948	185	603	260	156	199	881	507	452	174	477	340	302	715	477	504
CQE029	SNP	778	814	1176	1020	2569	574	5434	765	230	788	723	362	914	1356	2248	258	132	1778	1685	1694	398	647	2245	300	2214	556	416	290	783	1592	1662	2136	1897	438	1206	524	328	398	2002	509	910	348	962	684	606	1464	960	1040
CQE030	dada2	279	535	552	351	987	309	1982	915	109	480	345	185	651	543	1484	125	92	945	1059	1147	211	419	1731	121	1886	212	201	121	533	1422	932	1149	1350	186	721	324	174	389	1402	669	629	205	450	489	267	837	647	449
CQE030	SNP	590	1072	1125	716	2008	622	3996	925	220	974	692	372	1304	1098	3003	252	184	1906	2127	2329	422	845	3480	248	3788	430	402	293	1078	2880	1880	2326	2703	436	1446	752	424	783	2813	672	1260	410	908	985	534	1704	1295	906
CQE031	dada2	8	557	77	23	79	51	256	655	79	410	103	22	988	43	979	26	0	86	206	993	44	459	1703	7	1625	33	16	79	316	829	302	652	1905	26	636	79	124	2000	1005	222	679	183	96	390	91	0	506	13
CQE031	SNP	16	1117	154	46	160	102	512	658	158	824	206	44	1982	86	1966	52	0	172	412	2006	88	920	3427	14	3269	67	32	158	642	1661	615	1314	3823	52	1270	158	262	4020	2906	222	1368	372	196	784	182	0	1018	26
CQE032	dada2	296	466	627	485	1196	285	3167	689	100	374	342	152	565	584	1222	138	489	789	811	898	208	295	1300	149	1311	242	199	158	389	1024	751	1261	994	233	570	293	166	303	997	489	441	175	421	344	294	757	472	342
CQE032	SNP	636	934	1277	980	2417	573	6378	691	200	752	689	306	1130	1178	2452	278	978	1596	1634	1824	416	591	2617	300	2626	484	402	316	786	2056	1512	2582	1992	466	1140	592	344	608	1998	489	888	352	842	694	592	1536	946	692
CQE033	dada2	273	444	425	349	866	288	2102	744	100	374	298	142	583	526	1195	132	0	837	837	969	128	374	1236	126	1263	186	223	137	437	1086	739	990	1045	217	598	249	151	267	940	465	507	194	433	349	316	684	494	356
CQE033	SNP	578	892	912	724	1774	592	4248	776	202	764	607	292	1176	1098	2414	276	2	1740	1709	1973	338	758	2503	261	2566	374	454	277	894	2241	1550	2084	2104	446	1207	504	348	570	2102	467	1034	394	896	708	634	1436	996	754
CQE034	dada2	106	568	276	105	277	183	969	879	88	409	239	83	777	214	1351	64	451	528	696	1056	121	383	1636	56	1830	81	90	144	482	648	637	834	1314	100	767	218	179	605	996	443	601	173	342	409	187	221	541	109
CQE034	SNP	218	1136	561	216	558	370	1948	883	176	824	478	166	1556	442	2716	128	906	1072	1407	2127	244	766	3278	113	3677	164	182	288	973	1301	1288	1676	2636	200	1536	438	372	1222	2691	444	1212	346	690	824	374	456	1090	220
CQE035	dada2	352	373	765	741	950	330	2690	817	96	353	326	223	535	707	1244	173	537	1144	817	770	239	291	449	183	967	476	310	164	386	807	825	704	889	317	526	320	186	309	917	519	400	205	619	351	363	195	471	592
CQE035	SNP	749	748	1562	1488	1928	661	5404	820	192	706	660	450	1070	1450	2499	346	1074	2316	1636	1561	480	582	900	369	1947	964	622	330	776	1619	1662	1416	1780	636	1054	642	381	626	2079	518	806	410	1244	702	728	398	946	1196
CQE036	dada2	379	412	558	559	853	301	2456	703	89	338	321	197	478	0	1163	158	474	978	808	700	125	301	1078	144	743	358	302	143	404	729	753	882	921	333	554	277	156	236	998	476	430	192	516	325	349	773	453	713
CQE036	SNP	842	834	1222	1161	1762	611	5000	735	180	690	655	404	984	1363	2380	324	977	2036	1670	1469	252	610	2181	302	1502	736	626	288	844	1501	1562	1840	1861	678	1122	572	346	498	2037	479	887	394	1069	660	702	1646	930	1482
CQE037	dada2	384	384	719	748	997	354	2277	846	105	362	319	209	521	834	1172	173	499	1149	869	763	242	315	547	178	990	459	352	130	376	807	884	826	952	306	616	328	181	272	864	521	421	235	577	384	330	319	483	501
CQE037	SNP	815	770	1462	1500	2015	714	4576	848	210	726	648	418	1042	1692	2362	350	1004	2318	1747	1551	484	630	1110	362	1985	920	705	260	758	1617	1788	1654	1910	612	1234	658	378	552	2052	524	848	470	1164	777	662	654	970	1012
CQE038	dada2	530	535	985	990	1378	379	2793	1079	118	516	410	255	700	1000	1430	219	734	1605	1249	1077	308	486	1225	281	1228	601	352	214	593	1091	1095	1068	1425	433	687	438	249	291	1459	718	579	328	690	459	521	1355	690	727
CQE038	SNP	1113	1072	2001	1998	2790	764	5657	1094	236	1036	841	510	1404	2028	2868	442	1468	3222	2504	2194	616	974	2458	572	2474	1211	712	428	1188	2184	2212	2147	2854	873	1378	880	516	600	2926	728	1160	660	1389	924	1043	2750	1386	1468
CQE041	dada2	421	421	689	639	844	288	2294	837	128	369	323	206	608	796	1114	172	10	957	949	694	249	350	472	185	836	419	342	130	427	1195	956	772	1090	303	570	309	195	223	859	536	453	271	521	390	372	953	409	457
CQE041	SNP	892	843	1418	1292	1710	580	4612	845	258	744	649	463	1216	1706	2235	346	20	1936	1914	1624	498	700	946	376	1677	840	684	296	858	2407	1926	1556	2181	682	1141	620	406	446	2536	537	914	544	1048	788	746	1930	821	950
CQE042	dada2	352	318	649	608	1384	310	2124	682	91	352	307	182	435	708	1085	132	395	998	737	677	233	261	989	163	843	406	263	137	326	1000	696	921	794	310	456	305	153	315	810	436	372	184	419	301	291	839	414	737
CQE042	SNP	766	644	1347	1249	2852	630	4358	698	182	714	620	370	876	1452	2195	274	796	2032	1492	1390	470	524	1999	335	1700	820	534	276	656	2020	1422	1880	1605	628	917	626	318	650	1835	439	752	378	864	614	582	1738	836	1490
CQE043	dada2	391	349	667	667	1355	211	1086	677	110	342	321	169	492	728	1032	153	473	1019	783	706	212	290	567	166	755	422	284	141	349	1065	769	831	885	310	498	346	149	277	1022	454	410	210	455	337	360	1056	401	801
CQE043	SNP	827	705	1372	1363	2740	422	2180	679	222	686	646	342	989	1476	2076	308	953	2074	1577	1436	424	582	1141	340	1514	854	572	282	704	2146	1550	1682	1773	622	1000	693	312	558	2061	457	824	423	926	680	720	2144	804	1612
CQE044	dada2	285	271	446	484	873	178	2989	611	48	267	201	152	389	514	820	126	0	772	557	581	164	266	677	116	554	298	264	121	302	938	678	693	720	208	436	215	144	139	742	380	228	155	331	267	285	716	342	586
CQE044	SNP	606	546	904	982	1784	358	6014	612	98	536	407	308	786	1056	1646	254	4	1563	1121	1188	330	534	1361	244	1110	600	534	242	610	1883	1368	1412	1447	416	872	434	294	278	1492	383	460	316	674	541	571	1450	684	1190
CQE047	dada2	462	530	754	774	1558	282	3005	910	113	380	348	244	615	897	1446	211	662	1225	1004	864	250	389	1418	215	881	485	335	187	448	953	971	817	1185	412	682	366	225	268	1227	610	532	255	655	439	408	915	589	978
CQE047	SNP	964	1062	1543	1569	3172	575	6052	923	228	766	700	494	1230	1836	2912	426	1327	2476	2026	1742	502	781	2851	435	1774	974	676	376	900	1914	1962	1655	2379	826	1370	738	477	540	2466	610	1068	510	1319	890	818	1881	1182	1984
CQE048	dada2	445	435	805	943	1513	396	1785	910	108	429	317	266	596	791	1042	186	488	1153	914	752	291	329	1178	189	1001	367	339	124	500	952	935	1314	1155	393	669	378	177	313	1220	529	482	253	503	397	422	578	466	856
CQE048	SNP	940	946	1676	1920	3158	802	3603	916	216	866	770	536	1198	1740	2095	376	1214	2420	1846	1549	582	666	2377	391	2018	883	678	346	1020	1910	1886	2682	2320	793	1343	822	436	688	2464	562	978	516	1035	806	844	1169	940	1727
CQE053	dada2	409	365	632	601	1263	297	2297	700	89	362	305	227	501	607	1090	141	479	1016	592	711	138	305	636	163	710	295	336	107	388	722	738	985	926	269	516	238	123	224	1103	392	417	205	501	339	247	297	419	481
CQE053	SNP	864	733	1288	1224	2569	596	4644	703	178	726	614	462	1006	1476	2192	294	967	2052	1200	1457	406	610	1276	333	1426	771	678	274	780	1498	1512	2010	1856	542	1038	632	314	450	2226	398	844	412	1016	692	532	602	838	972
CQE056	dada2	506	406	780	812	1713	390	1396	898	83	421	365	218	598	801	1156	191	566	1218	1073	848	236	316	1438	204	907	474	376	176	447	1366	971	993	1110	351	684	406	181	299	1241	104	470	244	479	384	427	1277	523	687
CQE056	SNP	1051	815	1607	1643	3469	784	2808	904	166	842	741	449	1200	1620	2325	384	1138	2472	2152	1725	472	632	2883	412	1826	952	759	352	904	2738	1958	2012	2231	704	1375	818	388	608	2502	104	944	490	964	772	858	2596	1048	1390
CQE057	dada2	415	447	780	807	955	321	2628	804	102	390	389	197	536	876	1184	161	522	1327	17	853	218	324	1015	202	998	497	357	166	438	1409	958	962	1096	349	616	354	180	290	1255	632	454	252	595	452	365	983	520	653
CQE057	SNP	882	896	1616	1630	1940	649	5284	819	204	786	785	398	1078	1796	2396	330	1049	2702	34	1734	438	654	2041	418	2007	1002	714	336	881	2854	1934	1943	2200	712	1231	714	364	584	2518	644	910	506	1204	922	730	2019	1044	1350
CQE058	dada2	422	433	472	478	947	251	3515	803	108	372	307	224	433	647	1283	139	551	985	935	683	184	328	876	164	601	322	362	181	447	796	870	482	1047	350	612	313	201	156	932	529	423	242	566	421	383	0	485	662
CQE058	SNP	913	868	970	977	1912	505	7087	812	216	750	626	451	880	1318	2586	286	1108	2002	1902	1390	372	658	1776	339	1206	652	731	361	914	1604	1768	988	2106	708	1229	628	424	324	2190	533	854	490	1173	854	770	0	975	1334
CQE059	dada2	394	447	724	822	903	299	2580	800	82	336	342	210	658	906	1109	171	566	1251	850	742	223	415	366	210	912	444	319	154	401	864	880	697	954	348	557	338	165	329	930	536	442	242	504	406	343	166	502	605
CQE059	SNP	826	895	1478	1651	1839	601	5197	804	168	680	688	424	1318	1848	2222	346	1134	2534	1704	1506	448	834	738	427	1832	892	638	313	808	1735	1772	1408	1915	698	1114	676	340	664	2163	538	886	484	1014	818	687	336	1006	1222
CQE060	dada2	370	388	659	700	801	255	1281	796	109	378	335	187	528	825	1257	154	479	985	830	712	190	345	476	162	881	363	321	126	456	826	789	717	974	348	587	311	191	253	938	491	422	214	548	355	350	430	434	571
CQE060	SNP	790	777	1360	1405	1626	516	2582	803	220	756	678	378	1060	1690	2577	310	967	2010	1666	1456	484	693	955	339	1772	726	652	314	924	1664	1601	1454	1956	698	1180	627	402	512	2145	492	850	430	1108	714	700	878	873	1148
CQE062	dada2	379	465	633	592	1174	322	1337	762	101	383	289	228	634	739	1213	165	7	916	893	782	203	367	1232	164	688	350	334	162	460	755	883	1078	1040	350	581	327	220	201	956	581	471	250	668	384	121	994	540	741
CQE062	SNP	789	932	1300	1193	2372	648	2684	767	202	768	578	460	1272	1504	2438	332	14	1844	1790	1578	408	734	2474	345	1386	709	672	324	921	1516	1778	2189	2082	704	1162	660	469	402	2210	583	950	502	1357	770	244	2018	1084	1492
CQE063	dada2	546	453	766	781	1614	317	3432	874	116	391	333	243	602	814	1233	187	632	1173	1072	894	229	371	1389	148	945	498	344	159	492	1446	937	1184	1044	309	583	353	225	282	1258	650	482	259	594	446	123	1029	527	901
CQE063	SNP	1150	912	1569	1570	3278	637	6925	883	232	784	674	486	1212	1660	2478	378	1270	2372	2157	1809	458	746	2790	301	1901	1008	688	318	988	2909	1892	2406	2097	620	1170	712	467	566	2527	654	970	524	1202	902	246	2094	1058	1822
CQE064	dada2	509	503	806	826	1221	353	2440	917	93	466	338	261	614	908	1165	184	608	1280	1038	874	237	397	1052	209	904	483	378	157	563	907	955	1270	1135	364	636	341	222	256	857	638	499	251	626	408	431	233	573	648
CQE064	SNP	1088	1011	1632	1664	2504	707	4912	934	188	938	680	522	1234	1858	2356	374	1218	2588	2080	1790	476	796	2119	419	1816	982	766	316	1136	1816	1934	2576	2279	732	1272	692	456	522	2590	643	1002	502	1260	828	863	478	1150	1324
CQE067	dada2	900	950	1219	1056	1865	577	6790	1504	189	797	581	477	1145	1567	2358	374	8	2120	2007	1755	449	870	2501	340	1291	716	723	363	1112	2455	1799	1517	2152	814	1201	541	434	325	2178	781	986	524	1263	796	837	141	1010	1672
CQE067	SNP	1890	1900	2489	2128	3780	1158	13633	1510	380	1608	1188	956	2297	3162	4734	760	16	4278	4035	3560	900	1743	5018	688	2592	1442	1450	726	2246	4933	3630	3056	4310	1638	2407	1084	894	654	4372	784	1984	1052	2546	1597	1680	284	2026	3374
CQE069	dada2	356	331	653	669	1213	249	2034	697	93	324	271	195	398	709	1104	140	203	1080	532	761	218	278	1137	176	812	444	271	110	368	844	752	783	851	305	492	313	118	220	928	500	332	189	576	336	175	622	406	710
CQE069	SNP	752	663	1330	1351	2458	498	4089	701	188	650	551	392	796	1434	2214	286	406	2178	1064	1542	438	560	2284	356	1748	905	544	278	747	1703	1509	1578	1706	614	987	634	318	518	1864	501	668	380	1158	679	428	1342	817	1439
CQE070	dada2	351	373	602	617	1352	259	2243	795	103	322	277	206	477	797	1112	157	475	940	819	653	218	360	1303	139	743	417	331	140	414	844	780	751	913	292	554	273	172	232	946	551	392	182	601	357	353	941	467	566
CQE070	SNP	746	752	1335	1375	2737	525	4530	818	208	696	579	416	994	1742	2323	364	1053	2076	1660	1493	438	731	2622	288	1573	842	672	324	840	1728	1678	1544	1833	594	1121	566	360	492	2062	563	826	466	1234	720	708	1942	946	1228
CQE071	dada2	463	469	628	506	643	156	2719	807	102	387	269	245	587	858	1328	210	588	953	1036	594	207	411	218	123	608	329	285	196	566	1287	1013	460	1102	427	534	252	203	172	1088	561	496	264	617	445	394	101	486	817
CQE071	SNP	964	942	1280	1024	1300	314	5464	809	204	774	551	494	1178	1750	2668	424	1182	1924	2091	1206	414	825	440	247	1222	670	572	392	1146	2583	2044	934	2210	856	1070	506	423	346	2183	563	996	536	1242	899	792	204	976	1640
CQE072	dada2	440	463	795	794	1427	337	2465	913	99	469	405	256	661	882	1214	206	624	1341	1068	915	244	490	468	8	1026	474	351	162	590	952	1026	1008	1203	406	638	384	201	277	829	585	491	265	610	414	428	321	528	699
CQE072	SNP	942	926	1648	1609	2920	680	4967	918	202	942	814	518	1330	1802	2440	414	1262	2718	2144	1862	490	982	937	16	2077	958	706	328	1200	1914	2078	2058	2416	814	1280	772	436	564	2485	588	994	534	1240	843	858	650	1061	1408
CQE075	dada2	259	280	509	505	1106	283	2231	514	76	259	239	133	355	573	739	101	361	770	645	595	162	294	744	92	759	275	193	119	298	504	551	894	712	198	353	213	125	182	709	324	282	137	359	246	227	470	303	338
CQE075	SNP	546	560	1033	1022	2229	571	4494	521	152	520	482	270	712	1169	1482	206	724	1550	1296	1220	326	588	1501	187	1525	564	388	240	600	1015	1107	1814	1433	400	707	428	260	368	1419	325	566	276	730	501	454	952	608	676
CQE076	dada2	75	580	244	52	187	143	780	882	131	485	194	63	689	139	1463	54	274	359	660	1235	90	458	1773	47	2021	73	75	98	438	809	662	784	1599	62	792	171	145	1228	1492	405	711	195	247	464	86	119	611	109
CQE076	SNP	156	1198	498	162	416	292	1564	896	262	976	452	158	1458	448	2944	162	594	830	1339	2539	238	916	3581	95	4062	148	170	253	941	1637	1340	1592	3206	162	1627	420	374	2536	2996	411	1433	392	498	938	226	270	1224	222
CQE077	dada2	377	438	637	566	1362	324	1714	762	112	298	330	184	540	627	1080	93	498	1036	963	928	212	366	1494	147	1295	294	258	102	458	1163	895	1322	1036	282	605	322	193	180	1053	483	430	168	477	397	319	1117	486	583
CQE077	SNP	794	878	1293	1136	2764	781	3490	762	224	808	665	370	1080	1262	2172	298	1140	2088	1931	1881	502	734	2994	299	2604	591	522	337	930	2335	1798	2664	2079	569	1210	648	400	442	2117	555	982	406	956	798	640	2276	977	1186
CQE080	dada2	278	422	584	460	1060	323	1819	780	90	342	342	168	560	573	1035	141	461	914	845	896	205	353	1211	135	1197	237	242	132	433	685	723	880	1006	217	540	224	189	218	917	464	440	179	447	331	273	648	479	336
CQE080	SNP	585	846	1184	927	2148	648	3670	783	180	686	690	338	1122	1158	2080	284	922	1840	1690	1799	416	710	2422	275	2409	478	486	264	870	1374	1456	1768	2016	436	1083	448	388	442	2128	466	882	358	900	666	550	1316	958	674
CQE081	dada2	80	652	197	64	311	152	750	913	118	511	175	62	895	177	1277	58	442	283	694	1082	96	480	1943	26	2060	70	71	127	516	682	563	1127	1672	79	804	186	169	1157	1556	479	772	192	234	386	28	138	638	84
CQE081	SNP	167	1304	398	128	625	306	1506	918	238	1024	418	124	1794	358	2562	116	885	660	1396	2531	212	960	3900	54	4144	140	142	254	1034	1366	1278	2374	3357	158	1608	438	380	2330	3131	482	1554	388	472	865	56	278	1280	168
CQE082	dada2	331	431	428	530	1144	264	3022	747	104	358	313	174	601	578	1168	129	477	880	673	807	203	360	1365	149	1016	243	241	136	413	1055	739	1026	983	190	597	198	170	209	992	480	472	178	516	367	277	942	454	536
CQE082	SNP	689	864	860	1064	2314	624	6072	750	208	718	631	348	1208	1180	2345	266	961	1780	1352	1783	408	720	2744	302	2045	486	482	272	836	2147	1494	2060	1967	482	1198	504	354	422	1990	482	950	356	1042	734	554	1910	909	1080
CQE083	dada2	258	395	416	400	874	225	1675	652	96	271	353	135	531	363	1140	114	350	716	860	862	164	339	1255	102	1190	217	202	133	390	1021	741	1003	945	156	602	229	142	171	988	455	446	146	384	251	231	673	447	414
CQE083	SNP	552	790	969	812	1768	512	3368	653	194	694	708	270	1067	874	2292	270	700	1450	1728	1754	328	680	2524	210	2396	440	412	268	788	2060	1498	2022	1895	398	1210	458	300	418	1983	457	893	358	774	638	466	1364	896	832
CQE085	dada2	307	417	564	485	1172	295	2729	695	90	350	332	175	521	570	1147	121	482	883	818	950	225	332	1223	132	1338	263	194	147	455	1134	806	1424	970	232	559	293	156	234	901	507	478	180	503	392	286	928	459	335
CQE085	SNP	638	834	1152	981	2370	591	5488	699	184	706	669	354	1042	1166	2304	246	968	1780	1653	1919	450	665	2460	271	2687	532	390	294	918	2274	1622	2878	1947	466	1123	590	316	474	2108	509	964	362	1014	784	574	1891	918	672
CQE086	dada2	24	809	92	21	64	68	221	1000	131	552	179	33	997	106	1425	43	220	210	59	1467	64	635	2219	25	2317	53	32	125	541	844	566	743	2193	50	860	172	193	2339	1857	332	925	251	177	569	90	41	716	29
CQE086	SNP	80	1620	266	66	188	188	458	1009	266	1108	364	68	2001	238	2858	86	440	448	118	2974	128	1278	4465	50	4750	106	64	250	1086	1702	1140	1492	4397	100	1725	344	392	4696	3837	333	1852	504	356	1140	256	128	1433	82
CQE090	dada2	78	738	218	84	185	153	687	1053	141	628	237	61	951	185	1406	82	501	462	776	1355	95	517	2256	39	2306	67	79	139	556	796	729	1436	2134	89	816	235	219	1655	1322	506	834	245	238	503	179	163	689	72
CQE090	SNP	156	1482	452	170	378	308	1394	1063	284	1264	478	122	1906	382	2830	164	1002	928	1562	2767	192	1042	4541	83	4626	134	158	278	1123	1596	1472	2924	4281	180	1636	472	467	3342	3792	509	1680	490	480	1010	358	332	1380	144
CQE092	dada2	8	887	72	15	25	54	71	885	125	681	119	9	1227	42	1217	30	289	95	238	1297	29	603	2431	9	2373	41	20	95	394	982	356	413	2840	24	775	121	140	2923	2113	356	1051	274	67	524	95	17	675	25
CQE092	SNP	20	1780	157	32	50	110	142	896	252	1372	242	18	2472	84	2458	60	584	194	480	2641	58	1210	4928	18	4775	84	40	190	802	1983	728	844	5693	48	1549	242	290	5962	4275	357	2122	554	134	1062	190	34	1358	54
CQE093	dada2	274	402	511	465	1108	301	2597	628	82	350	268	180	457	529	1100	105	444	846	792	877	150	293	1284	154	1160	228	230	120	367	958	759	1290	843	229	556	270	164	197	922	368	386	180	422	348	230	886	435	422
CQE093	SNP	572	806	1038	942	2238	602	5213	633	164	700	541	362	916	1078	2214	210	888	1708	1588	1767	300	587	2579	317	2332	458	462	242	748	1921	1525	2608	1688	462	1117	544	341	396	1848	368	780	360	856	701	464	1796	878	844
CQE094	dada2	330	516	641	549	1404	308	2025	812	119	424	402	193	619	654	1305	161	502	886	1066	1044	180	404	1755	138	1185	283	255	162	515	684	859	1404	1143	268	744	233	230	214	1245	569	540	242	507	438	327	1029	590	396
CQE094	SNP	691	1034	1302	1107	2826	618	4067	818	238	936	808	422	1242	1487	2617	322	1116	1790	2140	2386	398	815	3519	282	2379	615	511	323	1040	1370	1732	2824	2292	618	1492	542	482	434	2497	570	1082	486	1017	878	656	2084	1179	876
CQE096	dada2	291	375	566	514	1174	273	938	650	96	338	254	193	452	563	1117	118	400	832	816	777	91	317	908	110	778	311	243	98	387	931	695	941	858	243	481	245	117	220	929	311	422	124	385	331	230	938	464	487
CQE096	SNP	624	752	1184	1049	2380	594	1891	668	192	682	524	390	1049	1218	2376	290	928	1776	1643	1623	310	636	1836	293	1574	624	490	272	784	1914	1412	1930	1732	492	970	494	328	450	1880	316	856	346	780	679	462	1944	937	1018
CQE097	dada2	14	1027	88	31	66	94	89	948	166	694	171	25	1366	74	1273	35	2	119	371	1737	39	650	2686	14	2586	39	21	100	564	549	535	1100	2972	40	1016	166	125	2509	1629	341	1178	303	91	654	4	31	878	41
CQE097	SNP	32	2079	190	63	144	193	178	988	334	1430	358	54	2797	152	2650	70	4	244	776	3623	78	1330	5610	31	5346	78	42	204	1186	1144	1100	2281	6050	80	2044	338	322	5557	4786	351	2394	620	209	1376	10	68	1799	86
CQE098	dada2	303	491	596	491	1112	249	1882	762	110	397	390	177	626	554	1064	130	181	790	942	955	193	336	1457	138	1261	278	207	114	519	1099	751	1037	1084	251	565	256	129	232	1065	536	461	178	384	326	244	907	533	536
CQE098	SNP	656	982	1213	988	2256	595	3786	765	222	796	791	354	1256	1127	2132	264	484	1598	1893	1958	388	677	2937	278	2539	568	416	295	1048	2223	1634	2096	2172	506	1135	593	318	468	2284	538	928	356	774	662	488	1840	1074	1118
CQE099	dada2	269	391	516	417	875	262	1797	675	84	337	256	148	485	428	1002	114	426	839	774	761	187	264	1277	105	1197	203	204	140	365	614	670	842	930	188	502	254	134	277	965	433	415	165	349	308	223	709	431	363
CQE099	SNP	580	784	1071	874	1796	535	3632	690	168	682	520	306	986	1002	2034	234	863	1732	1574	1593	376	535	2586	217	2410	409	422	282	736	1242	1378	1734	1875	390	1003	508	302	568	1944	440	834	332	704	630	446	1512	868	736
ID004001_D137	dada2	372	455	519	530	1004	368	1245	843	111	455	377	167	643	573	1121	237	564	1003	972	984	238	354	1443	145	1772	283	243	180	540	1100	856	1424	1264	217	699	168	209	468	1237	604	603	247	441	438	278	852	612	358
ID004001_D137	SNP	813	955	1082	1096	2127	781	2592	870	236	952	806	356	1322	1196	2302	492	1180	2100	2027	2072	508	727	3017	302	3646	594	506	368	1119	2316	1808	3014	2648	449	1464	350	468	976	2745	624	1256	510	936	916	596	1778	1266	748
ID004020_D0	dada2	195	193	386	237	555	184	272	269	57	214	207	102	281	401	577	96	289	493	452	472	109	156	579	78	621	144	137	85	266	338	412	592	539	177	363	98	99	181	511	169	234	120	199	186	169	514	289	237
ID004020_D0	SNP	426	404	808	499	1138	396	570	280	116	438	424	212	584	836	1182	206	597	1034	942	1010	306	316	1214	164	1283	305	286	180	556	700	874	1238	1106	364	760	204	216	380	1056	175	494	248	417	386	350	1068	607	494
ID004022_D0	dada2	76	306	170	67	124	99	569	1065	79	230	134	53	330	168	655	69	253	249	399	497	81	346	747	24	677	43	80	111	257	1414	469	387	899	70	318	72	100	299	1033	638	367	99	253	215	91	203	257	91
ID004022_D0	SNP	162	624	368	142	252	204	1184	1111	162	482	282	112	688	356	1350	140	536	516	821	1036	166	721	1549	60	1408	90	171	229	550	2967	970	806	1849	155	649	154	202	620	2301	654	777	214	520	444	186	424	529	190
ID004023_RVD0	dada2	155	194	316	318	583	174	370	305	49	182	210	106	239	0	454	159	255	451	373	418	142	140	400	81	546	163	155	74	186	378	355	377	441	122	284	150	102	198	434	202	253	121	148	151	173	425	225	257
ID004023_RVD0	SNP	350	402	672	662	1218	357	762	314	104	376	438	220	500	532	946	328	532	950	775	877	294	292	825	174	1140	345	330	152	392	780	746	790	920	260	588	316	212	410	892	212	518	246	310	310	356	892	470	536
ID004028_D0	dada2	99	294	254	73	136	55	273	77	122	288	163	91	408	252	450	166	383	209	504	670	119	291	579	40	677	79	86	129	353	774	490	355	686	174	447	135	110	481	267	431	416	163	281	267	126	197	355	156
ID004028_D0	SNP	214	612	526	164	284	112	557	78	254	592	346	186	850	552	934	344	806	432	1049	1402	244	608	1190	88	1400	162	178	268	733	1608	1016	740	1420	368	922	286	238	987	554	445	858	336	578	556	260	404	730	328
ID004029_D0	dada2	94	209	153	95	196	31	360	159	75	168	131	81	250	0	399	106	245	182	363	352	100	232	319	40	524	85	101	76	253	609	325	160	567	133	307	107	57	252	356	343	234	96	229	163	122	217	235	157
ID004029_D0	SNP	196	428	316	196	407	62	765	163	154	354	276	186	529	536	814	224	515	374	744	732	210	484	670	90	1099	170	212	158	524	1296	684	328	1176	282	630	224	123	524	738	360	482	200	474	338	260	450	506	326
ID004031_D0	dada2	210	196	271	252	370	161	438	381	62	233	145	117	292	192	597	140	265	430	471	461	176	169	570	73	417	122	124	87	256	461	405	499	549	170	337	100	113	124	554	216	269	123	300	130	164	505	267	220
ID004031_D0	SNP	451	404	562	516	786	336	912	396	138	474	308	244	597	414	1220	290	558	910	978	979	360	350	1195	152	855	258	260	180	540	960	844	1050	1136	354	702	206	242	256	1147	224	562	254	620	275	338	1072	558	466
ID004042_D0	dada2	173	215	410	320	558	204	502	400	84	227	189	103	315	356	632	90	244	472	454	455	149	207	707	95	547	133	164	113	232	640	419	492	655	186	303	108	96	208	601	318	240	130	314	168	196	616	252	293
ID004042_D0	SNP	378	436	858	666	1182	426	1066	411	170	460	400	210	650	760	1308	184	502	1000	950	968	312	424	1483	200	1142	276	342	232	482	1347	886	1026	1364	386	633	220	200	436	1234	334	502	280	664	346	408	1288	517	608
ID004052_D0	dada2	230	249	436	454	664	230	737	578	105	330	233	152	468	524	930	150	391	674	728	607	192	238	1081	128	664	178	241	133	409	782	613	744	827	257	461	119	164	178	751	351	391	171	413	218	272	887	407	456
ID004052_D0	SNP	496	512	912	936	1404	482	1544	605	216	682	500	316	970	1110	1930	308	796	1396	1533	1286	390	498	2266	279	1396	374	506	270	860	1630	1282	1564	1724	552	950	242	342	366	1682	358	814	350	840	458	564	1870	852	958
ID004055_D0	dada2	448	773	769	430	416	192	945	917	243	673	369	356	863	764	1046	336	746	735	1259	1167	310	586	1534	182	758	195	522	411	744	1502	1107	848	1603	500	656	245	323	182	1412	648	970	435	622	486	630	1068	729	605
ID004055_D0	SNP	964	1604	1621	908	866	393	1976	959	504	1410	772	752	1796	1602	2170	702	1568	1564	2632	2450	647	1222	3201	380	1566	409	1082	856	1579	3099	2325	1750	3393	1050	1362	502	676	388	3105	671	2040	908	1304	1008	1304	2226	1509	1254
ID004063_D0	dada2	117	301	281	140	183	121	1080	1455	89	239	145	101	335	236	521	85	292	349	452	515	142	366	827	61	625	74	148	112	389	1903	502	497	849	101	423	89	105	222	1064	756	390	137	268	189	156	244	285	182
ID004063_D0	SNP	254	618	590	286	390	245	2244	1516	182	510	300	218	690	494	1076	182	620	720	944	1082	292	768	1738	136	1286	152	306	232	815	3958	1048	1034	1752	206	876	182	222	456	2358	779	812	276	562	396	326	498	586	388
ID004069_D0	dada2	365	400	545	563	737	272	625	659	119	398	337	245	481	890	1154	199	551	923	871	788	303	331	1342	119	861	315	416	181	472	823	895	595	1015	330	457	210	215	287	945	421	469	274	517	354	416	1237	503	535
ID004069_D0	SNP	794	844	1159	1166	1534	580	1300	683	246	828	698	506	1008	1890	2398	416	1134	1944	1834	1643	626	676	2806	256	1787	656	870	374	978	1712	1864	1243	2104	694	944	432	442	590	1948	437	965	566	1076	738	874	2601	1040	1138
ID004070_D0	dada2	101	148	175	159	292	103	863	732	44	149	102	40	211	176	436	57	181	307	333	237	90	201	489	35	369	98	79	75	161	1077	349	231	510	56	192	55	90	181	646	442	222	102	223	101	92	394	138	200
ID004070_D0	SNP	220	309	370	334	610	214	1841	763	92	300	220	120	440	376	904	120	374	644	688	510	188	422	1038	88	898	204	166	150	394	2247	716	590	1054	148	402	114	192	374	1350	455	458	206	472	250	226	835	288	420
ID004075_D0	dada2	235	284	320	371	623	228	522	436	64	257	257	158	351	426	962	185	308	675	637	547	178	223	583	100	578	252	225	128	341	542	584	563	688	199	423	182	124	167	617	309	310	154	359	230	212	870	303	353
ID004075_D0	SNP	530	599	677	774	1318	482	1082	453	140	542	530	324	730	932	1996	388	638	1416	1329	1139	362	469	1221	209	1231	524	474	264	716	1146	1219	1172	1438	410	891	376	264	358	1299	323	634	326	750	478	440	1826	628	728
ID004077_D0	dada2	85	135	246	184	360	109	977	955	41	140	120	66	233	188	430	51	165	328	318	262	97	281	466	63	366	117	140	49	179	1411	418	278	494	111	212	57	57	167	839	601	209	102	254	136	112	427	187	206
ID004077_D0	SNP	192	276	522	376	754	227	2036	993	84	286	246	138	474	402	898	104	336	702	660	566	204	588	974	134	770	238	298	108	372	2931	872	584	1020	234	439	122	120	342	1749	622	436	220	530	282	232	894	396	430
ID004079_D0	dada2	114	117	184	197	304	102	297	190	31	119	122	73	174	216	425	89	149	327	291	250	99	98	186	54	245	131	111	52	168	307	256	268	293	89	252	83	67	70	347	141	128	90	187	103	89	441	160	154
ID004079_D0	SNP	246	248	404	412	644	208	634	201	64	246	255	146	356	484	870	184	310	687	600	518	204	206	378	116	512	270	228	110	350	627	532	554	606	182	524	172	134	144	721	146	264	186	386	214	192	904	324	330
ID004081_D0	dada2	90	459	130	112	198	86	989	1368	116	252	159	85	406	0	904	149	284	292	441	407	109	574	771	40	585	77	204	262	407	1944	1168	357	1947	84	319	105	117	129	1956	921	543	149	519	273	178	240	256	224
ID004081_D0	SNP	194	957	266	230	422	180	2066	1425	240	528	330	178	846	344	1884	302	588	606	928	860	228	1196	1602	84	1232	160	422	547	848	4095	2422	746	4030	174	661	224	252	274	4305	952	1120	308	1094	564	372	500	534	462
ID004085_D0	dada2	300	373	619	539	854	274	517	453	84	303	280	187	407	595	693	140	408	678	698	677	260	257	995	135	815	294	254	116	354	655	639	723	800	258	558	138	129	236	735	322	422	179	332	259	282	955	420	382
ID004085_D0	SNP	653	770	1283	1111	1810	581	1060	467	172	626	587	386	839	1236	1438	294	852	1416	1434	1422	542	548	2094	296	1698	599	524	236	732	1375	1328	1508	1669	540	1166	284	278	504	1531	336	870	372	690	538	576	1994	876	800
ID004129_D0	dada2	259	336	363	363	519	225	600	459	98	284	226	157	372	432	626	205	391	654	668	538	197	239	247	86	483	227	271	135	361	647	600	532	723	236	455	165	153	157	701	303	335	170	344	246	274	773	338	345
ID004129_D0	SNP	562	706	758	754	1094	468	1254	479	208	596	472	322	772	932	1290	424	798	1360	1396	1142	402	502	514	180	1005	470	564	282	746	1337	1268	1108	1491	494	940	336	324	330	1466	315	692	350	716	510	562	1624	696	710
ID004138_D0	dada2	207	239	343	334	611	223	362	353	85	208	243	95	282	0	640	183	263	503	469	526	192	230	577	98	606	224	147	94	260	560	487	545	602	143	365	177	100	225	586	289	311	118	274	167	188	651	341	299
ID004138_D0	SNP	455	496	722	711	1290	466	750	371	174	438	501	196	582	824	1316	378	552	1042	980	1098	402	481	1204	210	1280	458	300	200	534	1160	1019	1134	1268	300	790	376	214	470	1211	300	648	248	562	356	398	1387	702	628
ID004139_D0	dada2	187	196	275	286	527	102	613	491	52	214	162	82	314	0	419	168	259	503	449	315	107	192	157	58	287	217	181	115	226	618	559	179	548	111	252	125	103	88	654	310	222	141	253	158	177	591	218	350
ID004139_D0	SNP	404	418	591	582	1092	212	1264	514	112	444	337	178	652	620	872	352	530	1052	944	679	228	400	328	124	596	453	380	242	470	1280	1170	376	1159	230	522	256	218	190	1351	322	490	300	526	320	370	1250	452	724
ID004142_D0	dada2	269	357	308	341	420	193	416	500	122	380	293	185	471	422	795	253	412	628	762	681	199	399	402	131	530	177	262	189	454	636	617	664	776	252	546	201	177	149	758	359	440	216	414	251	323	778	441	295
ID004142_D0	SNP	570	743	644	704	876	398	868	526	254	774	599	383	978	938	1650	524	856	1306	1576	1428	420	826	851	276	1108	374	540	392	951	1337	1290	1372	1608	524	1134	420	374	308	1575	372	918	442	876	529	678	1634	915	614
ID004143_D0	dada2	335	419	765	612	961	295	1325	896	123	441	343	233	618	852	1403	165	577	758	1072	845	216	384	1241	129	847	491	372	177	506	1239	922	845	1139	404	529	151	212	170	1175	690	460	311	641	425	363	1704	517	699
ID004143_D0	SNP	728	878	1619	1284	2054	620	2784	938	252	908	708	492	1284	1819	2948	354	1206	1588	2255	1773	450	794	2576	274	1728	1016	764	374	1057	2588	1918	1760	2365	852	1105	318	458	356	2629	716	960	646	1332	879	754	3609	1069	1446
ID004145_D0	dada2	247	283	356	418	633	260	541	517	88	333	252	174	416	372	718	217	401	607	722	599	155	215	629	125	629	220	184	129	381	729	644	617	772	161	480	185	136	168	742	309	356	206	267	262	231	819	384	332
ID004145_D0	SNP	558	590	786	892	1342	536	1130	553	180	714	523	366	892	928	1486	468	828	1274	1510	1279	326	454	1313	267	1319	460	374	270	795	1538	1366	1316	1606	334	1010	394	302	356	1553	328	750	434	586	550	476	1726	804	710
ID004148_D0	dada2	298	316	445	474	737	272	609	497	100	337	296	172	435	0	880	206	415	746	736	657	247	276	573	133	722	318	275	137	357	622	572	692	774	260	514	253	141	225	755	371	375	186	453	266	287	1001	467	380
ID004148_D0	SNP	665	659	937	987	1542	567	1276	525	210	702	614	364	912	996	1830	434	862	1556	1538	1378	508	570	1220	280	1506	676	574	287	752	1297	1191	1428	1620	550	1066	528	298	472	1574	377	782	384	934	564	598	2094	966	798
ID004157_D0	dada2	226	298	468	317	408	88	745	480	67	241	168	146	362	526	738	133	371	697	570	511	125	314	682	58	429	251	247	114	302	790	620	355	737	250	232	85	133	76	781	251	328	173	483	268	250	938	328	439
ID004157_D0	SNP	490	621	973	660	848	178	1558	503	136	500	346	304	757	1114	1536	270	790	1456	1196	1078	254	644	1403	124	886	516	516	234	630	1654	1308	752	1540	522	480	172	286	162	1646	265	680	358	996	570	528	1956	678	916
ID004159_D0	dada2	315	373	491	468	712	253	597	587	110	413	351	206	523	544	956	267	446	719	803	682	304	311	562	158	732	210	352	176	483	753	720	703	860	320	557	225	182	200	829	396	439	218	509	278	364	981	473	438
ID004159_D0	SNP	671	767	1040	982	1486	530	1236	608	226	852	725	438	1072	1200	1976	550	932	1504	1676	1423	634	648	1182	330	1538	437	730	360	1016	1564	1494	1478	1774	678	1164	472	384	412	1862	407	896	444	1076	581	743	2066	976	912
ID004161_D0	dada2	188	231	306	301	508	164	519	407	73	227	178	128	301	0	654	179	306	460	526	462	146	191	502	77	494	164	192	99	243	657	444	488	608	162	364	146	108	171	590	263	249	103	315	191	180	621	255	259
ID004161_D0	SNP	424	476	636	622	1066	342	1076	421	154	508	410	258	624	634	1378	380	634	958	1088	942	314	404	1056	160	1024	343	450	203	520	1401	920	1010	1260	336	754	306	224	356	1236	268	618	216	658	398	408	1304	538	552
ID004168_D0	dada2	245	269	511	509	648	193	890	580	54	259	194	156	376	570	758	113	351	514	632	437	152	214	783	88	486	309	225	124	300	823	588	499	811	188	294	100	122	125	763	415	277	154	321	272	230	920	353	452
ID004168_D0	SNP	550	554	1080	1042	1364	400	1860	608	122	542	392	328	788	1198	1562	252	744	1086	1316	916	308	452	1638	190	1018	643	472	252	622	1713	1245	1048	1690	384	624	214	262	264	1738	424	578	312	674	574	485	1932	726	956
ID004172_D0	dada2	173	256	250	238	414	183	226	368	67	220	208	96	235	0	648	146	292	488	496	472	127	192	615	84	576	134	131	80	258	451	444	491	586	147	380	150	116	142	548	236	256	110	304	182	184	569	296	172
ID004172_D0	SNP	384	530	524	490	866	387	464	388	140	462	436	196	484	596	1360	302	604	1022	1030	990	268	388	1259	176	1193	281	278	164	532	948	925	1006	1210	306	776	302	234	298	1144	250	538	228	630	380	374	1194	609	362
ID004185_D0	dada2	182	202	278	282	463	140	420	442	40	228	184	129	345	322	604	132	304	469	495	457	140	177	232	77	389	162	234	91	289	537	510	388	541	184	343	146	103	136	590	259	253	145	318	172	197	637	231	279
ID004185_D0	SNP	406	412	586	595	976	302	882	460	91	470	390	261	719	698	1246	284	624	984	1043	956	288	370	479	158	802	332	486	184	599	1119	1062	830	1128	384	704	298	214	279	1224	272	519	302	664	362	406	1342	478	584
ID004195_D0	dada2	256	267	421	514	771	214	573	500	83	265	278	180	371	564	837	221	376	632	662	569	192	220	397	120	702	314	253	95	324	667	592	476	780	259	402	194	133	246	753	355	324	148	453	270	247	885	363	381
ID004195_D0	SNP	561	558	864	1076	1596	454	1201	515	172	548	580	378	772	1218	1758	448	792	1322	1367	1177	412	456	826	252	1486	652	518	204	664	1362	1220	966	1621	532	846	396	276	502	1556	372	672	300	957	556	518	1860	750	792
ID004202_D0	dada2	173	210	299	351	388	140	736	534	45	207	162	91	287	0	762	172	258	531	457	372	157	201	241	74	415	299	232	99	189	705	475	241	607	177	301	77	111	122	652	314	226	167	350	219	202	0	216	352
ID004202_D0	SNP	390	442	630	746	820	286	1534	555	94	438	328	194	600	796	1585	358	544	1124	958	777	328	414	517	156	862	619	502	210	394	1479	1004	504	1258	364	614	158	238	254	1372	328	480	348	728	454	428	0	446	732
ID004203_D0	dada2	187	212	366	379	749	233	322	222	59	225	201	125	321	430	743	116	249	606	551	601	171	166	821	102	681	182	199	94	290	419	449	676	581	171	443	151	128	238	543	234	272	114	257	200	210	746	289	387
ID004203_D0	SNP	420	442	768	802	1600	470	682	232	128	476	424	256	658	904	1543	248	530	1282	1138	1264	362	350	1758	214	1434	382	416	198	610	873	949	1414	1209	368	928	310	279	502	1138	242	576	242	540	422	434	1560	598	816
ID004207_D0	dada2	347	300	492	460	980	269	950	651	87	332	259	174	475	569	1023	215	421	865	810	695	211	259	399	119	620	455	295	126	384	960	732	620	815	274	521	184	141	172	909	466	374	214	473	328	315	1132	433	531
ID004207_D0	SNP	760	616	1032	966	2068	578	1996	681	182	680	535	364	986	1254	2119	446	866	1802	1702	1452	442	528	824	251	1288	948	616	267	805	1986	1520	1292	1694	568	1094	382	296	358	2059	490	774	440	994	684	641	2412	888	1108
ID004208_D0	dada2	218	361	340	312	553	213	371	589	108	367	307	146	462	393	646	224	397	576	702	673	191	312	978	112	780	163	184	129	432	724	660	736	959	198	568	180	166	146	740	340	441	195	352	281	219	688	438	267
ID004208_D0	SNP	468	752	723	662	1158	462	766	609	230	766	640	304	952	842	1331	464	808	1218	1472	1414	398	652	2042	230	1616	346	394	285	898	1515	1376	1554	1992	404	1175	364	353	296	1681	353	940	404	738	590	460	1436	898	554
ID004214_D0	dada2	222	273	505	370	642	215	599	503	94	266	235	135	429	453	802	126	391	641	692	606	185	222	976	95	635	189	201	129	348	750	537	695	731	252	477	133	135	172	671	390	367	154	346	237	252	832	341	320
ID004214_D0	SNP	470	562	1046	766	1348	451	1252	531	204	546	486	289	886	978	1654	260	826	1348	1460	1290	380	462	2015	200	1312	398	420	269	718	1552	1120	1470	1522	516	991	274	296	346	1533	406	772	320	720	492	528	1739	703	668
ID004215_D0	dada2	221	230	403	512	800	200	675	616	70	226	193	130	370	465	591	196	343	707	555	366	143	190	572	102	590	238	195	96	296	749	557	499	677	108	340	179	104	287	718	418	249	157	306	237	189	448	324	379
ID004215_D0	SNP	502	477	836	1082	1688	438	1412	650	146	470	404	268	779	973	1233	410	696	1472	1153	769	294	416	1190	228	1226	495	418	198	614	1568	1172	1042	1424	228	702	374	219	606	1627	428	524	332	644	488	398	940	680	802
M004	dada2	288	423	615	438	464	166	934	669	73	382	233	230	563	583	1173	153	486	803	907	789	181	346	1037	99	542	246	297	153	503	1145	749	592	1007	300	577	272	165	203	954	551	483	237	500	315	357	563	479	681
M004	SNP	604	852	1256	890	935	338	1880	672	146	770	468	470	1133	1180	2362	314	980	1632	1826	1595	366	699	2083	199	1090	497	596	308	1010	2310	1522	1199	2019	606	1158	544	342	416	2219	551	970	474	1042	635	716	1144	964	1380
M017	dada2	285	537	570	399	910	324	920	980	129	483	387	228	759	477	1406	171	0	972	1103	1116	220	447	1840	151	1959	211	216	179	508	1469	923	1585	1403	227	723	313	212	406	1438	600	573	237	487	423	313	866	608	391
M017	SNP	592	1078	1158	806	1838	653	1851	991	262	972	786	457	1520	972	2826	344	2	1962	2221	2266	442	897	3706	311	3932	425	433	358	1032	2948	1862	3202	2813	454	1446	630	452	820	2884	603	1154	478	976	852	626	1754	1220	788
M018	dada2	250	378	444	313	823	294	765	740	84	369	294	182	563	409	1036	107	411	753	772	768	169	305	1262	121	1023	178	222	173	391	1031	663	1017	944	225	628	258	155	198	835	417	443	184	374	325	249	787	382	416
M018	SNP	531	757	908	650	1677	591	1546	750	168	750	594	366	1130	839	2092	216	830	1546	1560	1585	340	612	2539	248	2057	360	446	348	790	2084	1364	2090	1900	458	1260	522	330	402	1994	419	896	370	761	658	498	1604	770	848
M019	dada2	255	437	492	428	1022	313	873	733	85	373	289	183	552	476	1125	144	473	812	893	913	162	367	1290	110	972	174	229	158	422	1155	713	1063	937	227	536	260	157	157	837	449	478	182	425	295	220	948	447	525
M019	SNP	550	876	1018	867	2082	628	1756	738	172	750	588	368	1110	974	2287	288	954	1662	1799	1841	334	736	2593	226	1950	350	468	316	854	2325	1472	2162	1883	462	1078	522	331	322	2003	449	974	366	858	598	442	1918	897	1062
M020	dada2	247	354	470	412	978	288	794	672	85	313	286	163	479	474	969	147	429	770	807	803	173	304	1127	119	947	212	223	124	378	1016	657	985	799	219	492	263	135	154	822	461	370	168	386	334	278	817	371	464
M020	SNP	512	713	975	828	1984	582	1602	675	170	626	582	332	962	964	1952	294	866	1570	1627	1627	348	608	2277	254	1909	429	446	248	775	2045	1343	2002	1602	440	986	530	290	312	1939	463	747	336	789	673	556	1670	747	944
Pv_Sc_14	dada2	182	648	409	235	396	207	547	831	95	431	273	164	728	401	1315	120	527	600	868	1238	180	381	1761	73	1908	111	154	132	502	572	745	1481	1381	176	744	279	203	388	1017	462	553	166	382	441	183	454	618	300
Pv_Sc_14	SNP	384	1298	829	476	801	416	1102	838	190	864	550	328	1458	818	2641	240	1054	1208	1742	2497	360	768	3534	150	3822	222	308	264	1012	1144	1498	2984	2764	356	1489	564	422	782	2602	462	1120	332	770	888	370	920	1238	602
Pv_Sc_15	dada2	312	495	585	418	741	310	774	758	125	403	351	179	465	531	1319	222	0	851	938	1070	228	397	1517	109	1500	190	236	156	491	1071	823	1507	1101	220	722	333	234	249	1024	349	521	181	504	432	271	0	539	511
Pv_Sc_15	SNP	650	992	1188	848	1506	622	1554	764	250	812	704	360	931	1090	2650	448	2	1708	1896	2162	456	801	3055	225	3012	384	473	312	984	2156	1662	3030	2206	442	1448	668	473	504	2346	349	1052	362	1020	874	544	0	1080	1022
Pv_Sc_16	dada2	119	333	223	115	234	151	343	485	81	293	187	75	382	227	805	51	303	320	0	761	84	311	1064	42	941	82	95	86	325	331	435	794	706	122	483	129	103	172	713	0	319	149	224	237	117	248	304	186
Pv_Sc_16	SNP	244	670	457	232	472	306	694	492	162	588	378	154	772	464	1612	104	613	642	2	1551	168	626	2151	87	1888	166	194	172	664	670	888	1634	1418	248	974	264	216	352	1431	1	650	300	464	478	234	506	613	376
Pv_Sc_17	dada2	199	522	544	302	600	266	552	643	107	372	311	133	665	562	1241	109	0	716	888	1147	170	303	1492	104	1698	184	151	130	477	522	672	1639	1137	186	720	278	194	363	893	295	543	165	369	479	245	676	573	313
Pv_Sc_17	SNP	404	1048	1106	607	1221	534	1108	646	214	746	630	272	1340	1141	2493	220	2	1448	1787	2333	342	612	3001	214	3418	370	304	260	958	1044	1364	3306	2280	372	1443	562	394	732	2133	296	1092	330	744	972	494	1364	1150	638
Pv_Sc_18	dada2	82	818	137	77	136	130	439	664	300	706	163	171	678	151	982	298	61	288	886	1051	144	760	1645	95	488	44	201	431	836	762	740	979	1332	221	903	280	219	92	1083	355	875	398	489	347	345	187	702	223
Pv_Sc_18	SNP	166	1642	276	156	274	260	880	665	604	1426	326	343	1360	306	1984	638	122	584	1780	2124	288	1529	3297	206	1090	88	406	863	1684	1532	1484	1967	2678	444	1808	560	529	186	2172	358	1758	800	982	696	694	377	1408	446
VN001_002	dada2	440	549	460	449	650	315	1136	865	134	406	262	343	736	0	1210	370	559	765	1036	880	227	502	1160	212	527	291	409	266	709	1401	1033	1149	1195	506	575	310	266	106	1023	629	588	297	822	418	419	0	535	691
VN001_002	SNP	934	1103	951	911	1330	642	2294	885	273	822	532	696	1486	1280	2481	742	1131	1558	2102	1795	456	1007	2350	429	1058	588	826	543	1434	2831	2104	2362	2412	1016	1155	624	556	212	2389	632	1190	606	1690	854	844	0	1074	1390
VN001_006	dada2	400	529	386	349	292	65	1705	717	148	339	288	331	623	0	895	333	474	749	433	669	178	553	300	118	333	250	496	220	687	1001	978	469	1131	551	469	361	273	99	1089	576	552	312	715	421	438	51	478	775
VN001_006	SNP	830	1077	790	706	588	130	3450	724	296	680	578	667	1282	726	1844	672	952	1514	933	1363	356	1112	600	248	670	504	1024	440	1384	2115	1976	944	2266	1102	942	724	552	198	2267	579	1114	626	1490	851	896	102	960	1560
VN001_007	dada2	373	587	610	424	599	208	1325	752	150	442	248	312	560	484	1221	311	531	766	955	805	245	501	1093	173	454	280	494	278	586	1467	922	900	1134	468	510	285	298	104	1153	557	499	312	721	377	448	0	487	708
VN001_007	SNP	780	1176	1246	860	1217	416	2664	762	304	884	505	628	1122	1030	2462	628	1070	1544	1931	1636	490	1009	2201	358	916	563	1002	556	1184	2961	1850	1818	2278	946	1024	574	612	214	2325	561	998	630	1458	761	901	0	976	1432
VN001_008	dada2	415	573	564	362	520	281	1149	899	188	508	261	345	589	0	1223	344	555	849	1041	886	247	623	1341	186	530	249	505	306	736	1609	1049	978	1279	473	528	304	255	110	1330	615	572	359	795	423	484	0	552	711
VN001_008	SNP	868	1150	1152	741	1050	570	2316	910	377	1023	526	693	1182	982	2454	694	1112	1718	2090	1801	494	1250	2694	380	1062	501	1014	612	1485	3236	2122	1982	2570	949	1055	610	520	220	2676	618	1154	730	1606	854	968	0	1108	1440
VN001_013	dada2	328	390	380	307	249	93	1577	677	104	311	212	252	493	313	612	162	389	664	747	584	151	352	574	136	293	193	394	6	471	1062	784	582	844	377	452	160	207	86	814	380	413	228	536	295	335	0	404	542
VN001_013	SNP	682	780	775	615	502	186	3172	685	208	624	425	506	994	670	1228	328	781	1338	1508	1179	302	711	1152	275	588	399	792	12	955	2132	1584	1168	1700	760	906	322	418	176	1890	381	830	458	1082	594	670	0	812	1096
VN001_019	dada2	269	404	344	214	357	184	880	695	97	351	170	196	534	0	907	232	390	498	697	752	175	373	1072	104	402	114	267	202	461	1029	637	650	832	276	545	156	188	86	866	39	482	233	294	263	257	0	423	367
VN001_019	SNP	558	808	699	436	722	370	1765	698	196	708	341	394	1072	706	1820	466	786	1012	1399	1525	350	746	2162	210	808	235	538	406	934	2065	1287	1314	1666	560	1090	312	378	174	1740	39	968	466	599	530	516	0	850	736
VN001_031	dada2	185	794	120	81	65	125	1105	670	372	799	157	304	907	0	876	483	689	220	888	1001	178	730	796	117	400	48	313	423	986	1387	815	906	1422	316	900	248	283	91	1067	515	937	500	528	363	415	261	742	373
VN001_031	SNP	385	1590	240	172	130	252	2218	683	744	1606	319	614	1822	364	1764	980	1387	452	1793	2029	360	1465	1604	237	806	96	630	850	1999	2786	1660	1836	2860	634	1806	506	578	182	2506	517	1896	1016	1070	731	836	530	1490	760
VN001_032	dada2	175	467	382	368	505	214	1606	824	72	319	220	206	590	504	1076	262	427	787	885	660	203	423	1002	115	395	311	427	241	574	1352	844	482	1010	381	388	237	236	66	967	489	457	401	648	533	378	231	390	710
VN001_032	SNP	370	934	778	742	1025	436	3232	827	206	638	442	558	1182	1068	2166	632	858	1582	1787	1348	406	868	2011	234	794	630	872	484	1160	2736	1798	978	2027	770	780	476	480	186	2307	514	920	806	1302	1082	758	484	860	1438
VN001_040	dada2	390	613	458	378	598	300	972	918	179	522	244	225	590	0	1272	289	568	681	1016	834	244	471	1693	207	797	198	305	201	608	1396	981	1103	1130	276	672	175	255	96	1049	583	549	233	601	382	346	0	576	491
VN001_040	SNP	820	1227	921	763	1216	604	1952	921	362	1054	488	451	1185	1118	2552	584	1138	1365	2034	1972	492	944	3399	414	1600	399	613	402	1226	2802	1974	2214	2266	554	1348	352	529	196	2449	582	1106	466	1209	766	692	0	1154	988
VN001_042	dada2	243	410	313	134	419	59	2985	760	79	223	175	161	427	271	783	235	346	503	497	287	99	355	351	52	219	225	371	168	421	1390	846	154	943	364	255	245	206	118	941	537	328	197	574	352	323	543	268	557
VN001_042	SNP	525	824	634	268	848	118	6004	765	158	450	354	322	858	552	1576	478	692	1018	996	600	198	710	713	139	440	452	744	336	852	2794	1698	314	1892	730	510	492	428	236	2181	539	660	396	1171	711	648	1104	536	1116
VN001_044	dada2	58	452	262	245	363	224	1187	807	154	507	230	168	611	442	1101	239	464	484	826	767	165	401	1554	88	774	112	221	175	583	1209	795	889	1079	229	641	233	209	101	1012	512	532	203	475	339	265	0	506	415
VN001_044	SNP	122	910	534	496	734	452	2378	818	310	1022	464	340	1222	920	2220	480	936	974	1675	1766	334	806	3124	208	1558	227	449	352	1178	2449	1608	1786	2174	462	1282	470	424	202	2364	514	1076	496	970	686	536	0	1016	842
VN001_049	dada2	326	527	468	322	607	257	981	832	160	12	290	208	564	0	1103	246	544	574	935	899	195	453	1536	167	692	194	335	194	538	1230	859	957	1151	271	622	197	185	112	933	469	524	249	562	342	292	945	508	517
VN001_049	SNP	676	1059	957	654	1226	517	1974	838	324	24	584	421	1130	1012	2228	498	1094	1154	1875	1825	392	906	3086	342	1388	391	676	390	1080	2475	1730	1931	2306	546	1246	398	388	226	2218	472	1055	503	1132	690	588	1926	1022	1040
VN001_060	dada2	429	589	492	382	547	236	1181	978	166	483	229	268	668	585	1182	265	587	750	1064	870	221	523	1279	93	601	237	360	272	624	1351	1038	1028	1222	417	664	234	250	89	1139	580	567	289	700	408	418	865	615	632
VN001_060	SNP	891	1178	1000	766	1104	534	2402	984	332	1064	462	614	1338	1242	2398	664	1180	1596	2138	1915	478	1050	2582	284	1210	544	736	548	1271	2765	2104	2073	2575	886	1332	472	513	232	2451	581	1138	682	1412	820	840	1746	1232	1356
VN001_063	dada2	310	667	330	238	300	64	2636	876	167	423	259	344	647	251	1231	405	413	345	551	410	155	610	442	109	247	153	575	317	729	1573	1159	467	1345	392	427	300	308	71	1086	651	639	308	881	422	419	0	412	688
VN001_063	SNP	644	1337	674	484	602	128	5313	879	336	854	520	694	1305	538	2476	814	836	694	1107	844	310	1220	889	218	494	308	1158	634	1466	3160	2342	944	2696	788	856	600	626	144	2629	655	1288	626	1778	853	844	0	825	1385
VN001_075	dada2	390	552	564	340	276	105	1443	843	125	73	291	302	582	0	1138	318	491	714	822	703	217	512	495	129	393	296	436	235	551	1385	918	728	1092	410	550	238	199	101	1033	584	477	312	783	388	428	413	422	709
VN001_075	SNP	806	1105	1147	684	554	214	2910	852	250	148	591	611	1170	1082	2282	642	987	1448	1650	1441	438	1025	994	260	790	594	876	471	1106	2775	1856	1474	2196	820	1106	478	418	204	2438	587	954	629	1576	782	858	835	847	1432
VN001_077	dada2	313	581	580	378	625	141	2867	957	148	462	272	281	686	608	1033	407	498	924	941	639	239	696	1085	145	377	270	476	278	692	1602	1157	417	1273	494	447	271	313	130	1071	681	527	565	820	435	504	53	449	775
VN001_077	SNP	651	1166	1174	766	1258	284	5760	958	300	930	549	568	1372	1265	2073	820	999	1860	1886	1512	478	1396	2182	292	758	544	958	556	1392	3214	2334	842	2548	990	896	545	644	260	2805	682	1056	1134	1656	875	1012	107	898	1558
VN001_078	dada2	228	517	384	233	257	191	1749	871	170	502	266	167	749	0	1104	212	490	347	892	1045	253	393	1521	121	1048	103	202	196	563	1361	754	973	1284	195	767	242	206	146	1052	579	649	264	451	332	272	0	565	259
VN001_078	SNP	470	1035	788	470	523	387	3518	881	344	1016	534	335	1504	596	2220	428	984	706	1801	2128	506	790	3065	248	2110	208	404	393	1145	2740	1528	1958	2579	390	1539	490	420	294	2433	577	1318	528	916	664	544	0	1134	522
VN001_079	dada2	188	686	296	211	216	219	559	1043	233	641	326	189	817	281	1462	225	572	420	1110	1254	215	518	2064	119	1673	110	198	231	700	980	932	1151	1662	187	933	180	234	550	1230	701	853	338	413	451	371	0	747	242
VN001_079	SNP	388	1374	600	424	438	440	1118	1057	466	1284	654	380	1644	596	2929	450	1146	842	2227	2548	432	1036	4148	238	3352	221	398	464	1412	1964	1876	2334	3335	376	1869	364	483	1104	3287	705	1716	682	832	909	746	0	1498	486
VN001_081	dada2	366	504	453	272	281	234	2682	767	112	378	180	275	577	477	1115	270	392	550	811	836	184	418	366	143	371	210	350	199	534	1194	777	973	1019	353	536	218	236	94	986	528	491	301	620	302	358	0	460	551
VN001_081	SNP	762	1011	925	544	574	472	5384	772	228	760	365	555	1158	990	2238	546	792	1106	1636	1696	368	843	736	290	746	430	703	406	1078	2399	1566	1960	2044	710	1074	438	478	192	2306	527	982	606	1246	608	718	0	922	1112
VN001_082	dada2	352	643	446	307	322	37	2145	772	156	310	234	320	647	269	943	339	404	576	702	408	141	513	477	76	220	231	528	247	582	1570	877	666	1182	425	437	252	229	98	1187	407	543	266	779	754	426	85	384	854
VN001_082	SNP	744	1286	918	618	648	104	4318	779	316	622	472	649	1300	756	2056	688	809	1158	1408	971	290	1032	956	188	536	476	1058	524	1172	3185	1931	1348	2369	858	876	554	542	198	2392	409	1167	544	1588	1530	860	174	812	1802
VN001_083	dada2	418	760	585	99	361	45	1990	981	161	533	279	428	666	305	1269	466	462	539	735	435	139	696	496	0	231	204	616	398	500	1826	1297	361	1563	618	470	221	357	54	1433	794	730	213	1068	495	570	204	406	1105
VN001_083	SNP	875	1528	1196	198	730	106	4014	994	326	1070	562	861	1337	616	2556	944	931	1104	1504	878	278	1403	994	4	466	481	1236	802	1018	3723	2635	729	3132	1240	944	442	722	134	2885	798	1476	562	2158	1001	1142	412	823	2226
VN001_084	dada2	435	542	476	431	584	269	2897	1026	132	454	290	321	638	0	1252	384	543	864	907	764	222	470	1035	169	523	325	503	245	619	1561	1180	857	1246	380	530	309	249	134	1206	602	565	322	672	443	462	0	558	761
VN001_084	SNP	905	1086	981	873	1192	538	5833	1033	270	910	588	650	1282	1376	2518	778	1087	1732	1832	1555	444	942	2079	344	1054	658	1010	494	1252	3136	2377	1728	2496	768	1061	624	512	272	2787	606	1132	652	1352	886	928	2	1122	1544
VN001_086	dada2	385	534	498	213	476	135	1381	865	126	421	235	263	564	427	1031	323	494	692	880	700	124	403	511	13	464	229	501	215	562	1357	870	563	1260	406	489	255	250	100	1088	574	402	331	700	386	368	103	461	929
VN001_086	SNP	804	1068	1038	430	1008	287	2780	873	252	848	470	528	1134	916	2078	652	1040	1396	1776	1507	278	812	1026	26	934	535	1010	456	1186	2725	1888	1144	2528	822	984	522	518	244	2486	580	1050	666	1416	782	809	208	1000	1880
VN001_087	dada2	0	627	486	300	368	114	1602	967	111	282	230	286	621	529	1217	322	498	699	925	674	160	497	859	59	430	221	436	248	562	1490	980	400	1160	407	377	154	254	90	1163	599	528	318	726	373	421	0	466	783
VN001_087	SNP	0	1265	1052	636	749	228	3272	1001	222	574	462	601	1280	1096	2489	654	1012	1454	1889	1438	326	1002	1747	122	868	449	905	502	1152	3024	2016	832	2353	823	758	309	530	196	2368	604	1082	638	1528	770	860	0	944	1602
VN001_088	dada2	349	421	336	504	533	113	994	715	153	205	346	229	454	454	968	270	473	755	656	528	236	339	669	75	600	212	413	136	535	1158	784	278	917	367	500	342	112	186	988	414	439	289	518	282	387	17	383	657
VN001_088	SNP	752	856	690	1020	1086	252	2072	718	310	676	696	460	910	930	1945	634	950	1530	1316	1114	484	828	1345	226	1206	515	832	458	1101	2340	1570	558	1838	736	1001	766	312	374	1981	436	884	584	1046	670	774	34	802	1322
VN001_089	dada2	219	478	247	113	145	145	620	630	191	384	134	183	586	0	711	218	420	280	689	747	119	440	1167	90	331	58	237	249	557	1041	630	689	982	213	462	106	166	69	838	396	543	258	418	254	286	384	462	256
VN001_089	SNP	464	958	530	234	308	294	1248	645	382	778	271	370	1181	526	1440	438	844	572	1405	1548	242	882	2374	180	666	120	478	501	1144	2111	1296	1416	1982	428	928	212	356	138	1695	403	1093	526	893	521	578	802	938	522
VN001_090	dada2	365	516	341	303	447	246	2285	844	170	449	212	224	650	0	1244	267	529	590	924	798	191	378	1506	14	508	140	356	219	621	1188	845	1009	1123	319	662	242	248	68	1038	518	528	442	528	308	300	0	503	477
VN001_090	SNP	770	1036	699	610	910	494	4602	851	342	910	430	454	1308	852	2540	546	1071	1190	1862	1839	384	759	3021	28	1020	280	714	438	1249	2402	1710	2032	2251	642	1326	484	518	140	2405	519	1068	896	1078	622	600	0	1010	980
VN001_092	dada2	252	430	242	189	263	156	1468	723	153	460	144	188	576	0	846	213	466	380	685	911	177	438	1431	120	482	114	247	174	554	1003	708	972	1010	197	666	90	234	103	879	342	483	278	456	466	296	0	473	379
VN001_092	SNP	514	860	498	382	528	312	2944	727	306	927	290	380	1156	724	1710	426	940	762	1375	1848	354	879	2874	244	967	230	498	348	1114	2012	1433	1958	2028	396	1332	180	470	206	1981	344	972	558	918	936	593	0	948	764
VN001_094	dada2	234	503	337	251	200	227	1795	691	190	500	218	199	603	294	1089	155	453	487	856	926	197	450	1518	59	693	46	260	194	536	1209	818	921	1116	224	653	123	230	56	925	502	531	229	481	445	284	216	466	329
VN001_094	SNP	484	1010	690	504	453	462	3622	694	380	1008	438	400	1214	610	2198	312	906	976	1723	1887	396	901	3042	182	1400	185	523	390	1086	2431	1646	1856	2237	456	1312	246	470	204	2214	503	1070	462	968	898	568	436	944	664
VN001_097	dada2	287	518	286	283	364	253	945	699	169	441	206	212	555	0	1194	156	470	479	917	939	176	440	510	114	555	159	286	170	541	1326	746	973	1110	251	598	198	200	96	1008	510	561	252	501	270	309	76	495	505
VN001_097	SNP	602	1038	595	574	742	512	1903	714	340	886	418	426	1122	870	2408	318	950	962	1844	1927	352	886	1025	228	1114	330	576	344	1093	2666	1510	1974	2237	504	1199	398	412	196	2368	514	1126	508	1026	550	622	158	992	1024
VN001_100	dada2	207	742	320	179	223	164	1599	708	234	646	216	191	834	0	1289	229	612	321	957	1378	188	579	1953	113	965	99	188	247	759	1537	852	1101	1585	224	891	155	263	116	1391	20	797	328	509	402	300	0	674	245
VN001_100	SNP	422	1492	659	366	452	334	3210	712	468	1294	434	385	1674	650	2594	466	1232	648	1920	2788	378	1160	3927	232	1942	201	376	494	1535	3091	1708	2210	3178	451	1785	310	535	234	2796	20	1600	666	1030	807	600	0	1350	494
VN001_102	dada2	379	611	324	274	380	262	878	1020	218	583	289	247	725	0	1201	297	615	486	1038	1147	202	475	1834	211	746	127	336	0	654	1471	866	1144	1263	289	750	162	249	131	1186	662	682	308	590	421	311	0	638	447
VN001_102	SNP	782	1229	652	550	770	524	1764	1025	436	1166	580	500	1458	878	2416	602	1233	974	2097	2328	414	952	3678	424	1496	259	672	4	1316	2955	1753	2294	2530	582	1506	328	531	264	2715	665	1374	616	1190	850	624	0	1276	906
VN001_104	dada2	13	599	411	320	559	62	1371	927	135	347	293	300	646	0	966	222	443	677	798	431	220	513	443	72	315	263	488	265	638	1534	1078	707	1327	511	451	228	250	93	1278	601	538	313	763	436	456	561	408	754
VN001_104	SNP	28	1202	872	656	1158	124	2778	942	272	702	594	617	1304	776	1978	460	900	1404	1623	917	442	1033	904	148	642	541	984	534	1317	3121	2197	1448	2678	1044	904	466	558	188	2588	606	1109	632	1576	892	926	1164	824	1550
VN001_105	dada2	321	599	430	324	524	80	1797	1003	113	377	286	349	618	530	1226	273	507	721	1008	796	205	610	442	116	382	269	488	314	750	1659	1086	523	1381	558	361	232	284	143	1193	684	589	346	820	410	482	0	431	851
VN001_105	SNP	674	1202	880	652	1060	160	3624	1007	226	758	574	700	1238	1100	2458	556	1016	1450	2029	1612	412	1220	894	233	764	540	980	628	1514	3334	2193	1056	2774	1126	724	466	572	286	2824	684	1181	695	1646	825	968	0	868	1714
VN001_108	dada2	407	702	478	138	374	107	1384	952	155	444	298	387	700	0	1379	431	538	911	679	711	147	560	430	152	341	290	625	311	688	1281	1191	129	1392	596	541	431	273	85	987	668	630	371	919	473	557	0	407	915
VN001_108	SNP	862	1417	1003	282	760	214	2786	965	312	902	607	784	1408	802	2805	868	1081	1856	1380	1466	296	1124	866	312	683	590	1258	624	1394	2583	2434	264	2798	1202	1084	866	578	170	3025	672	1272	750	1874	957	1115	0	820	1868
VN001_109	dada2	464	742	507	415	476	195	2363	1173	143	276	342	338	644	0	989	423	552	688	979	638	200	635	565	9	326	394	668	305	625	1939	1403	672	1561	630	421	337	315	109	1135	301	697	403	916	563	567	0	548	1079
VN001_109	SNP	980	1486	1062	844	992	394	4753	1180	286	552	693	684	1298	1316	1988	860	1108	1408	1993	1305	406	1273	1152	18	658	803	1342	612	1266	3949	2861	1360	3132	1268	846	680	668	226	3381	304	1406	818	1861	1136	1139	0	1097	2210
VN001_124_D0H0	dada2	473	931	476	261	0	30	1664	823	286	147	328	252	897	301	1351	417	616	315	567	381	267	904	497	54	288	273	861	575	809	2071	1627	154	1852	746	598	482	413	91	1484	983	942	366	1259	638	705	470	485	1027
VN001_124_D0H0	SNP	970	1870	969	524	78	80	3341	826	576	390	658	506	1798	620	2712	838	1238	638	1148	777	536	1814	998	109	581	550	1725	1152	1637	4192	3276	310	3726	1501	1201	976	851	212	3311	984	1898	920	2534	1276	1414	942	973	2076
VN001_125_D0H0	dada2	315	888	269	225	65	36	3030	695	250	253	339	212	822	0	880	381	562	311	526	369	258	979	1255	105	258	191	708	508	117	1516	1415	148	1700	664	55	254	399	97	1040	718	879	372	923	594	640	79	347	889
VN001_125_D0H0	SNP	652	1778	546	459	130	72	6093	698	500	506	685	426	1646	560	1768	762	1126	626	1060	746	520	1962	2519	220	518	386	1421	1023	234	3047	2858	298	3405	1330	110	510	804	194	2981	721	1779	748	1852	1196	1284	160	696	1784
VN001_127_D0H0	dada2	537	1183	295	235	85	66	1796	658	376	323	343	113	997	0	1273	535	773	259	639	399	232	1122	596	107	298	233	1057	722	1016	2386	1789	152	2293	862	556	527	420	106	1435	924	1078	537	1063	671	848	0	549	1441
VN001_127_D0H0	SNP	1164	2444	652	496	180	142	3677	705	764	686	729	252	2079	778	2666	1100	1622	540	1360	891	490	2269	1262	228	616	476	2190	1489	2143	4973	3728	324	4643	1789	1126	1086	1074	262	3486	951	2228	1138	2374	1418	1784	0	1123	3052
VN001_139_D0H0	dada2	477	1231	437	198	47	29	1945	579	276	277	302	224	957	330	1888	585	676	305	662	431	245	1155	547	124	190	202	1061	635	1450	2433	1816	148	2155	805	420	567	397	63	1343	1014	1025	480	1436	630	715	116	478	941
VN001_139_D0H0	SNP	974	2471	895	402	94	58	3909	582	552	554	612	453	1923	688	3791	1188	1358	614	1331	879	494	2324	1101	254	382	407	2144	1272	2921	4878	3648	298	4316	1616	842	1148	816	126	3321	1015	2052	962	2902	1276	1435	238	958	1908
VN001_140_D0H0	dada2	459	962	208	240	103	34	3887	596	264	265	327	201	711	258	1604	427	545	182	275	335	209	858	429	136	254	219	817	558	685	2005	1384	67	1633	692	535	261	370	103	1369	809	855	446	1108	644	584	200	375	926
VN001_140_D0H0	SNP	940	1929	416	480	210	68	7804	599	532	534	655	402	1433	530	3228	858	1092	370	550	690	418	1722	864	274	512	440	1634	1118	1382	4022	2795	136	3286	1390	1075	524	780	208	2744	812	1722	892	2229	1298	1172	406	750	1870
VN001_144_D0H0	dada2	424	869	256	127	66	37	1678	590	235	186	205	237	540	0	986	374	513	195	443	322	195	812	535	31	226	219	732	446	388	1487	1270	75	1437	618	505	253	366	87	1281	653	726	358	1091	490	593	32	318	869
VN001_144_D0H0	SNP	870	1748	521	435	162	104	3362	598	474	378	511	482	1086	556	1978	856	1032	390	897	743	390	1632	1120	62	456	442	1466	902	784	3020	2565	150	2884	1248	1015	508	752	174	2586	658	1463	722	2240	990	1189	65	755	1760
VN001_146_D0H0	dada2	7	1069	235	90	95	27	1812	522	290	135	273	75	538	191	939	290	436	111	306	306	165	946	467	51	248	162	916	667	532	2131	1633	34	1770	592	366	153	451	79	1341	846	696	419	968	693	551	0	214	997
VN001_146_D0H0	SNP	14	2146	474	181	192	54	3650	530	582	272	548	150	1080	390	1890	586	878	226	612	625	332	1897	941	104	498	331	1836	1334	1074	4277	3314	70	3558	1194	740	306	920	159	2695	850	1398	850	1946	1397	1112	0	430	2006
VN001_150_D0H0	dada2	352	879	213	160	33	27	1382	574	248	113	233	215	493	143	787	227	355	115	431	299	188	781	272	32	172	200	719	531	462	1868	1270	87	1517	499	83	96	317	80	874	719	719	386	1128	580	491	0	268	789
VN001_150_D0H0	SNP	739	1760	444	326	66	56	2783	587	496	228	473	430	992	290	1588	472	714	235	872	639	382	1564	561	66	350	402	1442	1064	941	3786	2594	176	3059	1002	166	196	662	160	2460	721	1454	790	2336	1172	985	0	545	1598
VN001_154_D0H0	dada2	343	1076	363	171	91	70	1860	742	236	418	361	358	1079	422	1632	515	622	467	606	453	205	999	703	35	296	171	872	560	876	2230	1657	193	1762	748	639	263	438	179	1376	643	827	408	1269	619	627	76	476	1111
VN001_154_D0H0	SNP	714	2156	748	444	358	140	3732	775	472	976	755	824	2165	913	3498	1104	1249	940	1260	967	410	2065	1416	92	594	376	1756	1201	1811	4489	3350	389	3532	1506	1430	576	884	364	3091	661	1665	936	2722	1290	1426	176	954	2246
VN001_302	dada2	311	542	377	324	294	82	1988	830	121	302	236	185	599	0	1035	388	415	566	517	577	238	487	655	36	369	256	460	258	461	1331	953	182	1219	385	454	286	262	84	1051	507	461	299	659	403	428	14	328	711
VN001_302	SNP	660	1124	772	654	597	164	4012	844	242	604	476	370	1214	900	2152	780	830	1144	1080	1166	476	975	1316	72	744	514	942	516	932	2706	1930	368	2449	778	910	574	532	236	2248	522	930	614	1347	818	858	28	675	1446
VN001_303	dada2	376	598	525	367	488	218	1136	967	161	582	230	255	702	542	1224	328	590	738	1163	987	204	546	1032	187	590	185	362	257	683	1599	1052	1143	1322	392	642	169	277	114	1393	593	646	336	598	444	428	0	637	611
VN001_303	SNP	799	1199	1079	742	992	442	2278	971	322	1168	467	514	1410	1136	2460	666	1184	1482	2330	2007	410	1100	2074	379	1186	374	726	514	1372	3200	2126	2302	2660	788	1285	340	579	228	2792	594	1301	672	1198	891	860	0	1282	1230
VN001_304	dada2	335	534	341	245	381	257	1876	804	152	487	194	231	639	417	1075	280	545	527	922	896	180	457	1261	167	531	196	311	253	597	1323	800	955	1122	323	760	228	252	144	1089	458	518	307	574	372	327	0	526	499
VN001_304	SNP	700	1093	712	505	784	516	3794	808	310	1008	390	478	1280	900	2220	566	1094	1062	1886	1838	362	920	2530	338	1068	392	633	506	1201	2657	1645	1926	2252	646	1528	466	506	290	2193	468	1040	618	1152	762	656	0	1073	1012
VN001_305	dada2	0	650	546	283	448	293	1406	1004	184	693	239	306	744	0	1300	364	630	604	1182	1169	224	602	1886	0	612	163	361	302	838	1666	976	1022	1552	368	813	246	284	107	1198	623	758	366	557	367	405	183	675	509
VN001_305	SNP	0	1306	1138	574	922	593	2840	1026	372	1394	485	620	1499	1210	2614	738	1270	1226	2394	2379	450	1210	3814	2	1230	331	726	608	1710	3386	2002	2092	3112	746	1633	500	626	224	2806	628	1524	738	1158	754	811	372	1356	1036
VN001_308	dada2	444	547	620	426	411	257	2592	921	161	461	252	291	649	607	1246	349	551	797	940	824	232	611	1207	0	524	336	576	248	587	1462	979	848	1249	460	524	250	270	145	1078	584	581	580	753	372	459	0	584	702
VN001_308	SNP	940	1099	1251	863	838	514	5224	921	326	924	506	582	1300	1290	2500	702	1104	1606	1884	1665	466	1222	2421	6	1050	678	1153	496	1180	2926	1965	1696	2499	924	1050	502	542	292	2556	585	1172	1162	1515	746	923	0	1168	1426
VN001_310_D	dada2	427	524	491	612	727	323	3220	1079	154	408	309	231	631	730	1344	344	609	926	920	713	305	576	580	188	664	328	443	282	593	1607	959	903	1224	427	607	274	268	140	1302	606	514	287	730	487	480	43	607	808
VN001_310_D	SNP	896	1050	993	1246	1474	651	6572	1086	340	980	618	464	1267	1502	2776	696	1220	1860	1907	1481	628	1156	1216	385	1368	692	920	596	1200	3234	1998	1834	2457	860	1262	554	552	282	2611	607	1062	600	1522	980	960	88	1217	1680
VN001_312	dada2	381	484	459	411	306	51	2573	773	124	365	226	307	502	545	1114	329	430	641	800	710	200	468	313	73	424	207	410	230	501	1244	815	673	1018	434	538	214	215	114	946	452	479	495	616	354	368	0	441	672
VN001_312	SNP	805	975	937	826	620	102	5158	778	250	732	454	614	1004	1140	2234	660	866	1290	1604	1438	402	939	626	146	854	414	822	462	1008	2494	1642	1354	2041	870	1075	428	434	232	2207	452	962	996	1247	714	740	0	883	1354
VN001_316	dada2	405	610	525	351	208	161	3142	887	175	466	272	361	721	472	1326	421	524	736	825	675	218	579	364	50	384	284	566	318	461	1667	1193	473	1426	541	546	298	325	120	1196	635	654	339	805	502	486	70	413	1098
VN001_316	SNP	840	1224	1064	704	424	322	6308	898	352	936	548	724	1452	1008	2664	848	1054	1476	1661	1376	440	1164	731	100	774	573	1136	638	930	3352	2412	948	2862	1086	1094	600	667	242	2757	637	1316	686	1636	1018	977	140	829	2212
VN001_319	dada2	313	466	456	259	195	156	993	688	107	361	169	238	341	432	942	283	395	680	804	683	160	476	364	46	352	223	417	198	487	1254	860	540	978	389	453	187	232	91	886	140	414	270	508	385	339	63	425	429
VN001_319	SNP	649	934	932	520	396	312	2000	693	214	728	343	478	684	882	1890	570	794	1372	1617	1384	324	952	734	98	706	450	838	399	981	2510	1733	1088	1957	784	906	378	472	182	2075	141	832	542	1023	771	680	126	850	864
VN001_322	dada2	276	501	363	267	250	128	2179	726	98	68	210	239	578	0	1061	251	358	578	663	494	138	453	582	74	282	169	437	220	459	1235	945	401	1105	379	386	194	218	59	936	234	499	309	691	415	345	540	451	614
VN001_322	SNP	570	1002	748	538	504	256	4374	728	224	236	425	547	1167	926	2126	598	718	1162	1340	1139	320	910	1170	148	566	376	876	514	1086	2483	1900	890	2216	764	772	396	498	146	2134	235	1008	620	1394	838	765	1093	910	1240
VN001_324_D	dada2	448	445	525	688	1013	334	2881	1038	159	441	327	278	617	654	1255	313	563	1058	724	728	243	480	789	234	737	502	383	222	530	1136	872	755	1109	364	606	390	258	139	1176	561	469	281	594	440	420	421	545	848
VN001_324_D	SNP	937	918	1061	1420	2046	674	5794	1049	322	912	658	560	1264	1396	2612	630	1128	2128	1510	1487	486	966	1580	492	1536	1011	770	447	1072	2366	1768	1530	2235	737	1218	782	524	278	2357	564	940	570	1230	886	872	860	1096	1704
VN001_325	dada2	400	638	595	293	437	166	1354	1024	157	384	292	376	578	0	1377	459	553	791	893	682	219	669	546	183	401	267	584	293	642	1656	1173	255	1539	521	560	267	274	121	1008	660	619	352	881	461	499	0	507	873
VN001_325	SNP	846	1278	1212	598	886	334	2717	1027	314	774	588	752	1158	1314	2774	930	1108	1592	1795	1383	438	1340	1100	370	818	540	1175	588	1296	3335	2356	512	3080	1050	1120	538	570	244	2704	662	1246	710	1776	924	998	0	1020	1754
VN001_328	dada2	359	520	548	430	517	159	2032	1037	145	370	286	320	588	0	1168	360	474	672	920	703	204	492	260	15	444	401	447	261	593	1352	1016	759	1141	427	446	194	255	113	1013	403	510	350	749	538	444	273	548	838
VN001_328	SNP	770	1074	1120	933	1064	319	4126	1044	292	744	578	648	1183	1188	2449	728	950	1350	1858	1448	432	987	523	30	892	816	935	544	1196	2736	2070	1540	2294	908	970	436	522	226	2340	429	1046	704	1581	1086	890	558	1100	1686
VN001_331_D0H0	dada2	0	1239	421	285	24	59	1737	896	293	626	384	538	1189	628	1813	363	866	546	627	649	303	1252	370	190	372	262	1123	753	1069	2494	1716	354	2123	762	732	413	553	79	1764	385	1189	554	1362	714	796	0	645	1203
VN001_331_D0H0	SNP	0	2482	848	574	48	122	3484	901	594	1255	772	1077	2384	1326	3641	736	1739	1100	1261	1313	608	2512	756	386	748	527	2258	1516	2152	5006	3453	710	4256	1534	1464	829	1112	158	3540	386	2390	1116	2740	1434	1594	0	1293	2428
VN001_334_D0H0	dada2	432	897	649	252	66	41	1456	685	247	369	317	229	834	295	1263	506	556	381	529	388	258	920	244	86	261	202	785	476	443	1877	1365	231	1590	683	597	336	386	93	1288	514	848	406	1198	572	617	0	492	818
VN001_334_D0H0	SNP	894	1796	1321	506	138	82	2941	691	496	738	634	462	1680	656	2544	1016	1118	772	1064	784	516	1841	491	175	524	405	1578	954	898	3758	2734	464	3191	1376	1196	674	776	186	2588	516	1700	818	2410	1152	1240	0	984	1654
VN001_337_D0H0	dada2	543	983	451	292	496	70	1664	819	277	505	335	344	735	448	1373	431	616	407	653	547	246	916	1119	176	369	219	630	486	569	1411	1343	388	1546	587	558	317	408	122	1383	556	790	426	999	540	635	252	507	803
VN001_337_D0H0	SNP	1128	1979	914	584	1003	140	3339	825	556	1012	677	688	1470	956	2760	870	1240	826	1309	1279	494	1838	2246	356	744	442	1265	973	1154	2839	2702	783	3097	1186	1118	642	818	248	2776	558	1590	858	2007	1095	1276	508	1016	1616
VN001_338_D0H0	dada2	215	895	307	224	48	52	1583	651	290	402	262	406	782	291	1184	516	535	320	501	358	236	833	237	32	255	182	717	539	640	1619	1220	266	1433	578	559	322	355	41	1163	384	770	350	1007	521	550	782	340	741
VN001_338_D0H0	SNP	456	1798	648	460	124	108	3200	667	588	806	530	830	1570	652	2397	1044	1074	650	1027	736	474	1684	567	64	520	370	1444	1087	1305	3304	2481	536	2871	1168	1126	648	762	130	2706	388	1560	710	2114	1056	1107	1608	776	1494
VN001_342_D0H0	dada2	0	647	482	469	305	119	1119	918	217	309	399	278	678	552	871	445	539	708	622	577	313	546	452	72	510	298	544	348	556	1496	1013	316	1217	435	558	372	299	159	1121	253	645	434	835	435	554	1168	421	808
VN001_342_D0H0	SNP	0	1299	1009	960	614	242	2260	936	438	622	810	570	1366	1195	1750	904	1084	1438	1254	1192	628	1102	914	147	1029	602	1092	699	1120	3030	2067	634	2439	878	1117	754	614	324	2647	255	1304	878	1728	875	1118	2378	844	1630
VN001_356_D0_D	dada2	413	507	811	970	987	347	1503	903	157	469	436	248	587	774	1223	339	664	1169	965	824	437	431	1440	242	1303	530	479	239	529	1406	956	626	1061	448	689	368	202	441	1064	488	528	330	642	361	467	1315	504	797
VN001_356_D0_D	SNP	874	1025	1762	2191	2086	786	3031	912	318	1006	921	528	1182	1649	2488	712	1334	2356	2011	1679	878	904	2908	548	2621	1072	968	478	1070	2847	1928	1275	2254	962	1462	742	414	910	2201	499	1146	670	1317	814	984	2695	1106	1606
VN001_363_D0H0	dada2	26	747	450	215	290	122	1522	880	291	630	303	392	792	376	737	435	580	319	951	868	281	810	588	13	410	147	644	412	853	1642	1240	653	1624	570	690	200	360	94	1432	516	798	475	903	799	525	959	700	708
VN001_363_D0H0	SNP	54	1566	925	440	612	246	3072	892	586	1324	642	828	1592	1063	1576	972	1166	644	1963	2049	562	1620	1182	26	822	306	1294	964	1798	3307	2520	1316	3264	1198	1442	456	736	188	2996	536	1604	955	1836	1648	1132	2017	1511	1480
VN001_365_D0H0	dada2	0	679	465	228	324	112	1447	737	117	528	231	225	765	0	1028	397	581	339	947	840	212	661	502	59	424	135	530	379	834	1497	1073	748	1338	487	602	228	294	105	1400	424	719	358	772	621	467	926	553	524
VN001_365_D0H0	SNP	0	1372	957	464	669	300	2920	749	414	1066	472	554	1545	1103	2072	806	1174	694	1914	1952	424	1326	1015	122	862	274	1072	766	1683	3030	2208	1524	2688	976	1210	456	613	216	2812	428	1451	728	1586	1265	939	1895	1111	1070
VN001_366_D0_D	dada2	0	670	778	996	775	512	4399	1376	252	698	492	405	777	799	1642	496	751	1516	1416	980	585	625	1734	4	1265	656	778	359	835	1661	1450	1112	1696	599	1101	537	246	239	1305	229	554	444	1073	580	730	2025	838	1153
VN001_366_D0_D	SNP	0	1341	1577	2019	1569	1028	8860	1386	506	1406	992	817	1560	1618	3299	1002	1508	3048	2845	2007	1174	1253	3484	8	2557	1321	1566	718	1685	3352	2914	2242	3401	1202	2206	1076	496	484	3686	230	1124	894	2166	1176	1467	4117	1687	2324
VN001_368_D0H0	dada2	0	690	419	175	321	215	1163	713	161	608	200	276	716	0	1041	257	600	468	975	864	255	572	1146	26	483	136	393	230	726	1289	971	999	1222	374	727	169	273	102	1160	460	672	295	645	570	402	733	611	460
VN001_368_D0H0	SNP	0	1382	866	416	646	485	2340	720	396	1226	402	622	1438	1026	2094	640	1207	950	1957	2009	512	1144	2296	55	968	277	793	578	1478	2595	1974	2022	2452	756	1460	340	564	204	2338	476	1356	710	1303	1145	804	1482	1226	926
VN001_372_D0H0	dada2	495	980	576	306	275	237	1492	915	312	796	290	459	1114	313	1610	543	917	588	1463	1559	320	878	1107	189	603	181	644	549	1073	1465	1465	1162	1775	652	1019	288	471	137	1174	478	1010	559	1064	573	659	557	1000	831
VN001_372_D0H0	SNP	1013	1965	1182	620	552	476	3000	924	630	1598	583	928	2240	1302	3236	1088	1841	1194	2940	3199	642	1759	2222	390	1216	362	1296	1100	2155	2945	2968	2330	3564	1320	2045	578	960	274	3502	479	2030	1124	2201	1158	1326	1137	2020	1676
VN001_373_D0H0	dada2	336	606	456	247	296	206	783	751	213	624	225	289	801	0	1139	208	596	515	1066	1066	252	675	1436	0	574	163	399	292	747	1378	1017	1061	1337	348	859	174	284	127	1211	60	643	335	677	408	415	0	585	457
VN001_373_D0H0	SNP	698	1219	942	501	596	412	1578	760	426	1251	454	578	1610	1002	2290	420	1200	1042	2145	2150	510	1352	2896	0	1152	334	798	588	1513	2765	2054	2146	2680	696	1728	350	582	254	2429	60	1292	678	1402	824	836	0	1186	924
VN001_375_D0H0	dada2	331	588	450	243	294	213	866	732	222	589	201	285	682	426	1149	332	579	607	999	1030	212	506	1627	0	548	169	336	298	730	1280	862	793	1269	365	666	217	295	102	982	527	681	534	671	364	420	0	653	461
VN001_375_D0H0	SNP	687	1182	932	493	594	433	1744	735	448	1181	409	578	1374	914	2312	672	1162	1232	2033	2096	427	1022	3273	0	1103	342	674	598	1472	2576	1736	1618	2540	732	1336	442	606	208	2322	529	1372	1076	1376	733	844	0	1314	950
VN001_376_D0H0	dada2	147	746	444	249	164	238	1146	719	267	732	210	324	863	0	1202	359	687	512	1125	1010	229	693	1364	45	552	136	456	373	903	1624	1037	1229	1402	429	821	234	328	94	1237	403	741	407	721	572	478	463	737	514
VN001_376_D0H0	SNP	298	1499	902	500	444	478	2304	722	538	1470	422	650	1737	860	2466	720	1380	1028	2264	2262	460	1391	2744	90	1108	274	917	752	1816	3252	2092	2474	2806	868	1642	472	682	188	2479	405	1656	818	1463	1149	957	932	1489	1034
VN001_377_D0H0	dada2	308	610	256	142	109	38	822	525	217	553	167	302	686	0	1054	297	577	397	937	1051	157	563	1416	78	393	80	371	342	668	898	861	876	1287	366	633	182	255	72	916	474	694	317	643	269	376	0	632	398
VN001_377_D0H0	SNP	628	1221	518	289	222	77	1650	527	436	1108	335	616	1372	794	2114	596	1154	806	1885	2112	316	1126	2842	158	788	160	744	684	1343	1798	1737	1767	2580	741	1274	364	516	146	2114	476	1392	636	1294	543	754	0	1268	808
VN001_378_D0H0	dada2	248	479	333	268	78	133	1249	699	126	272	202	182	504	421	824	289	368	527	556	388	186	375	891	64	271	233	460	213	420	1145	861	207	962	326	421	199	193	87	974	181	386	200	601	399	444	1159	367	883
VN001_378_D0H0	SNP	522	958	680	536	158	267	2510	705	253	552	408	368	1016	884	1668	582	740	1078	1118	791	376	755	1804	128	544	481	924	429	847	2312	1752	414	1925	660	844	402	386	176	1958	181	778	400	1213	812	890	2352	737	1786
VN001_384_D0H0	dada2	0	506	292	152	97	141	550	556	158	455	139	214	565	0	812	143	485	337	732	726	209	399	1305	130	477	80	245	226	566	1069	589	838	894	230	589	154	210	89	845	18	503	244	400	300	271	0	498	314
VN001_384_D0H0	SNP	8	1028	594	305	196	282	1106	559	332	910	280	428	1130	627	1640	290	974	684	1477	1480	418	811	2619	264	960	160	500	455	1140	2166	1188	1698	1792	464	1182	308	430	180	1707	25	1010	498	806	608	546	8	998	636
VN001_387_D0H0	dada2	0	654	356	201	235	190	621	706	242	500	192	225	694	364	717	269	484	479	835	875	234	660	995	153	600	89	317	257	626	1208	786	892	1145	301	660	228	243	106	768	29	559	298	539	366	323	505	606	343
VN001_387_D0H0	SNP	0	1315	722	404	470	381	1250	711	484	1000	386	451	1393	756	1444	538	976	958	1681	1767	470	1320	2004	311	1204	178	634	514	1266	2426	1582	1788	2301	608	1326	458	487	216	2188	29	1122	598	1086	736	646	1014	1215	690
VN001_388_D0H0	dada2	0	979	329	227	55	26	1540	533	286	280	311	302	776	0	826	493	579	219	431	341	236	851	299	19	322	131	667	559	791	1985	1247	166	1499	619	499	330	424	90	899	413	889	454	1089	581	693	656	457	915
VN001_388_D0H0	SNP	0	1971	674	460	110	54	3100	536	574	560	633	612	1556	578	1654	988	1162	440	864	689	472	1705	600	38	650	267	1343	1120	1601	3988	2524	338	3010	1247	997	664	858	184	2625	414	1788	918	2198	1168	1390	1328	918	1850
VN001_389_D0H0	dada2	395	827	399	261	188	29	1209	622	231	345	268	163	603	274	1070	447	529	309	535	298	244	777	911	49	247	198	685	443	698	1912	1292	224	1525	613	475	248	279	113	1126	698	702	625	1049	499	674	6	427	785
VN001_389_D0H0	SNP	810	1670	808	522	380	58	2460	630	464	692	544	331	1224	574	2166	896	1060	624	1076	601	496	1560	1829	102	500	400	1392	890	1406	3881	2592	448	3053	1234	951	498	562	226	2602	704	1412	1252	2110	1006	1354	14	855	1580
VN001_391_D0H0	dada2	280	559	415	236	276	191	727	817	190	533	203	224	719	345	1006	254	503	413	909	925	202	475	1507	149	629	124	277	237	593	1155	804	787	1093	272	706	241	250	92	958	596	627	294	493	341	356	523	548	339
VN001_391_D0H0	SNP	574	1123	850	472	560	384	1460	826	380	1070	406	449	1448	728	2020	516	1010	836	1825	1879	410	952	3024	308	1267	248	556	474	1206	2318	1626	1592	2194	554	1412	486	502	188	2258	597	1264	592	990	692	714	1060	1096	682
VN001_392_D0H0	dada2	0	541	311	156	226	182	1648	738	212	515	185	199	653	0	1113	232	471	306	920	896	177	480	1223	131	547	74	261	218	642	1136	718	1021	1166	250	640	125	227	76	1073	452	634	267	419	311	295	476	561	306
VN001_392_D0H0	SNP	0	1085	654	320	468	382	3315	751	428	1048	376	402	1322	580	2277	478	956	644	1884	1854	358	971	2487	269	1116	158	524	444	1336	2301	1484	2112	2348	512	1290	252	506	166	2187	454	1287	550	905	633	596	970	1157	620
VN001_393_D0H0	dada2	172	482	166	80	89	105	392	431	145	381	124	172	457	0	889	170	346	231	540	669	137	361	1341	48	396	54	237	205	475	869	566	595	755	140	691	127	190	85	769	301	461	223	343	294	272	0	426	192
VN001_393_D0H0	SNP	362	964	332	162	186	210	788	434	290	766	251	347	920	478	1788	346	696	468	1088	1344	274	722	2700	98	802	108	476	410	960	1741	1144	1194	1517	280	1381	258	393	172	1548	302	922	448	692	588	548	0	853	386
VN001_394_D0H0	dada2	143	578	133	75	93	102	1024	583	270	581	126	203	683	0	863	266	518	174	796	939	168	597	1402	94	375	37	218	329	765	1045	696	749	1092	250	755	241	213	75	816	19	646	364	479	264	284	20	605	239
VN001_394_D0H0	SNP	298	1162	266	150	188	204	2064	587	542	1170	252	410	1370	362	1733	538	1038	350	1596	1894	340	1195	2814	192	751	74	436	662	1544	2102	1402	1512	2189	504	1512	482	438	152	1853	19	1296	732	964	534	572	40	1216	480
VN001_61_D	dada2	445	488	675	757	653	298	3837	1080	163	433	345	303	696	616	1355	368	573	1027	882	698	294	441	517	214	682	495	522	271	529	1438	1063	735	1177	378	668	418	272	131	1049	640	497	336	660	439	472	0	531	847
VN001_61_D	SNP	935	983	1382	1527	1330	598	7730	1085	326	868	702	606	1396	1309	2725	746	1154	2076	1770	1407	588	886	1036	432	1370	997	1055	547	1066	2896	2148	1480	2364	758	1340	842	546	264	2452	637	998	672	1328	888	948	4	1064	1710
[truncated: 50 more columns]
