# Supplementary material for: Microhaplotype deep sequencing assays to capture Plasmodium vivax infection lineages
Source: Research Square preprint supplement (doi:10.21203/rs.3.rs-5099658/v1), 2024-10-17
Supplement: Supplementary file [file 722db3a84b7b1b60441c71ce.pdf]

1 **Supplementary Information for:**

2

3 **Microhaplotype deep sequencing assays to capture *Plasmodium vivax* infection lineages**

4

5 Mariana Kleinecke<sup>1</sup>, Angela Rumaseb<sup>1</sup>, Edwin Sutanto<sup>2</sup>, Hidayat Trimarsanto<sup>1,20</sup>, Kian Soon Hoon<sup>1</sup>, Ashley  
6 Osborne<sup>1</sup>, Paulo Manrique<sup>3,4</sup>, Trent Peters<sup>5</sup>, David Hawkes<sup>5</sup>, Ernest Diez Benavente<sup>6</sup>, Georgia Whitton<sup>7</sup>,  
7 Sasha V Siegel<sup>7</sup>, Richard D Pearson<sup>7</sup>, Roberto Amato<sup>7</sup>, Anjana Rai<sup>1</sup>, Nguyen Thanh Thuy Nhien<sup>8</sup>, Nguyen  
8 Hoang Chau<sup>8</sup>, Ashenafi Assefa<sup>9</sup>, Tamiru S Degaga<sup>10</sup>, Dagimawie Tadesse Abate<sup>10</sup>, Awab Ghulam Rahim<sup>11</sup>,  
9 Ayodhia Pitaloka Pasaribu<sup>12</sup>, Inge Sutanto<sup>13</sup>, Mohammad Shafiu Alam<sup>14</sup>, Zuleima Pava<sup>1</sup>, Tatiana Lopera-  
10 Mesa<sup>15</sup>, Diego Echeverry<sup>16</sup>, Tim William<sup>1,17</sup>, Nicholas M Anstey<sup>1</sup>, Matthew J Grigg<sup>1</sup>, Nicholas Day<sup>18,19</sup>,  
11 Nicholas J. White<sup>18,19</sup>, Dominic P Kwiatkowski<sup>7</sup>, Rintis Noviyanti<sup>20</sup>, Daniel Neafsey<sup>3,4</sup>, Ric N Price<sup>1,18,19</sup>,  
12 Sarah Auburn<sup>1,18</sup>

13

- 14 1. Menzies School of Health Research and Charles Darwin University, Darwin, Australia
- 15 2. Exeins Health Initiative, South Jakarta, Indonesia
- 16 3. Harvard T.H. Chan School of Public Health, USA
- 17 4. Broad Institute, USA
- 18 5. Australian Genome Research Facility, Australia
- 19 6. Laboratory of Experimental Cardiology, Department of Cardiology, University Medical Center  
20 Utrecht, Utrecht, the Netherlands
- 21 7. Wellcome Sanger Institute, Hinxton, UK
- 22 8. Oxford University Clinical Research Unit, Hospital for Tropical Diseases, Ho Chi Minh City,  
23 Vietnam
- 24 9. Ethiopian Public Health Institute, Addis Ababa, Ethiopia
- 25 10. College of Medicine & Health Sciences, Arba Minch University, Arba Minch, Ethiopia
- 26 11. Nangarhar Medical Faculty, Nangarhar University, Ministry of Higher Education, Jalalabad,  
27 Afghanistan
- 28 12. Universitas Sumatera Utara, Medan, Indonesia
- 29 13. Faculty of Medicine, University of Indonesia, Jakarta, Indonesia
- 30 14. Infectious Diseases Division, International Centre for Diarrhoeal Disease Research, Bangladesh  
31 (icddr,b), Dhaka, Bangladesh
- 32 15. Universidad de Antioquia, Colombia

- 33 16. Departamento de Microbiología, Facultad de Salud, Universidad del Valle, Cali, Colombia
- 34 17. Queen Elizabeth Hospital, Malaysia
- 35 18. Centre for Tropical Medicine and Global Health, Nuffield Department of Medicine, University of
- 36 Oxford, Oxford, United Kingdom
- 37 19. Mahidol-Oxford Tropical Medicine Research Unit, Mahidol University, Bangkok, Thailand
- 38 20. Eijkman Molecular Biology Research Center, National Research and Innovation Agency,
- 39 Cibinong, Indonesia

40

41 **Contents**

42

43 Supplementary Figure 1. Genomic locations of the 97 nuclear genome markers. .... 3

44 Supplementary Figure 2. Overview flowchart of Plasmodium spp sample genotyping and analysis. .... 4

45 Supplementary Figure 3. Specificity of the assays..... 6

46 Supplementary Figure 4. Assay sensitivity using serial dilutions..... 7

47 Supplementary Figure 5. Pvmtcox1 qPCR Ct against parasite density. .... 7

48 Supplementary Table 1. Assay sensitivity in the *P. vivax* serial dilutions. .... 8

49 Supplementary Table 2. Concordance in SNP-based genotype calling between amplicon sequencing and

50 whole genome sequencing (WGS) data at 10% threshold ..... 9

51 Supplementary Table 3. Concordance in SNP-based genotype calling between amplicon sequencing and

52 whole genome sequencing (WGS) data at 1% threshold ..... 9

53 Supplementary Figure 6. Marker diversity by country. .... 10

54 Supplementary Table 4. Plasmodium spp. classification. .... 11

55 Supplementary Table 5. Prevalence of orthologous drug resistance markers in each country..... 12

56 Supplementary Note 1. *P. vivax* rhAmpSeq Library Preparation..... 13

57 Supplementary Note 2. Bioinformatic Pipeline for rhAmpSeq data analysis ..... 19

58

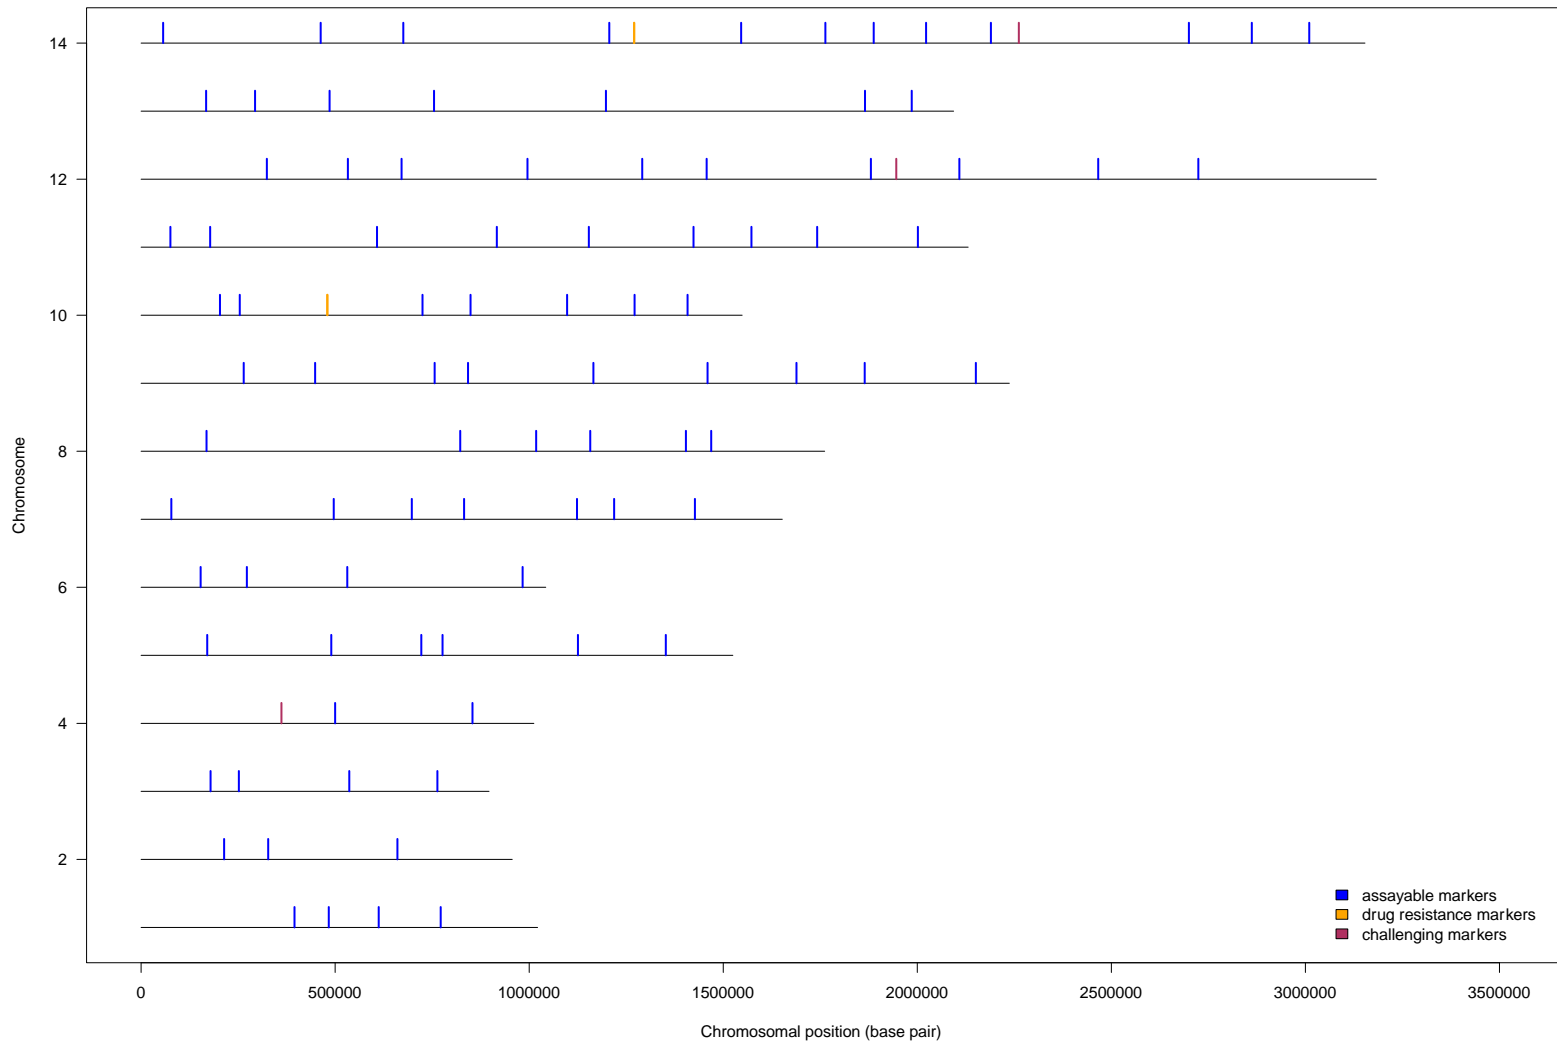

59

60 **Supplementary Figure 1. Genomic locations of the 97 nuclear genome markers.** Note, excluding the mitochondrial locus. Markers described as  
 61 “challenging” displayed low read-pair depth with *dada2* output; markers 64721 (Chromosome 4), 354590 (Chromosome 12) and 466426  
 62 (Chromosome 14) (see Figure 2b).

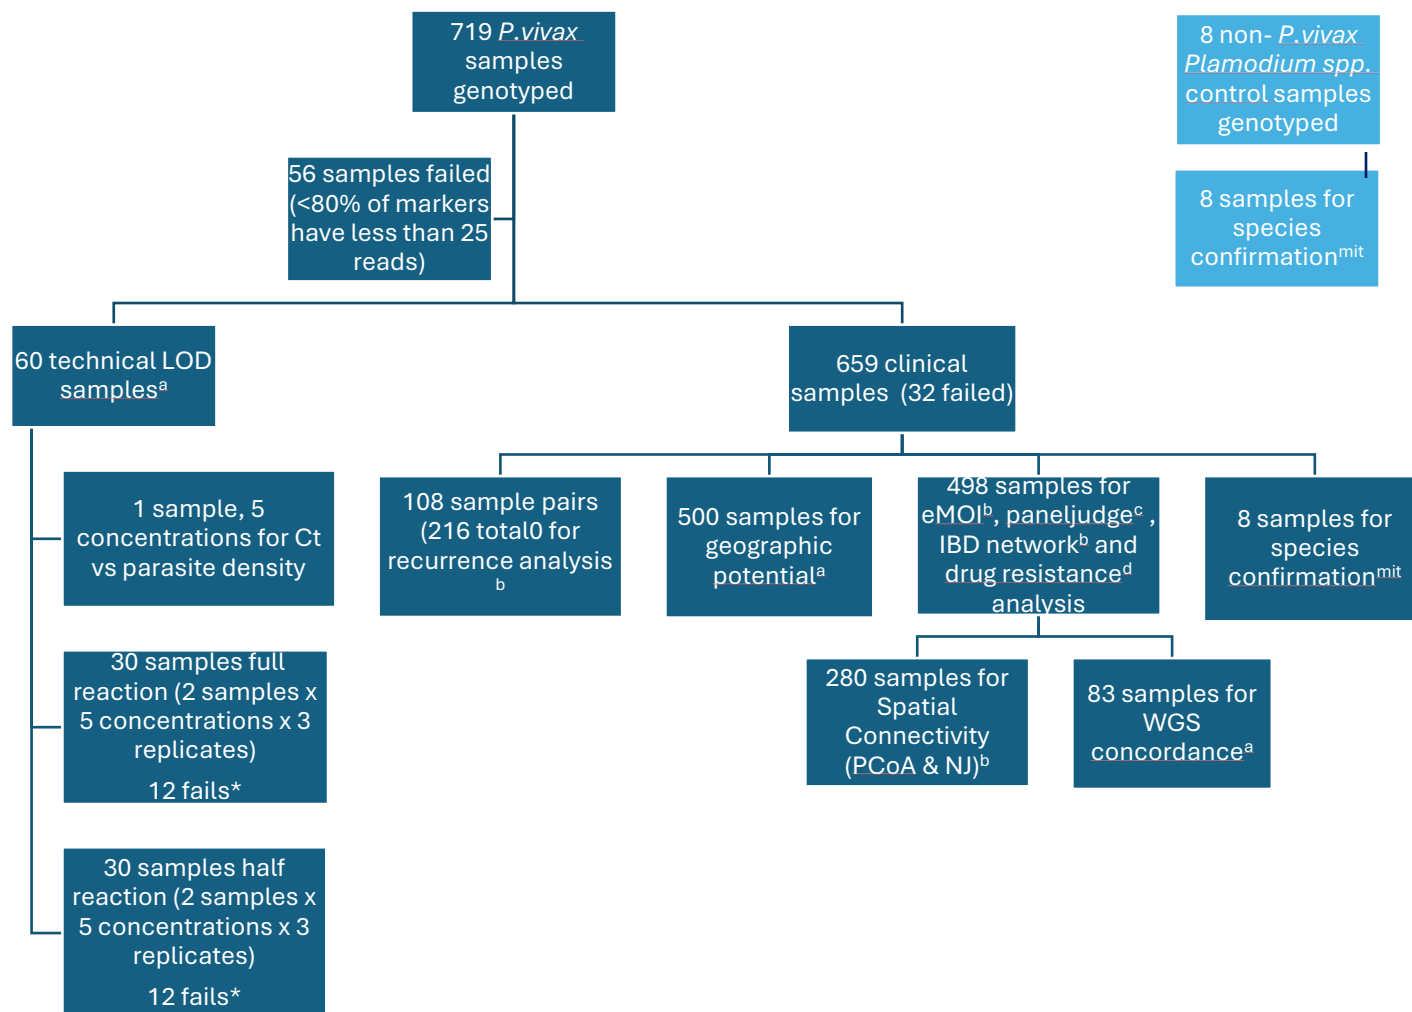

63

64 **Supplementary Figure 2. Overview flowchart of Plasmodium spp sample genotyping and analysis.** \* Samples failed here were the 2 lowest  
 65 concentrations (all under 9.6 ng/ul) for all three replicates. <sup>a</sup>97 markers used (all except mitochondria). <sup>b</sup> 92 markers used (excluding  
 66 mitochondria, Mhap marker 354590 and 4 drug resistance candidate markers). <sup>c</sup> 91 markers used (excluding mitochondria, Mhap markers  
 67 354590 and 419038, and 4 drug resistance candidate markers). <sup>d</sup> Only markers in *pvmdr1* and *pvdhps*. <sup>mit</sup> only the mitochondrial region.

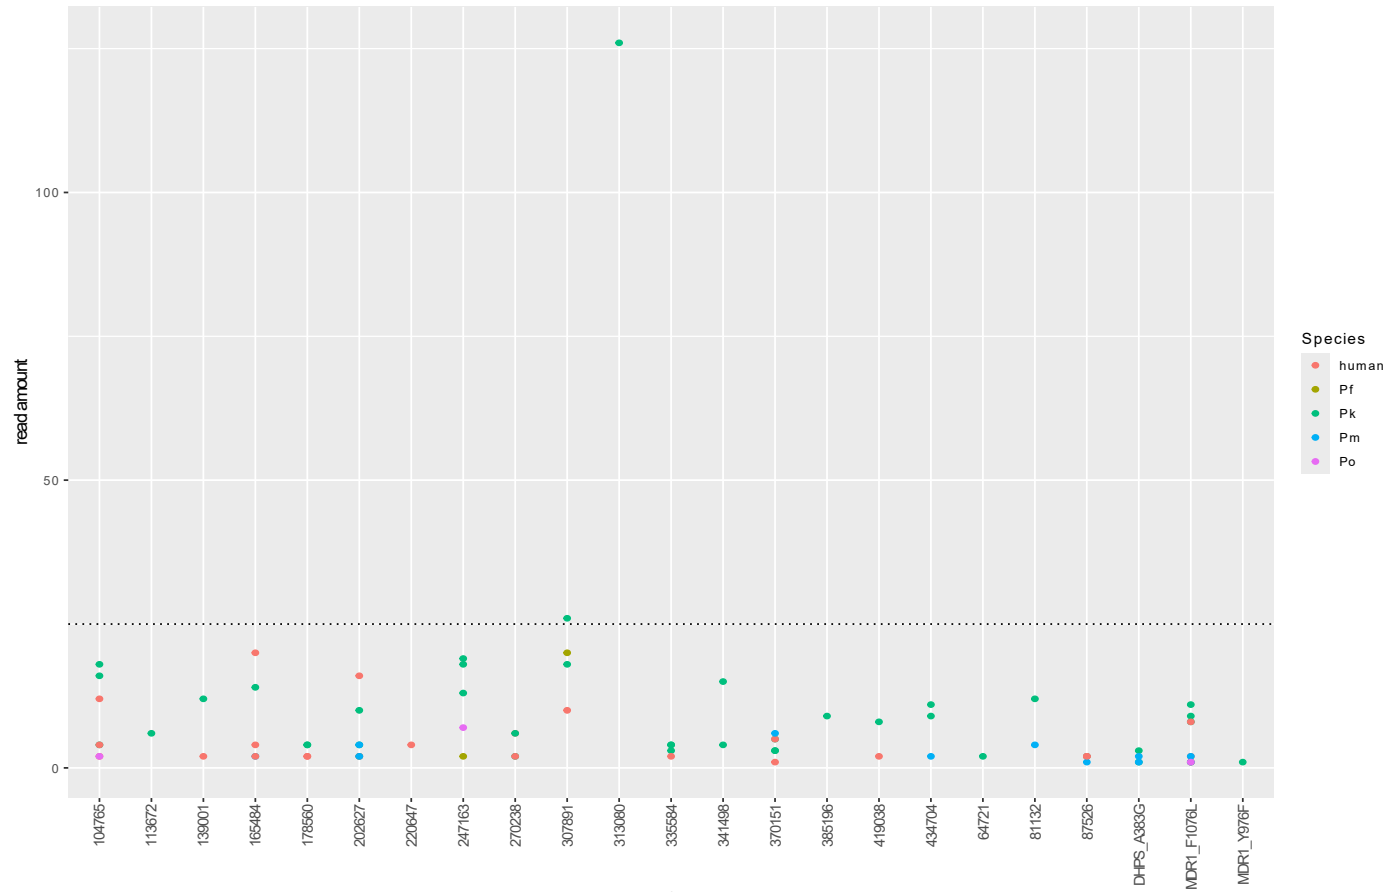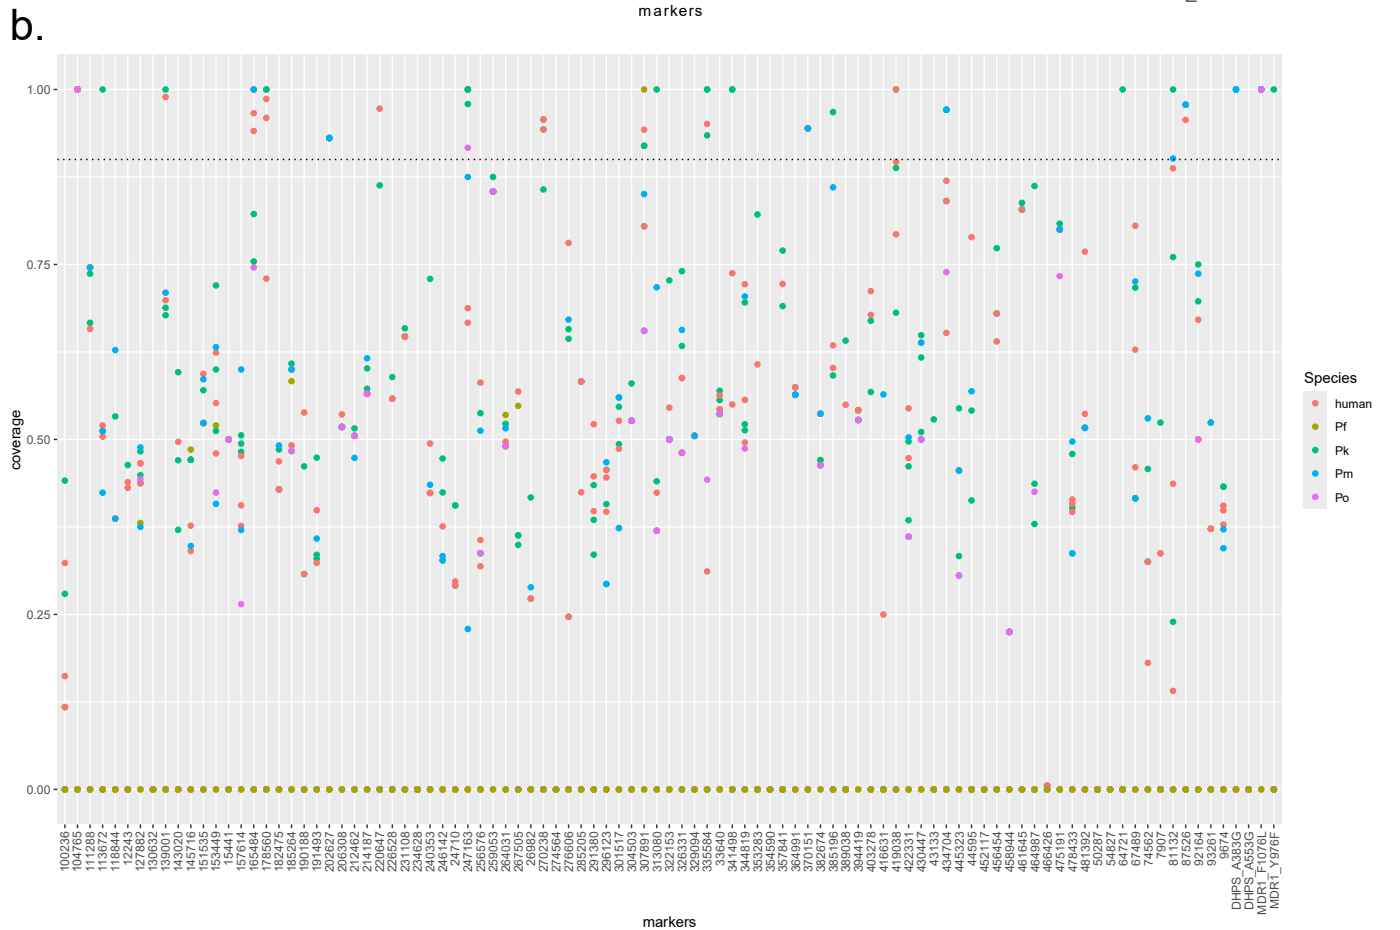

69 **Supplementary Figure 3. Specificity of the assays.** Panel a) presents coverage over all markers aside  
70 from the mitochondrial *Plasmodium* spp. marker in non-*P. vivax* samples. Samples with coverage over  
71 0.9 (90%; dotted line) were further investigated for read amount in panel b), which presents the read  
72 depth of markers from non-*P. vivax* samples with coverage over 90%. Cut off (dotted line) was set to 25  
73 for further analysis to remove background noise. The results comprise 96-plex and 384-plex runs as  
74 majority of the negative controls were processed on a pilot 96-plex run; in theory, this enhances the  
75 potential to capture non-target amplicons.  
76  
77

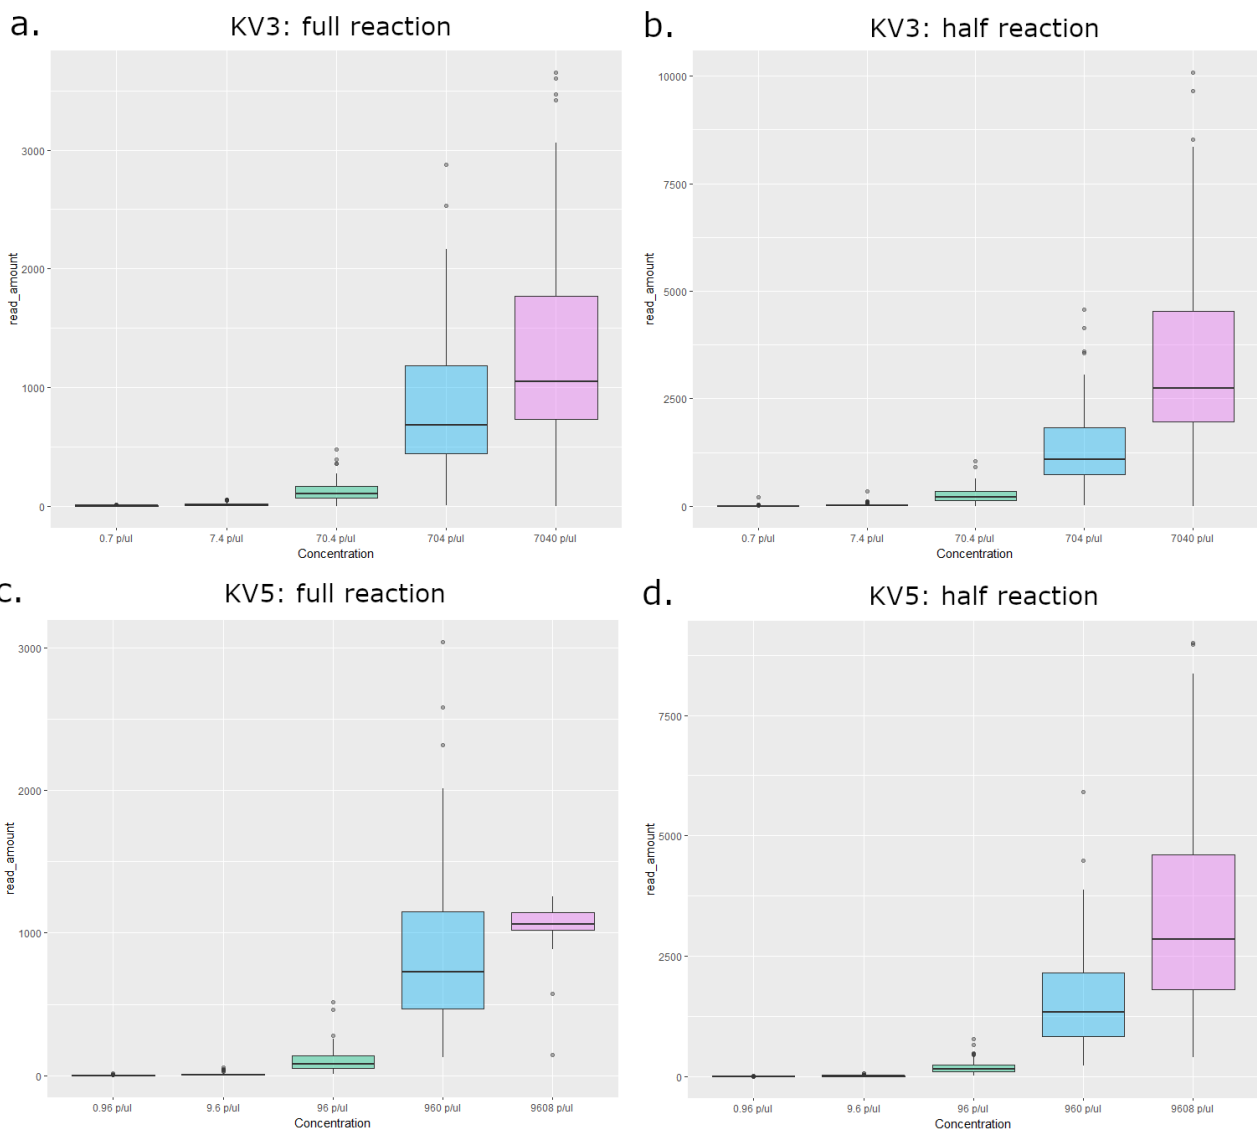

78  
79

80 **Supplementary Figure 4. Assay sensitivity using serial dilutions.** Distributions of read counts across the  
81 97 markers (excluding the mitochondrial marker) in two independent *P. vivax* serial dilutions, samples  
82 KV3 and KV5; in full (panels a and c) and half (panels b and d) reactions. Results reflect per marker read  
83 counts (read amount) averaged across the three replicates for each dilution. Concentration on the x-axis  
84 reflects parasite density, estimated as the number of parasites (p) per microliter (ul) of blood. Half  
85 reactions (10 ul reaction mix in library preparation PCR step 1, comprising 5.5 ul DNA) displayed slightly  
86 higher sensitivity than full reactions (20 ul reaction mix in PCR step 1, comprising 11 ul DNA). This result  
87 was unexpected and may reflect modest differences in the amount each library contributed to the final  
88 pool for the run, as the half and full reactions were pooled separately. Also of note, within each full and  
89 half reaction, the KV3 sample, with estimated 7,040 p/ul starting density, had slightly higher sensitivity  
90 than the KV5 sample, which has estimated 9,600 p/ul starting density. This trend was also unexpected  
91 and may reflect inaccuracies in the estimation of the amount of DNA in each sample as microscopy  
92 measures do not account for differences in DNA abundance between different *P. vivax* life cycle stages.  
93 Microscopy estimates also do not account for free DNA (i.e. DNA outside of the cells) or potential DNA  
94 degradation. All results reflect *P. vivax* sensitivity on 384-plex runs on a MiSeq instrument.  
95

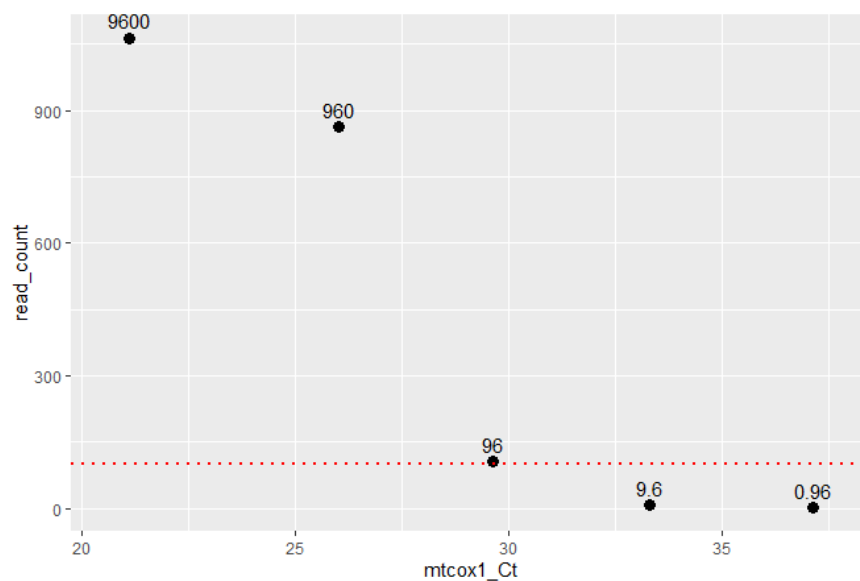

96  
97  
98 **Supplementary Figure 5. Pvmtcox1 qPCR Ct against parasite density.** Data is presented for the KV5  
99 serial dilution, with parasite densities labeled above each point. The *pvmcox1* Ct scores reflect an  
100 average across triplicates. The dashed red line delineates the threshold for an average of 100 reads per  
101 marker, which is reached at and above 96 parasites per microliter blood.

| Sample     | Parasite density (p/ul) | Average rhAmpSeq read count <sup>a</sup> | Average <i>pvmtcox1</i> Ct <sup>b</sup> | delta Ct    |
|------------|-------------------------|------------------------------------------|-----------------------------------------|-------------|
| KV3        | 704                     | 840                                      | N/A                                     | N/A         |
| <b>KV3</b> | <b>70.4</b>             | <b>125</b>                               | N/A                                     | N/A         |
| KV3        | 7.04                    | 15                                       | N/A                                     | N/A         |
| KV3        | 0.7                     | 3                                        | N/A                                     | N/A         |
| KV5        | 9,600                   | 1064                                     | 21.12                                   | 4.90        |
| KV5        | 960                     | 863                                      | 26.02                                   | 3.62        |
| <b>KV5</b> | <b>96</b>               | <b>107</b>                               | <b>29.64</b>                            | <b>3.68</b> |
| KV5        | 9.6                     | 9                                        | 33.32                                   | 3.82        |
| KV5        | 0.96                    | 2                                        | 37.14                                   | N/A         |

102  
103 **Supplementary Table 1. Assay sensitivity in the *P. vivax* serial dilutions.** Summary of the read counts  
104 derived from the rhAmpSeq assay and cycle threshold (Ct) in the *pvmtcox1* PCR in serial dilutions of *P.*  
105 *vivax* samples KV3 and KV5. The KV3 and KV5 dilutions at/above which a minimum of 100 reads are  
106 yielded on average for each of the markers in the rhAmpSeq assay are highlighted in bold; below a Ct of  
107 30-34, an average of 100 reads per marker is expected. <sup>a</sup>Averaged across replicates (n=3) across 97  
108 markers in the assay (excluding the mitochondrial marker which has multiple copies per cell). <sup>b</sup> Averaged  
109 across triplicates.

110

| 10% minor allele threshold | Mhap homozygous reference | Mhap homozygous alternate          | Mhap heterozygous                    | Mhap genotype fail |
|----------------------------|---------------------------|------------------------------------|--------------------------------------|--------------------|
| WGS homozygous reference   | 52.97%<br>(17,440/32,923) | 0.006%<br>(2 <sup>a</sup> /32,923) | 0.316%<br>(104/32,923)               | 980                |
| WGS homozygous alternate   | 0.055%<br>(17/32,923)     | 40.85%<br>(13,449/32,923)          | 0.368%<br>(121 <sup>b</sup> /32,923) |                    |
| WGS heterozygous           | 0.844%<br>(278/32,923)    | 0.149%<br>(49/32,923)              | 4.444%<br>(1,463/32,923)             |                    |
| WGS genotype fail          | 1,318                     |                                    |                                      | 54                 |

111

112 **Supplementary Table 2. Concordance in SNP-based genotype calling between amplicon sequencing**  
 113 **and whole genome sequencing (WGS) data at 10% threshold.** The data is derived from genotype calls  
 114 derived from the VCF pipeline at 425 biallelic SNPs in 83 independent *P. vivax* samples with high quality  
 115 WGS and amplicon sequencing data using the default 10% minor allele threshold. The numerator and  
 116 denominator reflect the number of genotypes meeting the given criteria and the total number of  
 117 successful genotyping calls across the dataset (32,923) respectively. <sup>ab</sup>Two and one genotype  
 118 respectively with a second alternate allele.  
 119

| <b>1% minor allele threshold</b> | Mhap homozygous reference | Mhap homozygous alternate               | Mhap heterozygous                    | Mhap genotype fail |
|----------------------------------|---------------------------|-----------------------------------------|--------------------------------------|--------------------|
| WGS homozygous reference         | 52.9%<br>(17,430/32,923)  | 0.006%<br>(2 <sup>a</sup> /32,923)      | 0.346%<br>(114/32,923)               |                    |
| WGS homozygous alternate         | 0.055%<br>(18/32,923)     | 39.89%<br>(13,133 <sup>b</sup> /32,923) | 1.324%<br>(436 <sup>c</sup> /32,923) |                    |
| WGS heterozygous                 | 0.702%<br>(231/32,923)    | 0.021<br>(7/32,923)                     | 4.714%<br>(1,552/32,923)             |                    |
| WGS genotype fail                | 1,318                     |                                         |                                      | 54                 |

120  
 121 **Supplementary Table 3. Concordance in SNP-based genotype calling between amplicon sequencing**  
 122 **and whole genome sequencing (WGS) data at 1% threshold.** The data is derived from genotype calls  
 123 derived from the VCF pipeline at 425 biallelic SNPs in 83 independent *P. vivax* samples with high quality  
 124 WGS and amplicon sequencing data using a 1% minor allele threshold. The numerator and denominator  
 125 reflect the number of genotypes meeting the given criteria and the total number of successful  
 126 genotyping calls across the dataset (32,923) respectively. <sup>abc</sup> 2, 1 and 4 respectively genotypes with a  
 127 second alternate allele.  
 128

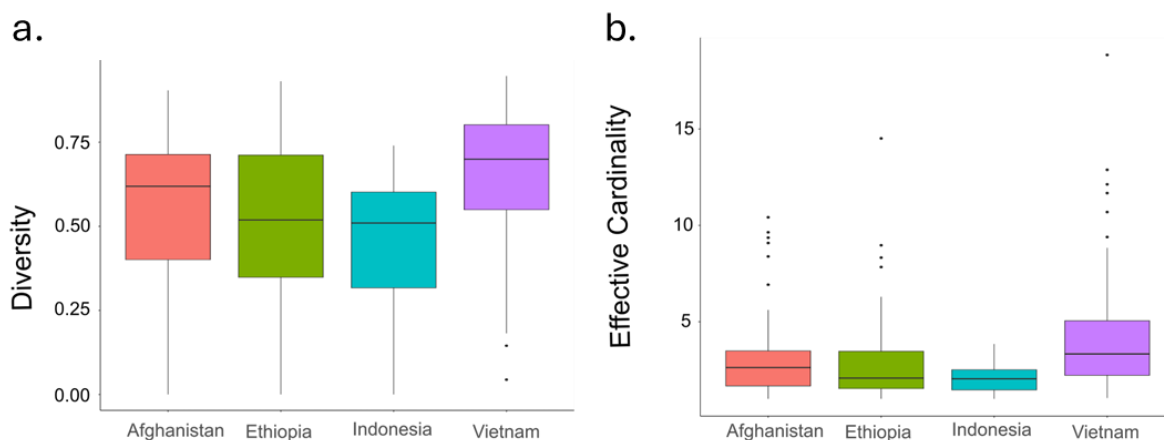

129  
130  
131  
132  
133  
134  
135  
136

**Supplementary Figure 6. Marker diversity by country.** Panel a) presents heterozygosity measures and panel b) presents effective cardinality scores in n=498 independent samples. Each boxplot presents the median, interquartile range and min and max value for the heterozygosity (panel a) and effective cardinality (panel b).

| Sample       | Run   | PCR-based Species    | Country     | depth  | coverage | Mitochondrial <i>Plasmodium</i> spp |
|--------------|-------|----------------------|-------------|--------|----------|-------------------------------------|
| QECK_1_NV22  | Run 2 | <i>Homo sapiens</i>  | N/A         | 2      | 0.565    | N/A                                 |
| QECK_2_NV22  | Run 2 | <i>Homo sapiens</i>  | N/A         | 0      | 0.000    | N/A                                 |
| QECK_3_NV22  | Run 2 | <i>Homo sapiens</i>  | N/A         | 0      | 0.000    | N/A                                 |
| QECK_4       | Run 7 | <i>Homo sapiens</i>  | N/A         | 0      | 0.000    | N/A                                 |
| RDM_47_NV22  | Run 2 | <i>P. falciparum</i> | Indonesia   | 5212   | 0.996    | <i>P. falciparum</i>                |
| K1           | Run 7 | <i>P. falciparum</i> | Unknown     | 49,058 | 1.000    | <i>P. falciparum</i>                |
| RDM_44       | Run 2 | <i>P. malariae</i>   | Uganda      | 56     | 1.000    | <i>P. malariae</i>                  |
| RDM_45       | Run 2 | <i>P. malariae</i>   | Uganda      | 28     | 1.000    | <i>P. malariae</i>                  |
| RDM_67_NV22  | Run 2 | <i>P. ovale</i>      | Uganda      | 150    | 0.980    | <i>P. ovale</i>                     |
| KK_64_NV22   | Run 2 | <i>P. knowlesi</i>   | Malaysia    | 2318   | 1.000    | <i>P. knowlesi</i>                  |
| KK_107_NV22  | Run 2 | <i>P. knowlesi</i>   | Malaysia    | 68     | 1.000    | <i>P. knowlesi</i>                  |
| KK_95_NV22   | Run 2 | <i>P. knowlesi</i>   | Malaysia    | 58     | 1.000    | <i>P. knowlesi</i>                  |
| AF001_099_D0 | Run 3 | <i>P. vivax</i>      | Afghanistan | 1376   | 1.000    | <i>P. vivax</i>                     |
| M004         | Run 3 | <i>P. vivax</i>      | Bangladesh  | 158    | 1.000    | <i>P. vivax</i>                     |
| 05027V-1     | Run 2 | <i>P. vivax</i>      | Colombia    | 896    | 1.000    | <i>P. vivax</i>                     |

|             |       |                 |           |      |       |                 |
|-------------|-------|-----------------|-----------|------|-------|-----------------|
| CQE001      | Run 3 | <i>P. vivax</i> | Ethiopia  | 1058 | 1.000 | <i>P. vivax</i> |
| ID004020_D0 | Run 6 | <i>P. vivax</i> | Indonesia | 160  | 1.000 | <i>P. vivax</i> |
| MV1         | Run 2 | <i>P. vivax</i> | Malaysia  | 1044 | 1.000 | <i>P. vivax</i> |
| MIDAS-129   | Run 2 | <i>P. vivax</i> | Sudan     | 2158 | 1.000 | <i>P. vivax</i> |
| VN001_002   | Run 3 | <i>P. vivax</i> | Vietnam   | 168  | 1.000 | <i>P. vivax</i> |

137

138 **Supplementary Table 4. Plasmodium spp. classification.** Details of the *Plasmodium* spp. Classification  
139 determined at the mitochondrial amplicon in 4 human controls, 8 independent non-vivax infections, and  
140 8 independent *P. vivax* infections selected for representation of a range of countries. Low depth and  
141 coverage of the mitochondrial amplicon was confirmed in the 4 human controls, and concordance  
142 between PCR-based and mitochondrial classification of *Plasmodium* spp. was confirmed in all malaria  
143 infections. The number of samples in each run were as follows: run 2 (n=96), runs 3-6 (n=384) and run 7  
144 (n=48).

145

| Gene                                      | Chr | Position | Mutation | Drug       | Freq, % (no./No.)<br>Afghanistan | Freq, % (no./No.)<br>Ethiopia | Freq, % (no./No.)<br>Sumatra, Indonesia | Freq, % (no./No.)<br>Vietnam |
|-------------------------------------------|-----|----------|----------|------------|----------------------------------|-------------------------------|-----------------------------------------|------------------------------|
| <i>pvm<sub>1</sub></i><br>(PVP01_1010900) | 10  | 479908   | F1076L   | CQ         | 100 (159/159)                    | 100 (215/215)                 | 100 (38/38)                             | 92 (80/87)                   |
| <i>pvm<sub>1</sub></i><br>(PVP01_1010900) | 10  | 480207   | Y976F    | CQ, AQ+SP  | 0 (0/159)                        | 41 (81/198)                   | 100 (38/38)                             | 73 (62/85)                   |
| <i>pvdhps</i><br>(PVP01_1429500)          | 14  | 1270401  | A553G    | Antifolate | 0 (0/159)                        | 0 (0/215)                     | 0 (0/38)                                | 2 (2/90)                     |
| <i>pvdhps</i><br>(PVP01_1429500)          | 14  | 1270911  | A383G    | Antifolate | 2 (3/157)                        | 10 (20/205)                   | 53 (20/38)                              | 80 (68/85)                   |

146

147 **Supplementary Table 5. Prevalence of orthologous drug resistance markers in each country.** Mutation prevalence was calculated with homozygous calls  
148 only. Abbreviations: Chr, chromosome; Freq, Frequency; AQ, amodiaquine; CQ, chloroquine; MQ, mefloquine; SP, sulfadoxine-  
149 pyrimethamine.

150 **Supplementary Note 1. *P. vivax* rhAmpSeq Library Preparation**

151  
152 Individual rhAmpSeq primers (see Appendix I) with standard desalting purification were purchased from  
153 Integrated DNA Technologies (IDT) and reconstituted to 100 $\mu$ M with IDTE, pH 7.5. rhAmp PCR reactions  
154 were prepared with 4x rhAmpSeq Library Mix 1 (IDT) and varied primer concentrations optimized to  
155 achieve moderately uniform depth across amplicons (range 0.2 – 5.7 $\mu$ M). For full reactions, a total of  
156 11 $\mu$ l genomic DNA (regardless of parasite density) was included in a total PCR reaction volume of 20 $\mu$ l.  
157 The rhAmp PCR reaction was run using the following settings: Enzyme activation: 10 min at 95°C; 14  
158 cycles of Amplification: Denaturation: 15 sec at 95°C; Annealing: 8 min at 61°C; Enzyme deactivation: 15  
159 min at 99.5°C. The rhAmp PCR products were then diluted in nuclease-free water using 1 in 20 dilutions  
160 to a total volume of 100 $\mu$ l. Indexing PCR reactions were prepared with the following components: 2 $\mu$ l of  
161 nuclease-free water, 2 $\mu$ l of xGEN 10nt Unique Dual Index, 5 $\mu$ l of 4x rhAmpSeq Library Mix 2 (IDT), and  
162 11 $\mu$ l of diluted PCR1 product. The Indexing PCR reaction was run using the following settings: Enzyme  
163 activation: 3 min at 95°C; 24 cycles of Amplification: Denaturation: 15 sec at 95°C; Annealing: 30 sec at  
164 60°C; Extension: 30 sec at 72°C; Final Extension: 1 min at 72°C. Half reactions were run using half the  
165 quantity of input genomic DNA and rhAmpSeq Library Mix 1 for the rhAmp PCR, and half the rhAmp PCR  
166 product input and rhAmpSeq Library Mix 2 for the Indexing PCR reactions. The thermocycling conditions  
167 for the half reactions were the same as for the full reactions.

168  
169 After amplification, we pooled up to 384 samples with 5 $\mu$ l of each individual library combined in a 1.5mL  
170 LoBind Microcentrifuge tube. The pooled libraries were purified to remove primer dimers using 0.7X  
171 SPRI beads (Beckman Coulter). After incubating for 10 minutes at room temperature, a magnetic rack  
172 was used to separate beads and remove the supernatant. Beads were washed twice with freshly  
173 prepared 80% ethanol and left to stand for 3 minutes to enable any leftover ethanol to evaporate. The  
174 library (of preferred interest size) was then eluted in 22 $\mu$ l of IDTE, pH 8 (IDT). The success of library  
175 purification was evaluated by running pre- and post- bead cleanup libraries with capillary  
176 electrophoresis using an Agilent 4150 TapeStation system using D1000 reagents and ScreenTape. The  
177 pooled libraries were quantified using Colibri™ Library Quantification Kit and diluted accordingly to 4nM  
178 concentration. The diluted library was the sequenced on an Illumina MiSeq platform at 9pM final  
179 loading concentration with 10% PhiX. Sequencing was conducted using the Illumina v2 kit following the  
180 protocol for paired end 150 bp reads.

181

182 Appendix I - *Plasmodium vivax* rhAmpSeq Primer Sequences

183

| AssayID_IDT           | Chr | Start   | End     | Target | *Marker type | PrimerSequence_FWD                                    | PrimerSequence_REV                                      |
|-----------------------|-----|---------|---------|--------|--------------|-------------------------------------------------------|---------------------------------------------------------|
| RH.9CAFEBAA3F384A0Z0Z | 1   | 395355  | 395521  | 7907   | Mhap         | /rhSeq-f/ACN CCC CAA ATG TGA ATA ArCT TCC /GT4/       | /rhSeq-r/ACG TGG CTA CTA CCC CArG TGG T/GT3/            |
| RH.2960ABE5E62C470Z0Z | 1   | 483735  | 483883  | 9674   | Mhap         | /rhSeq-f/TCC AAA CTN AGC TCC TTG ATrG TTG T/GT3/      | /rhSeq-r/CAA CTT TGG CAT CCT CTA TAA CArC GGA T/GT1/    |
| RH.B2905CD19921440Z0Z | 1   | 612225  | 612348  | 12243  | Mhap         | /rhSeq-f/ACC TGG AAA CTC CCT TGT TrGC AAT /GT2/       | /rhSeq-r/ATA CGA ATT CGC ATC AGA CGrG AGA G/GT4/        |
| RH.79D714EC610C448Z0Z | 1   | 772093  | 772211  | 15441  | Mhap         | /rhSeq-f/TCC GAA CCA TCG CTG TTA rCCA CT/GT2/         | /rhSeq-r/CTG CCC CTT TCT CCA GAG rCAG TA/GT2/           |
| RH.964D47B0B088468Z0Z | 2   | 213958  | 214133  | 24710  | Mhap         | /rhSeq-f/ACC TGG AAT GCT CCA AAA ATT rCCT TG/GT1/     | /rhSeq-r/GGT AGT GTA CAG GGA AAT CAC rCCC GA/GT1/       |
| RH.AC2609A2062C4D4Z0Z | 2   | 327552  | 327739  | 26982  | Mhap         | /rhSeq-f/TTC GCA ACA AGA GGA GCA AArC ATA G/GT2/      | /rhSeq-r/CCG TCA AAT GGT AAA GCG TrGA AGN /GT4/         |
| RH.C0DE1AD20EB44E6Z0Z | 2   | 660463  | 660614  | 33640  | Mhap         | /rhSeq-f/GCA GCG CAT GGA AAG TAT TGrC TAG A/GT3/      | /rhSeq-r/TGA TCC ACT GCC TTT TGG TAG rCAT TC/GT3/       |
| RH.ADD86C5C7CEE4FBZ0Z | 3   | 178937  | 179094  | 43133  | Mhap         | /rhSeq-f/TGG CAT AGC TGC GAA GTT rATT CA/GT3/         | /rhSeq-r/NTC CAC GTG GCT GTA TrAG GGG /GT2/             |
| RH.AC6AF27F13E1456Z0Z | 3   | 252061  | 252170  | 44595  | Mhap         | /rhSeq-f/TTC GAT TTG GAA TCC CCT TrCT GCN /GT4/       | /rhSeq-r/CAA GAA AAC CCC ACC TTT GrCA CAA /GT1/         |
| RH.7702F5B5FFEA486Z0Z | 3   | 536620  | 536711  | 50287  | Mhap         | /rhSeq-f/TCC CTG CTG AAG GAC TCrC GAG C/GT1/          | /rhSeq-r/ACT CAC CGN CAA CGT TrGG GCG /GT3/             |
| RH.10A2E23284CC46CZ0Z | 3   | 763605  | 763660  | 54827  | Mhap         | /rhSeq-f/CTC CTG GCA TGG ACC CrCA CCT /GT3/           | /rhSeq-r/TAN AGC AGG CGG TAG AGrC TTC C/GT1/            |
| RH.00A0825CCA024A4Z0Z | 4   | 361787  | 361899  | 64721  | Mhap         | /rhSeq-f/GAC CAA AGA GGA GAA AAC GArA AAA C/GT4/      | /rhSeq-r/TCC TCT TTC ACC TGC TCG rCAT GT/GT3/           |
| RH.9A9B6B1CE8ED464Z0Z | 4   | 500160  | 500273  | 67489  | Mhap         | /rhSeq-f/CAT GAG GTA GTA GCT CTT CGA rCGA GT/GT1/     | /rhSeq-r/GCT TCC CCA TGG AGG GrCC TCC /GT3/             |
| RH.FC72753AD141415Z0Z | 4   | 853861  | 853944  | 74562  | Mhap         | /rhSeq-f/CTG CNC AGT TTG ATC AGT CrCA CCC /GT1/       | /rhSeq-r/CTT CAT TAT TTC GAA TGG CTT TCT rGGA AG/GT1/   |
| RH.FDE3FDC2B0774C8Z0Z | 5   | 170476  | 170547  | 81132  | Mhap         | /rhSeq-f/TGA ATC CTC CGA AAA CGA TTC rCTC AG/GT3/     | /rhSeq-r/GCA GTC TGA AGA TTC TGA TGArA AGA A/GT3/       |
| RH.34E5DDB83D7D4F7Z0Z | 5   | 490198  | 490244  | 87526  | Mhap         | /rhSeq-f/CCC TCA TCA ATC ACT TCT TCC TArC AGA A/GT2/  | /rhSeq-r/CTT TTG CGC AAA TAA ATC CAA GTrG AAA C/GT4/    |
| RH.34F85DB3B3264F2Z0Z | 5   | 722013  | 722089  | 92164  | Mhap         | /rhSeq-f/GAC GAG CAA ATT TAA GAA GCT CTC rGTA GC/GT1/ | /rhSeq-r/CTG CCA CAT CCT AAA TCA CAT ACT TrCA TAA /GT4/ |
| RH.6A1D6D2210DF49BZ0Z | 5   | 776828  | 776973  | 93261  | Mhap         | /rhSeq-f/ATG AGA TTC ACA CTG TAG TCG GrGG CAG /GT2/   | /rhSeq-r/CCT CGT ATC GTT CCT TNA GTC rCTC TT/GT4/       |
| RH.83D956F8758C4BBZ0Z | 5   | 1125680 | 1125748 | 100236 | Mhap         | /rhSeq-f/CCA CGC AGA GTG CTT TTrC CAT C/GT1/          | /rhSeq-r/CTT GTC TCA CCG CTG CrCC TCA /GT3/             |

|                       |   |         |         |        |      |                                                           |                                                              |
|-----------------------|---|---------|---------|--------|------|-----------------------------------------------------------|--------------------------------------------------------------|
| RH.42DF2C222BA74C2Z0Z | 5 | 1352101 | 1352165 | 104765 | Mhap | /rhSeq-f/GGT TCG ACA TTA TGA GTA GAC ACrG TTT G/GT4/      | /rhSeq-r/CGT TGA CCT TTT GGG AAA CAT ArCA CAT /GT1/          |
| RH.46D4266C768744DZ0Z | 6 | 153460  | 153574  | 111288 | Mhap | /rhSeq-f/CAA TTT TGC GAG GGC TAT TCrC GCA C/GT1/          | /rhSeq-r/TCA CAT GAA GTG TGC AGT TrGC TGG /GT2/              |
| RH.5312BCFBF8D8457Z0Z | 6 | 272690  | 272815  | 113672 | Mhap | /rhSeq-f/TTA GAA GTC AAT GCG ACG CrCA GAT /GT1/           | /rhSeq-r/TCT GAA TGA CCT TCC GGA rGCT GG/GT2/                |
| RH.B21F2DF1DA6A419Z0Z | 6 | 531256  | 531393  | 118844 | Mhap | /rhSeq-f/AGT CCT GCT CTC AGG GrGT CCT /GT4/               | /rhSeq-r/AGG ATG CTC ACC AGG CrGG ACA /GT2/                  |
| RH.4133F987D8A44E5Z0Z | 6 | 983157  | 983333  | 127882 | Mhap | /rhSeq-f/GGA TAT GGA AGG CAN CGG ATrA TTC C/GT4/          | /rhSeq-r/TAA TCC CTT CCC CAT TCT CGrA ATC C/GT4/             |
| RH.50720784FEED46AZ0Z | 7 | 78143   | 78172   | 130632 | Mhap | /rhSeq-f/GTT CTT TTA AAT AAT GCA CCT TTT TCG rCCA TC/GT1/ | /rhSeq-r/GAA AAC CAA AAT AGA TGA AAG TTT ACA AArC AGT G/GT2/ |
| RH.3E77B333C8DB4D2Z0Z | 7 | 496520  | 496613  | 139001 | Mhap | /rhSeq-f/AGA ATG TGT CGG ATT TTC GAT TAG rGAC TC/GT1/     | /rhSeq-r/ACA ACC GCA TGT ACA ATC TTT TrGA AGG /GT4/          |
| RH.DEF0990049A641CZ0Z | 7 | 697428  | 697579  | 143020 | Mhap | /rhSeq-f/CTC ACT CAT GGA TGG GTA CAT AGrA AAA C/GT4/      | /rhSeq-r/GGG AAC CAC ATT TAC AGA TTA TCA ArAT GAG /GT2/      |
| RH.0AB7872636F3460Z0Z | 7 | 832233  | 832371  | 145716 | Mhap | /rhSeq-f/TAC ACC CNT TCG TTT AGC CrAT TTG /GT4/           | /rhSeq-r/TGA TGT AAT CCC CTG CAC AGrC TCT G/GT4/             |
| RH.C03EF5B621FF4C0Z0Z | 7 | 1123202 | 1123330 | 151535 | Mhap | /rhSeq-f/CGA GAT GTA AAC GAA GGT GArA AGG G/GT2/          | /rhSeq-r/AGA CTC ACC AGA TTG ACC ArGA CTC /GT4/              |
| RH.CBFE7DBF5A6E4D8Z0Z | 7 | 1218911 | 1219036 | 153449 | Mhap | /rhSeq-f/GAG ATT TTG CTG AAG TAC TAT AAG GrCA CGA /GT2/   | /rhSeq-r/GAT AAT TTC CTT CAG CTC TGT CAA rGAC GT/GT2/        |
| RH.0A6CDC396639498Z0Z | 7 | 1427121 | 1427291 | 157614 | Mhap | /rhSeq-f/GGT AGT CGC AAA GAA CAC TrCA NGT /GT1/           | /rhSeq-r/CAG GAA ATT TGG AAA CGC CArG TAT G/GT3/             |
| RH.82A3E1ACDE394D8Z0Z | 8 | 168547  | 168665  | 165484 | Mhap | /rhSeq-f/TGT TCC TCA CTT CTG AGA GTrA GAA G/GT3/          | /rhSeq-r/GAC CAA GTG ACG AAG CArC TAC A/GT4/                 |
| RH.CC11B8DE53FA43DZ0Z | 8 | 822406  | 822480  | 178560 | Mhap | /rhSeq-f/AAA CCG AAC GTT TTA AAT GGG rCAC GT/GT2/         | /rhSeq-r/GAC AGA ACC CAC TCG TAT ATC rCCA TT/GT2/            |
| RH.4166D3F17C374C4Z0Z | 8 | 1018073 | 1018248 | 182475 | Mhap | /rhSeq-f/CCT CGA GAA GGC CAT AGT GrAG CAT /GT3/           | /rhSeq-r/GAG AGG GTC ACC GGG TrCT AAG /GT3/                  |
| RH.6818F263362044BZ0Z | 8 | 1157514 | 1157634 | 185264 | Mhap | /rhSeq-f/AGA GGC TCC TAA AAG TGC TTrG TTA A/GT1/          | /rhSeq-r/GTG GGT ACT CCT CAA GTG TTT rAAT AT/GT1/            |
| RH.CD3AC424DC4D417Z0Z | 8 | 1403792 | 1403883 | 190188 | Mhap | /rhSeq-f/CAC GAA TAC ATG CAT GTG TGT rGCG CA/GT1/         | /rhSeq-r/TCG TCG TCG TTA TGT ATG CTG rCAG TC/GT2/            |
| RH.D5E3F1910FBA4C7Z0Z | 8 | 1468975 | 1469148 | 191493 | Mhap | /rhSeq-f/GAG ATC ACC AGA CCA CAG rGAG CA/GT2/             | /rhSeq-r/CTG CAT TCA TGT CNT TCG AAA ArAT TGT /GT1/          |
| RH.1B258A1478D74CDZ0Z | 9 | 264626  | 264698  | 202627 | Mhap | /rhSeq-f/GTT TGA GGA AAA TCT CGA AAG AAG AArC TAG C/GT3/  | /rhSeq-r/TTG CTT ATC TCA GCA CTG CTT TrGG TCA /GT3/          |
| RH.36E8980535C54B7Z0Z | 9 | 448574  | 448630  | 206308 | Mhap | /rhSeq-f/CCA GCT GTT TAT TTT CAA TCA AGT rGGT GA/GT1/     | /rhSeq-r/CAC GAG AAA AGA AAA CGA AAT TGA rAAG CT/GT4/        |
| RH.51F901C8B81F436Z0Z | 9 | 756312  | 756407  | 212462 | Mhap | /rhSeq-f/CAT GCC CAC GCA GGT ArCA CTC /GT4/               | /rhSeq-r/CAC TCT CTN CAT GGG ATA ACT rAAA AC/GT2/            |

|                       |    |         |         |             |      |                                                                                                               |                                                                                                                          |
|-----------------------|----|---------|---------|-------------|------|---------------------------------------------------------------------------------------------------------------|--------------------------------------------------------------------------------------------------------------------------|
| RH.C5069931FF214E6Z0Z | 9  | 842507  | 842645  | 214187      | Mhap | /rhSeq-f/TAA CCT CTT CAG CAT GAG AGT rCAT<br>CG/GT4/                                                          | /rhSeq-r/CCA ATC GAA AGG TTG GCC ArCT TTA<br>/GT4/                                                                       |
| RH.290757F70A964E4Z0Z | 9  | 1165616 | 1165689 | 220647      | Mhap | /rhSeq-f/TTT GCC TCC CTA CTT GAA rGTA CG/GT2/                                                                 | /rhSeq-r/CGA CAT TAA CCT GAA CAC CT rG GTC<br>A/GT4/                                                                     |
| RH.BD4EC483E885416Z0Z | 9  | 1459600 | 1459729 | 226528      | Mhap | /rhSeq-f/GTC CTG TTT TTG GAA AGG GTrA TNG T/GT3/<br>/rhSeq-f/AGC AAG GAC AAG ATG AGG AT rG AAC<br>A/GT4/      | /rhSeq-r/CAA AGC TAG CTG CGT GGrG TTC<br>T/GT2/<br>/rhSeq-r/GCA TTT AAG GAC ATG CAA CTG rGAA<br>TC/GT4/                  |
| RH.52CD33BD1DC7471Z0Z | 9  | 1688611 | 1688696 | 231108      | Mhap | /rhSeq-f/CAT CAT CAC ATA TGC TAT CAT TGT rCTG<br>CC/GT4/                                                      | /rhSeq-r/ACA AGT ACA AAA CGA TGA GCA AAA<br>rGTG GA/GT2/                                                                 |
| RH.E03EC290DCDC420Z0Z | 9  | 1864594 | 1864642 | 234628      | Mhap | /rhSeq-f/CTT CTG AAT TTT TCA TAA ATT CAT CCC<br>rATT GC/GT1/                                                  | /rhSeq-r/GAG ATG GTT TAC CTT CAC TTC TrCA<br>ACC /GT4/                                                                   |
| RH.F6F8C3D0644D440Z0Z | 10 | 203316  | 203481  | 246142      | Mhap | /rhSeq-f/GCT CAC TTG GTT TCT TTT TAC CArG AAT<br>G/GT2/                                                       | /rhSeq-r/AGG AAA GCA ACA GGG CAT rCCN<br>AA/GT4/                                                                         |
| RH.5B17C2D0F468424Z0Z | 10 | 254364  | 254412  | 247163      | Mhap | /rhSeq-f/GTT TTA CCA GAA TAT GTG GAG CAT rGAA<br>AG/GT4/                                                      | /rhSeq-r/GCG TAT AGG ATC TGA ATA GTC ATC<br>GrAT TAG /GT4/                                                               |
| RH.0D4A6DF10E97412Z0Z | 10 | 479907  | 479908  | MDR1_F1076L | Drug | /rhSeq-f/TTT AGG GAC ATC AAC TTC CCG rGCG<br>TA/GT2/                                                          | /rhSeq-r/AGA CGC TAA TAA ATT CGA TGC TrCT<br>GGG /GT2/                                                                   |
| RH.45AE3D12F5854F9Z0Z | 10 | 480206  | 480207  | MDR1_Y976F  | Drug | /rhSeq-f/TTC TTC TCT ACA TCC TTG TTG GrCT GCT<br>/GT4/                                                        | /rhSeq-r/CTC ACT TTA TAG TGC TCT TCC TTrG<br>TGA G/GT1/                                                                  |
| RH.DEAB619F5DDE469Z0Z | 10 | 725009  | 725169  | 256576      | Mhap | /rhSeq-f/GCT GTT GAT ATC AAA TGT GCT rCGT<br>CC/GT4/                                                          | /rhSeq-r/AAG AAG AGC AAG AAG GAG TTrC ACC<br>C/GT4/                                                                      |
| RH.C93D7255B094471Z0Z | 10 | 848868  | 848916  | 259053      | Mhap | /rhSeq-f/GTA AAA CTG TTT GAT ATC CCC GTT rGGT<br>TA/GT4/                                                      | /rhSeq-r/CTT GGA AAG ACA ACA AGA AAC ArCG<br>GAG /GT2/                                                                   |
| RH.D97789F3C3B0468Z0Z | 10 | 1097783 | 1097940 | 264031      | Mhap | /rhSeq-f/GAT GAA TTC ATC CGT TTG GC rG ATG G/GT4/<br>/rhSeq-f/GCT AAT GTC TCT ACT AAC GTC TCT rACT<br>AA/GT3/ | /rhSeq-r/TGN AAA AGC TAA ACA TCC TAA AC rG<br>AGC T/GT3/<br>/rhSeq-r/CAC GCA GGA GGC AAA NTA TrCA TTT<br>/GT2/           |
| RH.25183DF8EA034DAZ0Z | 10 | 1408100 | 1408170 | 270238      | Mhap | /rhSeq-f/GCA AAA TGA TGA GTA TTC CAT GAT TTT<br>rCTG TG/GT1/                                                  | /rhSeq-r/GTA AAA AGG ATG CTC ATT TTG CT rG<br>CAG G/GT1/                                                                 |
| RH.6C64A045C9CA4D5Z0Z | 11 | 75770   | 75798   | 274564      | Mhap | /rhSeq-f/CCA ATT TAT GGT AGA GGA TTA GTA TC rA<br>CTT G/GT3/                                                  | /rhSeq-r/CTT TAC TAA TTT CAG TTA TGT ATA<br>ATG CC rC ATT G/GT1/                                                         |
| RH.3909CDB67E8543CZ0Z | 11 | 177898  | 177971  | 276606      | Mhap | /rhSeq-f/GGT TTT CAC TCC CTC CAC TrCA TTT /GT1/<br>/rhSeq-f/TAA CCA CCA CTG TGT TAT CCA TAT rCTG<br>TT/GT1/   | /rhSeq-r/GGC ACT CTT TTG AGT AGC AG rC TTG<br>A/GT3/<br>/rhSeq-r/TTA ATA AAG ACA CNA ATG TAG ATT<br>TGA AC rA ACA T/GT3/ |
| RH.E13F9A10B62A4BEZ0Z | 11 | 607788  | 607927  | 285205      | Mhap | /rhSeq-f/GCA CTN TCT GAT AGC ATG TrGG TCT /GT4/                                                               | /rhSeq-r/GAG ACC CAT CCA CAT CTG rCGA<br>AT/GT4/                                                                         |
| RH.7D6C9D6F4F5044AZ0Z | 11 | 1153666 | 1153850 | 296123      | Mhap | /rhSeq-f/ATG TGA CGT CTC TCC ACC rCCC CT/GT2/<br>/rhSeq-f/CAA AGT TGT AAA AGN GAT CTG CTC ArAA<br>TTT /GT3/   | /rhSeq-r/CTA CAT CCA NCA TAC TCT GC rA GGT<br>A/GT1/<br>/rhSeq-r/CAA GCC TGA CTG TTC AGA AAA ArAT<br>TTC /GT1/           |
| RH.230B0FFB8743402Z0Z | 11 | 1423369 | 1423519 | 301517      | Mhap |                                                                                                               |                                                                                                                          |

|                       |    |         |         |        |      |                                                                                                             |                                                                                                          |
|-----------------------|----|---------|---------|--------|------|-------------------------------------------------------------------------------------------------------------|----------------------------------------------------------------------------------------------------------|
| RH.9D2EBAFECC02434Z0Z | 11 | 1572690 | 1572840 | 304503 | Mhap | /rhSeq-f/GCC GCT CTA CAA GGG ArGA AGT /GT2/<br>/rhSeq-f/GTT GTT AAC TCG TAA GCT GTT GArG GAA G/GT3/         | /rhSeq-r/CCT TGC GCC TGA AGT TAT rCGT AC/GT1/<br>/rhSeq-r/AGG CGA ATA ACC CAC GTA AGrG ACA A/GT3/        |
| RH.2449A198108D4EDZ0Z | 11 | 1742120 | 1742207 | 307891 | Mhap |                                                                                                             |                                                                                                          |
| RH.DC722708FE7E46FZ0Z | 11 | 2001515 | 2001699 | 313080 | Mhap | /rhSeq-f/GCN CTT CAT GTT TAC AGT GTrA AGC A/GT3/<br>/rhSeq-f/CTG GTG AAG GTG AAG GAA AAT GAA ArCT ATT /GT3/ | /rhSeq-r/TCA TTC GCC TCG ATG GAA rGAC AC/GT2/<br>/rhSeq-r/CCA TCT ATG TTT TCC GTT TTC TGC rGTC TT/GT3/   |
| RH.B289254C8C0F4D9Z0Z | 12 | 324220  | 324242  | 322153 | Mhap | /rhSeq-f/GAA ACG AAA TAT GCC GAC ATC TrAT TCT /GT1/                                                         | /rhSeq-r/TTG CAA AAA GCC GAA GGT TTT rCAC CA/GT2/                                                        |
| RH.B058277019D04D7Z0Z | 12 | 532970  | 533101  | 326331 | Mhap | /rhSeq-f/AGT GGA ATT TGT AAA AAT ATT AAG TAT GArA GTA C/GT1/                                                | /rhSeq-r/CTA TCA AAC ATG TCA ACG ACT GAA GrGA GAT /GT4/                                                  |
| RH.64D26ADFAE5B4C9Z0Z | 12 | 671183  | 671280  | 329094 | Mhap | /rhSeq-f/CAT ATG TGT TTG AAC GAT TCT TAC GTrA TGT T/GT1/                                                    | /rhSeq-r/TGG AAA AGC GAT TCA TAA TTT TTA GAG rCAA CG/GT1/                                                |
| RH.AB04234C54EB428Z0Z | 12 | 995697  | 995758  | 335584 | Mhap | /rhSeq-f/CTT TAT GTT GGA GAC TGA TTT GTT rCGC CT/GT1/                                                       | /rhSeq-r/GTG CTA ATC GAG AAG ATC CTA ACrG AAC G/GT3/                                                     |
| RH.F5FE56DD7B144F1Z0Z | 12 | 1291327 | 1291407 | 341498 | Mhap | /rhSeq-f/GAG AAT AAA ATA CCC CTT CAA ATG GArG GAA G/GT1/                                                    | /rhSeq-r/CAT ATG TCA ATG TGA TTA CTT CTT GGT rGAA GC/GT4/                                                |
| RH.D427FB9C888748FZ0Z | 12 | 1457399 | 1457514 | 344819 | Mhap |                                                                                                             |                                                                                                          |
| RH.E926E30943B14DCZ0Z | 12 | 1880553 | 1880581 | 353283 | Mhap | /rhSeq-f/GCT TGG TTT TCT GCA CCA GrGT CAT /GT3/                                                             | /rhSeq-r/TTG GAC GCC TTC CTG AAG rGAC TC/GT3/                                                            |
| RH.7B5B62F5A6C54CBZ0Z | 12 | 1945902 | 1946055 | 354590 | Mhap | /rhSeq-f/TGT ATN CTC CAT TTG GGA GTrC CAC C/GT1/<br>/rhSeq-f/TGA TGG TCT TTA CAC ACT CGT rATA GG/GT4/       | /rhSeq-r/CCA GAT GAG CAA CCC AArC GGA A/GT2/<br>/rhSeq-r/AAC CCG ATG ATG CCA TAG AArG GTG T/GT1/         |
| RH.A4206DB085EE47DZ0Z | 12 | 2108485 | 2108611 | 357841 | Mhap | /rhSeq-f/CCA TAT TTA TAT CTT CAT CAT CGC TTT TrCT TCC /GT3/                                                 | /rhSeq-r/ATT ATA AAT TCA GAC TCA TCT TAT TCA TCrC NAT G/GT4/                                             |
| RH.524A823035CE473Z0Z | 12 | 2465991 | 2466085 | 364991 | Mhap |                                                                                                             |                                                                                                          |
| RH.8971DA4524DB42FZ0Z | 12 | 2724027 | 2724063 | 370151 | Mhap | /rhSeq-f/TCA CTC CTT TGC TCA GTC rCTG TT/GT4/                                                               | /rhSeq-r/GAC GAA ACG GAT AAA TTG CTA CArC TAC T/GT4/                                                     |
| RH.D7309B8EBCBD4ECZ0Z | 13 | 167460  | 167596  | 382674 | Mhap | /rhSeq-f/TGG ACG GCG ACA TCT GTrG AAC T/GT1/                                                                | /rhSeq-r/CGG AGC TGT TTA GCA GGT rCAT TC/GT2/                                                            |
| RH.F252700317D4403Z0Z | 13 | 293615  | 293708  | 385196 | Mhap | /rhSeq-f/AAC TGT CTC AGG TAA TTG CCrC CCT C/GT3/                                                            | /rhSeq-r/AGT TGG AAA GGA GAC AGA AAA ATrA TGG C/GT4/                                                     |
| RH.9E1CA1645B3C421Z0Z | 13 | 485702  | 485833  | 389038 | Mhap | /rhSeq-f/GTG GGA TGG TCT CTA CTT ATrG TGA C/GT3/<br>/rhSeq-f/GAA GTG TTA AAA TTA ACT GGA GCA ArAT ATG /GT4/ | /rhSeq-r/CAA TAA CAG CTC CTT CAA CTT rCGA GA/GT4/<br>/rhSeq-r/GCA CAT CAT TGT AAT CCT GGA TrGA AGG /GT4/ |
| RH.CA5B246F7CB148AZ0Z | 13 | 754813  | 754885  | 394419 | Mhap |                                                                                                             |                                                                                                          |
| RH.49DD6A84FF2848AZ0Z | 13 | 1197713 | 1197831 | 403278 | Mhap | /rhSeq-f/GCC GAC TAT CGC ACT TTT rGTT CT/GT2/                                                               | /rhSeq-r/TTG CAG AAG GAT GCT CTG ArAT GAG /GT4/                                                          |
| RH.28A3310975E14FDZ0Z | 13 | 1865343 | 1865483 | 416631 | Mhap | /rhSeq-f/TTT CCG TGG CTN AGT GGrC GAC T/GT1/<br>/rhSeq-f/AAG AAA CTG CTA TAC TGT TTG CrCT ACG /GT4/         | /rhSeq-r/AGG TGT CAG CGC TAG CrGG CAG /GT1/<br>/rhSeq-r/ATC CAT TGA ATA ACC CGC TTT rGCA CT/GT3/         |
| RH.668CC46600DF42AZ0Z | 13 | 1985698 | 1985814 | 419038 | Mhap |                                                                                                             |                                                                                                          |

|                       |     |         |         |              |         |                                                                                                           |                                                                 |
|-----------------------|-----|---------|---------|--------------|---------|-----------------------------------------------------------------------------------------------------------|-----------------------------------------------------------------|
| RH.AA0D417E764C4FDZ0Z | 14  | 56852   | 57021   | 422331       | Mhap    | /rhSeq-f/CAA TAA ATC GAC CAA GNT TCT TTC CArG<br>AAT A/GT4/                                               | /rhSeq-r/TGC ATT TAT CTA TTA TGG TAG CAT<br>AAT GGrA TAA T/GT4/ |
| RH.EA14E24E533148FZ0Z | 14  | 462743  | 462837  | 430447       | Mhap    | /rhSeq-f/CAG GCT CAT TGG AAT GGT TGrC TAC T/GT2/                                                          | /rhSeq-r/AAT ACA GAA GTG TAC CAA GCC rGTA<br>GC/GT1/            |
| RH.D19C9EEADCE7431Z0Z | 14  | 675630  | 675699  | 434704       | Mhap    | /rhSeq-f/AAC GAC ATC CTC AAT TGG AAA rCAG<br>GG/GT2/                                                      | /rhSeq-r/GTC CCA AAC TTT CAA GCT GTrA AAA<br>G/GT1/             |
| RH.FF5E58E56C4B4E5Z0Z | 14  | 1206462 | 1206642 | 445323       | Mhap    | /rhSeq-f/CTT ATT GTG CAG GGA AAA CCA rCAA<br>AT/GT4/                                                      | /rhSeq-r/TCA GGG AGC TAA ACG ATT ACA rGCA<br>AC/GT1/            |
| RH.2CD34BE4DF1F4B6Z0Z | 14  | 1270400 | 1270401 | DHPS_A553G   | Drug    | /rhSeq-f/CTG CAA CAG CTT AAT AGA CTG rGTC<br>GT/GT2/                                                      | /rhSeq-r/AGC GTC GTT TTA ATG CAC AArG AGG<br>G/GT2/             |
| RH.C975D06C896447DZ0Z | 14  | 1270910 | 1270911 | DHPS_A383G   | Drug    | /rhSeq-f/AAC CTC ACA CTC CAA CTT ATG rCCA<br>CT/GT3/                                                      | /rhSeq-r/CTT TTC AGA TGG CGG TTT ATT TrGT<br>CGA /GT1/          |
| RH.436418B818FD4C7Z0Z | 14  | 1546237 | 1546249 | 452117       | Mhap    | /rhSeq-f/ATT GGG AAA CAG GAG AAA TGT TTA TrGG<br>GTA /GT1/                                                | /rhSeq-r/TAA GTC GTA ACC ATC AGG TAG TTT<br>TrAT GAA /GT1/      |
| RH.21577148368744AZ0Z | 14  | 1763089 | 1763164 | 456454       | Mhap    | /rhSeq-f/CGC ATG CAA AAG GAA AAT TAA ATG TTrC<br>ACT C/GT3/                                               | /rhSeq-r/ACA AGA GTT ACA CTA TTC GCT TTT<br>rGCG CT/GT3/        |
| RH.04C2CDE0F619407Z0Z | 14  | 1887637 | 1887677 | 458944       | Mhap    | /rhSeq-f/GTT AGA GAG TGG CAT GGA TGT rGAA<br>TT/GT1/                                                      | /rhSeq-r/AAT ACC CGA GCA TCC TAA ACA rGAT<br>CA/GT4/            |
| RH.771A53FD18D3457Z0Z | 14  | 2022558 | 2022663 | 461645       | Mhap    | /rhSeq-f/TCC CTT TTC TAT GAG GCT AAC TArG CTC<br>T/GT3/                                                   | /rhSeq-r/GGC AAC GAA CTC ATC CAA TTA GrGA<br>AAC /GT2/          |
| RH.33061656A3E54DDZ0Z | 14  | 2189680 | 2189767 | 464987       | Mhap    | /rhSeq-f/CCT GCA GTT TGC CTT TTT GrCA CAT /GT3/<br>/rhSeq-f/ACT ATC TAA CGA GTA GCA GCrA GCG<br>G/GT1/    | /rhSeq-r/AGA ACC TCC ACG CAG TAC rCTG<br>TT/GT1/                |
| RH.0473747F9CDA4F7Z0Z | 14  | 2261604 | 2261794 | 466426       | Mhap    | /rhSeq-f/ACT ATC TAA CGA GTA GCA GCrA GCG<br>G/GT1/                                                       | /rhSeq-r/CGT TGT TNA GAG GTC CTC TrCT GGA<br>/GT2/              |
| RH.3AE56662E23E463Z0Z | 14  | 2699925 | 2700045 | 475191       | Mhap    | /rhSeq-f/AAA ACG GTG CTC TTG TCG rGTG GT/GT4/<br>/rhSeq-f/AAC TTA TTG AGG ATG TTA TGG AAG rAGN<br>GA/GT4/ | /rhSeq-r/GAA AAA GTG GGC CCG GTrG GAA<br>A/GT2/                 |
| RH.BDE839E951D14CAZ0Z | 14  | 2861965 | 2862134 | 478433       | Mhap    | /rhSeq-f/GCG ATA TCA CTT TTT AAG TCA TCG rAAT<br>GA/GT4/                                                  | /rhSeq-r/CTT ACT GCA CCC AGA CAA TAA GrGA<br>CTT /GT2/          |
| RH.B3F556D4B68B487Z0Z | 14  | 3009930 | 3010081 | 481392       | Mhap    | /rhSeq-f/GCG ATA TCA CTT TTT AAG TCA TCG rAAT<br>GA/GT4/                                                  | /rhSeq-r/TAA GCC ACT AGN GTA TGA TGA CGrA<br>ATT T/GT3/         |
| RH.7E13E7FC3A8D47CZ0Z | MIT | 2930    | 3141    | MIT_Species2 | Species | /rhSeq-f/CAT CGC AGC CTT GCA ATA AAT TAA TrAT<br>TAT /GT1/                                                | /rhSeq-r/CAG TCG AGT TCC TTT AAT GTA GTT<br>TCrC TCA C/GT4/     |

184

185 \*Mhap (microhaplotype), Drug (putative drug resistance marker), Species (mitochondrial *Plasmodium* spp. marker).

## 186 **Supplementary Note 2. Bioinformatic Pipeline for rhAmpSeq data analysis**

187

188 The snakemake-based pipeline provides two separate data analysis options that both require  
189 demultiplexed fastq files in a separate folder as input. As part of the pipeline, parameters are given  
190 in the config.yaml file, which can be modified as required.

191

192 a) The first analysis option performs SNP based variant calling using the provided reference genome  
193 PvP01\_v2. The steps are as following:

- 194 (1) Generate manifest: This traverses the directory, identify the input fastq files and create a  
195 metadata file. This ensures that the forward and reverse reads belonging to the same  
196 sample are treated as such. The manifest is subsequently used by the pipeline to place the  
197 reads of each sample into its own directory adhering to the directory structure the pipeline  
198 requires.
- 199 (2) Mapping: The fastq files are mapped against the provided reference genome using bwa-  
200 mem2 and can be optionally trimmed prior. The alignment map (BAM) files are subsequently  
201 filtered to reads mapped in proper pairs.
- 202 (3) Base calibration: This step involves generating a recalibration table to detect systematic  
203 errors made by the sequencing machine when estimating the accuracy of each base call by  
204 comparing them to known sites of variation using GATK's BaseRecalibrator. The base quality  
205 scores in the input BAM file are then adjusted with GATK's ApplyBQSR according to the  
206 patterns identified in the recalibration table. The known variant database can be updated  
207 with knownvariants\_dir in config file.
- 208 (4) Individual sample variant calling: Variant calling is performed for each sample against the  
209 reference genome using GATK's HaplotypeCaller with the following parameters "--max-  
210 reads-per-alignment-start 0 --do-not-run-physical-phasing --pileup-detection --dont-use-  
211 soft-clipped-bases". The parameters can be tweaked at the config file under  
212 haplotypcaller\_flags.
- 213 (5) Joint variant calling: The GVCF outputs from previous step are used perform joint variant  
214 calling with GATK's GenotypeGVCFs. This step generates the final VCF outputs containing all  
215 the variants found in all the samples.

216

217 b) The second analysis option creates microhaplotypes from the same input files using 1) fasta files  
218 containing the forward and reverse primer sequences for all target markers, (2) a bed file containing  
219 the chromosome, start position, end position and name of each target marker, as well as (3) a fasta  
220 file of the target regions from the PvP01.v2 reference. The individual processes are listed here:

221

- 222 (1) Trim: Trimming of adapters and primers using cutadapt with the options --pair-adapters  
223 which will pair every R1 with its corresponding R2 adapter and --discard-untrimmed which  
224 will remove read pairs with missing adapters and --action=trim to remove the adapter.
- 225 (2) Create\_meta: This takes the input folder of trimmed fastq files and creates an input sample  
226 list for the next process by finding the correct sample pattern (--pattern\_fw  
227 \*R1.trimmed.fastq.gz and --pattern\_rv \*R2.trimmed.fastq.gz)
- 228 (3) Run\_dada2R: This process performs the dada2 based analysis of the trimmed files. The  
229 following parameters were used:

- 230 (a) class: "parasite" as we looked at Plasmodium samples  
231 (b) maxEE: "5,5" this represents the maximum number of expected errors allowed  
232 (c) trim\_right: "10,10": we noticed that the amplicon sequencing data occasionally lost  
233 quality in the last 4-10 reads requiring this option to cut off 10bp from the right  
234 (d) min\_length: 30: discard reads that are shorter than 30bp  
235 (e) truncQ: "5,5" reads will be truncated as soon as the first base phred quality score is  
236 below 5  
237 (f) max\_consist: 10 The maximum number of steps when selfConsist=TRUE  
238 (g) omegaA: 1e-120: treshold for significantly overabundance  
239 (h) justconcat: 0: turn off concatenation instead of merging  
240 (i) platform: "PE": set the platform to paired-end reads  
241 (j) trimqv: 15  
242 (4) post\_process: custom script that turns the dada2 output seqtab table into an ASV (Amplicon  
243 Sequence Variant) Table as well as and ASVSeqs fasta file using the (3) fasta file  
244 (5) asv\_to\_cigar: this custom script transforms the ASVs into CIGAR (Concise Idiosyncratic  
245 Gapped Alignment Report) strings.  
246
